# Supplementary material for: Dynamic kinetic resolution of atropisomeric N-arylindoles via chiral N-triflyl phosphoramide catalyzed asymmetric reductive amination
Source: Royal Society of Chemistry journal article supplement (doi:10.1039/d4qo00616j), 2024-01-01

# Supporting Information

## Dynamic kinetic resolution of atropisomeric *N*-arylindoles via chiral *N*-triflyl phosphoramidate catalyzed asymmetric reductive amination

You-Dong Shao,<sup>\*a</sup> Dan-Dan Han,<sup>\*a</sup> Hong-Xin Jiang,<sup>b</sup> Xin-Yu Zhou,<sup>b</sup> Wei-Kang Wang,<sup>a</sup> Jia-Xi Zhang,<sup>a</sup> Ya-Fei Liu,<sup>a</sup> and Dao-Juan Cheng<sup>\*b</sup>

<sup>a</sup>School of Chemistry and Chemical Engineering, Heze University, Heze 274015, China

<sup>b</sup>School of Pharmacy, Anhui University of Chinese Medicine, Hefei 230012, China

### Table of Contents

|                                                                                                                               |     |
|-------------------------------------------------------------------------------------------------------------------------------|-----|
| General Information .....                                                                                                     | S2  |
| Screening of Catalysts and Condition Optimization .....                                                                       | S2  |
| Preparation and Analytic Data of <b>1</b> .....                                                                               | S4  |
| General Procedure for the Synthesis of Atropisomeric <i>N</i> -Arylindoles via Catalytic Asymmetric Reductive Amination ..... | S6  |
| Procedure for the Scale-up Experiment .....                                                                                   | S6  |
| Procedure for the Transformation of Product <b>4aa</b> .....                                                                  | S7  |
| Procedure for the Kinetic Resolution .....                                                                                    | S7  |
| References .....                                                                                                              | S7  |
| Analytic Data for the Products .....                                                                                          | S8  |
| The Absolute Stereochemistry Discussion .....                                                                                 | S22 |
| Investigation on the Enantiomerization Barrier .....                                                                          | S34 |
| NMR Spectra of <b>1</b> .....                                                                                                 | S36 |
| NMR Spectra of Products .....                                                                                                 | S41 |
| HPLC Traces .....                                                                                                             | S88 |

## General Information

$^1\text{H}$ ,  $^{13}\text{C}$  and  $^{19}\text{F}$  NMR spectra were recorded on a Bruker AC-400 FT (400 MHz for  $^1\text{H}$  NMR, 100 MHz for  $^{13}\text{C}$  NMR and 376 MHz for  $^{19}\text{F}$  NMR respectively) or a Bruker AVANCE NEO 600 (600 MHz for  $^1\text{H}$  NMR, 150 MHz for  $^{13}\text{C}$  NMR and 565 MHz for  $^{19}\text{F}$  NMR respectively) using tetramethylsilane as an internal reference. Chemical shifts ( $\delta$ ) and coupling constants ( $J$ ) were expressed in ppm and Hz, respectively. High resolution mass spectra (HRMS) were recorded on a LC-TOF spectrometer (Micromass). ESI-HRMS data were acquired using a Thermo LTQ Orbitrap XL Instrument equipped with an ESI source and controlled by Xcalibur software. High pressure liquid chromatography (HPLC) analyses were performed on a Thermo Scientific UltiMate 3000 instrument equipped with an isostatic pump, using a chiral stationary phase column (Daicel Co. CHIRALPAK). The chiral HPLC methods were calibrated with the corresponding racemic mixtures. Optical Rotation was measured on an Anton Paar MCP 100/150 polarimeter.

Chemicals were purchased from the Sinopharm Chemical Reagent Co., Adamas, Acros, Alfa Aesar, and TCI, and used as received. Catalysts **C1-C3**, **C14** and **C17** were prepared according to the literatures.<sup>1</sup> Other Catalysts were purchased from Daicel Chiral Technologies (China) CO., LTD. and used directly. Hantzsch esters **3** were prepared in accordance with the previously described procedure.<sup>2</sup>

## Screening of Catalysts and Condition Optimization

Table S1. Screening of catalysts and solvents.<sup>a</sup>

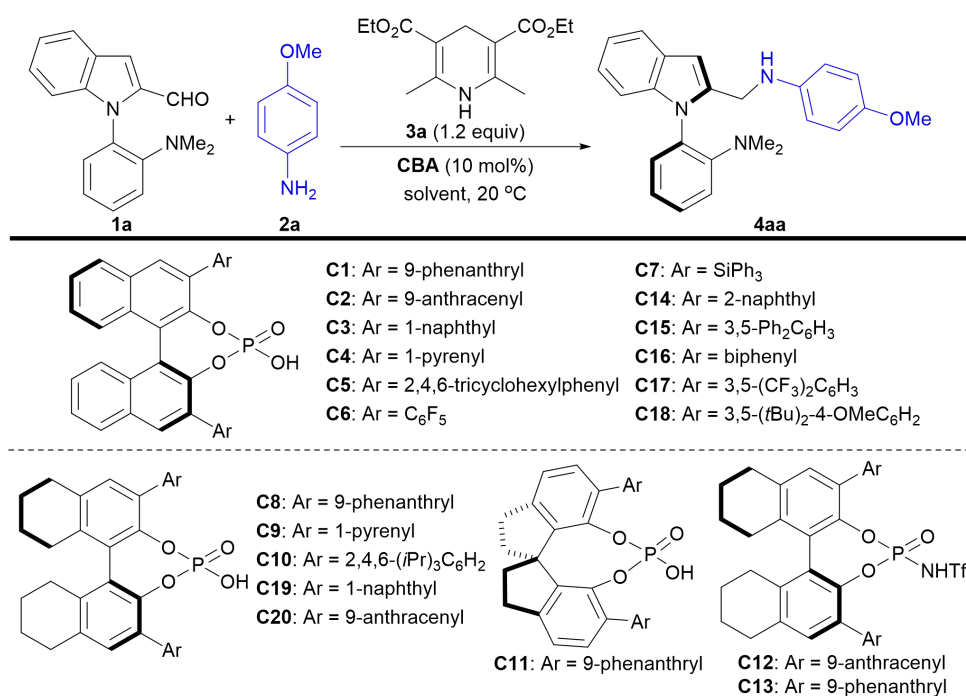

| entry | CBA | solvent                             | yield <sup>b</sup> [%] | ee <sup>c</sup> [%] |
|-------|-----|-------------------------------------|------------------------|---------------------|
| 1     | C1  | DCM                                 | 90                     | 34                  |
| 2     | C2  | DCM                                 | 90                     | 37                  |
| 3     | C3  | DCM                                 | 92                     | 25                  |
| 4     | C4  | DCM                                 | 85                     | 40                  |
| 5     | C5  | DCM                                 | 87                     | 5                   |
| 6     | C6  | DCM                                 | 90                     | 32                  |
| 7     | C7  | DCM                                 | 81                     | -4                  |
| 8     | C8  | DCM                                 | 89                     | 55                  |
| 9     | C9  | DCM                                 | 85                     | 52                  |
| 10    | C10 | DCM                                 | 86                     | 35                  |
| 11    | C11 | DCM                                 | 88                     | 2                   |
| 12    | C12 | DCM                                 | 92                     | <b>71</b>           |
| 13    | C13 | DCM                                 | 90                     | 60                  |
| 14    | C14 | DCM                                 | 92                     | 7                   |
| 15    | C15 | DCM                                 | 86                     | 12                  |
| 16    | C16 | DCM                                 | 88                     | 0                   |
| 17    | C17 | DCM                                 | 91                     | 4                   |
| 18    | C18 | DCM                                 | 87                     | 4                   |
| 19    | C19 | DCM                                 | 92                     | 4                   |
| 20    | C20 | DCM                                 | 92                     | 55                  |
| 21    | C12 | <i>n</i> -hexane                    | 76                     | 48                  |
| 22    | C12 | EtOH                                | 84                     | 51                  |
| 23    | C12 | CH <sub>3</sub> CN                  | 88                     | 42                  |
| 24    | C12 | THF                                 | 78                     | 68                  |
| 25    | C12 | EtOAc                               | 80                     | 60                  |
| 26    | C12 | toluene                             | 82                     | 48                  |
| 27    | C12 | CH <sub>3</sub> NO <sub>2</sub>     | 85                     | 66                  |
| 28    | C12 | PhCl                                | 85                     | 55                  |
| 29    | C12 | CHCl <sub>3</sub>                   | 90                     | 65                  |
| 30    | C12 | DCE                                 | 91                     | 73                  |
| 31    | C12 | CF <sub>3</sub> CH <sub>2</sub> OH  | 88                     | 56                  |
| 32    | C12 | Cl <sub>2</sub> CHCHCl <sub>2</sub> | <b>94</b>              | <b>80</b>           |

<sup>a</sup>Unless otherwise stated, all reactions were carried out with 1-(2-(dimethylamino)phenyl)-1*H*-indole-2-carbaldehyde **1a** (13.2 mg, 0.05 mmol), 4-methoxyaniline **2a** (7.3 mg, 0.06 mmol), Hantzsch ester **3a** (0.06 mmol), CBA (10 mol%) and solvent (1.0 mL) at 20 °C in a sealed tube for 4 h. <sup>b</sup>Isolated yield. <sup>c</sup>Determined by chiral stationary phase HPLC analysis.

**Table S2. Screening of Hantzsch esters **3**, additive, temperatures *et al.*<sup>a</sup>**

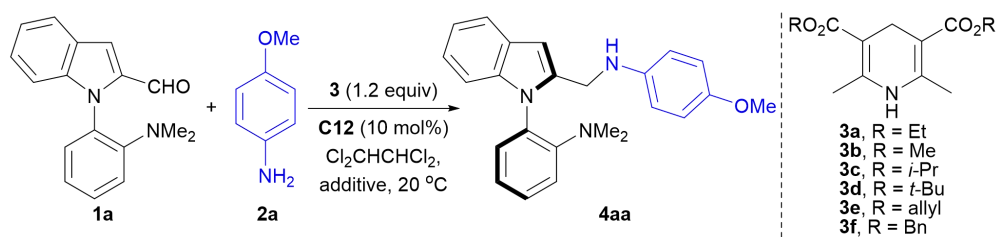

| entry           | <b>3</b>  | additive                  | yield <sup>b</sup> [%] | ee <sup>c</sup> [%] |
|-----------------|-----------|---------------------------|------------------------|---------------------|
| 1               | <b>3a</b> | none                      | 94                     | 80                  |
| 2               | <b>3b</b> | none                      | 92                     | 79                  |
| 3               | <b>3c</b> | none                      | 92                     | 83                  |
| 4               | <b>3d</b> | none                      | 94                     | <b>87</b>           |
| 5               | <b>3e</b> | none                      | 90                     | 78                  |
| 6               | <b>3f</b> | none                      | 91                     | 82                  |
| 7               | <b>3d</b> | 4Å MS (50 mg)             | <b>94</b>              | <b>89</b>           |
| 8               | <b>3d</b> | 5Å MS (50 mg)             | 94                     | 87                  |
| 9               | <b>3d</b> | 3Å MS (50 mg)             | 92                     | 86                  |
| 10              | <b>3d</b> | MgSO <sub>4</sub> (50 mg) | 91                     | 88                  |
| 11              | <b>3d</b> | 4Å MS (150 mg)            | 90                     | 87                  |
| 12 <sup>d</sup> | <b>3d</b> | 4Å MS (50 mg)             | 85                     | 86                  |

<sup>a</sup>Unless otherwise stated, all reactions were carried out with **1a** (13.2 mg, 0.05 mmol), 4-methoxyaniline **2a** (7.3 mg, 0.06 mmol), Hantzsch ester **3** (0.06 mmol), **C12** (10 mol%) and Cl<sub>2</sub>CHCHCl<sub>2</sub> (1.0 mL) at 20 °C in a sealed tube for 4 h. <sup>b</sup>Isolated yield. <sup>c</sup>Determined by chiral stationary phase HPLC analysis. <sup>d</sup>The reaction was run at 0 °C for 8 h.

### Preparation and Analytic Data of **1**

1-(2-(Dimethylamino)phenyl)-1*H*-indole-2-carbaldehydes **1** were prepared in accordance with literature methods.<sup>3</sup> The new compounds were characterized in this report.

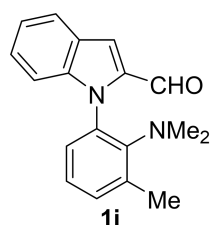

1-(2-(Dimethylamino)-3-methylphenyl)-1*H*-indole-2-carbaldehyde **1i** was obtained as a brown solid. *R*<sub>f</sub> = 0.40 (petroleum ether/ethyl acetate = 12:1); m.p. 83-84 °C; <sup>1</sup>H NMR (600 MHz, CDCl<sub>3</sub>): δ 9.72 (s, 1H), 7.76 (d, *J* = 8.4 Hz, 1H), 7.44 (d, *J* = 1.2 Hz, 1H), 7.34-7.29 (m, 1H), 7.29-7.25 (m, 1H), 7.21-7.17 (m, 1H), 7.14-7.08 (m, 2H), 7.08-7.04 (m, 1H), 2.37 (s, 3H), 2.31 (s, 6H); <sup>13</sup>C NMR (150 MHz, CDCl<sub>3</sub>): δ 182.1, 148.6, 141.0, 136.7, 132.8, 132.8,



132.0, 127.3, 126.7, 126.6, 123.9, 123.1, 121.5, 113.4, 111.8, 42.1, 19.6; HRMS (ESI) calcd for C<sub>18</sub>H<sub>19</sub>N<sub>2</sub>O (M+H)<sup>+</sup> 279.1492, found 279.1486.

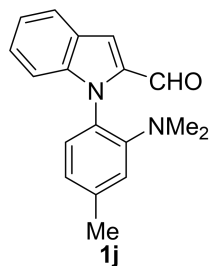

1-(2-(Dimethylamino)-4-methylphenyl)-1*H*-indole-2-carbaldehyde **1j** was obtained as a brown solid.  $R_f = 0.30$  (petroleum ether/ethyl acetate = 12:1); m.p. 75-76 °C; <sup>1</sup>H NMR (600 MHz, CDCl<sub>3</sub>):  $\delta$  9.55 (s, 1H), 7.75 (d,  $J = 8.4$  Hz, 1H), 7.44 (s, 1H), 7.36-7.26 (m, 2H), 7.25-7.22 (m, 1H), 7.21-7.16 (m, 1H), 6.96-6.88 (m, 2H), 2.42 (s, 3H), 2.28 (s, 6H); <sup>13</sup>C NMR (150 MHz, CDCl<sub>3</sub>):  $\delta$  182.6, 149.0, 139.2, 138.9, 135.7, 128.8, 126.9, 126.4, 125.7, 123.1, 122.6, 121.6, 119.8, 111.3, 110.7, 42.0, 21.7; HRMS (ESI) calcd for C<sub>18</sub>H<sub>19</sub>N<sub>2</sub>O (M+H)<sup>+</sup> 279.1492, found 279.1488.

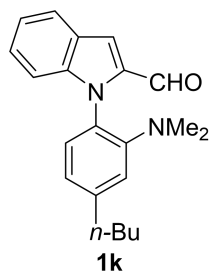

1-(4-Butyl-2-(dimethylamino)phenyl)-1*H*-indole-2-carbaldehyde **1k** was obtained as a brown solid.  $R_f = 0.30$  (petroleum ether/ethyl acetate = 12:1); m.p. 93-94 °C; <sup>1</sup>H NMR (600 MHz, CDCl<sub>3</sub>):  $\delta$  9.54 (s, 1H), 7.75 (d,  $J = 7.8$  Hz, 1H), 7.44 (s, 1H), 7.37-7.29 (m, 2H), 7.26 (d,  $J = 7.8$  Hz, 1H), 7.22-7.16 (m, 1H), 6.99-6.86 (m, 2H), 2.68 (t,  $J = 7.8$  Hz, 2H), 2.28 (s, 6H), 1.72-1.64 (m, 2H), 1.48-1.38 (m, 2H), 0.98 (t,  $J = 7.2$  Hz, 3H); <sup>13</sup>C NMR (150 MHz, CDCl<sub>3</sub>):  $\delta$  181.7, 147.9, 143.2, 137.7, 134.6, 127.7, 125.9, 125.2, 124.7, 122.0, 120.9, 120.5, 118.0, 110.3, 109.1, 40.9, 34.8, 32.5, 21.5, 13.0; HRMS (ESI) calcd for C<sub>21</sub>H<sub>25</sub>N<sub>2</sub>O (M+H)<sup>+</sup> 321.1961, found 321.1953.

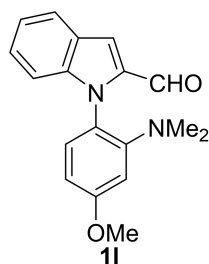

1-(2-(Dimethylamino)-4-methoxyphenyl)-1*H*-indole-2-carbaldehyde **1l** was obtained as a brown solid.  $R_f = 0.30$  (petroleum ether/ethyl acetate = 12:1); m.p. 70-71 °C; <sup>1</sup>H NMR (600

MHz, CDCl<sub>3</sub>):  $\delta$  9.58 (s, 1H), 7.76 (d,  $J$  = 8.4 Hz, 1H), 7.44 (s, 1H), 7.37-7.30 (m, 1H), 7.29-7.23 (m, 2H), 7.22-7.16 (m, 1H), 6.69-6.56 (m, 2H), 3.88 (s, 3H), 2.29 (s, 6H); <sup>13</sup>C NMR (150 MHz, CDCl<sub>3</sub>):  $\delta$  182.7, 160.2, 150.6, 139.2, 135.7, 130.1, 126.8, 126.4, 123.1, 121.5, 121.1, 111.4, 110.9, 105.8, 105.5, 55.5, 41.9; HRMS (ESI) calcd for C<sub>18</sub>H<sub>19</sub>N<sub>2</sub>O<sub>2</sub> (M+H)<sup>+</sup> 295.1441, found 295.1433.

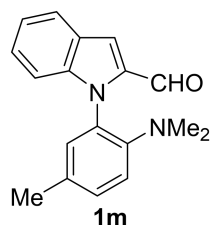

1-(2-(Dimethylamino)-5-methylphenyl)-1*H*-indole-2-carbaldehyde **1m** was obtained as a brown solid.  $R_f$  = 0.30 (petroleum ether/ethyl acetate = 12:1); m.p. 85-86 °C; <sup>1</sup>H NMR (600 MHz, CDCl<sub>3</sub>):  $\delta$  9.54 (s, 1H), 7.79-7.70 (m, 1H), 7.44 (s, 1H), 7.37-7.28 (m, 2H), 7.23-7.13 (m, 3H), 7.06-6.99 (m, 1H), 2.36 (s, 3H), 2.25 (s, 6H); <sup>13</sup>C NMR (150 MHz, CDCl<sub>3</sub>):  $\delta$  182.5, 146.8, 138.7, 135.7, 131.9, 129.8, 129.3, 128.4, 127.0, 126.3, 123.1, 121.6, 119.2, 111.3, 110.5, 42.2, 20.6; HRMS (ESI) calcd for C<sub>18</sub>H<sub>19</sub>N<sub>2</sub>O (M+H)<sup>+</sup> 279.1492, found 279.1485.

### General Procedure for the Synthesis of Atropisomeric *N*-Arylindoles via Catalytic Asymmetric Reductive Amination

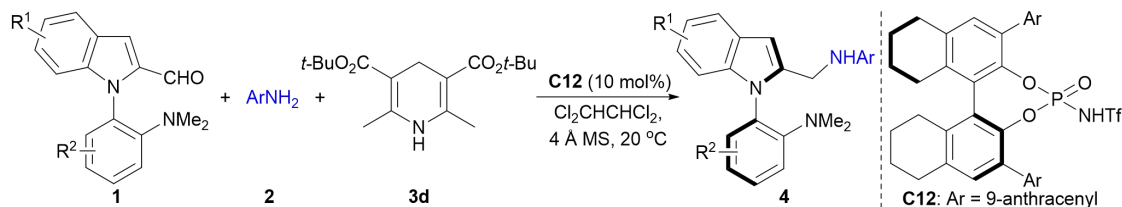

To a flame dried sealed tube equipped with a magnetic stirring bar were added *N*-arylidole aldehydes **1** (0.10 mmol), chiral *N*-triflyl phosphoramidite **C12** (8.4 mg, 0.010 mmol), Hantzsch ester **3d** (37.1 mg, 0.12 mmol), 4 Å MS (100 mg), Cl<sub>2</sub>CHCHCl<sub>2</sub> (2.0 mL) and aromatic amines **2** (0.12 mmol) successively. The resulting mixture was stirred at 20 °C for 4 h, and directly charged onto silica gel. Products **4** were isolated using petroleum ether/ethyl acetate (20:1 to 10:1) as eluent.

### Procedure for the Scale-up Experiment

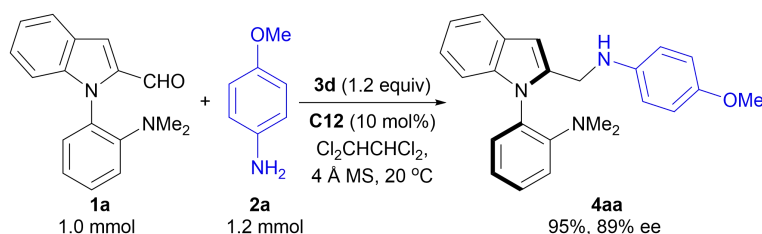

To a flame dried sealed tube equipped with a magnetic stirring bar were added 1-(2-(dimethylamino)phenyl)-1*H*-indole-2-carbaldehyde **1a** (1.0 mmol), chiral *N*-triflyl phosphoramidate **C12** (83.9 mg, 0.10 mmol), Hantzsch ester **3d** (371.0 mg, 1.2 mmol), 4 Å MS (1.0 g), Cl<sub>2</sub>CHCHCl<sub>2</sub> (20 mL) and 4-methoxyaniline **2a** (147.7 mg, 1.2 mmol) successively. The resulting mixture was stirred at 20 °C for 4 h, and directly charged onto silica gel. Product **4aa** was isolated using petroleum ether/ethyl acetate (20:1 to 10:1) as eluent.

#### Procedure for the Transformation of Product 4aa

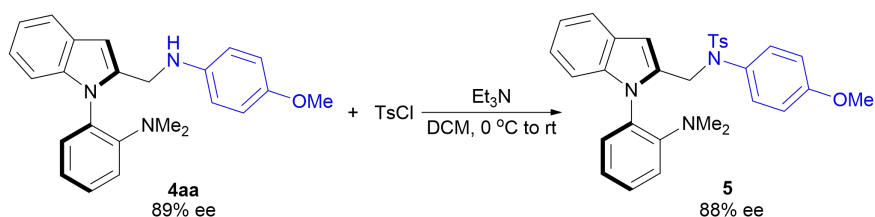

To a solution of **4aa** (37.1 mg, 0.10 mmol, 89% ee) and NEt<sub>3</sub> (20.2 mg, 27.8 uL, 0.20 mmol) in DCM (1.0 mL) was added 4-toluene sulfonyl chloride (28.6 mg, 0.15 mmol) at 0 °C. The resulting mixture was stirred at room temperature for 2 h, and directly charged onto silica gel, eluting with petroleum ether/ethyl acetate (10:1) to afford product **5** (48.8 mg, 93%, 88% ee).

#### Procedure for the Kinetic Resolution

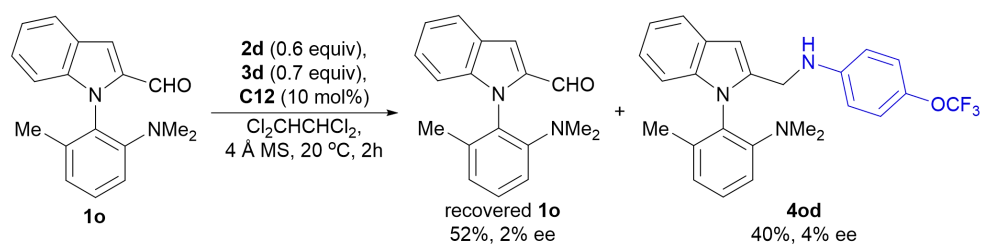

To a flame dried sealed tube equipped with a magnetic stirring bar were added chiral *N*-triflyl phosphoramidate **C12** (8.4 mg, 0.01 mmol), **1o** (27.8 mg, 0.10 mmol), Hantzsch ester **3d** (21.6 mg, 0.07 mmol), 4 Å MS (100 mg), Cl<sub>2</sub>CHCHCl<sub>2</sub> (2.0 mL) and 4-(trifluoromethoxy)aniline **2d** (10.6 mg, 0.06 mmol). The resulting mixture was stirred at 20 °C for 2 h, and directly charged onto silica gel. Product **4od** (17.6 mg, 40%, 4% ee) and recovered **1o** (14.5 mg, 52%, 2% ee) were isolated using petroleum ether/ethyl acetate (10:1 to 5:1) as eluent respectively.

#### References

- (a) Wipf, P.; Jung, J.-K. Formal Total Synthesis of (+)-Diepoxin  $\sigma$ . *J. Org. Chem.* **2000**, *65*, 6319.  
 (b) Yu, H.-B.; Hu, Q.-S.; Pu, L. The First Optically Active BINOL–BINAP Copolymer Catalyst: Highly Stereoselective Tandem Asymmetric Reactions. *J. Am. Chem. Soc.* **2000**, *122*, 6500. (c) Uraguchi, D.; Terada, M. Chiral Brønsted Acid-Catalyzed Direct Mannich Reactions via Electrophilic Activation. *J. Am. Chem. Soc.* **2004**, *126*, 5356.
- Larraufie, M.-H.; Pellet, R.; Fensterbank, L.; Goddard, J.-P.; Lacôte, E.; Malacria, M.; Ollivier,

C. Visible-Light-Induced Photoreductive Generation of Radicals from Epoxides and Aziridines. *Angew. Chem., Int. Ed.* **2011**, *50*, 4463.

3 (a) Rodríguez-Salamanca, P.; de Gonzalo, G.; Carmona, J. A.; López-Serrano, J.; Iglesias-Sigüenza, J.; Fernández, R.; Lassaletta, J. M.; Hornillos, V. Biocatalytic Atroposelective Synthesis of Axially Chiral *N*-Arylindoles via Dynamic Kinetic Resolution. *ACS Catal.* **2023**, *13*, 659. (b) Wang, L.; Yuan, W.-K.; Wang, Z.-K.; Luo, J.; Zhou, T.; Shi, B.-F. Synthesis of C–N Axial Chirality *N*-Arylindoles via Pd(II)-Catalyzed Free Amine-Directed Atroposelective C–H Olefination. *Chin. J. Chem.* **2023**, *41*, 2788.

### Analytic Data for the Products

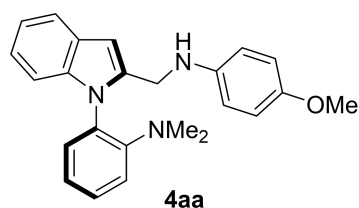

2-(2-(((4-Methoxyphenyl)amino)methyl)-1*H*-indol-1-yl)-*N,N*-dimethylaniline **4aa** was obtained as a yellowish oil in 94% yield (34.9 mg) and 89% ee.  $R_f = 0.20$  (petroleum ether/dichloromethane = 1:2). The ee value was determined by chiral stationary phase HPLC analysis [Daicel Chiralpak AS, isopropanol/hexane (10:90), 1.0 mL/min,  $\lambda = 254$  nm,  $t_r$  (major) = 8.00 min,  $t_r$  (minor) = 8.86 min].  $[\alpha]_D^{20} = -30.0$  ( $c = 0.60$ , EtOAc);  $^1\text{H NMR}$  (400 MHz,  $\text{CDCl}_3$ ):  $\delta$  7.58-7.52 (m, 1H), 7.38-7.32 (m, 1H), 7.20-7.16 (m, 1H), 7.12-7.05 (m, 4H), 7.04-6.99 (m, 1H), 6.74-6.68 (m, 2H), 6.57 (s, 1H), 6.54-6.49 (m, 2H), 4.23 (dd,  $J = 22.4$ , 10.4 Hz, 2H), 4.02 (s, br., 1H), 3.68 (s, 3H), 2.41 (s, 6H);  $^{13}\text{C NMR}$  (100 MHz,  $\text{CDCl}_3$ ):  $\delta$  152.3, 150.3, 142.2, 139.5, 138.2, 130.8, 129.4, 128.7, 128.3, 121.8, 121.6, 120.2, 120.1, 118.7, 114.9, 114.7, 110.4, 101.8, 55.8, 42.5, 41.9; HRMS (ESI) calcd for  $\text{C}_{24}\text{H}_{24}\text{N}_3\text{O}$  (M-H) $^-$  370.1925, found 370.1971.

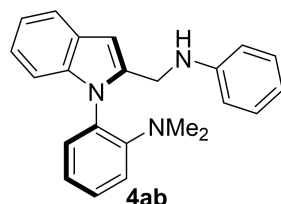

*N,N*-Dimethyl-2-(2-((phenylamino)methyl)-1*H*-indol-1-yl)aniline **4ab** was obtained as a yellowish oil in 92% yield (31.4 mg) and 87% ee.  $R_f = 0.40$  (petroleum ether/ethyl acetate = 12:1). The ee value was determined by chiral stationary phase HPLC analysis [Daicel Chiralpak OD-H, isopropanol/hexane (10:90), 1.0 mL/min,  $\lambda = 254$  nm,  $t_r$  (major) = 7.70 min,  $t_r$  (minor) = 9.14 min].  $[\alpha]_D^{20} = -33.3$  ( $c = 0.60$ , EtOAc);  $^1\text{H NMR}$  (400 MHz,  $\text{CDCl}_3$ ):  $\delta$  7.52-7.42 (m, 1H), 7.32-7.20 (m, 1H), 7.13-7.08 (m, 1H), 7.07-6.96 (m, 6H), 6.96-6.90 (m,

1H), 6.62-6.54 (m, 1H), 6.53-6.42 (m, 3H), 4.37-3.96 (m, 3H, CH<sub>2</sub>NH), 2.33 (s, 6H); <sup>13</sup>C NMR (100 MHz, CDCl<sub>3</sub>): δ 150.3, 148.0, 139.2, 138.3, 130.8, 129.4, 129.2, 128.7, 128.3, 121.8, 121.6, 120.3, 120.2, 118.7, 117.6, 113.2, 110.4, 101.8, 42.5, 40.9; HRMS (ESI) calcd for C<sub>23</sub>H<sub>22</sub>N<sub>3</sub> (M-H)<sup>-</sup> 340.1819, found 340.1853.

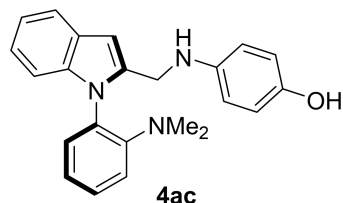

4-(((1-(2-(Dimethylamino)phenyl)-1*H*-indol-2-yl)methyl)amino)phenol **4ac** was obtained as a brown oil in 95% yield (33.9 mg) and 86% ee. *R*<sub>f</sub> = 0.20 (petroleum ether/ethyl acetate = 1:2). The ee value was determined by chiral stationary phase HPLC analysis [Daicel Chiralpak AS, isopropanol/hexane (10:90), 1.0 mL/min, λ = 254 nm, *t*<sub>r</sub> (major) = 26.37 min, *t*<sub>r</sub> (minor) = 32.07 min]. [α]<sub>D</sub><sup>20</sup> = -37.0 (c = 0.60, EtOAc); <sup>1</sup>H NMR (600 MHz, CDCl<sub>3</sub>): δ 7.59-7.51 (m, 1H), 7.40-7.32 (m, 1H), 7.20-7.15 (m, 1H), 7.14-7.05 (m, 4H), 7.05-7.00 (m, 1H), 6.57 (d, *J* = 8.4 Hz, 2H), 6.55 (s, 1H), 6.47 (d, *J* = 8.4 Hz, 2H), 4.20 (s, 2H), 2.40 (s, 6H); <sup>13</sup>C NMR (150 MHz, CDCl<sub>3</sub>): δ 150.2, 148.5, 141.4, 139.1, 138.2, 130.8, 129.4, 128.6, 128.2, 121.8, 121.6, 120.2, 120.1, 118.7, 116.2, 115.5, 110.4, 102.1, 42.4, 42.2; HRMS (ESI) calcd for C<sub>23</sub>H<sub>22</sub>N<sub>3</sub>O (M-H)<sup>-</sup> 356.1768, found 356.1753.

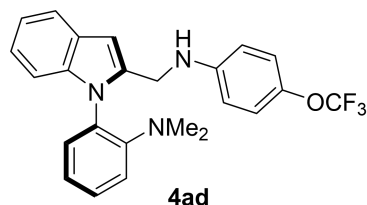

*N,N*-Dimethyl-2-((4-(trifluoromethoxy)phenyl)amino)methyl-1*H*-indol-1-yl)aniline **4ad** was obtained as a yellowish oil in 94% yield (40.0 mg) and 89% ee. *R*<sub>f</sub> = 0.40 (petroleum ether/ethyl acetate = 12:1). The ee value was determined by chiral stationary phase HPLC analysis [Daicel Chiralpak OD-H, isopropanol/hexane (20:80), 1.0 mL/min, λ = 254 nm, *t*<sub>r</sub> (major) = 5.10 min, *t*<sub>r</sub> (minor) = 6.76 min]. [α]<sub>D</sub><sup>20</sup> = -38.5 (c = 0.60, EtOAc); <sup>1</sup>H NMR (400 MHz, CDCl<sub>3</sub>): δ 7.64-7.50 (m, 1H), 7.42-7.32 (m, 1H), 7.19 (d, *J* = 7.2 Hz, 1H), 7.16-7.06 (m, 4H), 7.04 (t, *J* = 7.2 Hz, 1H), 6.96 (d, *J* = 8.4 Hz, 2H), 6.58 (s, 1H), 6.49 (d, *J* = 8.8 Hz, 2H), 4.40 (s, br., 1H), 4.29 (d, *J* = 15.6 Hz, 1H), 4.23 (d, *J* = 15.6 Hz, 1H), 2.42 (s, 6H); <sup>13</sup>C NMR (100 MHz, CDCl<sub>3</sub>): δ 150.2, 146.7, 140.5 (q, *J* = 2.0 Hz), 138.6, 138.3, 130.8, 129.5, 128.7, 128.2, 122.3, 122.0, 121.7, 120.8 (q, *J* = 253.5 Hz), 120.3, 120.2, 118.8, 113.4, 110.4, 102.0, 42.5, 41.1; <sup>19</sup>F NMR (376 MHz, CDCl<sub>3</sub>) δ -58.36; HRMS (ESI) calcd for C<sub>24</sub>H<sub>21</sub>F<sub>3</sub>N<sub>3</sub>O (M-H)<sup>-</sup> 424.1642, found 424.1632.

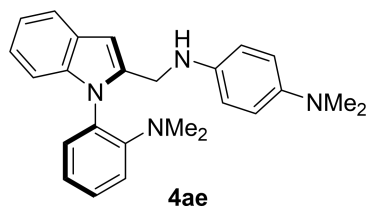

*N*<sup>1</sup>-((1-(2-(Dimethylamino)phenyl)-1*H*-indol-2-yl)methyl)-*N*<sup>4</sup>,*N*<sup>4</sup>-dimethylbenzene-1,4-diamine **4ae** was obtained as a yellowish oil in 93% yield (35.7 mg) and 86% ee. *R*<sub>f</sub> = 0.40 (petroleum ether/ethyl acetate = 12:1). The ee value was determined by chiral stationary phase HPLC analysis [Daicel Chiralpak OD-H, isopropanol/hexane (20:80), 1.0 mL/min, λ = 254 nm, *t*<sub>r</sub> (major) = 8.00 min, *t*<sub>r</sub> (minor) = 9.25 min]. [α]<sub>D</sub><sup>20</sup> = -40.7 (c = 0.60, EtOAc); <sup>1</sup>H NMR (600 MHz, CDCl<sub>3</sub>): δ 7.60-7.52 (m, 1H), 7.39-7.34 (m, 1H), 7.22-7.18 (m, 1H), 7.13-7.06 (m, 4H), 7.05-7.00 (m, 1H), 6.69 (d, *J* = 8.4 Hz, 2H), 6.59 (s, 1H), 6.56 (d, *J* = 8.4 Hz, 2H), 4.26 (d, *J* = 15.0 Hz, 1H), 4.20 (d, *J* = 15.0 Hz, 1H), 2.79 (s, 6H), 2.42 (s, 6H); <sup>13</sup>C NMR (150 MHz, CDCl<sub>3</sub>): δ 150.3, 144.1, 140.5, 139.7, 138.2, 130.8, 129.3, 128.6, 128.3, 121.6, 121.5, 120.2, 120.0, 118.6, 115.8, 114.8, 110.3, 101.8, 42.4, 42.3, 41.9; HRMS (ESI) calcd for C<sub>25</sub>H<sub>27</sub>N<sub>4</sub> (M-H)<sup>-</sup> 383.2241, found 383.2229.

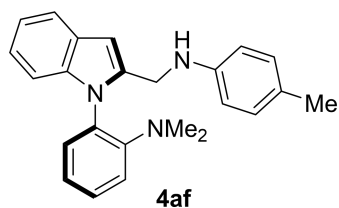

*N,N*-Dimethyl-2-((*p*-tolylamino)methyl)-1*H*-indol-1-yl)aniline **4af** was obtained as a yellowish oil in 92% yield (32.7 mg) and 85% ee. *R*<sub>f</sub> = 0.40 (petroleum ether/ethyl acetate = 12:1). The ee value was determined by chiral stationary phase HPLC analysis [Daicel Chiralpak OD-H, isopropanol/hexane (20:80), 1.0 mL/min, λ = 254 nm, *t*<sub>r</sub> (major) = 5.48 min, *t*<sub>r</sub> (minor) = 6.54 min]. [α]<sub>D</sub><sup>20</sup> = -31.0 (c = 0.60, EtOAc); <sup>1</sup>H NMR (400 MHz, CDCl<sub>3</sub>): δ 7.59-7.52 (m, 1H), 7.39-7.32 (m, 1H), 7.22-7.17 (m, 1H), 7.12-7.05 (m, 4H), 7.05-6.99 (m, 1H), 6.93 (d, *J* = 8.0 Hz, 2H), 6.58 (s, 1H), 6.53-6.45 (m, 2H), 4.34-4.19 (m, 2H), 4.15 (s, br., 1H), 2.42 (s, 6H), 2.20 (s, 3H); <sup>13</sup>C NMR (100 MHz, CDCl<sub>3</sub>): δ 150.3, 145.7, 139.4, 138.2, 130.8, 129.7, 129.4, 128.7, 128.3, 126.8, 121.7, 121.5, 120.2, 120.1, 118.7, 113.4, 110.3, 101.8, 42.4, 41.2, 20.5; HRMS (ESI) calcd for C<sub>24</sub>H<sub>24</sub>N<sub>3</sub> (M-H)<sup>-</sup> 354.1976, found 354.1961.

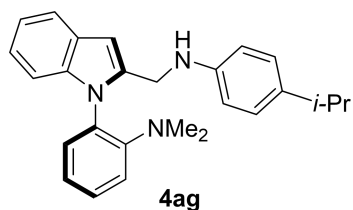

2-(2-(((4-Isopropylphenyl)amino)methyl)-1*H*-indol-1-yl)-*N,N*-dimethylaniline **4ag** was obtained as a yellowish oil in 93% yield (35.6 mg) and 87% ee.  $R_f = 0.40$  (petroleum ether/ethyl acetate = 12:1). The ee value was determined by chiral stationary phase HPLC analysis [Daicel Chiralpak OD-H, isopropanol/hexane (10:90), 1.0 mL/min,  $\lambda = 254$  nm,  $t_r$  (major) = 5.58 min,  $t_r$  (minor) = 6.95 min].  $[\alpha]_D^{20} = -29.7$  ( $c = 0.60$ , EtOAc);  $^1\text{H NMR}$  (400 MHz,  $\text{CDCl}_3$ ):  $\delta$  7.60-7.52 (m, 1H), 7.39-7.31 (m, 1H), 7.22-7.17 (m, 1H), 7.13-7.05 (m, 4H), 7.04-7.01 (m, 1H), 7.00-6.97 (m, 2H), 6.60 (s, 1H), 6.55-6.49 (m, 2H), 4.32-4.18 (m, 2H), 2.83-2.70 (m, 1H), 2.42 (s, 6H), 1.18 (d,  $J = 7.2$  Hz, 6H);  $^{13}\text{C NMR}$  (100 MHz,  $\text{CDCl}_3$ ):  $\delta$  150.3, 146.0, 139.5, 138.3, 138.1, 130.8, 129.4, 128.7, 128.3, 127.1, 121.7, 121.5, 120.2, 120.1, 118.7, 113.3, 110.4, 101.8, 42.4, 41.2, 33.2, 24.3; HRMS (ESI) calcd for  $\text{C}_{26}\text{H}_{28}\text{N}_3$  (M-H) $^-$  382.2289, found 382.2275.

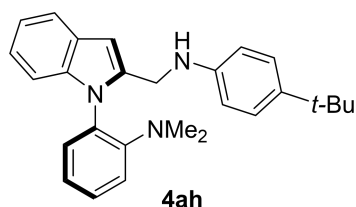

2-(2-(((4-(*Tert*-Butyl)phenyl)amino)methyl)-1*H*-indol-1-yl)-*N,N*-dimethylaniline **4ah** was obtained as a colourless oil in 94% yield (37.3 mg) and 89% ee.  $R_f = 0.40$  (petroleum ether/ethyl acetate = 12:1). The ee value was determined by chiral stationary phase HPLC analysis [Daicel Chiralpak OD-H, isopropanol/hexane (10:90), 1.0 mL/min,  $\lambda = 254$  nm,  $t_r$  (major) = 5.43 min,  $t_r$  (minor) = 6.72 min].  $[\alpha]_D^{20} = -39.0$  ( $c = 0.60$ , EtOAc);  $^1\text{H NMR}$  (400 MHz,  $\text{CDCl}_3$ ):  $\delta$  7.60-7.51 (m, 1H), 7.39-7.31 (m, 1H), 7.22-7.17 (m, 1H), 7.17-7.05 (m, 6H), 7.05-6.98 (m, 1H), 6.62-6.57 (m, 1H), 6.56-6.48 (m, 2H), 4.44-4.04 (m, 3H,  $\text{CH}_2\text{NH}$ ), 2.42 (s, 6H), 1.25 (s, 9H);  $^{13}\text{C NMR}$  (100 MHz,  $\text{CDCl}_3$ ):  $\delta$  150.3, 145.6, 140.3, 139.5, 138.3, 130.8, 129.4, 128.7, 128.3, 126.0, 121.7, 121.5, 120.2, 120.1, 118.7, 112.9, 110.4, 101.8, 42.4, 41.1, 33.9, 31.6; HRMS (ESI) calcd for  $\text{C}_{27}\text{H}_{30}\text{N}_3$  (M-H) $^-$  396.2445, found 396.2431.

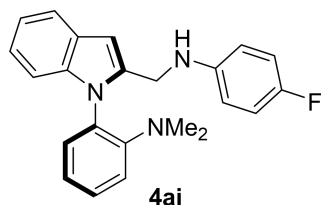

2-(2-(((4-Fluorophenyl)amino)methyl)-1*H*-indol-1-yl)-*N,N*-dimethylaniline **4ai** was obtained as a yellowish oil in 90% yield (32.3 mg) and 89% ee.  $R_f = 0.40$  (petroleum ether/ethyl acetate = 12:1). The ee value was determined by chiral stationary phase HPLC analysis [Daicel Chiralpak OD-H isopropanol/hexane (10:90), 1.0 mL/min,  $\lambda = 254$  nm,  $t_r$  (major) = 7.45 min,  $t_r$  (minor) = 9.55 min].  $[\alpha]_D^{20} = -40.2$  ( $c = 0.60$ , EtOAc);  $^1\text{H NMR}$  (400 MHz,  $\text{CDCl}_3$ ):  $\delta$

7.60-7.52 (m, 1H), 7.41-7.33 (m, 1H), 7.22-7.16 (m, 1H), 7.15-7.06 (m, 4H), 7.04 (t,  $J = 7.6$  Hz, 1H), 6.86-6.77 (m, 2H), 6.57 (s, 1H), 6.52-6.43 (m, 2H), 4.41-3.96 (m, 3H,  $\text{CH}_2\text{NH}$ ), 2.42 (s, 6H);  $^{13}\text{C}$  NMR (100 MHz,  $\text{CDCl}_3$ ):  $\delta$  155.9 (d,  $^1J_{\text{C-F}} = 233.7$  Hz), 150.2, 144.2 (d,  $^4J_{\text{C-F}} = 1.9$  Hz), 139.0, 138.2, 130.8, 129.4, 128.6, 128.2, 121.9, 121.6, 120.2, 120.1, 118.7, 115.6 (d,  $^2J_{\text{C-F}} = 22.2$  Hz), 114.1 (d,  $^3J_{\text{C-F}} = 7.4$  Hz), 110.3, 101.9, 42.4, 41.6;  $^{19}\text{F}$  NMR (376 MHz,  $\text{CDCl}_3$ )  $\delta$  -127.83; HRMS (ESI) calcd for  $\text{C}_{23}\text{H}_{21}\text{FN}_3(\text{M-H})^-$  358.1725, found 358.1713.

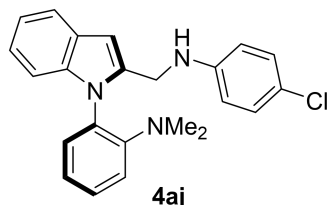

2-(2-(((4-Chlorophenyl)amino)methyl)-1H-indol-1-yl)-*N,N*-dimethylaniline **4aj** was obtained as a yellowish oil in 88% yield (33.0 mg) and 86% ee.  $R_f = 0.40$  (petroleum ether/ethyl acetate = 12:1). The ee value was determined by chiral stationary phase HPLC analysis [Daicel Chiralpak OD-H, isopropanol/hexane (20:80), 1.0 mL/min,  $\lambda = 254$  nm,  $t_r$  (major) = 6.27 min,  $t_r$  (minor) = 8.09 min].  $[\alpha]_{\text{D}}^{20} = -37.2$  ( $c = 0.60$ , EtOAc);  $^1\text{H}$  NMR (400 MHz,  $\text{CDCl}_3$ ):  $\delta$  7.61-7.50 (m, 1H), 7.42-7.31 (m, 1H), 7.21-7.16 (m, 1H), 7.15-6.96 (m, 7H), 6.56 (s, 1H), 6.46 (d,  $J = 8.8$  Hz, 2H), 4.31 (s, br., 1H), 4.27 (d,  $J = 15.6$  Hz, 1H), 4.21 (d,  $J = 15.6$  Hz, 1H), 2.41 (s, 6H);  $^{13}\text{C}$  NMR (100 MHz,  $\text{CDCl}_3$ ):  $\delta$  150.2, 146.5, 138.7, 138.3, 130.8, 129.5, 129.0, 128.6, 128.2, 122.1, 121.9, 121.7, 120.3, 120.2, 118.7, 114.3, 110.3, 101.9, 42.5, 41.1; HRMS (ESI) calcd for  $\text{C}_{23}\text{H}_{21}\text{ClN}_3(\text{M-H})^-$  374.1429, found 374.1463.

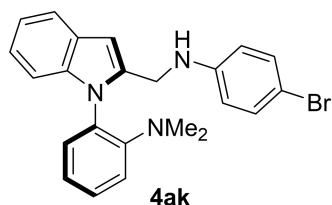

2-(2-(((4-Bromophenyl)amino)methyl)-1H-indol-1-yl)-*N,N*-dimethylaniline **4ak** was obtained as a yellow solid in 88% yield (36.9 mg) and 84% ee.  $R_f = 0.40$  (petroleum ether/ethyl acetate = 12:1); m.p. 76-77 °C. The ee value was determined by chiral stationary phase HPLC analysis [Daicel Chiralpak AS-H, isopropanol/hexane (10:90), 1.0 mL/min,  $\lambda = 254$  nm,  $t_r$  (major) = 6.66 min,  $t_r$  (minor) = 7.46 min].  $[\alpha]_{\text{D}}^{20} = -38.3$  ( $c = 0.60$ , EtOAc);  $^1\text{H}$  NMR (400 MHz,  $\text{CDCl}_3$ ):  $\delta$  7.62-7.50 (m, 1H), 7.43-7.32 (m, 1H), 7.24-7.15 (m, 3H), 7.14-7.06 (m, 4H), 7.04 (t,  $J = 7.6$  Hz, 1H), 6.56 (s, 1H), 6.42 (d,  $J = 8.4$  Hz, 2H), 4.53-3.94 (m, 3H,  $\text{CH}_2\text{NH}$ ), 2.41 (s, 6H);  $^{13}\text{C}$  NMR (100 MHz,  $\text{CDCl}_3$ ):  $\delta$  150.2, 146.9, 138.6, 138.3, 131.8, 130.8, 129.5, 128.6, 128.2, 121.9, 121.7, 120.3, 120.2, 118.7, 114.8, 110.3, 109.1, 101.9, 42.5, 40.9; HRMS (ESI) calcd for  $\text{C}_{23}\text{H}_{21}\text{BrN}_3(\text{M-H})^-$  418.0924, found 418.0914.



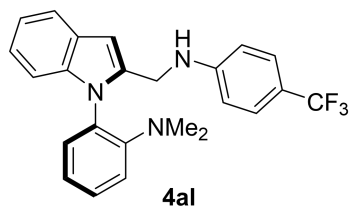

*N,N*-Dimethyl-2-(2-(((4-(trifluoromethyl)phenyl)amino)methyl)-1*H*-indol-1-yl)aniline **4al** was obtained as a yellow solid in 86% yield (35.2 mg) and 83% ee.  $R_f = 0.40$  (petroleum ether/ethyl acetate = 12:1); m.p. 53-54 °C. The ee value was determined by chiral stationary phase HPLC analysis [Daicel Chiralpak AD-H, isopropanol/hexane (20:80), 1.0 mL/min,  $\lambda = 254$  nm,  $t_r$  (major) = 8.65 min,  $t_r$  (minor) = 14.18 min].  $[\alpha]_D^{20} = -37.7$  ( $c = 0.60$ , EtOAc);  $^1\text{H}$  NMR (400 MHz,  $\text{CDCl}_3$ ):  $\delta$  7.63-7.51 (m, 1H), 7.44-7.28 (m, 3H), 7.19 (d,  $J = 8.4$  Hz, 1H), 7.17-6.96 (m, 5H), 6.58 (s, 1H), 6.54 (d,  $J = 8.0$  Hz, 2H), 4.66 (s, br., 1H), 4.44-4.13 (m, 2H), 2.43 (s, 6H);  $^{13}\text{C}$  NMR (100 MHz,  $\text{CDCl}_3$ ):  $\delta$  150.4, 150.2, 138.4, 138.2, 130.8, 129.5, 128.6, 128.1, 126.5 (q,  $J = 3.8$  Hz), 125.0 (q,  $J = 268.4$  Hz), 122.1, 121.8, 120.3, 118.9 (q,  $J = 32.4$  Hz), 118.8, 112.2, 111.8, 110.3, 102.0, 42.5, 40.5;  $^{19}\text{F}$  NMR (376 MHz,  $\text{CDCl}_3$ )  $\delta$  -60.91; HRMS (ESI) calcd for  $\text{C}_{24}\text{H}_{21}\text{F}_3\text{N}_3$  (M-H) $^-$  408.1693, found 408.1649.

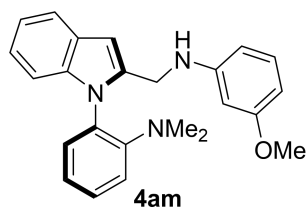

2-(2-(((3-Methoxyphenyl)amino)methyl)-1*H*-indol-1-yl)-*N,N*-dimethylaniline **4am** was obtained as a yellowish oil in 90% yield (33.4 mg) and 80% ee.  $R_f = 0.30$  (petroleum ether/ethyl acetate = 12:1). The ee value was determined by chiral stationary phase HPLC analysis [Daicel Chiralpak OD-H, isopropanol/hexane (20:80), 1.0 mL/min,  $\lambda = 254$  nm,  $t_r$  (major) = 9.13 min,  $t_r$  (minor) = 10.92 min].  $[\alpha]_D^{20} = -40.2$  ( $c = 0.60$ , EtOAc);  $^1\text{H}$  NMR (600 MHz,  $\text{CDCl}_3$ ):  $\delta$  7.59-7.51 (m, 1H), 7.39-7.33 (m, 1H), 7.19 (d,  $J = 7.8$  Hz, 1H), 7.14-7.05 (m, 4H), 7.05-6.96 (m, 2H), 6.59 (s, 1H), 6.24 (d,  $J = 8.4$  Hz, 1H), 6.19 (d,  $J = 8.4$  Hz, 1H), 6.15 (d,  $J = 2.4$  Hz, 1H), 4.38 (s, br., 1H), 4.28 (d,  $J = 15.6$  Hz, 1H), 4.23 (d,  $J = 15.6$  Hz, 1H), 3.71 (s, 3H), 2.42 (s, 6H);  $^{13}\text{C}$  NMR (150 MHz,  $\text{CDCl}_3$ ):  $\delta$  160.8, 150.3, 149.3, 139.1, 138.3, 130.8, 129.9, 129.4, 128.6, 128.2, 121.8, 121.6, 120.2, 120.1, 118.7, 110.3, 106.5, 102.5, 101.8, 99.4, 55.1, 42.4, 40.9; HRMS (ESI) calcd for  $\text{C}_{24}\text{H}_{24}\text{N}_3\text{O}$  (M-H) $^-$  370.1925, found 370.2021.

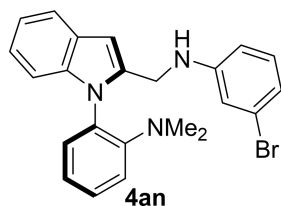

2-(2-(((3-Bromophenyl)amino)methyl)-1*H*-indol-1-yl)-*N,N*-dimethylaniline **4an** was obtained as a yellowish oil in 86% yield (36.0 mg) and 79% ee.  $R_f = 0.40$  (petroleum ether/ethyl acetate = 12:1). The ee value was determined by chiral stationary phase HPLC analysis [Daicel Chiralpak OD-H, isopropanol/hexane (10:90), 1.0 mL/min,  $\lambda = 254$  nm,  $t_r$  (major) = 8.71 min,  $t_r$  (minor) = 11.45 min].  $[\alpha]_D^{20} = -59.5$  ( $c = 0.60$ , EtOAc);  $^1\text{H NMR}$  (600 MHz,  $\text{CDCl}_3$ ):  $\delta$  7.60-7.52 (m, 1H), 7.42-7.32 (m, 1H), 7.20 (dd,  $J = 7.8, 1.8$  Hz, 1H), 7.16-7.01 (m, 5H), 6.94 (t,  $J = 7.8$  Hz, 1H), 6.76 (d,  $J = 7.8$  Hz, 1H), 6.69 (t,  $J = 1.8$  Hz, 1H), 6.56 (s, 1H), 6.47 (dd,  $J = 8.4, 2.4$  Hz, 1H), 4.43 (s, br., 1H), 4.29 (d,  $J = 15.6$  Hz, 1H), 4.21 (d,  $J = 15.6$  Hz, 1H), 2.44 (s, 6H);  $^{13}\text{C NMR}$  (150 MHz,  $\text{CDCl}_3$ ):  $\delta$  150.2, 149.2, 138.5, 138.3, 130.8, 130.4, 129.5, 128.7, 128.2, 123.3, 121.9, 121.8, 120.3, 120.2, 120.2, 118.8, 115.5, 112.0, 110.3, 101.8, 42.5, 40.8; HRMS (ESI) calcd for  $\text{C}_{23}\text{H}_{21}\text{BrN}_3$  (M-H) $^-$  418.0924, found 417.0880.

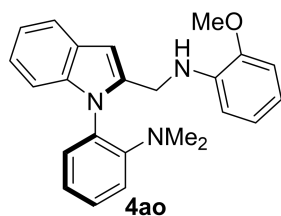

2-(2-(((2-Methoxyphenyl)amino)methyl)-1*H*-indol-1-yl)-*N,N*-dimethylaniline **4ao** was obtained as a yellowish oil in 88% yield (32.7 mg) and 65% ee.  $R_f = 0.30$  (petroleum ether/ethyl acetate = 10:1). The ee value was determined by chiral stationary phase HPLC analysis [Daicel Chiralpak AD-H, isopropanol/hexane (20:80), 1.0 mL/min,  $\lambda = 254$  nm,  $t_r$  (major) = 6.63 min,  $t_r$  (minor) = 7.51 min].  $[\alpha]_D^{20} = -24.8$  ( $c = 0.60$ , EtOAc);  $^1\text{H NMR}$  (600 MHz,  $\text{CDCl}_3$ ):  $\delta$  7.59-7.52 (m, 1H), 7.39-7.32 (m, 1H), 7.25-7.20 (m, 1H), 7.14-7.05 (m, 4H), 7.04-6.98 (m, 1H), 6.82-6.76 (m, 1H), 6.74 (d,  $J = 7.8$  Hz, 1H), 6.68-6.56 (m, 3H), 4.71 (s, br., 1H), 4.40 (d,  $J = 15.6$  Hz, 1H), 4.26 (d,  $J = 15.6$  Hz, 1H), 3.80 (s, 3H), 2.41 (s, 6H);  $^{13}\text{C NMR}$  (150 MHz,  $\text{CDCl}_3$ ):  $\delta$  150.3, 147.1, 139.4, 138.0, 137.8, 130.7, 129.2, 128.5, 128.3, 121.6, 121.3, 121.2, 120.1, 120.0, 118.6, 116.8, 110.5, 110.3, 109.5, 101.4, 55.4, 42.3, 40.6; HRMS (ESI) calcd for  $\text{C}_{24}\text{H}_{24}\text{N}_3\text{O}$  (M-H) $^-$  370.1925, found 370.1915.

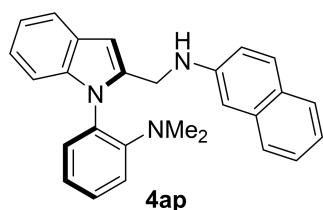

*N*-((1-(2-(Dimethylamino)phenyl)-1*H*-indol-2-yl)methyl)naphthalen-2-amine **4ap** was obtained as a yellowish oil in 89% yield (34.8 mg) and 72% ee.  $R_f = 0.40$  (petroleum ether/ethyl acetate = 12:1). The ee value was determined by chiral stationary phase HPLC analysis [Daicel Chiralpak OD-H, isopropanol/hexane (20:80), 1.0 mL/min,  $\lambda = 254$  nm,  $t_r$  (major) = 8.16 min,

$t_r$  (minor) = 10.39 min].  $[\alpha]_D^{20} = -33.0$  ( $c = 0.60$ , EtOAc);  $^1\text{H NMR}$  (600 MHz,  $\text{CDCl}_3$ ):  $\delta$  7.62 (d,  $J = 8.0$  Hz, 1H), 7.59-7.49 (m, 3H), 7.39-7.33 (m, 1H), 7.33-7.27 (m, 1H), 7.24-7.19 (m, 1H), 7.16 (d,  $J = 8.4$  Hz, 1H), 7.14-7.06 (m, 4H), 7.06-7.00 (m, 1H), 6.84-6.74 (m, 2H), 6.63 (s, 1H), 4.53 (s, br., 1H), 4.42-4.30 (m, 2H), 2.45 (s, 6H);  $^{13}\text{C NMR}$  (150 MHz,  $\text{CDCl}_3$ ):  $\delta$  150.3, 145.6, 138.9, 138.3, 135.2, 130.9, 129.5, 128.9, 128.7, 128.3, 127.7, 127.7, 126.3, 126.0, 122.1, 121.9, 121.7, 120.3, 120.2, 118.8, 118.1, 110.4, 105.1, 102.0, 42.6, 41.0; HRMS (ESI) calcd for  $\text{C}_{27}\text{H}_{24}\text{N}_3$  (M-H) $^-$  390.1976, found 390.1964.

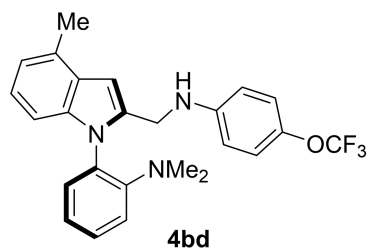

*N,N*-Dimethyl-2-(4-methyl-2-((4-(trifluoromethoxy)phenyl)amino)methyl)-1*H*-indol-1-yl)aniline **4bd** was obtained as a yellowish oil in 92% yield (40.4 mg) and 87% ee.  $R_f = 0.40$  (petroleum ether/ethyl acetate = 12:1). The ee value was determined by chiral stationary phase HPLC analysis [Daicel Chiralpak OD-H, isopropanol/hexane (10:90), 1.0 mL/min,  $\lambda = 254$  nm,  $t_r$  (major) = 6.04 min,  $t_r$  (minor) = 8.49 min].  $[\alpha]_D^{20} = -26.8$  ( $c = 0.60$ , EtOAc);  $^1\text{H NMR}$  (600 MHz,  $\text{CDCl}_3$ ):  $\delta$  7.40-7.32 (m, 1H), 7.18 (dd,  $J = 7.8, 1.8$  Hz, 1H), 7.10 (dd,  $J = 8.4, 1.2$  Hz, 1H), 7.07-7.00 (m, 2H), 6.97 (d,  $J = 7.8$  Hz, 1H), 6.94-6.88 (m, 2H), 6.60 (s, 1H), 6.97 (d,  $J = 7.8$  Hz, 1H), 6.50 (d,  $J = 9.0$  Hz, 2H), 4.42 (s, br., 1H), 4.27 (d,  $J = 15.6$  Hz, 1H), 4.24 (d,  $J = 15.6$  Hz, 1H), 2.55 (s, 3H), 2.43 (s, 6H);  $^{13}\text{C NMR}$  (150 MHz,  $\text{CDCl}_3$ ):  $\delta$  150.2, 146.7, 140.5, 138.1, 138.0, 130.8, 129.7, 129.4, 128.9, 128.0, 122.3, 122.1, 121.7, 120.8 (q,  $J = 253.7$  Hz), 120.5, 118.7, 113.4, 108.0, 100.5, 42.5, 41.2, 18.7;  $^{19}\text{F NMR}$  (565 MHz,  $\text{CDCl}_3$ )  $\delta$  -58.37; HRMS (ESI) calcd for  $\text{C}_{25}\text{H}_{23}\text{F}_3\text{N}_3\text{O}$  (M-H) $^-$  438.1799, found 438.1789.

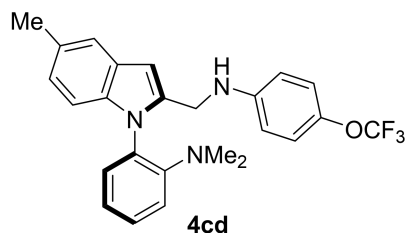

*N,N*-Dimethyl-2-(5-methyl-2-((4-(trifluoromethoxy)phenyl)amino)methyl)-1*H*-indol-1-yl)aniline **4cd** was obtained as a yellowish oil in 94% yield (41.3 mg) and 85% ee.  $R_f = 0.40$  (petroleum ether/ethyl acetate = 12:1). The ee value was determined by chiral stationary phase HPLC analysis [Daicel Chiralpak OD-H, isopropanol/hexane (10:90), 1.0 mL/min,  $\lambda = 254$  nm,  $t_r$  (major) = 5.20 min,  $t_r$  (minor) = 6.08 min].  $[\alpha]_D^{20} = -42.8$  ( $c = 0.60$ , EtOAc);  $^1\text{H NMR}$  (600 MHz,  $\text{CDCl}_3$ ):  $\delta$  7.42-7.30 (m, 2H), 7.17 (d,  $J = 7.8$  Hz, 1H), 7.10 (d,  $J = 7.8$  Hz, 1H), 7.03 (t,  $J = 7.8$  Hz, 1H), 7.00-6.88 (m, 4H), 6.50 (d,  $J = 3.0$  Hz, 2H), 6.48 (s, 1H), 4.43 (s, br., 1H),

4.26 (d,  $J = 15.6$  Hz, 1H), 4.22 (d,  $J = 15.6$  Hz, 1H), 2.43 (s, 9H);  $^{13}\text{C}$  NMR (150 MHz,  $\text{CDCl}_3$ ):  $\delta$  150.2, 146.7, 140.5, 138.6, 136.7, 130.7, 129.5, 129.3, 128.8, 128.4, 123.5, 122.3, 121.7, 120.8 (q,  $J = 253.9$  Hz), 120.0, 118.7, 113.4, 110.0, 101.5, 42.5, 41.2, 21.4;  $^{19}\text{F}$  NMR (565 MHz,  $\text{CDCl}_3$ )  $\delta$  -58.38; HRMS (ESI) calcd for  $\text{C}_{25}\text{H}_{23}\text{F}_3\text{N}_3\text{O}$  (M-H) $^-$  438.1799, found 438.1789.

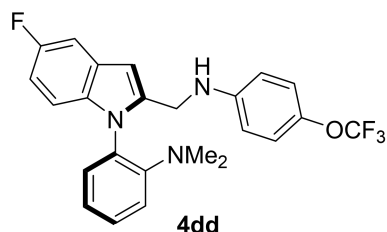

2-(5-Fluoro-2-(((4-(trifluoromethoxy)phenyl)amino)methyl)-1*H*-indol-1-yl)-*N,N*-dimethylaniline **4dd** was obtained as a yellowish oil in 95% yield (42.1 mg) and 89% ee.  $R_f = 0.40$  (petroleum ether/ethyl acetate = 12:1). The ee value was determined by chiral stationary phase HPLC analysis [Daicel Chiralpak OD-H, isopropanol/hexane (05:95), 1.0 mL/min,  $\lambda = 254$  nm,  $t_r$  (major) = 7.33 min,  $t_r$  (minor) = 7.95 min].  $[\alpha]_D^{20} = -26.5$  ( $c = 0.60$ , EtOAc);  $^1\text{H}$  NMR (600 MHz,  $\text{CDCl}_3$ ):  $\delta$  7.39 (t,  $J = 7.2$  Hz, 1H), 7.24-7.19 (m, 1H), 7.17 (d,  $J = 7.8$  Hz, 1H), 7.11 (d,  $J = 8.4$  Hz, 1H), 7.05 (t,  $J = 7.2$  Hz, 1H), 7.01-6.93 (m, 3H), 6.89-6.82 (m, 1H), 6.54 (s, 1H), 6.50 (d,  $J = 8.4$  Hz, 2H), 4.29 (d,  $J = 15.0$  Hz, 1H), 4.22 (d,  $J = 15.6$  Hz, 1H), 2.42 (s, 6H);  $^{13}\text{C}$  NMR (150 MHz,  $\text{CDCl}_3$ ):  $\delta$  158.3 (d,  $^1J_{\text{C-F}} = 233.1$  Hz), 150.1, 146.5, 140.6, 140.3, 134.8, 130.6, 129.6, 128.4, 128.3 (d,  $^3J_{\text{C-F}} = 10.2$  Hz), 122.3, 121.7, 120.7 (q,  $J = 256.7$  Hz), 118.8, 113.4, 110.9 (d,  $^3J_{\text{C-F}} = 9.6$  Hz), 110.1 (d,  $^2J_{\text{C-F}} = 26.0$  Hz), 105.1 (d,  $^2J_{\text{C-F}} = 23.4$  Hz), 101.8 (d,  $^4J_{\text{C-F}} = 4.5$  Hz), 42.4, 41.1;  $^{19}\text{F}$  NMR (565 MHz,  $\text{CDCl}_3$ )  $\delta$  -58.40, -124.41; HRMS (ESI) calcd for  $\text{C}_{24}\text{H}_{20}\text{F}_4\text{N}_3\text{O}$  (M-H) $^-$  442.1548, found 442.1536.

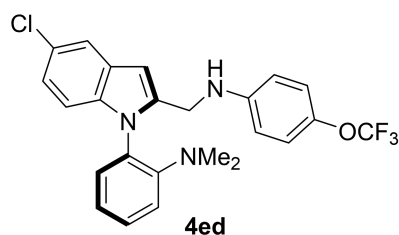

2-(5-Chloro-2-(((4-(trifluoromethoxy)phenyl)amino)methyl)-1*H*-indol-1-yl)-*N,N*-dimethylaniline **4ed** was obtained as a yellowish oil in 89% yield (40.9 mg) and 83% ee.  $R_f = 0.40$  (petroleum ether/ethyl acetate = 12:1). The ee value was determined by chiral stationary phase HPLC analysis [Daicel Chiralpak IC, isopropanol/hexane (10:90), 1.0 mL/min,  $\lambda = 254$  nm,  $t_r$  (major) = 5.86 min,  $t_r$  (minor) = 6.58 min].  $[\alpha]_D^{20} = -51.3$  ( $c = 0.60$ , EtOAc);  $^1\text{H}$  NMR (600 MHz,  $\text{CDCl}_3$ ):  $\delta$  7.52 (d,  $J = 1.8$  Hz, 1H), 7.42-7.34 (m, 1H), 7.16 (dd,  $J = 7.8, 1.8$  Hz, 1H), 7.11 (dd,  $J = 8.4, 1.2$  Hz, 1H), 7.09-7.02 (m, 2H), 7.01-6.94 (m, 3H), 6.51 (s, 1H), 6.49 (d,  $J = 9.0$  Hz, 2H), 4.34 (s, br., 1H), 4.29 (d,  $J = 15.6$  Hz, 1H), 4.22 (d,  $J = 15.6$  Hz, 1H), 2.41 (s, 6H);  $^{13}\text{C}$

NMR (150 MHz, CDCl<sub>3</sub>):  $\delta$  150.1, 146.5, 140.6, 140.1, 136.7, 130.5, 129.7, 129.1, 128.2, 125.9, 122.3, 122.2, 121.8, 120.7 (q,  $J = 253.8$  Hz), 119.7, 118.9, 113.3, 111.3, 101.4, 42.4, 41.1; <sup>19</sup>F NMR (565 MHz, CDCl<sub>3</sub>)  $\delta$  -58.37; HRMS (ESI) calcd for C<sub>24</sub>H<sub>20</sub>ClF<sub>3</sub>N<sub>3</sub>O (M-H)<sup>-</sup> 458.1252, found 458.1349.

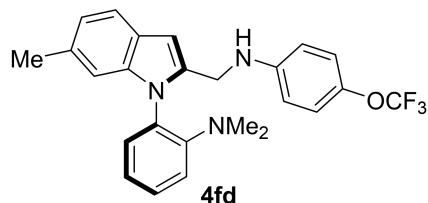

*N,N*-Dimethyl-2-(6-methyl-2-(((4-(trifluoromethoxy)phenyl)amino)methyl)-1*H*-indol-1-yl)aniline **4fd** was obtained as a yellowish oil in 94% yield (41.3 mg) and 89% ee.  $R_f = 0.40$  (petroleum ether/ethyl acetate = 12:1). The ee value was determined by chiral stationary phase HPLC analysis [Daicel Chiralpak OD-H, isopropanol/hexane (10:90), 1.0 mL/min,  $\lambda = 254$  nm,  $t_r$  (major) = 5.22 min,  $t_r$  (minor) = 6.14 min].  $[\alpha]_D^{20} = -41.3$  ( $c = 0.60$ , EtOAc); <sup>1</sup>H NMR (600 MHz, CDCl<sub>3</sub>):  $\delta$  7.45 (d,  $J = 8.4$  Hz, 1H), 7.40-7.34 (m, 1H), 7.20-7.16 (m, 1H), 7.10 (d,  $J = 7.8$  Hz, 1H), 7.07-7.02 (m, 1H), 6.99-6.91 (m, 3H), 6.88 (s, 1H), 6.52 (s, 1H), 6.48 (d,  $J = 9.0$  Hz, 2H), 4.25 (d,  $J = 15.6$  Hz, 1H), 4.21 (d,  $J = 15.6$  Hz, 1H), 2.43 (s, 6H), 2.38 (s, 3H); <sup>13</sup>C NMR (150 MHz, CDCl<sub>3</sub>):  $\delta$  150.2, 146.7, 140.5, 138.7, 137.9, 131.9, 130.8, 129.4, 128.7, 126.0, 122.3, 122.0, 121.6, 119.9 (q,  $J = 253.2$  Hz), 119.8, 118.7, 113.4, 110.2, 101.8, 42.5, 41.1, 21.8; <sup>19</sup>F NMR (565 MHz, CDCl<sub>3</sub>)  $\delta$  -58.39; HRMS (ESI) calcd for C<sub>25</sub>H<sub>23</sub>F<sub>3</sub>N<sub>3</sub>O (M-H)<sup>-</sup> 438.1799, found 438.1788.

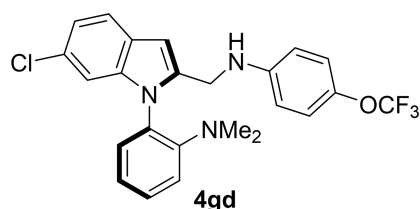

2-(6-Chloro-2-(((4-(trifluoromethoxy)phenyl)amino)methyl)-1*H*-indol-1-yl)-*N,N*-dimethylaniline **4gd** was obtained as a yellowish oil in 90% yield (41.3 mg) and 83% ee.  $R_f = 0.40$  (petroleum ether/ethyl acetate = 12:1). The ee value was determined by chiral stationary phase HPLC analysis [Daicel Chiralpak IC, isopropanol/hexane (10:90), 1.0 mL/min,  $\lambda = 254$  nm,  $t_r$  (major) = 5.87 min,  $t_r$  (minor) = 6.44 min].  $[\alpha]_D^{20} = -49.5$  ( $c = 0.60$ , EtOAc); <sup>1</sup>H NMR (600 MHz, CDCl<sub>3</sub>):  $\delta$  7.46 (d,  $J = 9.0$  Hz, 1H), 7.42-7.35 (m, 1H), 7.16 (dd,  $J = 7.8, 1.8$  Hz, 1H), 7.11 (dd,  $J = 8.4, 1.2$  Hz, 1H), 7.09-7.01 (m, 3H), 6.97 (d,  $J = 9.0$  Hz, 2H), 6.54 (s, 1H), 6.49 (d,  $J = 9.0$  Hz, 2H), 4.38 (s, br., 1H), 4.28 (d,  $J = 15.6$  Hz, 1H), 4.21 (d,  $J = 15.6$  Hz, 1H), 2.42 (s, 6H); <sup>13</sup>C NMR (150 MHz, CDCl<sub>3</sub>):  $\delta$  150.1, 146.5, 140.6, 139.5, 138.7, 130.5, 129.8, 128.0, 127.9, 126.7, 122.3, 121.9, 121.1, 120.9, 120.7 (q,  $J = 253.8$  Hz), 118.9, 113.4, 110.3, 101.9, 42.5,

41.0;  $^{19}\text{F}$  NMR (565 MHz,  $\text{CDCl}_3$ )  $\delta$  -58.37; HRMS (ESI) calcd for  $\text{C}_{24}\text{H}_{20}\text{ClF}_3\text{N}_3\text{O}$  (M-H) $^-$  458.1252, found 458.1349.

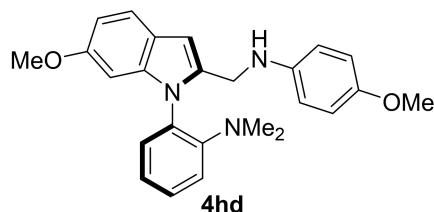

2-(6-Methoxy-2-(((4-methoxyphenyl)amino)methyl)-1*H*-indol-1-yl)-*N,N*-dimethylaniline **4hd** was obtained as a yellowish oil in 88% yield (35.3 mg) and 81% ee.  $R_f$  = 0.15 (petroleum ether/dichloromethane = 1:2). The ee value was determined by chiral stationary phase HPLC analysis [Daicel Chiralpak IC, isopropanol/hexane (50:50), 1.0 mL/min,  $\lambda$  = 254 nm,  $t_r$  (minor) = 6.60 min,  $t_r$  (major) = 7.72 min].  $[\alpha]_D^{20}$  = -44.7 ( $c$  = 1.00, EtOAc);  $^1\text{H}$  NMR (600 MHz,  $\text{CDCl}_3$ ):  $\delta$  7.43 (d,  $J$  = 9.0 Hz, 1H), 7.40-7.35 (m, 1H), 7.20 (dd,  $J$  = 7.8, 1.8 Hz, 1H), 7.13-7.09 (m, 1H), 7.07-7.02 (m, 1H), 6.77 (dd,  $J$  = 8.4, 2.4 Hz, 1H), 6.74-6.70 (m, 2H), 6.58-6.51 (m, 3H), 6.50 (s, 1H), 4.23-4.15 (m, 2H), 3.74 (s, 3H), 3.72 (s, 3H), 2.45 (s, 6H);  $^{13}\text{C}$  NMR (150 MHz,  $\text{CDCl}_3$ ):  $\delta$  156.3, 152.3, 150.1, 138.8, 138.0, 130.7, 129.3, 128.6, 122.4, 121.5, 120.7, 118.6, 114.8, 114.8, 114.7, 109.7, 101.8, 94.0, 55.8, 55.7, 42.4; HRMS (ESI) calcd for  $\text{C}_{25}\text{H}_{26}\text{N}_3\text{O}_2$  (M-H) $^-$  400.2031, found 400.2025.

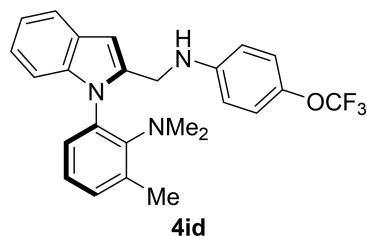

*N,N*, 2-Trimethyl-6-(2-(((4-(trifluoromethoxy)phenyl)amino)methyl)-1*H*-indol-1-yl)aniline **4id** was obtained as a yellowish oil in 85% yield (37.3 mg) and 20% ee.  $R_f$  = 0.40 (petroleum ether/ethyl acetate = 12:1). The ee value was determined by chiral stationary phase HPLC analysis [Daicel Chiralpak OD-H, isopropanol/hexane (10:90), 1.0 mL/min,  $\lambda$  = 254 nm,  $t_r$  (major) = 5.93 min,  $t_r$  (minor) = 9.38 min].  $^1\text{H}$  NMR (600 MHz,  $\text{CDCl}_3$ ):  $\delta$  7.62-7.54 (m, 1H), 7.28-7.23 (m, 1H), 7.12-7.08 (m, 2H), 7.04 (t,  $J$  = 7.2 Hz, 1H), 7.01-6.94 (m, 4H), 6.61 (s, 1H), 6.51 (d,  $J$  = 9.0 Hz, 2H), 4.29 (d,  $J$  = 15.6 Hz, 1H), 4.19 (d,  $J$  = 15.6 Hz, 1H), 3.95 (s, br., 1H), 2.40 (s, 6H), 2.37 (s, 3H);  $^{13}\text{C}$  NMR (150 MHz,  $\text{CDCl}_3$ ):  $\delta$  149.4, 146.4, 140.7, 139.2, 138.3, 136.6, 132.2, 132.1, 128.3, 127.8, 123.6, 122.4, 121.7, 120.7 (q,  $J$  = 253.1 Hz), 120.2, 120.0, 113.3, 110.8, 101.4, 42.3, 41.3, 19.8;  $^{19}\text{F}$  NMR (565 MHz,  $\text{CDCl}_3$ )  $\delta$  -58.42; HRMS (ESI) calcd for  $\text{C}_{25}\text{H}_{23}\text{F}_3\text{N}_3\text{O}$  (M-H) $^-$  438.1799, found 438.1790.

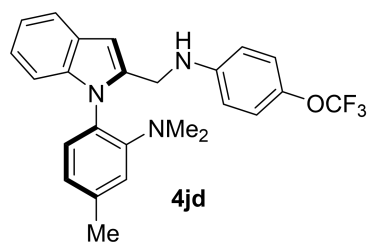

*N,N*, 4-Trimethyl-2-(2-(((4-(trifluoromethoxy)phenyl)amino)methyl)-1H-indol-1-yl)aniline **4jd** was obtained as a yellowish oil in 96% yield (42.2 mg) and 91% ee.  $R_f = 0.40$  (petroleum ether/ethyl acetate = 12:1). The ee value was determined by chiral stationary phase HPLC analysis [Daicel Chiralpak OD-H, isopropanol/hexane (10:90), 1.0 mL/min,  $\lambda = 254$  nm,  $t_r$  (major) = 5.78 min,  $t_r$  (minor) = 7.00 min].  $[\alpha]_D^{20} = -54.4$  ( $c = 1.00$ , EtOAc);  $^1\text{H NMR}$  (600 MHz,  $\text{CDCl}_3$ ):  $\delta$  7.62-7.51 (m, 1H), 7.16-7.02 (m, 4H), 6.97 (d,  $J = 8.4$  Hz, 2H), 6.90 (s, 1H), 6.88-6.82 (m, 1H), 6.57 (s, 1H), 6.50 (d,  $J = 9.0$  Hz, 2H), 4.46 (s, br., 1H), 4.26 (d,  $J = 15.0$  Hz, 1H), 4.23 (d,  $J = 15.6$  Hz, 1H), 2.41 (s, 9H);  $^{13}\text{C NMR}$  (150 MHz,  $\text{CDCl}_3$ ):  $\delta$  149.8, 146.7, 140.5, 139.5, 138.7, 138.4, 130.5, 128.1, 126.1, 122.5, 122.3, 121.9, 120.8 (q,  $J = 253.6$  Hz), 120.2, 120.1, 119.5, 113.3, 110.4, 101.8, 42.5, 41.1, 21.6;  $^{19}\text{F NMR}$  (565 MHz,  $\text{CDCl}_3$ )  $\delta$  -58.37; HRMS (ESI) calcd for  $\text{C}_{25}\text{H}_{23}\text{F}_3\text{N}_3\text{O}$  (M-H) $^-$  438.1799, found 438.1789.

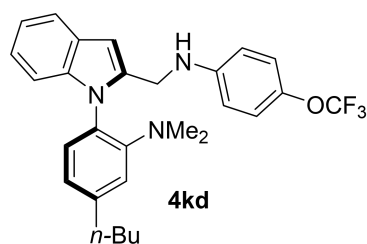

5-Butyl-*N,N*-dimethyl-2-(2-(((4-(trifluoromethoxy)phenyl)amino)methyl)-1H-indol-1-yl)aniline **4kd** was obtained as a yellowish oil in 93% yield (44.8 mg) and 89% ee.  $R_f = 0.40$  (petroleum ether/ethyl acetate = 12:1). The ee value was determined by chiral stationary phase HPLC analysis [Daicel Chiralpak IC, isopropanol/hexane (10:90), 1.0 mL/min,  $\lambda = 254$  nm,  $t_r$  (major) = 4.97 min,  $t_r$  (minor) = 5.65 min].  $[\alpha]_D^{20} = -44.0$  ( $c = 0.60$ , EtOAc);  $^1\text{H NMR}$  (400 MHz,  $\text{CDCl}_3$ ):  $\delta$  7.63-7.50 (m, 1H), 7.16-7.04 (m, 4H), 6.96 (d,  $J = 8.4$  Hz, 2H), 6.90 (s, 1H), 6.89-6.80 (m, 1H), 6.56 (s, 1H), 6.50 (d,  $J = 8.8$  Hz, 2H), 4.32-4.19 (m, 2H), 2.66 (t,  $J = 8.0$  Hz, 2H), 2.42 (s, 6H), 1.74-1.60 (m, 2H), 1.48-1.36 (m, 2H), 0.97 (t,  $J = 7.2$  Hz, 3H);  $^{13}\text{C NMR}$  (100 MHz,  $\text{CDCl}_3$ ):  $\delta$  149.8, 146.7, 144.5, 140.5, 138.7, 138.4, 130.4, 128.1, 126.2, 122.3, 121.8, 121.7, 120.8 (q,  $J = 253.5$  Hz), 120.2, 120.1, 118.7, 113.4, 110.4, 101.8, 42.5, 41.1, 35.9, 33.6, 22.6, 14.0;  $^{19}\text{F NMR}$  (376 MHz,  $\text{CDCl}_3$ )  $\delta$  -58.38; HRMS (ESI) calcd for  $\text{C}_{28}\text{H}_{29}\text{F}_3\text{N}_3\text{O}$  (M-H) $^-$  480.2268, found 480.2254.

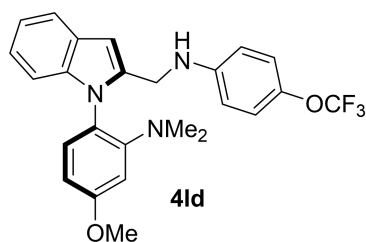

5-Methoxy-*N,N*-dimethyl-2-(2-(((4-(trifluoromethoxy)phenyl)amino)methyl)-1*H*-indol-1-yl)aniline **4ld** was obtained as a yellowish oil in 90% yield (41.0 mg) and 80% ee.  $R_f = 0.30$  (petroleum ether/ethyl acetate = 12:1). The ee value was determined by chiral stationary phase HPLC analysis [Daicel Chiralpak OD-H, isopropanol/hexane (10:90), 1.0 mL/min,  $\lambda = 254$  nm,  $t_r$  (major) = 8.65 min,  $t_r$  (minor) = 9.95 min].  $[\alpha]_D^{20} = -34.0$  ( $c = 0.60$ , EtOAc);  $^1\text{H NMR}$  (600 MHz,  $\text{CDCl}_3$ ):  $\delta$  7.57 (d,  $J = 7.2$  Hz, 1H), 7.17-7.03 (m, 4H), 6.97 (d,  $J = 8.4$  Hz, 2H), 6.63 (d,  $J = 2.4$  Hz, 1H), 6.59-6.54 (m, 2H), 6.51 (d,  $J = 9.0$  Hz, 2H), 4.29-4.18 (m, 2H), 3.86 (s, 3H), 2.41 (s, 6H);  $^{13}\text{C NMR}$  (150 MHz,  $\text{CDCl}_3$ ):  $\delta$  160.3, 151.3, 146.6, 140.5, 138.8, 138.6, 131.6, 128.0, 122.3, 121.9, 121.5, 120.7 (q,  $J = 253.5$  Hz), 120.2, 120.1, 113.4, 110.4, 105.6, 105.3, 101.7, 55.5, 42.4, 41.0;  $^{19}\text{F NMR}$  (565 MHz,  $\text{CDCl}_3$ )  $\delta$  -58.39; HRMS (ESI) calcd for  $\text{C}_{25}\text{H}_{23}\text{F}_3\text{N}_3\text{O}_2$  (M-H) $^-$  454.1748, found 454.1735.

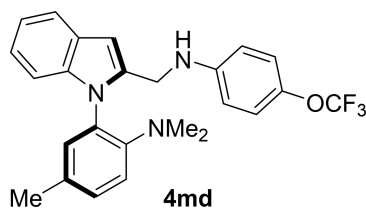

*N,N*, 4-Trimethyl-2-(2-(((4-(trifluoromethoxy)phenyl)amino)methyl)-1*H*-indol-1-yl)aniline **4md** was obtained as a yellow solid in 94% yield (41.3 mg) and 91% ee.  $R_f = 0.40$  (petroleum ether/ethyl acetate = 12:1); m.p. 73-74 °C. The ee value was determined by chiral stationary phase HPLC analysis [Daicel Chiralpak OD-H, isopropanol/hexane (10:90), 1.0 mL/min,  $\lambda = 254$  nm,  $t_r$  (major) = 6.18 min,  $t_r$  (minor) = 7.23 min].  $[\alpha]_D^{20} = -25.0$  ( $c = 0.60$ , EtOAc);  $^1\text{H NMR}$  (600 MHz,  $\text{CDCl}_3$ ):  $\delta$  7.62-7.51 (m, 1H), 7.18 (dd,  $J = 8.4, 2.4$  Hz, 1H), 7.15-7.06 (m, 3H), 7.04-6.98 (m, 2H), 6.96 (d,  $J = 7.8$  Hz, 2H), 6.57 (d,  $J = 1.2$  Hz, 1H), 6.52-6.44 (m, 2H), 4.30-4.21 (m, 2H), 2.40 (s, 6H), 2.29 (s, 3H);  $^{13}\text{C NMR}$  (150 MHz,  $\text{CDCl}_3$ ):  $\delta$  147.8, 146.8, 140.5, 138.7, 138.4, 131.7, 131.2, 130.0, 128.9, 128.2, 122.3, 121.9, 120.8 (q,  $J = 253.5$  Hz), 120.3, 120.2, 118.8, 113.4, 110.4, 101.9, 42.8, 41.1, 20.3;  $^{19}\text{F NMR}$  (565 MHz,  $\text{CDCl}_3$ )  $\delta$  -58.34; HRMS (ESI) calcd for  $\text{C}_{25}\text{H}_{23}\text{F}_3\text{N}_3\text{O}$  (M-H) $^-$  438.1799, found 438.1784.

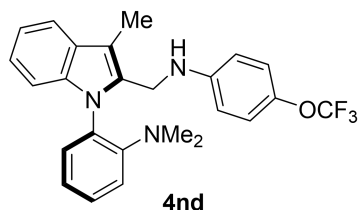



*N,N*-Dimethyl-2-(3-methyl-2-(((4-(trifluoromethoxy)phenyl)amino)methyl)-1*H*-indol-1-yl)aniline **4nd** was obtained as a yellowish oil in 87% yield (38.2 mg) and 2% ee.  $R_f = 0.40$  (petroleum ether/ethyl acetate = 12:1). The ee value was determined by chiral stationary phase HPLC analysis [Daicel Chiralpak AD-H, isopropanol/hexane (10:90), 1.0 mL/min,  $\lambda = 254$  nm,  $t_r$  (major) = 4.33 min,  $t_r$  (minor) = 4.95 min].  $^1\text{H NMR}$  (600 MHz,  $\text{CDCl}_3$ ):  $\delta$  7.62-7.55 (m, 1H), 7.39-7.31 (m, 1H), 7.18-7.11 (m, 3H), 7.08 (d,  $J = 8.4$  Hz, 1H), 7.06-7.00 (m, 2H), 6.95 (d,  $J = 8.4$  Hz, 2H), 6.44 (d,  $J = 8.4$  Hz, 2H), 4.44 (s, br., 1H), 4.32 (d,  $J = 13.8$  Hz, 1H), 4.04 (d,  $J = 13.8$  Hz, 1H), 2.41 (s, 6H), 2.40 (s, 3H);  $^{13}\text{C NMR}$  (150 MHz,  $\text{CDCl}_3$ ):  $\delta$  150.4, 146.9, 140.4, 137.6, 133.8, 131.1, 129.4, 129.2, 128.8, 122.3, 122.3, 121.9, 120.7 (q,  $J = 253.7$  Hz), 119.6, 118.7, 118.6, 113.3, 110.6, 110.3, 42.7, 39.0, 9.1;  $^{19}\text{F NMR}$  (565 MHz,  $\text{CDCl}_3$ )  $\delta$  -58.41; HRMS (ESI) calcd for  $\text{C}_{25}\text{H}_{23}\text{F}_3\text{N}_3\text{O}$  (M-H) $^-$  438.1799, found 438.1795.

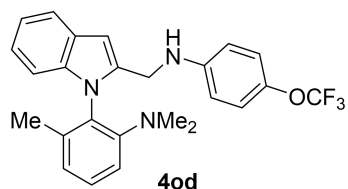

*N,N*, 3-Trimethyl-2-(2-(((4-(trifluoromethoxy)phenyl)amino)methyl)-1*H*-indol-1-yl)aniline **4od** was obtained as a yellowish oil in 52% yield (22.8 mg) and 2% ee.  $R_f = 0.40$  (petroleum ether/ethyl acetate = 12:1). The ee value was determined by chiral stationary phase HPLC analysis [Daicel Chiralpak OD-H, isopropanol/hexane (02:98), 1.0 mL/min,  $\lambda = 254$  nm].  $^1\text{H NMR}$  (600 MHz,  $\text{CDCl}_3$ ):  $\delta$  7.54-7.48 (m, 1H), 7.21 (t,  $J = 8.4$  Hz, 1H), 7.07-6.99 (m, 2H), 6.91-6.85 (m, 4H), 6.84-6.78 (m, 1H), 6.52 (s, 1H), 6.45-6.35 (m, 2H), 4.40 (s, br., 1H), 4.12 (d,  $J = 15.6$  Hz, 1H), 4.02 (d,  $J = 15.0$  Hz, 1H), 2.35 (s, 6H), 1.64 (s, 3H);  $^{13}\text{C NMR}$  (150 MHz,  $\text{CDCl}_3$ ):  $\delta$  151.2, 146.7, 140.4, 139.3, 137.8, 137.7, 129.3, 128.2, 128.1, 124.0, 122.3, 122.1, 120.5, 120.0, 120.7 (q,  $J = 253.6$  Hz), 116.5, 113.2, 110.4, 102.0, 43.3, 41.0, 17.8;  $^{19}\text{F NMR}$  (565 MHz,  $\text{CDCl}_3$ )  $\delta$  -58.39; HRMS (ESI) calcd for  $\text{C}_{25}\text{H}_{23}\text{F}_3\text{N}_3\text{O}$  (M-H) $^-$  438.1799, found 438.1795.

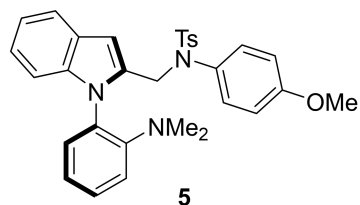

*N*-((1-(2-(Dimethylamino)phenyl)-1*H*-indol-2-yl)methyl)-*N*-(4-methoxyphenyl)-4-methylbenzenesulfonamide **5** was obtained as a yellowish oil in 93% yield (48.8 mg) and 88% ee.  $R_f = 0.30$  (petroleum ether/ethyl acetate = 5:1). The ee value was determined by chiral stationary phase HPLC analysis [Daicel Chiralpak OD-H, isopropanol/hexane (20:80), 1.0 mL/min,  $\lambda = 254$  nm,  $t_r$  (major) = 7.31 min,  $t_r$  (minor) = 8.40 min].  $[\alpha]_D^{20} = 117.0$  ( $c = 1.00$ , EtOAc);  $^1\text{H NMR}$

(600 MHz, CDCl<sub>3</sub>): δ 7.55-7.49 (m, 1H), 7.38 (d, *J* = 7.8 Hz, 2H), 7.37-7.33 (m, 1H), 7.18 (d, *J* = 8.4 Hz, 2H), 7.10-7.01 (m, 4H), 7.00-6.93 (m, 2H), 6.80-6.72 (m, 2H), 6.67-6.59 (m, 2H), 6.54 (s, 1H), 4.81 (d, *J* = 15.6 Hz, 1H), 4.76 (d, *J* = 15.0 Hz, 1H), 3.72 (s, 3H), 2.39 (s, 3H), 2.29 (s, 6H); <sup>13</sup>C NMR (150 MHz, CDCl<sub>3</sub>): δ 158.7, 149.8, 143.2, 137.8, 135.8, 135.4, 131.7, 130.5, 129.8, 129.3, 129.0, 128.2, 128.1, 127.8, 121.8, 121.1, 120.2, 120.0, 118.6, 113.8, 110.2, 103.8, 55.3, 47.6, 41.9, 21.6; HRMS (ESI) calcd for C<sub>31</sub>H<sub>31</sub>N<sub>3</sub>O<sub>3</sub>S (M-H)<sup>-</sup> 525.2092, found 525.2054.

### The Absolute Stereochemistry Discussion

In order to confirm the absolute configuration (AC) of compounds **4**, the ECD spectra were calculated by the TD-DFT method, which has been proven to be useful in predicting ECD spectra and assigning the AC of organic molecules.<sup>S1</sup> Gaussian 09 package of programs is applied for theoretical calculation.<sup>S2</sup> Geometries optimization and the Gibbs energy calculations were performed at the level of b3lyp/6-311+g(2d,p)//b3lyp/6-311++g(3df,2p). Calculations of ECD were performed based on the optimized conformations, and then the ECD spectra was obtained by Multiwfn.<sup>S3</sup> As shown in Figure S1, the simulated spectra are in good agreement with the experimental spectral data, and the *R<sub>a</sub>* configuration could be reliably assigned to compound **4aa** (sample concentration: 1.88 × 10<sup>-4</sup> mol/L in *i*-PrOH).

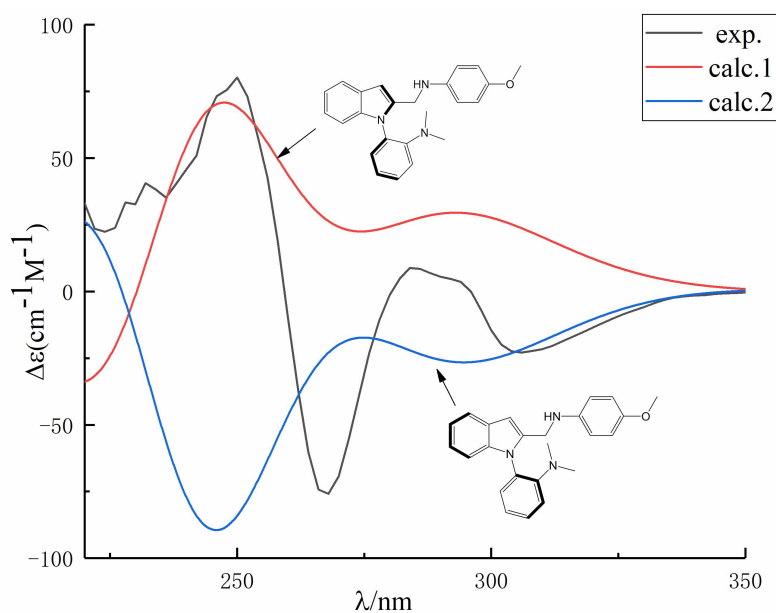

**Figure S1.** Experimental ECD spectra (black line) and simulated spectra (red line) proving *R<sub>a</sub>*-conformer **4aa** absolute configuration.

S1. N. Berova, L. D. Bari, G. Pescitelli, Application of electronic circular dichroism in configurational and conformational analysis of organic compounds. *Chem. Soc. Rev.*, **2007**, 36, 914-931.

S2. M. Frisch, G. Trucks, H. Schlegel, G. Scuseria, M. Robb, J. Cheeseman, G. Scalmani, V. Barone, B. Mennucci, G. Petersson, *Gaussian, 09, Revision A.02*, Gaussian, Inc., Wallingford CT, 2009 (2015).

S3. T. Lu, F. Chen, Multiwfn: a multifunctional wavefunction analyzer. *J. Comput. Chem.*, **2012**, 33, 580-592.

In order to obtain accurate ECD spectra, 9 major conformations are identified by configuration analysis and optimization. All cartesian coordinates of Gaussian optimized structures for the 9 conformations and the corresponding gibbs free energies are listed in Table S3. The Boltzmann average spectra of ECD is shown in Fig. S1. In addition, solvent corrections are carried out in the calculations.

**Table S3.** Optimized geometries labeled with Gibbs free energies (Hartree) and cartesian coordinates for the 9 conformations (named as P1~P9, P1, P3, P7 and P8 are  $S_a$ -conformer of **4aa**, P2, P4, P5, P6 and P9 are  $R_a$ -conformer of **4aa**).

| conformations                                                                                            | cartesian coordinates |         |         |         |
|----------------------------------------------------------------------------------------------------------|-----------------------|---------|---------|---------|
| P1<br>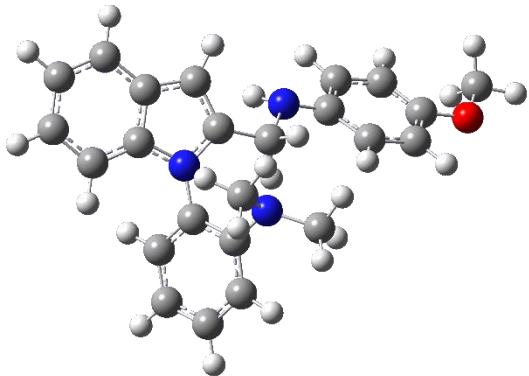<br>-1169.009596 | C                     | -3.0259 | -5.1231 | -0.5262 |
|                                                                                                          | C                     | -3.9668 | -4.2472 | 0.0023  |
|                                                                                                          | C                     | -3.6434 | -2.9093 | 0.2475  |
|                                                                                                          | C                     | -2.335  | -2.4675 | -0.0373 |
|                                                                                                          | C                     | -1.388  | -3.3335 | -0.5895 |
|                                                                                                          | C                     | -1.7363 | -4.6778 | -0.8294 |
|                                                                                                          | N                     | -1.7443 | -1.2028 | 0.062   |
|                                                                                                          | C                     | -0.2064 | -2.5864 | -0.7972 |
|                                                                                                          | C                     | -0.4223 | -1.293  | -0.3579 |
|                                                                                                          | C                     | 0.5572  | -0.1602 | -0.2852 |
|                                                                                                          | N                     | 1.9036  | -0.6208 | 0.0595  |
|                                                                                                          | C                     | 2.9386  | 0.2915  | 0.2636  |
|                                                                                                          | C                     | 2.9131  | 1.6149  | -0.1824 |
|                                                                                                          | C                     | 4.1367  | -0.1784 | 0.8206  |
|                                                                                                          | C                     | 4.0228  | 2.4541  | -0.0171 |
|                                                                                                          | C                     | 5.2524  | 0.6541  | 0.9825  |
|                                                                                                          | C                     | 5.1979  | 1.98    | 0.5647  |
|                                                                                                          | O                     | 6.207   | 2.8976  | 0.6573  |
|                                                                                                          | C                     | 7.454   | 2.4287  | 1.155   |
|                                                                                                          | C                     | -2.4036 | -0.0389 | 0.5563  |
|                                                                                                          | C                     | -2.9759 | -0.1221 | 1.8392  |
|                                                                                                          | C                     | -2.4429 | 1.1642  | -0.1909 |
|                                                                                                          | C                     | -3.581  | 0.9935  | 2.409   |
|                                                                                                          | C                     | -3.0592 | 2.2709  | 0.4226  |
|                                                                                                          | C                     | -3.6193 | 2.1895  | 1.7028  |
|                                                                                                          | N                     | -1.9498 | 1.2349  | -1.5103 |
|                                                                                                          | C                     | -2.8338 | 0.5601  | -2.4722 |
|                                                                                                          | C                     | -1.4591 | 2.5324  | -1.9779 |
| H                                                                                                        | -3.2951               | -6.159  | -0.7158 |         |
| H                                                                                                        | -4.9713               | -4.6028 | 0.2195  |         |
| H                                                                                                        | -4.3985               | -2.2317 | 0.634   |         |
| H                                                                                                        | -1.0091               | -5.3632 | -1.2551 |         |
| H                                                                                                        | 0.7282                | -2.9542 | -1.2022 |         |

|    |   |         |         |         |
|----|---|---------|---------|---------|
|    | H | 0.5868  | 0.326   | -1.2665 |
|    | H | 0.243   | 0.5723  | 0.466   |
|    | H | 1.8808  | -1.3424 | 0.7741  |
|    | H | 2.0329  | 2.0265  | -0.6658 |
|    | H | 4.2149  | -1.2179 | 1.131   |
|    | H | 3.9707  | 3.4842  | -0.3602 |
|    | H | 6.1437  | 0.2278  | 1.4289  |
|    | H | 8.1587  | 3.2657  | 1.1334  |
|    | H | 7.8609  | 1.6352  | 0.5192  |
|    | H | 7.3641  | 2.0961  | 2.1943  |
|    | H | -2.9181 | -1.042  | 2.4175  |
|    | H | -4.0112 | 0.9326  | 3.4051  |
|    | H | -3.1444 | 3.2196  | -0.0992 |
|    | H | -4.092  | 3.0646  | 2.1417  |
|    | H | -2.3299 | 0.4769  | -3.4416 |
|    | H | -3.7596 | 1.1289  | -2.6175 |
|    | H | -3.0995 | -0.456  | -2.1665 |
|    | H | -0.7869 | 2.9901  | -1.2436 |
|    | H | -0.8799 | 2.3943  | -2.8978 |
|    | H | -2.2792 | 3.2233  | -2.2025 |
| P2 | C | -3.8765 | -4.3201 | 2.0777  |
|    | C | -4.6018 | -3.4804 | 1.2387  |
|    | C | -3.9596 | -2.5075 | 0.4676  |
|    | C | -2.5581 | -2.4032 | 0.5545  |
|    | C | -1.8165 | -3.2327 | 1.3998  |
|    | C | -2.4858 | -4.206  | 2.167   |
|    | N | -1.6666 | -1.511  | -0.04   |
|    | C | -0.4567 | -2.8601 | 1.2672  |
|    | C | -0.3756 | -1.8269 | 0.3535  |
|    | C | 0.8474  | -1.1569 | -0.1882 |
|    | N | 1.4036  | -0.1919 | 0.7471  |
|    | C | 2.5258  | 0.5628  | 0.3968  |
|    | C | 3.3742  | 0.2604  | -0.6731 |
|    | C | 2.9057  | 1.6126  | 1.2421  |
|    | C | 4.5228  | 1.0232  | -0.9359 |
|    | C | 4.0531  | 2.3722  | 0.99    |
|    | C | 4.8646  | 2.0875  | -0.1061 |
|    | O | 5.9524  | 2.9035  | -0.2457 |
|    | C | 6.8034  | 2.6531  | -1.3571 |
|    | C | -2.0364 | -0.4872 | -0.9497 |
|    | C | -2.5827 | -0.9102 | -2.1763 |
|    | C | -1.7858 | 0.8785  | -0.6669 |
|    | C | -2.8599 | 0.0205  | -3.1699 |
|    | C | -2.0671 | 1.7823  | -1.7098 |

P2

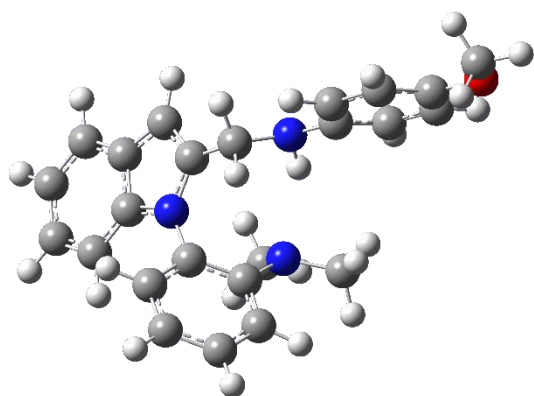

-1169.009957

|    |   |         |         |         |
|----|---|---------|---------|---------|
|    | C | -2.594  | 1.3644  | -2.9396 |
|    | N | -1.3348 | 1.3273  | 0.5937  |
|    | C | -2.2452 | 0.9808  | 1.6989  |
|    | C | -0.7602 | 2.6714  | 0.6864  |
|    | H | -4.3932 | -5.0674 | 2.6745  |
|    | H | -5.684  | -3.5749 | 1.1873  |
|    | H | -4.5374 | -1.8418 | -0.1668 |
|    | H | -1.9264 | -4.8601 | 2.83    |
|    | H | 0.3893  | -3.3101 | 1.7722  |
|    | H | 1.5877  | -1.9443 | -0.3824 |
|    | H | 0.6403  | -0.6802 | -1.1532 |
|    | H | 0.6495  | 0.4062  | 1.0953  |
|    | H | 3.1607  | -0.5715 | -1.337  |
|    | H | 2.3088  | 1.8401  | 2.1217  |
|    | H | 5.1283  | 0.7473  | -1.7923 |
|    | H | 4.319   | 3.183   | 1.6629  |
|    | H | 7.6156  | 3.386   | -1.3281 |
|    | H | 7.2528  | 1.6565  | -1.2946 |
|    | H | 6.2676  | 2.7873  | -2.3026 |
|    | H | -2.753  | -1.9665 | -2.3753 |
|    | H | -3.2655 | -0.3017 | -4.1251 |
|    | H | -1.9113 | 2.8495  | -1.5815 |
|    | H | -2.8026 | 2.0995  | -3.713  |
|    | H | -2.2611 | 1.7702  | 2.4596  |
|    | H | -3.2803 | 0.8436  | 1.3635  |
|    | H | -1.9043 | 0.0715  | 2.2017  |
|    | H | -0.2622 | 2.793   | 1.6551  |
|    | H | 0.0028  | 2.8323  | -0.0829 |
|    | H | -1.5313 | 3.4459  | 0.6089  |
| P3 | C | -4.0378 | 3.9237  | 2.6986  |
|    | C | -4.6913 | 3.2799  | 1.653   |
|    | C | -3.9915 | 2.451   | 0.7716  |
|    | C | -2.6053 | 2.2911  | 0.9611  |
|    | C | -1.9366 | 2.9235  | 2.0125  |
|    | C | -2.6632 | 3.7528  | 2.8891  |
|    | N | -1.672  | 1.5026  | 0.2883  |
|    | C | -0.5746 | 2.5453  | 1.9323  |
|    | C | -0.4192 | 1.7059  | 0.8459  |
|    | C | 0.8449  | 1.1294  | 0.291   |
|    | N | 1.3384  | 0.0168  | 1.0881  |
|    | C | 2.4973  | -0.6625 | 0.7035  |
|    | C | 2.813   | -1.8577 | 1.3613  |
|    | C | 3.4379  | -0.1604 | -0.2019 |
|    | C | 3.9898  | -2.5583 | 1.0747  |

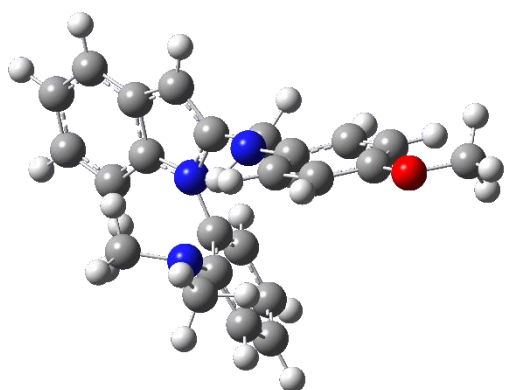

-1169.009994

|  |   |         |         |         |
|--|---|---------|---------|---------|
|  | C | 4.6172  | -0.8613 | -0.4985 |
|  | C | 4.8954  | -2.0687 | 0.1358  |
|  | O | 6.003   | -2.8462 | -0.0579 |
|  | C | 6.9471  | -2.3892 | -1.0181 |
|  | C | -1.9692 | 0.6739  | -0.8247 |
|  | C | -2.4213 | 1.3254  | -1.9877 |
|  | C | -1.7454 | -0.7249 | -0.7838 |
|  | C | -2.6291 | 0.599   | -3.1538 |
|  | C | -1.9534 | -1.4159 | -1.9931 |
|  | C | -2.3875 | -0.7691 | -3.1582 |
|  | N | -1.3906 | -1.406  | 0.3994  |
|  | C | -2.3708 | -1.2536 | 1.4879  |
|  | C | -0.8141 | -2.7469 | 0.2864  |
|  | H | -4.599  | 4.5602  | 3.378   |
|  | H | -5.7625 | 3.4153  | 1.523   |
|  | H | -4.5159 | 1.935   | -0.0273 |
|  | H | -2.1605 | 4.2529  | 3.7122  |
|  | H | 0.2262  | 2.8685  | 2.5862  |
|  | H | 0.7159  | 0.8235  | -0.7533 |
|  | H | 1.5899  | 1.9361  | 0.2894  |
|  | H | 0.568   | -0.6327 | 1.2636  |
|  | H | 2.1411  | -2.2502 | 2.1203  |
|  | H | 3.2764  | 0.7868  | -0.707  |
|  | H | 4.2038  | -3.486  | 1.5986  |
|  | H | 5.2963  | -0.425  | -1.2228 |
|  | H | 6.4994  | -2.3315 | -2.0159 |
|  | H | 7.761   | -3.1194 | -1.0608 |
|  | H | 7.3786  | -1.4274 | -0.7216 |
|  | H | -2.5726 | 2.4031  | -1.9994 |
|  | H | -2.9628 | 1.099   | -4.0589 |
|  | H | -1.813  | -2.4913 | -2.0526 |
|  | H | -2.5436 | -1.3452 | -4.0669 |
|  | H | -2.5105 | -2.1972 | 2.0285  |
|  | H | -3.3608 | -0.9483 | 1.1281  |
|  | H | -2.0116 | -0.5214 | 2.2169  |
|  | H | -1.5708 | -3.489  | 0.0088  |
|  | H | 0.0058  | -2.7676 | -0.4399 |
|  | H | -0.3901 | -3.0481 | 1.251   |

P4

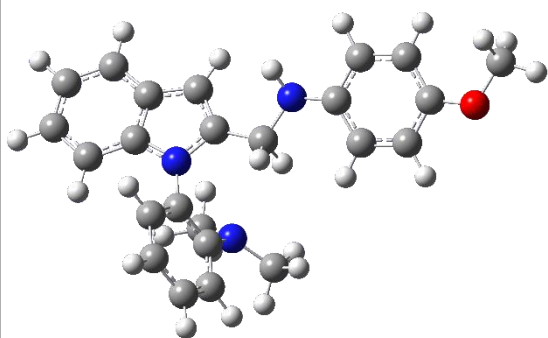

-1169.009597

|   |         |         |         |
|---|---------|---------|---------|
| C | -3.1297 | -4.3048 | 2.7522  |
| C | -4.0446 | -3.7631 | 1.8555  |
| C | -3.681  | -2.7154 | 1.0049  |
| C | -2.3624 | -2.2252 | 1.0715  |
| C | -1.4366 | -2.7495 | 1.9769  |
| C | -1.8252 | -3.807  | 2.8226  |
| N | -1.7402 | -1.1716 | 0.4024  |
| C | -0.2316 | -2.0238 | 1.8145  |
| C | -0.417  | -1.0838 | 0.8178  |
| C | 0.5608  | -0.12   | 0.2134  |
| N | 1.9539  | -0.5219 | 0.4066  |
| C | 2.9927  | 0.1956  | -0.1875 |
| C | 2.8405  | 1.4509  | -0.7812 |
| C | 4.2961  | -0.3086 | -0.0705 |
| C | 3.9432  | 2.1441  | -1.2974 |
| C | 5.4049  | 0.3867  | -0.5726 |
| C | 5.2307  | 1.6189  | -1.1944 |
| O | 6.2168  | 2.4009  | -1.7282 |
| C | 7.5555  | 1.9593  | -1.5409 |
| C | -2.369  | -0.3513 | -0.573  |
| C | -2.8107 | -0.9867 | -1.7474 |
| C | -2.4748 | 1.0496  | -0.3938 |
| C | -3.3371 | -0.2299 | -2.7881 |
| C | -2.9971 | 1.7774  | -1.4782 |
| C | -3.4224 | 1.1513  | -2.6567 |
| N | -2.1359 | 1.682   | 0.8107  |
| C | -2.8845 | 1.218   | 1.9873  |
| C | -1.8035 | 3.103   | 0.8111  |
| H | -3.4315 | -5.1157 | 3.4102  |
| H | -5.0596 | -4.152  | 1.8209  |
| H | -4.4108 | -2.2836 | 0.3263  |
| H | -1.1187 | -4.2281 | 3.5325  |
| H | 0.6913  | -2.1797 | 2.3595  |
| H | 0.3666  | -0.0392 | -0.8631 |
| H | 0.4127  | 0.8619  | 0.6743  |
| H | 2.0807  | -1.5248 | 0.3089  |
| H | 1.8639  | 1.9169  | -0.8677 |
| H | 4.4622  | -1.2579 | 0.4339  |
| H | 3.7932  | 3.1098  | -1.7733 |
| H | 6.3841  | -0.063  | -0.4517 |
| H | 8.2193  | 2.7053  | -1.9887 |
| H | 7.7328  | 1.0072  | -2.0518 |
| H | 7.8035  | 1.8897  | -0.4764 |
| H | -2.7081 | -2.0628 | -1.8715 |

|                                                                                    |   |         |         |         |
|------------------------------------------------------------------------------------|---|---------|---------|---------|
|                                                                                    | H | -3.6657 | -0.7131 | -3.7044 |
|                                                                                    | H | -3.1204 | 2.8549  | -1.4149 |
|                                                                                    | H | -3.8307 | 1.7499  | -3.4672 |
|                                                                                    | H | -3.769  | 0.6257  | 1.7245  |
|                                                                                    | H | -3.242  | 2.0646  | 2.5852  |
|                                                                                    | H | -2.2334 | 0.6189  | 2.6311  |
|                                                                                    | H | -1.097  | 3.3458  | 0.0098  |
|                                                                                    | H | -1.3159 | 3.3692  | 1.7558  |
|                                                                                    | H | -2.6996 | 3.7248  | 0.7088  |
| P5                                                                                 | C | -3.2068 | 4.7169  | -2.0255 |
| 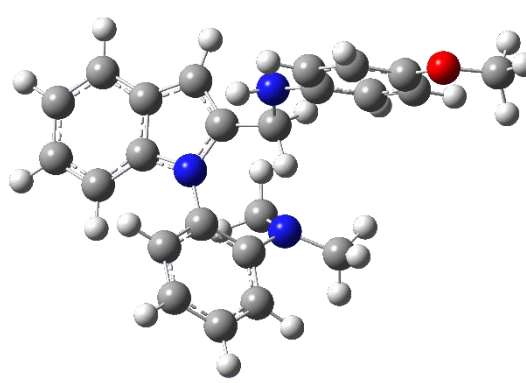 | C | -4.074  | 3.9779  | -1.2288 |
|                                                                                    | C | -3.6541 | 2.7906  | -0.6228 |
|                                                                                    | C | -2.3268 | 2.3634  | -0.8279 |
|                                                                                    | C | -1.452  | 3.0845  | -1.6429 |
|                                                                                    | C | -1.8962 | 4.2801  | -2.242  |
|                                                                                    | N | -1.6486 | 1.2258  | -0.3817 |
|                                                                                    | C | -0.2269 | 2.3781  | -1.6694 |
|                                                                                    | C | -0.3527 | 1.25    | -0.8783 |
|                                                                                    | C | 0.7036  | 0.2423  | -0.5423 |
|                                                                                    | N | 1.8701  | 0.8799  | 0.0724  |
|                                                                                    | C | 2.9123  | 0.0739  | 0.5435  |
|                                                                                    | C | 3.7357  | 0.5667  | 1.5635  |
|                                                                                    | C | 3.274   | -1.1412 | -0.0473 |
|                                                                                    | C | 4.8376  | -0.1623 | 2.0231  |
|                                                                                    | C | 4.3828  | -1.8729 | 0.4045  |
|                                                                                    | C | 5.1683  | -1.3867 | 1.4463  |
|                                                                                    | O | 6.2715  | -1.9942 | 1.9776  |
|                                                                                    | C | 6.7061  | -3.1938 | 1.3504  |
|                                                                                    | C | -2.2023 | 0.2589  | 0.5024  |
|                                                                                    | C | -2.6289 | 0.7378  | 1.7574  |
|                                                                                    | C | -2.2566 | -1.1174 | 0.1695  |
|                                                                                    | C | -3.0928 | -0.1468 | 2.7228  |
|                                                                                    | C | -2.7195 | -1.9771 | 1.1856  |
|                                                                                    | C | -3.1319 | -1.5047 | 2.4388  |
|                                                                                    | N | -1.8992 | -1.6149 | -1.0942 |
|                                                                                    | C | -1.6013 | -3.0372 | -1.2467 |
|                                                                                    | C | -2.5872 | -1.0046 | -2.24   |
|                                                                                    | H | -3.5501 | 5.6376  | -2.4904 |
|                                                                                    | H | -5.0942 | 4.3231  | -1.0782 |
|                                                                                    | H | -4.3472 | 2.212   | -0.0192 |
|                                                                                    | H | -1.2268 | 4.8578  | -2.873  |
|                                                                                    | H | 0.6768  | 2.6696  | -2.1905 |
|                                                                                    | H | 0.9939  | -0.2488 | -1.4791 |
|                                                                                    | H | 0.3372  | -0.5284 | 0.1396  |
| -1169.009918                                                                       |   |         |         |         |



|    |   |         |         |         |
|----|---|---------|---------|---------|
|    | H | 1.5764  | 1.5564  | 0.7722  |
|    | H | 3.524   | 1.5309  | 2.0185  |
|    | H | 2.7091  | -1.5417 | -0.8835 |
|    | H | 5.4485  | 0.2384  | 2.8277  |
|    | H | 4.6056  | -2.8117 | -0.0905 |
|    | H | 6.9652  | -3.0201 | 0.3006  |
|    | H | 5.9544  | -3.984  | 1.4471  |
|    | H | 7.6112  | -3.531  | 1.8647  |
|    | H | -2.5596 | 1.796   | 2.0026  |
|    | H | -3.4057 | 0.2199  | 3.6966  |
|    | H | -2.7988 | -3.0471 | 1.016   |
|    | H | -3.4876 | -2.2063 | 3.1893  |
|    | H | -2.5153 | -3.6412 | -1.2198 |
|    | H | -0.9096 | -3.3862 | -0.4721 |
|    | H | -1.111  | -3.2147 | -2.2106 |
|    | H | -1.8854 | -0.3848 | -2.8065 |
|    | H | -3.4508 | -0.396  | -1.9492 |
|    | H | -2.9645 | -1.7726 | -2.9256 |
| P6 | C | -0.8222 | -5.0227 | -0.0828 |
|    | C | -2.0615 | -4.5168 | 0.2957  |
|    | C | -2.377  | -3.1701 | 0.0971  |
|    | C | -1.4088 | -2.3376 | -0.4964 |
|    | C | -0.1567 | -2.8268 | -0.8708 |
|    | C | 0.1369  | -4.1895 | -0.6675 |
|    | N | -1.426  | -0.9705 | -0.7744 |
|    | C | 0.5726  | -1.74   | -1.4111 |
|    | C | -0.2195 | -0.6072 | -1.3561 |
|    | C | 0.0794  | 0.7697  | -1.8585 |
|    | N | 0.5545  | 1.7046  | -0.8482 |
|    | C | 1.8305  | 1.6098  | -0.2916 |
|    | C | 2.085   | 2.312   | 0.8935  |
|    | C | 2.9159  | 0.9794  | -0.904  |
|    | C | 3.3444  | 2.2967  | 1.4985  |
|    | C | 4.1832  | 0.9532  | -0.3003 |
|    | C | 4.397   | 1.5983  | 0.9151  |
|    | O | 5.5717  | 1.642   | 1.6119  |
|    | C | 6.6208  | 0.805   | 1.1438  |
|    | C | -2.5634 | -0.1393 | -0.6004 |
|    | C | -3.6481 | -0.4253 | -1.457  |
|    | C | -2.5907 | 0.9405  | 0.3181  |
|    | C | -4.7774 | 0.3816  | -1.4517 |
|    | C | -3.7521 | 1.7422  | 0.2645  |
|    | C | -4.8248 | 1.4716  | -0.5969 |
|    | N | -1.5602 | 1.2243  | 1.2415  |

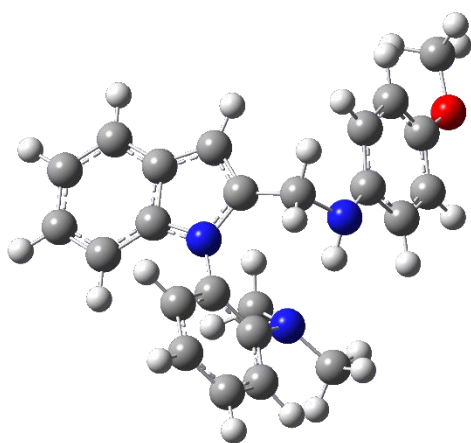

-1169.007495

|                                                                                     |   |         |         |         |
|-------------------------------------------------------------------------------------|---|---------|---------|---------|
|                                                                                     | C | -1.6495 | 2.4542  | 2.0379  |
|                                                                                     | C | -1.0575 | 0.0691  | 2.0085  |
|                                                                                     | H | -0.5931 | -6.0725 | 0.0818  |
|                                                                                     | H | -2.7934 | -5.1746 | 0.7586  |
|                                                                                     | H | -3.3404 | -2.779  | 0.4117  |
|                                                                                     | H | 1.1045  | -4.5909 | -0.9549 |
|                                                                                     | H | 1.5775  | -1.782  | -1.8101 |
|                                                                                     | H | -0.8287 | 1.1965  | -2.3024 |
|                                                                                     | H | 0.7832  | 0.717   | -2.6983 |
|                                                                                     | H | -0.1535 | 1.779   | -0.1072 |
|                                                                                     | H | 1.29    | 2.8839  | 1.362   |
|                                                                                     | H | 2.8034  | 0.4846  | -1.8626 |
|                                                                                     | H | 3.5002  | 2.8355  | 2.4289  |
|                                                                                     | H | 4.9794  | 0.4282  | -0.8162 |
|                                                                                     | H | 6.3086  | -0.2443 | 1.1117  |
|                                                                                     | H | 7.4509  | 0.8831  | 1.8524  |
|                                                                                     | H | 6.9832  | 1.1404  | 0.1668  |
|                                                                                     | H | -3.5979 | -1.2585 | -2.1561 |
|                                                                                     | H | -5.6065 | 0.1715  | -2.1214 |
|                                                                                     | H | -3.8725 | 2.6011  | 0.9183  |
|                                                                                     | H | -5.6983 | 2.1189  | -0.588  |
|                                                                                     | H | -1.7634 | 3.3351  | 1.3969  |
|                                                                                     | H | -2.4741 | 2.4046  | 2.7579  |
|                                                                                     | H | -0.7258 | 2.6066  | 2.6071  |
|                                                                                     | H | -0.2187 | -0.4062 | 1.4947  |
|                                                                                     | H | -1.8441 | -0.6676 | 2.2066  |
|                                                                                     | H | -0.6671 | 0.3818  | 2.9845  |
| P7                                                                                  | C | -0.5004 | -0.5136 | -5.1091 |
| 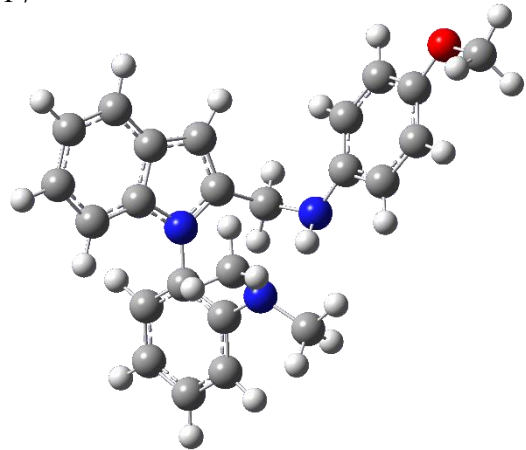 | C | -1.7974 | -0.1891 | -4.7233 |
|                                                                                     | C | -2.2185 | -0.3653 | -3.4025 |
|                                                                                     | C | -1.2949 | -0.8776 | -2.4724 |
|                                                                                     | C | 0.0108  | -1.2064 | -2.842  |
|                                                                                     | C | 0.4107  | -1.026  | -4.1802 |
|                                                                                     | N | -1.4035 | -1.0897 | -1.1002 |
|                                                                                     | C | 0.6703  | -1.6775 | -1.6799 |
|                                                                                     | C | -0.2153 | -1.6164 | -0.6203 |
|                                                                                     | C | -0.017  | -2.034  | 0.8012  |
|                                                                                     | N | 0.5091  | -0.9809 | 1.6591  |
|                                                                                     | C | 1.8572  | -0.6193 | 1.6232  |
|                                                                                     | C | 2.8894  | -1.4728 | 1.2262  |
|                                                                                     | C | 2.2248  | 0.6217  | 2.161   |
|                                                                                     | C | 4.228   | -1.0634 | 1.2754  |
|                                                                                     | C | 3.5622  | 1.0355  | 2.2214  |
|                                                                                     | C | 4.5719  | 0.1953  | 1.7639  |
| -1169.007308                                                                        |   |         |         |         |

|  |   |         |         |         |
|--|---|---------|---------|---------|
|  | O | 5.9105  | 0.4716  | 1.7536  |
|  | C | 6.3015  | 1.754   | 2.2265  |
|  | C | -2.583  | -0.8676 | -0.3469 |
|  | C | -3.631  | -1.7817 | -0.5675 |
|  | C | -2.6646 | 0.1595  | 0.6261  |
|  | C | -4.7851 | -1.7114 | 0.2019  |
|  | C | -3.8508 | 0.1831  | 1.3861  |
|  | C | -4.8927 | -0.7322 | 1.1807  |
|  | N | -1.6497 | 1.1226  | 0.8202  |
|  | C | -1.3182 | 1.8886  | -0.3954 |
|  | C | -1.6852 | 1.9386  | 2.0369  |
|  | H | -0.1884 | -0.363  | -6.1395 |
|  | H | -2.4914 | 0.2163  | -5.4558 |
|  | H | -3.2255 | -0.0894 | -3.1035 |
|  | H | 1.4235  | -1.2714 | -4.4871 |
|  | H | 1.6939  | -2.0245 | -1.6207 |
|  | H | 0.6036  | -2.9366 | 0.844   |
|  | H | -0.973  | -2.3581 | 1.2299  |
|  | H | -0.0988 | -0.1593 | 1.574   |
|  | H | 2.6848  | -2.4741 | 0.8639  |
|  | H | 1.4566  | 1.2878  | 2.5444  |
|  | H | 5.0074  | -1.741  | 0.9363  |
|  | H | 3.7726  | 2.0135  | 2.6386  |
|  | H | 6.0567  | 1.8728  | 3.2871  |
|  | H | 5.8541  | 2.5524  | 1.625   |
|  | H | 7.3882  | 1.8309  | 2.1245  |
|  | H | -3.533  | -2.5702 | -1.3112 |
|  | H | -5.5902 | -2.425  | 0.0497  |
|  | H | -4.011  | 0.9381  | 2.1503  |
|  | H | -5.7909 | -0.67   | 1.7902  |
|  | H | -1.0229 | 2.9152  | -0.1477 |
|  | H | -0.464  | 1.4415  | -0.9102 |
|  | H | -2.1679 | 1.9651  | -1.0846 |
|  | H | -1.7779 | 1.3139  | 2.9319  |
|  | H | -2.5004 | 2.6702  | 2.0082  |
|  | H | -0.7452 | 2.4929  | 2.1384  |
|  | C | -3.6363 | -3.3257 | -3.5057 |
|  | C | -4.442  | -2.7026 | -2.5584 |
|  | C | -3.8931 | -1.8382 | -1.6071 |
|  | C | -2.5025 | -1.6173 | -1.6261 |
|  | C | -1.6817 | -2.2274 | -2.5781 |
|  | C | -2.257  | -3.0972 | -3.5251 |
|  | N | -1.6961 | -0.7824 | -0.8526 |
|  | C | -0.3588 | -1.7844 | -2.3375 |

P8

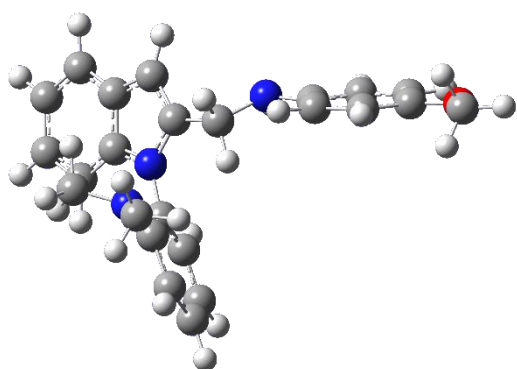

-1169.009919

|   |         |         |         |
|---|---------|---------|---------|
| C | -0.3772 | -0.9152 | -1.2627 |
| C | 0.7815  | -0.2458 | -0.5891 |
| N | 1.7411  | -1.2235 | -0.0727 |
| C | 2.7746  | -0.7886 | 0.764   |
| C | 3.3222  | 0.4975  | 0.7119  |
| C | 3.3984  | -1.722  | 1.6013  |
| C | 4.4122  | 0.8624  | 1.5173  |
| C | 4.4831  | -1.363  | 2.4089  |
| C | 4.9959  | -0.068  | 2.3732  |
| O | 6.0591  | 0.1534  | 3.2034  |
| C | 6.6698  | 1.4355  | 3.1346  |
| C | -2.1684 | 0.035   | 0.2081  |
| C | -2.7297 | -0.6235 | 1.3161  |
| C | -2.0001 | 1.441   | 0.1752  |
| C | -3.1049 | 0.1083  | 2.4367  |
| C | -2.381  | 2.14    | 1.3338  |
| C | -2.924  | 1.487   | 2.4481  |
| N | -1.5159 | 2.1085  | -0.9607 |
| C | -2.3482 | 1.951   | -2.162  |
| C | -0.8965 | 3.4207  | -0.8072 |
| H | -4.081  | -3.9909 | -4.2415 |
| H | -5.5144 | -2.8828 | -2.5613 |
| H | -4.5344 | -1.3399 | -0.886  |
| H | -1.6348 | -3.5817 | -4.2724 |
| H | 0.5316  | -2.0821 | -2.8781 |
| H | 0.4575  | 0.3922  | 0.2368  |
| H | 1.2729  | 0.3958  | -1.331  |
| H | 1.2622  | -2.0324 | 0.314   |
| H | 2.9167  | 1.246   | 0.0379  |
| H | 3.0416  | -2.7482 | 1.6359  |
| H | 4.7814  | 1.8789  | 1.4396  |
| H | 4.9369  | -2.1058 | 3.0598  |
| H | 7.0585  | 1.6356  | 2.1305  |
| H | 5.9762  | 2.2201  | 3.4542  |
| H | 7.5181  | 1.4393  | 3.8258  |
| H | -2.8335 | -1.7065 | 1.3275  |
| H | -3.5204 | -0.3958 | 3.3051  |
| H | -2.2901 | 3.2211  | 1.3851  |
| H | -3.2104 | 2.0643  | 3.3237  |
| H | -3.3123 | 1.4698  | -1.9589 |
| H | -1.8097 | 1.3596  | -2.9091 |
| H | -2.5742 | 2.924   | -2.6138 |
| H | -1.6438 | 4.1998  | -0.6208 |
| H | -0.3582 | 3.6849  | -1.7245 |

|                                                                                   |   |         |         |         |
|-----------------------------------------------------------------------------------|---|---------|---------|---------|
|                                                                                   | H | -0.1605 | 3.4192  | 0.0043  |
| P9                                                                                | C | -1.3565 | 4.6184  | 0.5765  |
| 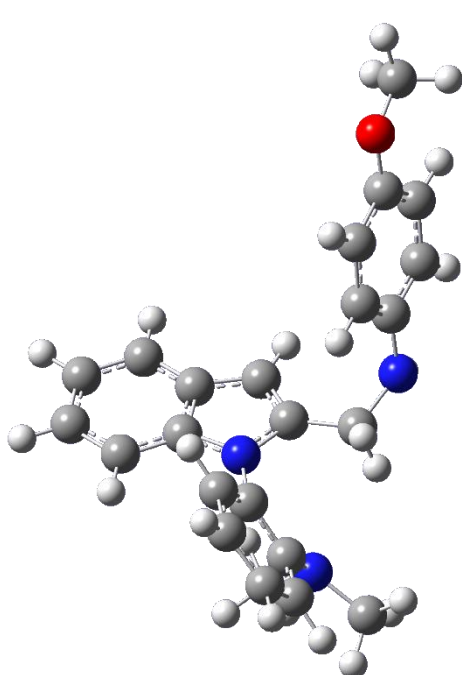 | C | -2.23   | 3.9507  | 1.4274  |
|                                                                                   | C | -2.3071 | 2.555   | 1.4244  |
|                                                                                   | C | -1.4696 | 1.8365  | 0.5476  |
|                                                                                   | C | -0.6083 | 2.496   | -0.3311 |
|                                                                                   | C | -0.5443 | 3.9033  | -0.3083 |
|                                                                                   | N | -1.3435 | 0.465   | 0.3108  |
|                                                                                   | C | 0.0513  | 1.505   | -1.0951 |
|                                                                                   | C | -0.3823 | 0.2607  | -0.6734 |
|                                                                                   | C | 0.0882  | -1.1028 | -1.0847 |
|                                                                                   | N | 1.3919  | -1.1447 | -1.7543 |
|                                                                                   | C | 2.5686  | -0.807  | -1.0848 |
|                                                                                   | C | 2.7106  | -0.8241 | 0.3046  |
|                                                                                   | C | 3.7181  | -0.5528 | -1.8467 |
|                                                                                   | C | 3.9352  | -0.5125 | 0.9093  |
|                                                                                   | C | 4.9464  | -0.242  | -1.248  |
|                                                                                   | C | 5.0556  | -0.206  | 0.1384  |
|                                                                                   | O | 6.1839  | 0.092   | 0.8505  |
|                                                                                   | C | 7.3097  | 0.5379  | 0.1049  |
| -1169.010165                                                                      | C | -2.0448 | -0.5434 | 1.0309  |
|                                                                                   | C | -1.8693 | -0.5532 | 2.4288  |
|                                                                                   | C | -2.8233 | -1.5275 | 0.3745  |
|                                                                                   | C | -2.4424 | -1.5578 | 3.2002  |
|                                                                                   | C | -3.3723 | -2.5348 | 1.1935  |
|                                                                                   | C | -3.1873 | -2.5524 | 2.5815  |
|                                                                                   | N | -3.0981 | -1.4828 | -1.0083 |
|                                                                                   | C | -3.4983 | -2.724  | -1.6721 |
|                                                                                   | C | -3.8875 | -0.3064 | -1.4043 |
|                                                                                   | H | -1.3075 | 5.7041  | 0.5928  |
|                                                                                   | H | -2.8651 | 4.5199  | 2.1022  |
|                                                                                   | H | -3.0072 | 2.0472  | 2.0812  |
|                                                                                   | H | 0.1306  | 4.4308  | -0.9763 |
|                                                                                   | H | 0.8075  | 1.6801  | -1.8492 |
|                                                                                   | H | 0.0959  | -1.7979 | -0.2376 |
|                                                                                   | H | -0.6287 | -1.5078 | -1.8062 |
|                                                                                   | H | 1.3431  | -0.7286 | -2.6784 |
|                                                                                   | H | 1.8722  | -1.0637 | 0.9509  |
|                                                                                   | H | 3.6652  | -0.5903 | -2.9321 |
|                                                                                   | H | 4.0101  | -0.5094 | 1.9936  |
|                                                                                   | H | 5.7923  | -0.0432 | -1.8963 |
|                                                                                   | H | 7.0718  | 1.4352  | -0.4764 |
|                                                                                   | H | 7.6953  | -0.2595 | -0.5387 |
|                                                                                   | H | 8.0984  | 0.8025  | 0.8158  |

|  |   |         |         |         |
|--|---|---------|---------|---------|
|  | H | -1.2505 | 0.1969  | 2.918   |
|  | H | -2.2955 | -1.5724 | 4.2768  |
|  | H | -3.9919 | -3.3206 | 0.7711  |
|  | H | -3.6365 | -3.3443 | 3.1756  |
|  | H | -2.8335 | -3.5526 | -1.4034 |
|  | H | -4.5342 | -2.9926 | -1.4366 |
|  | H | -3.4237 | -2.6018 | -2.7586 |
|  | H | -4.3605 | -0.4658 | -2.3805 |
|  | H | -3.2563 | 0.5786  | -1.5154 |
|  | H | -4.6863 | -0.0914 | -0.685  |

### Investigation on the Enantiomerization Barrier

The reaction was conducted at 1 mg/mL concentration in a sealed tube and heated at the specified temperature. The change in ee over time was determined by HPLC. The barrier to rotation for **4aa** was obtained by kinetic of racemization of an enantiomer.

This data was plotted as  $(\ln[ee_0/ee_t])$  versus time (seconds). The gradient of this graph gives the racemization constant ( $k_{\text{racemization}} = 2 \times k_{\text{enantiomerization}}$ ) at the specified temperature. The barrier to rotation,  $\Delta G^\ddagger_{\text{enantiomerization}}$ , was calculated using the following Eyring equation,  $R =$  Gas constant =  $8.3145 \text{ J}\cdot\text{K}^{-1}\cdot\text{mol}^{-1}$ ,  $h =$  Planck constant =  $6.62608 \times 10^{-34} \text{ J}\cdot\text{s}$ ,  $k_B =$  Boltzmann constant =  $1.38066 \times 10^{-23} \text{ J}\cdot\text{K}^{-1}$ , and  $T_1 =$  temperature racemization study was conducted at, in Kelvin.

$$\Delta G^\ddagger_{\text{enantiomerization}} = RT_1 \ln \frac{k_B T_1}{h k_{\text{enantiomerization}}}$$

Racemization of **4aa** in *i*-PrOH at 80 °C

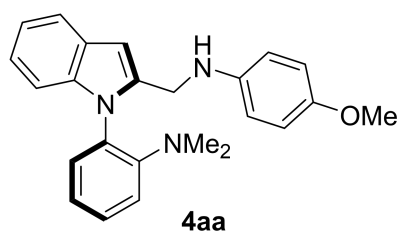

**Table S4. Investigation on the enantiomerization barrier of 4aa**

| Time (seconds) | Enantiomeric Excess (ee) | First Order Racemization ( $\ln[ee_0/ee_t]$ ) |
|----------------|--------------------------|-----------------------------------------------|
| 0              | 91.50                    | 0.00000                                       |
| 1800           | 91.40                    | 0.00109                                       |
| 3600           | 88.48                    | 0.03356                                       |

|       |       |         |
|-------|-------|---------|
| 7200  | 86.02 | 0.06176 |
| 14400 | 81.72 | 0.11304 |
| 21600 | 76.13 | 0.18390 |
| 28800 | 72.36 | 0.23469 |
| 36000 | 68.60 | 0.28805 |
| 43200 | 63.62 | 0.36341 |

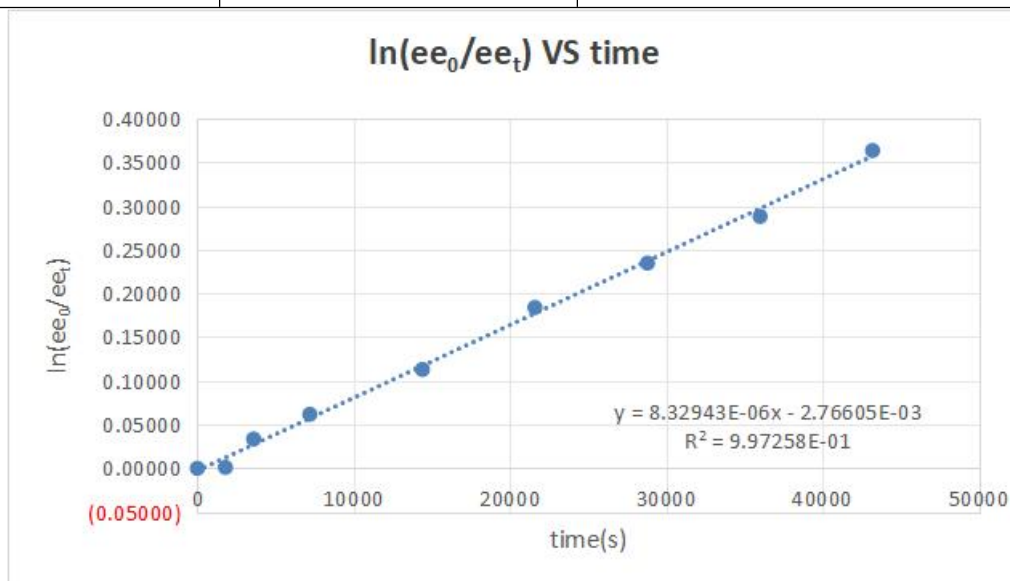

$$k_{\text{racemization}} (80\text{ }^\circ\text{C}) = 8.32943 \times 10^{-6} \text{ s}^{-1}$$

$$k_{\text{enantiomerization}} (80\text{ }^\circ\text{C}) = 4.16472 \times 10^{-6} \text{ s}^{-1}$$

$$\Delta G^\ddagger_{\text{enantiomerization}} = 123.369 \text{ kJ/mol} = 29.486 \text{ kcal/mol}$$

$$k_{\text{racemization}} (25\text{ }^\circ\text{C}) = 3.02746 \times 10^{-9} \text{ s}^{-1}$$

$$t_{1/2} (25\text{ }^\circ\text{C}) = 7.26 \text{ years}$$

# NMR Spectra of 1

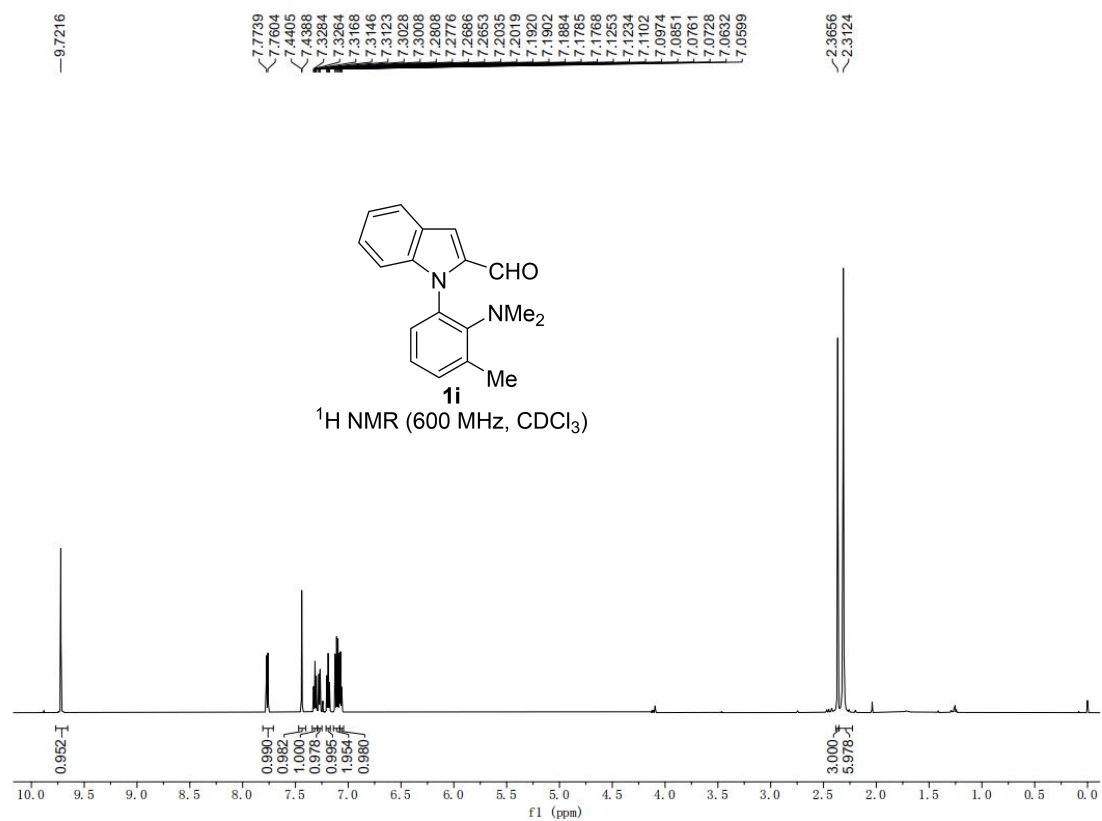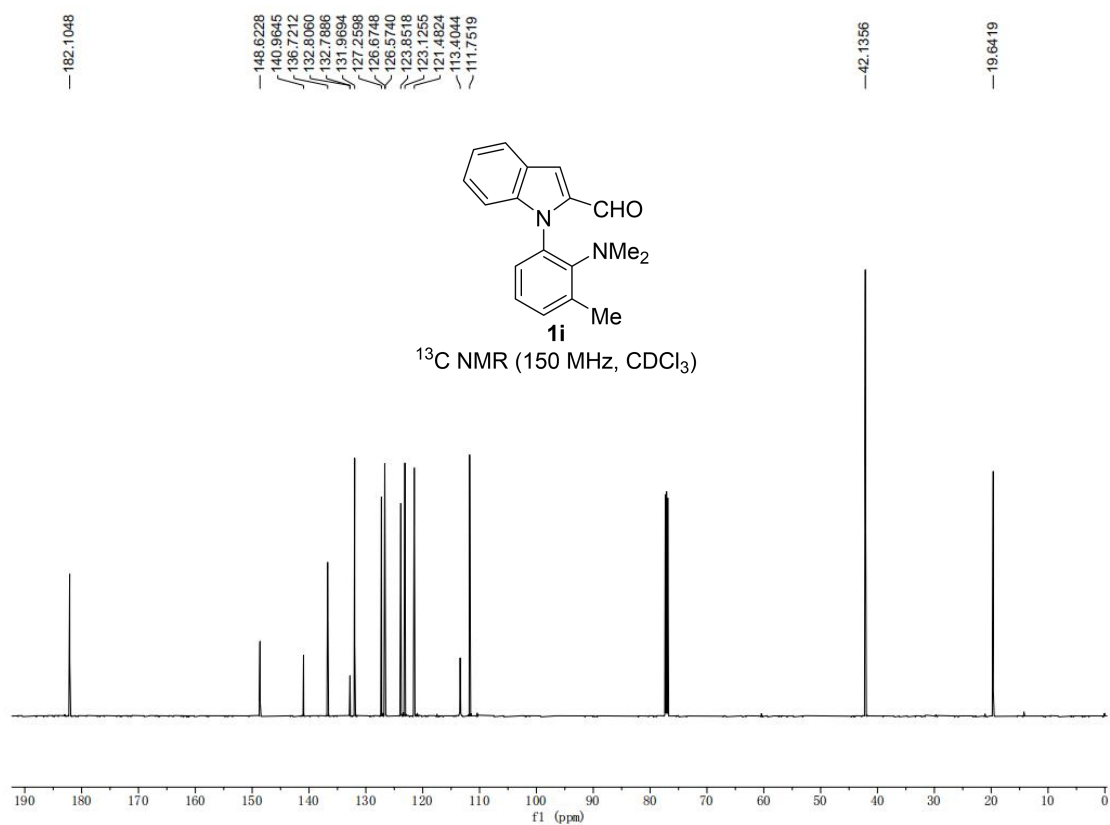



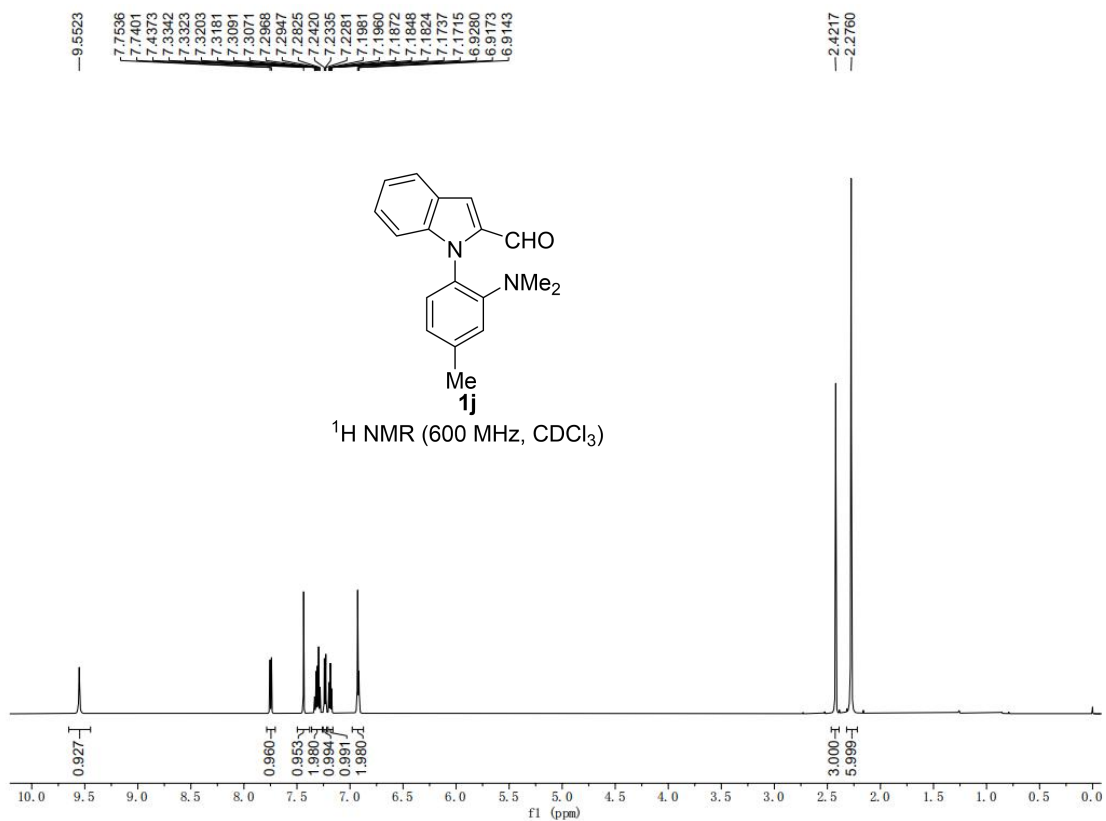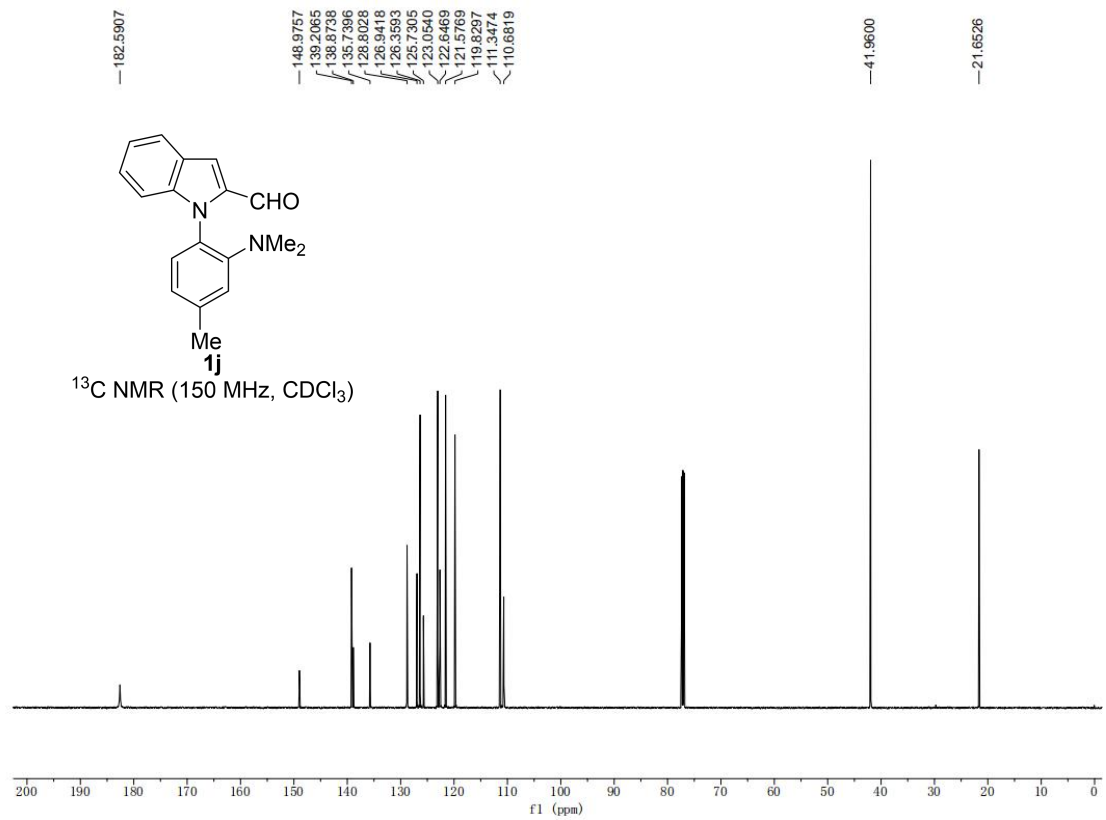

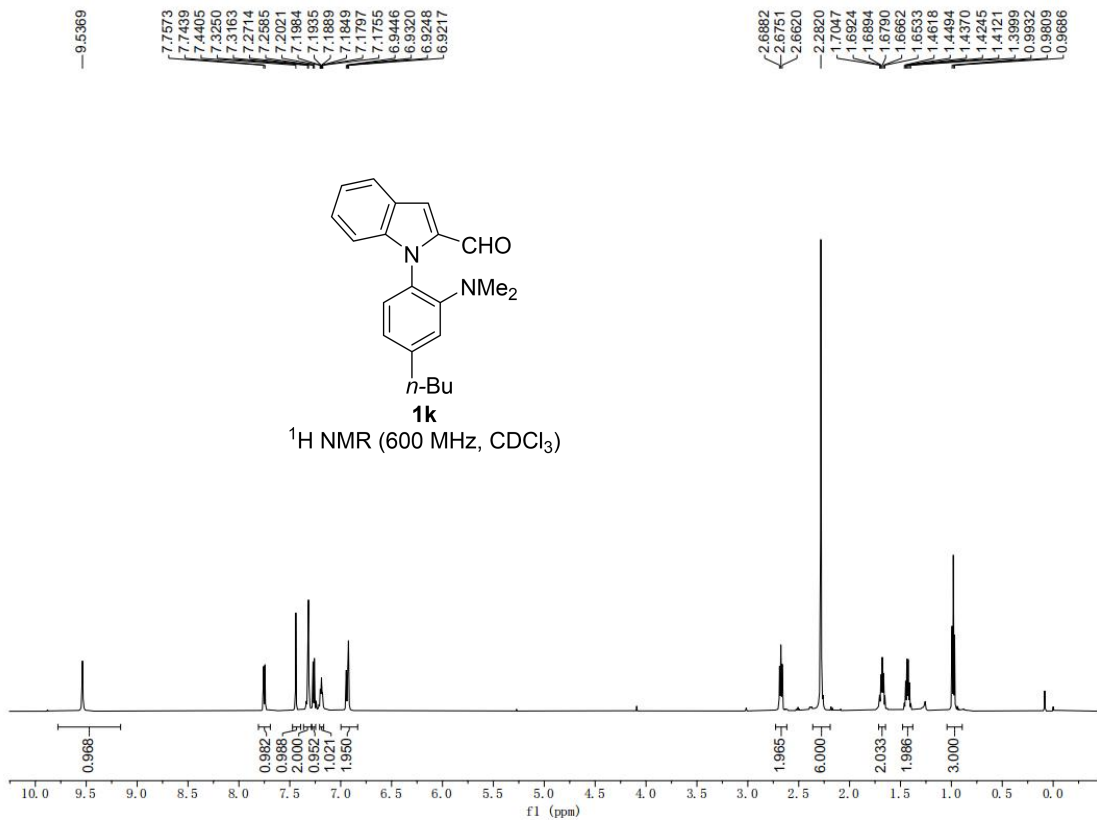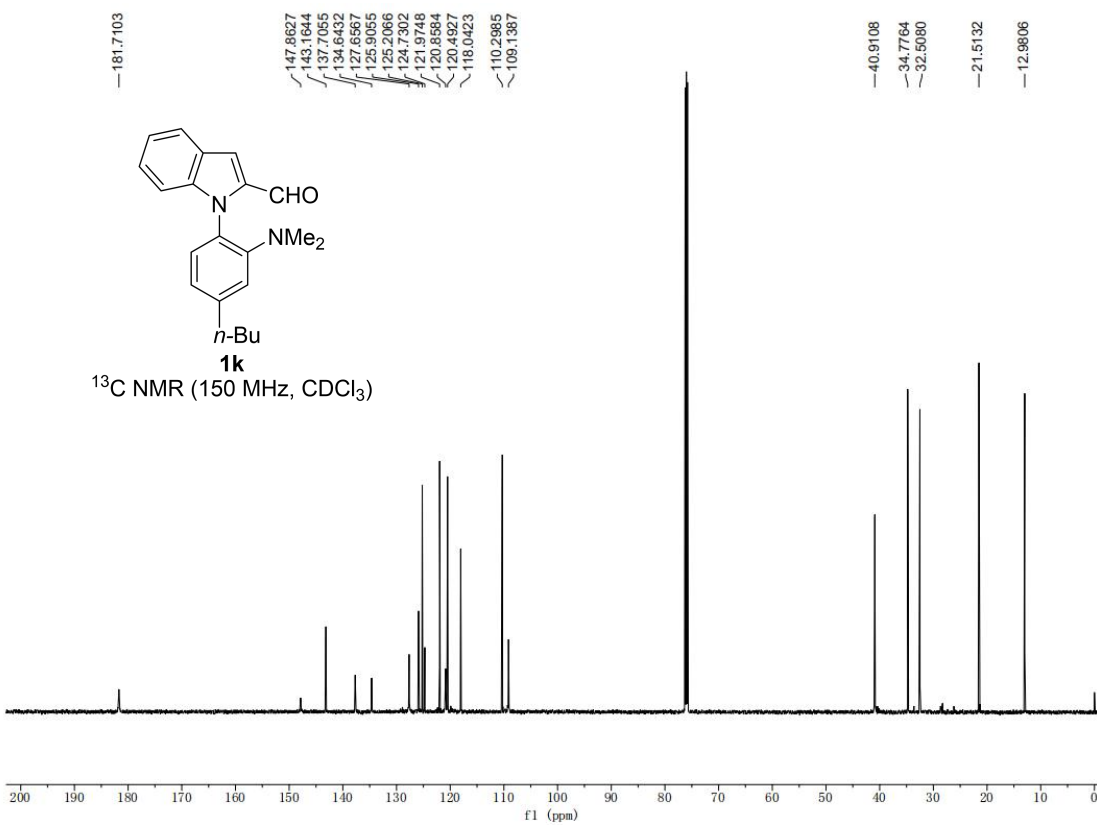

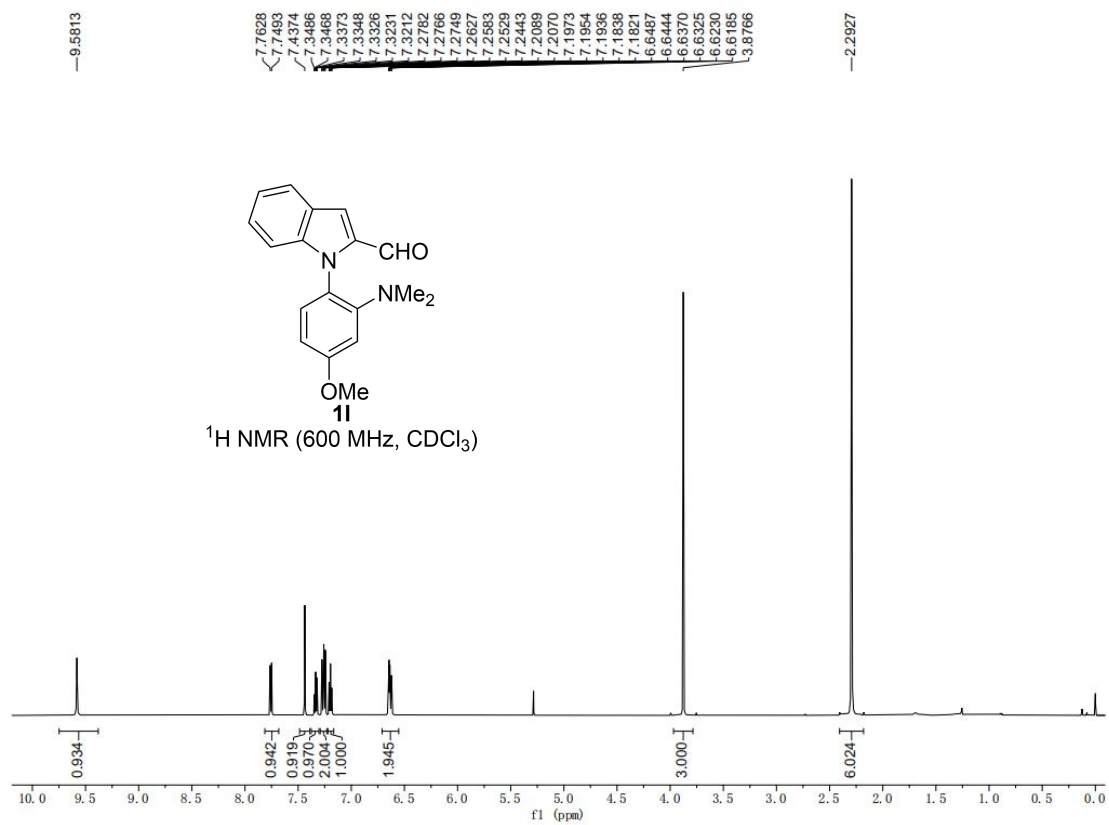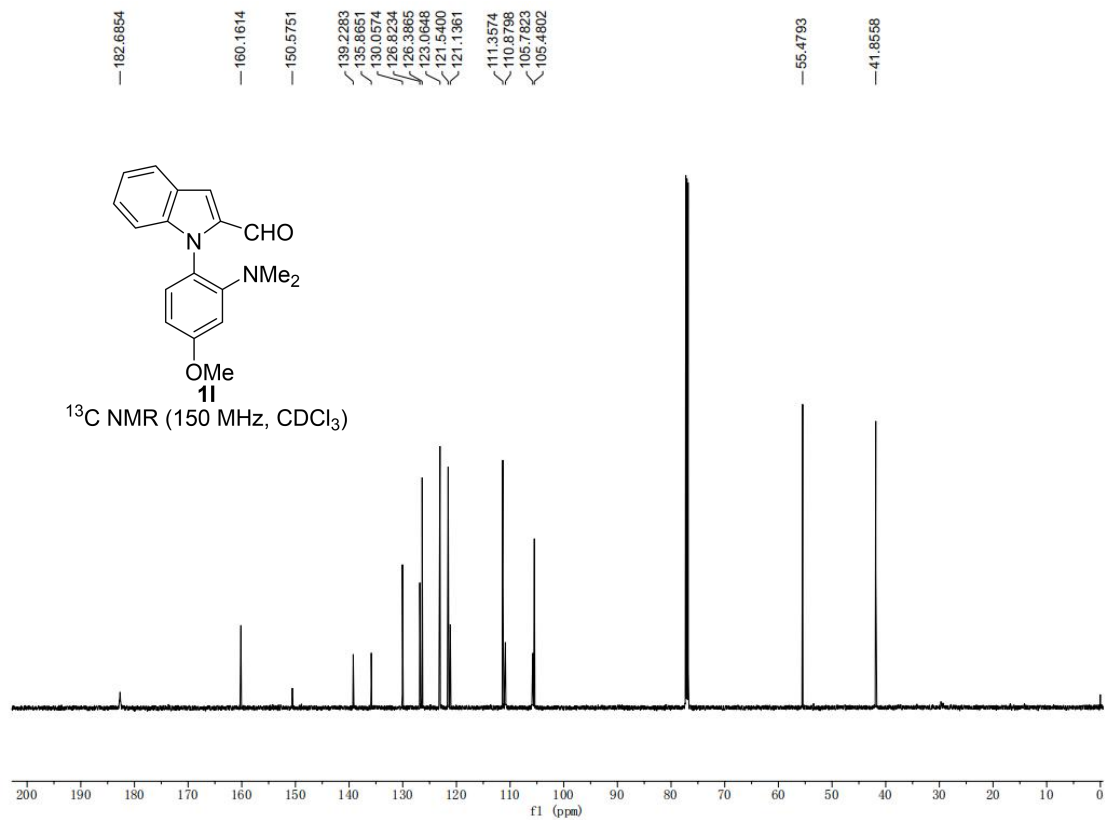

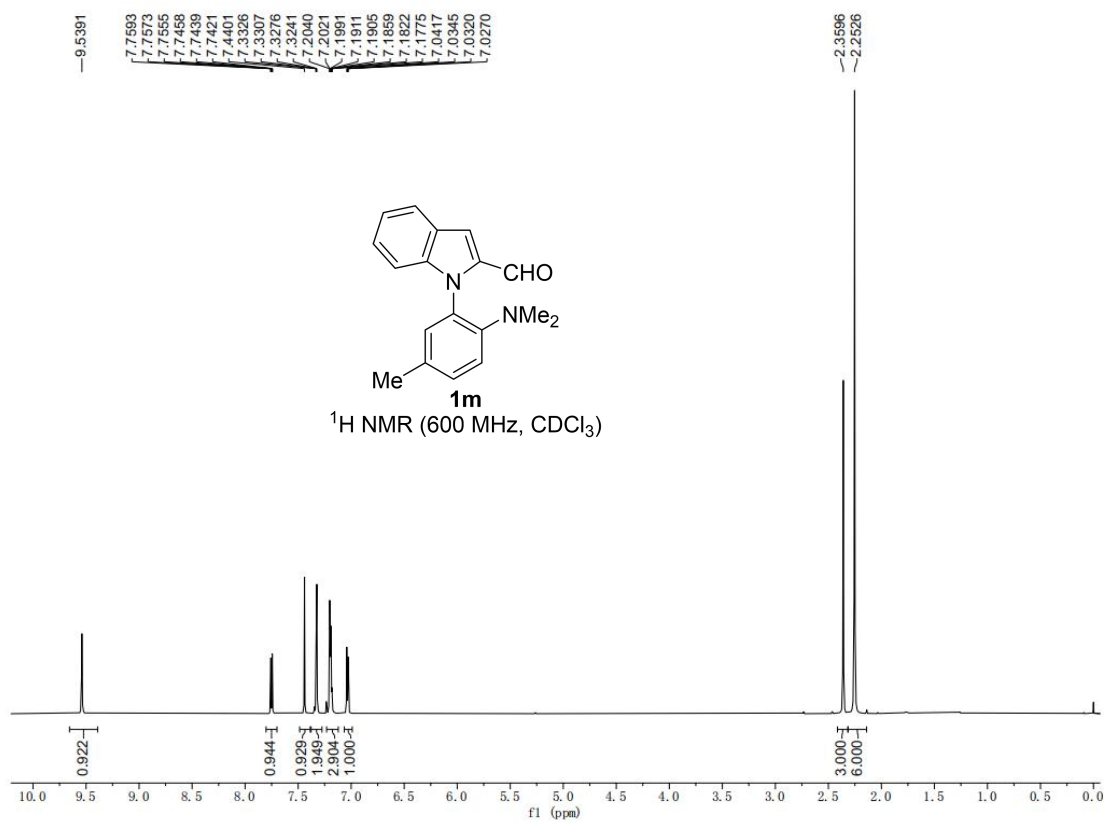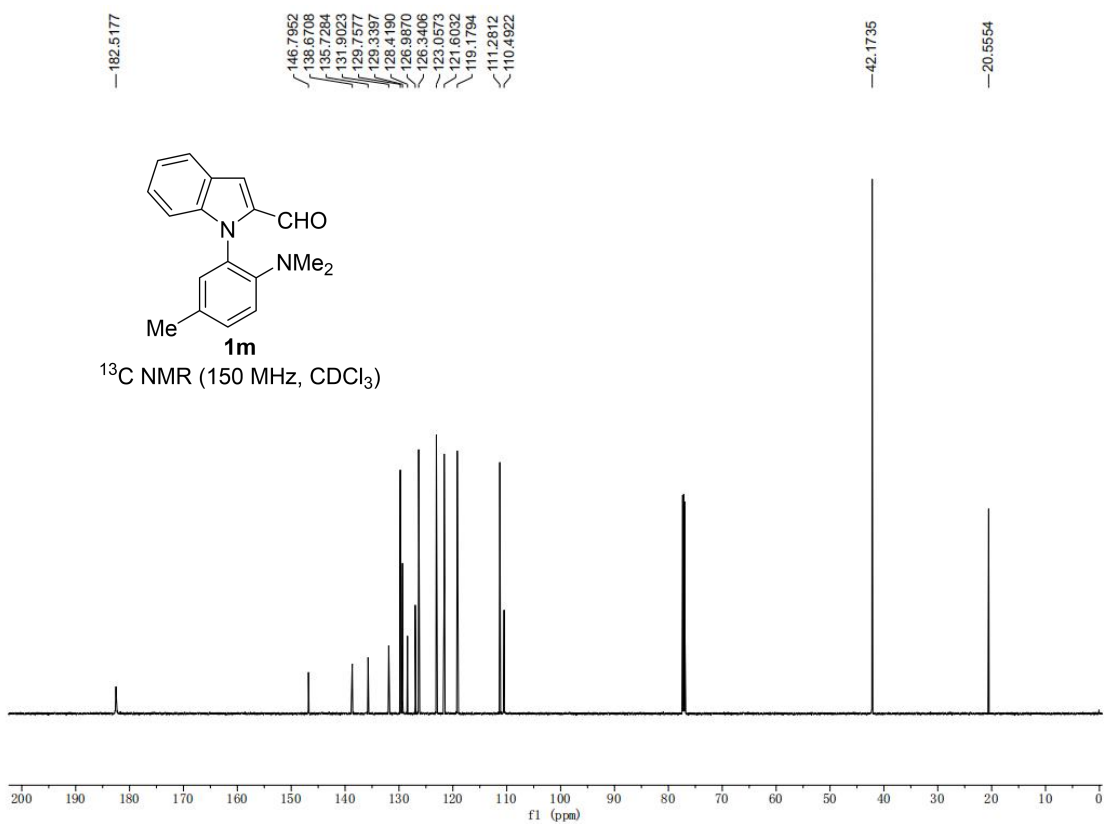

## NMR Spectra of Products

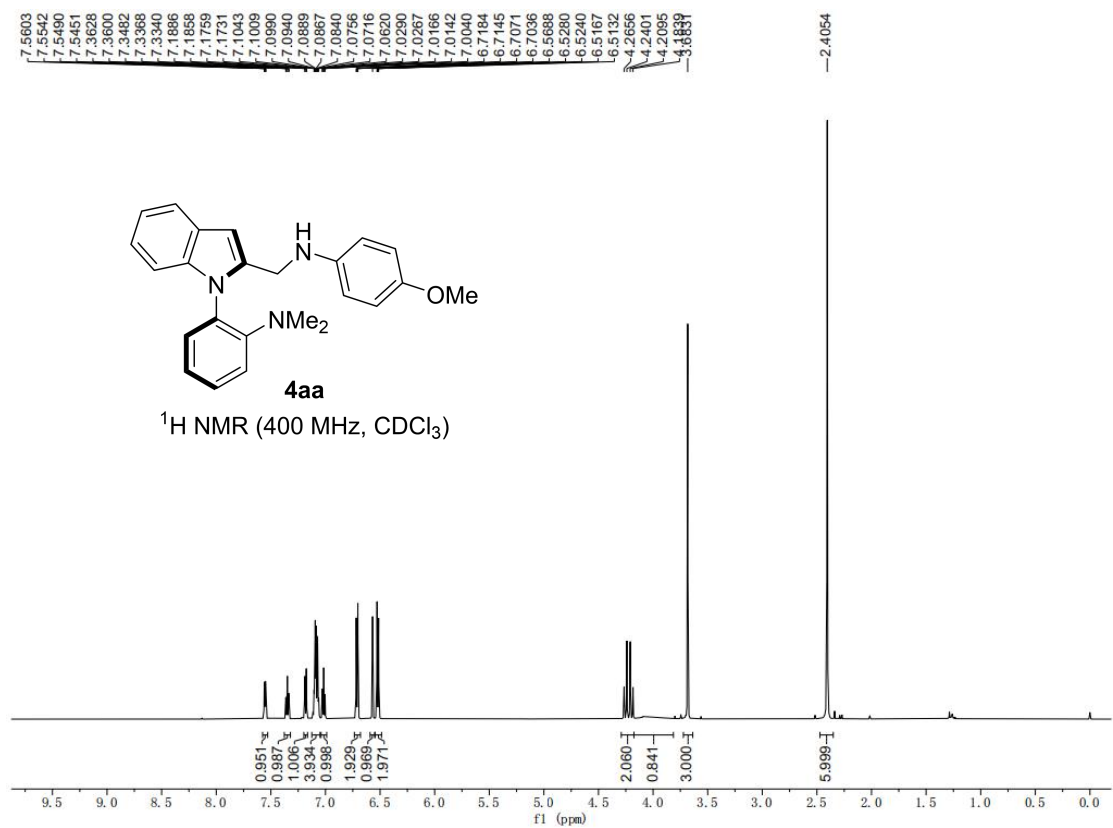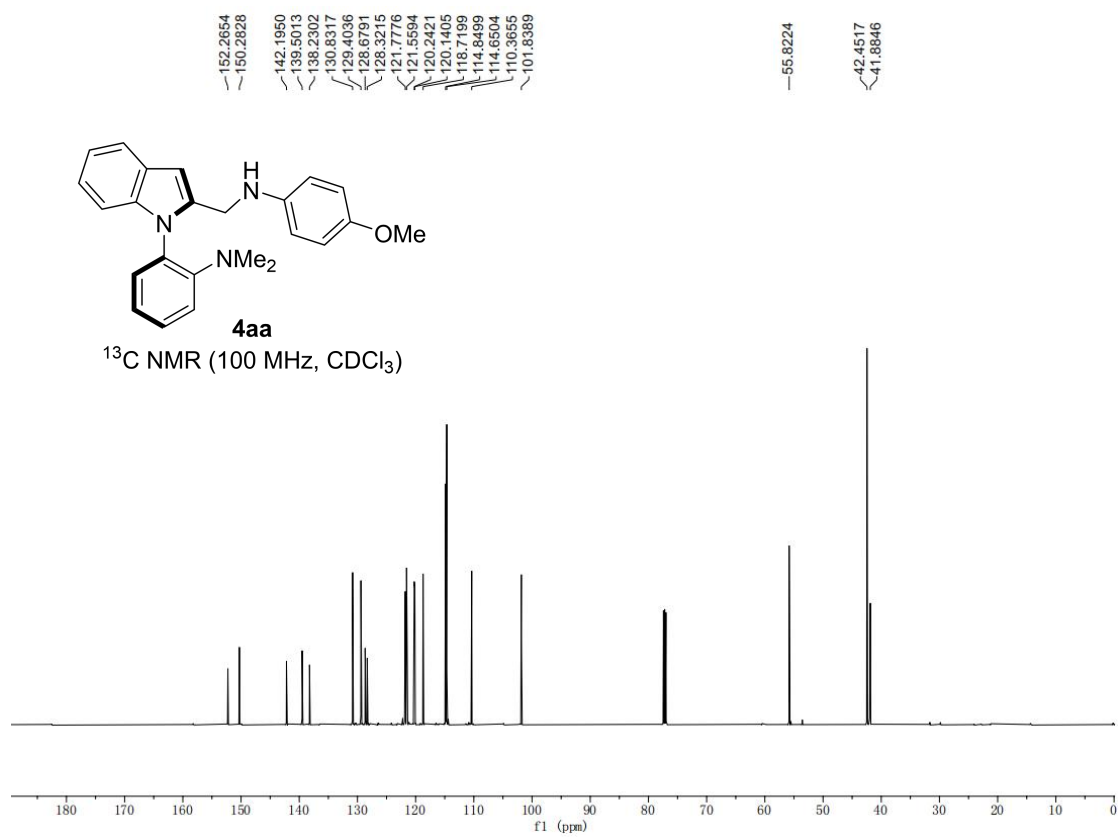

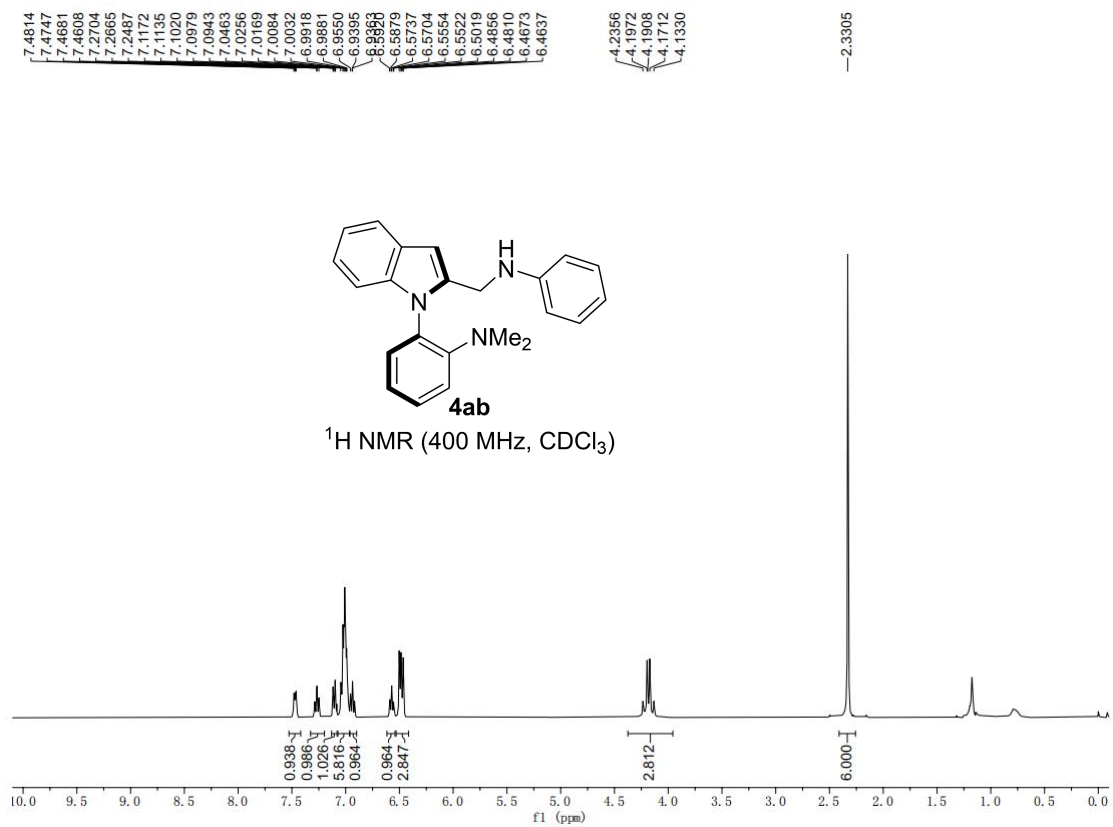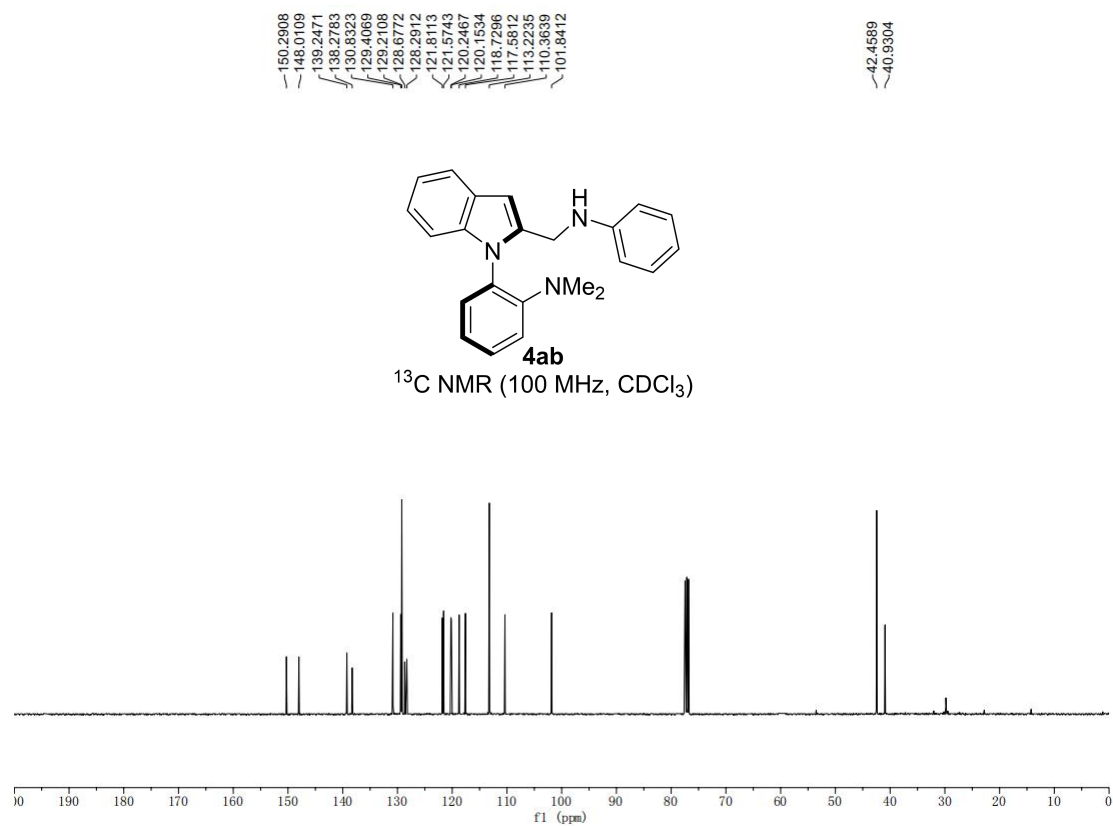

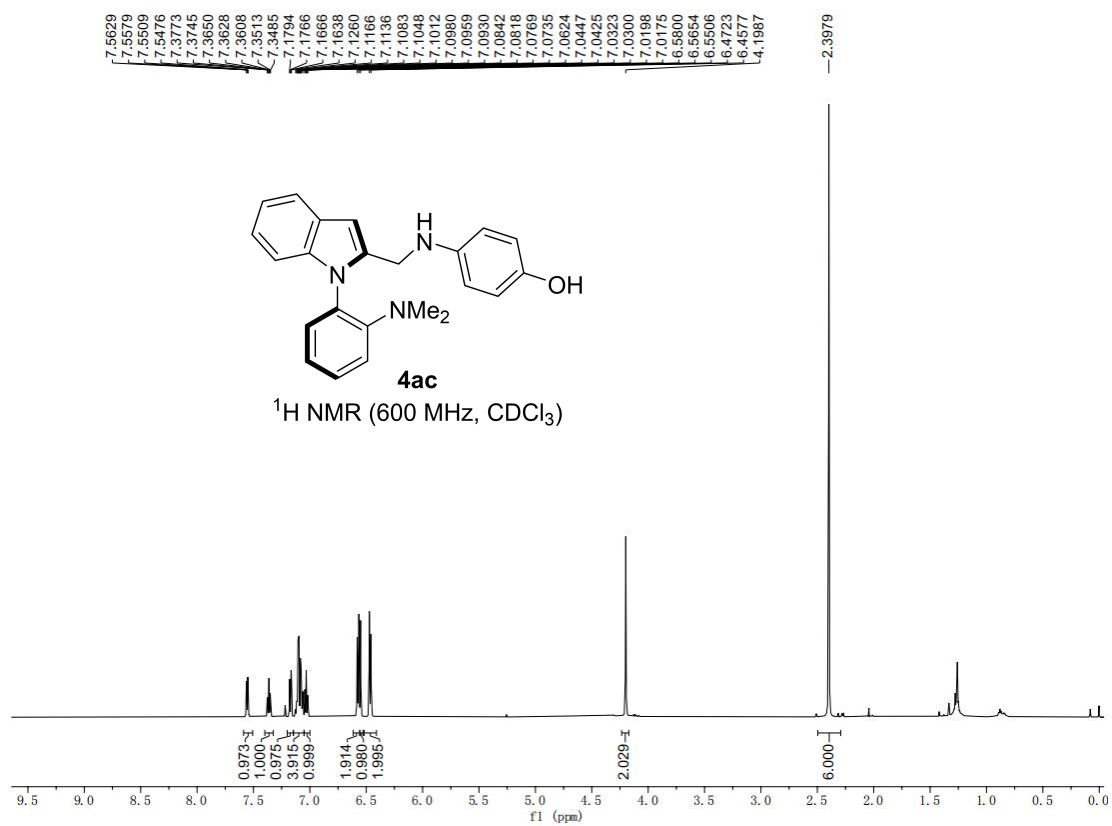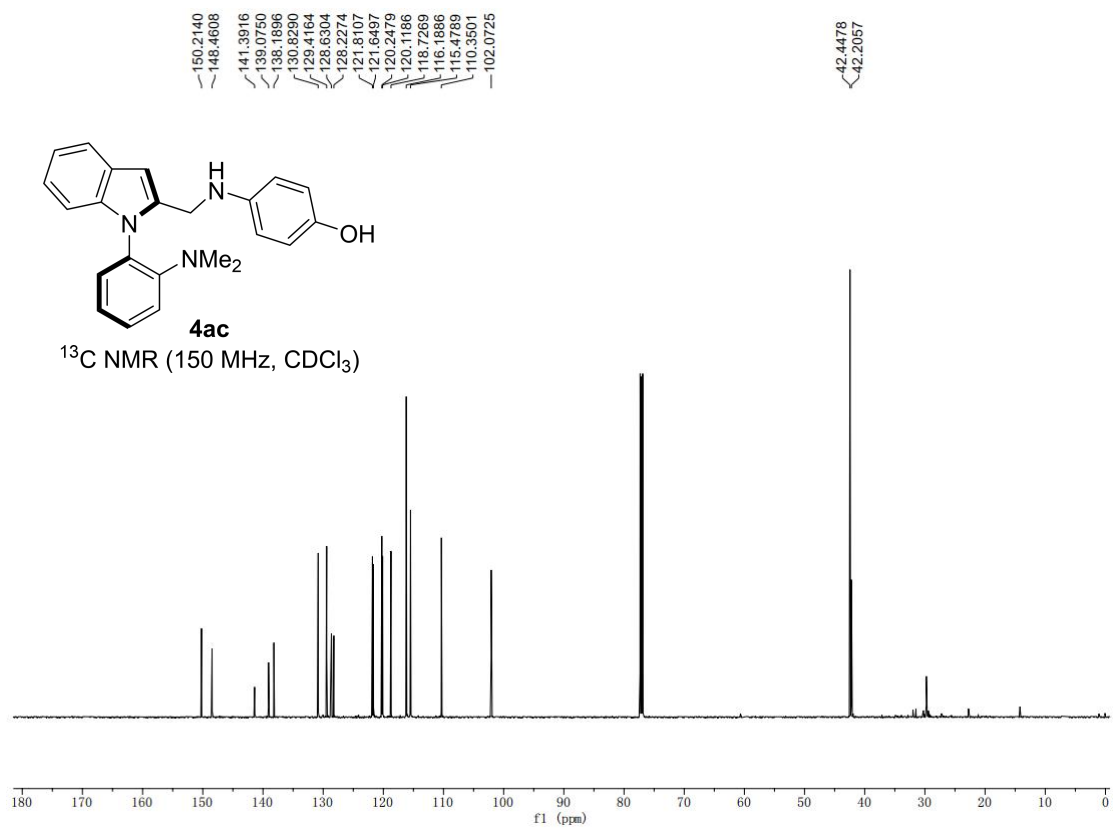

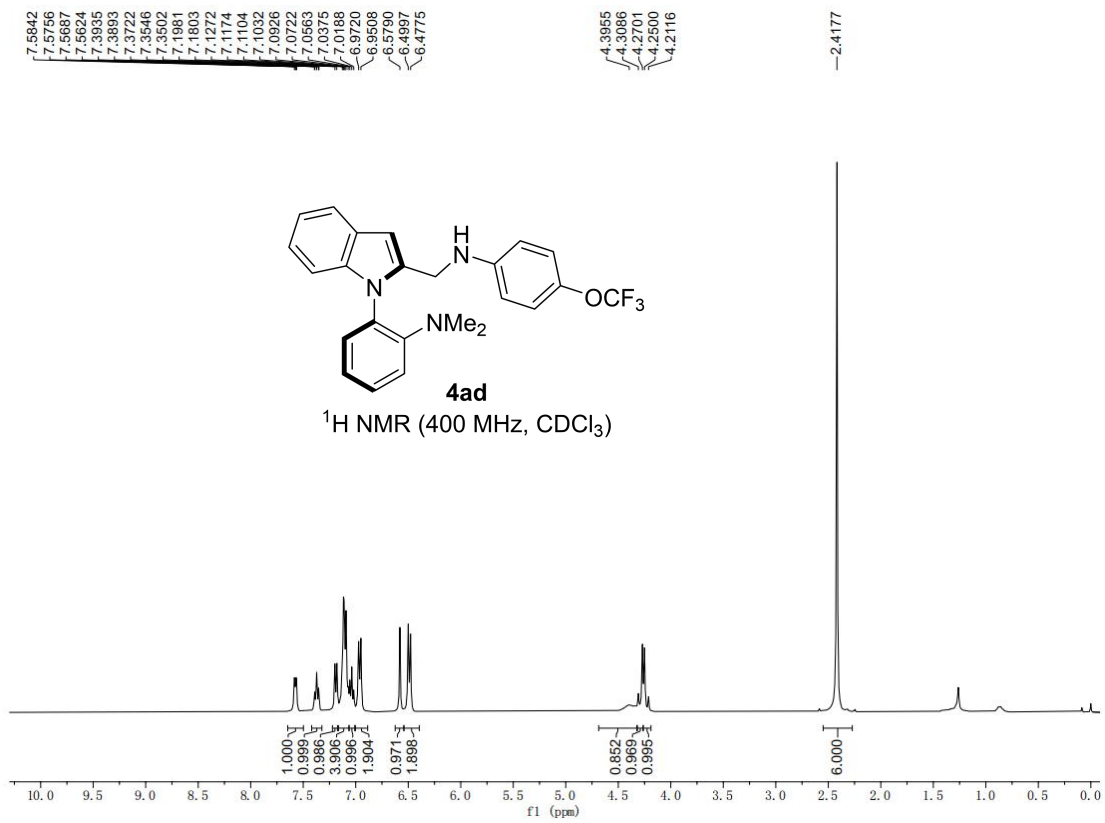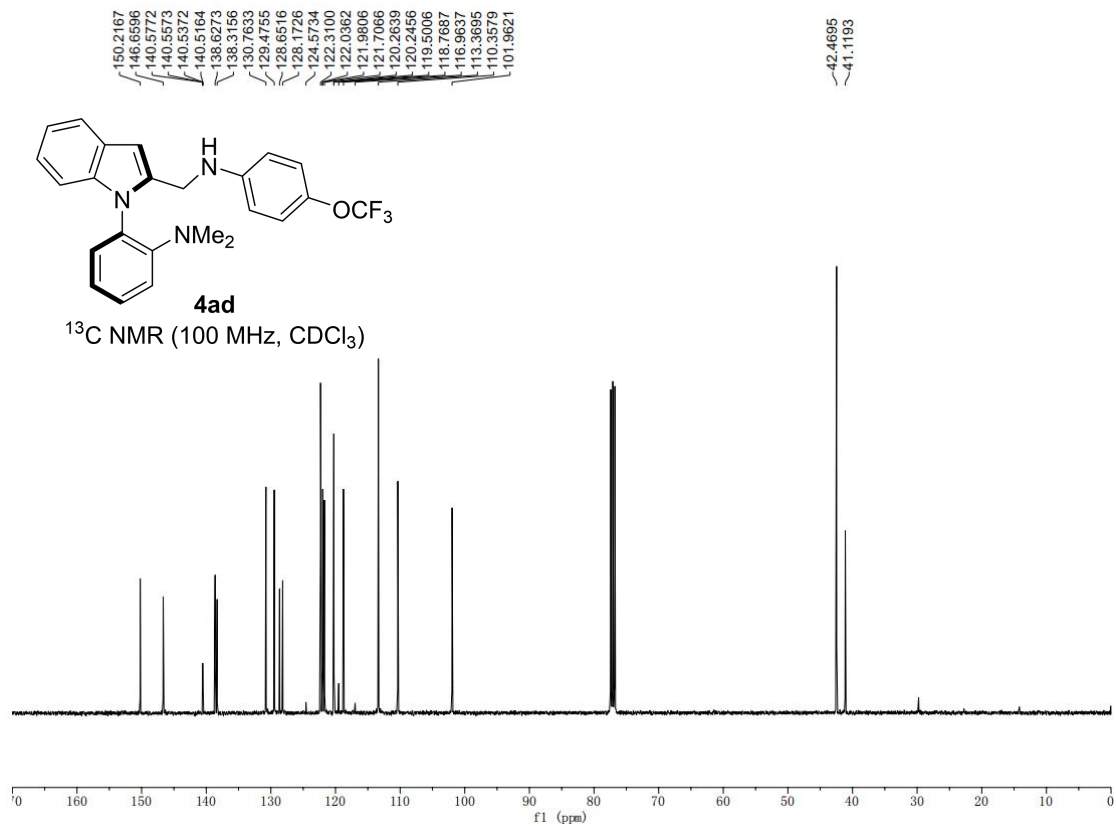



—58.3560

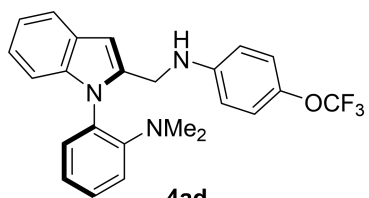

$^{19}\text{F}$  NMR (376 MHz,  $\text{CDCl}_3$ )

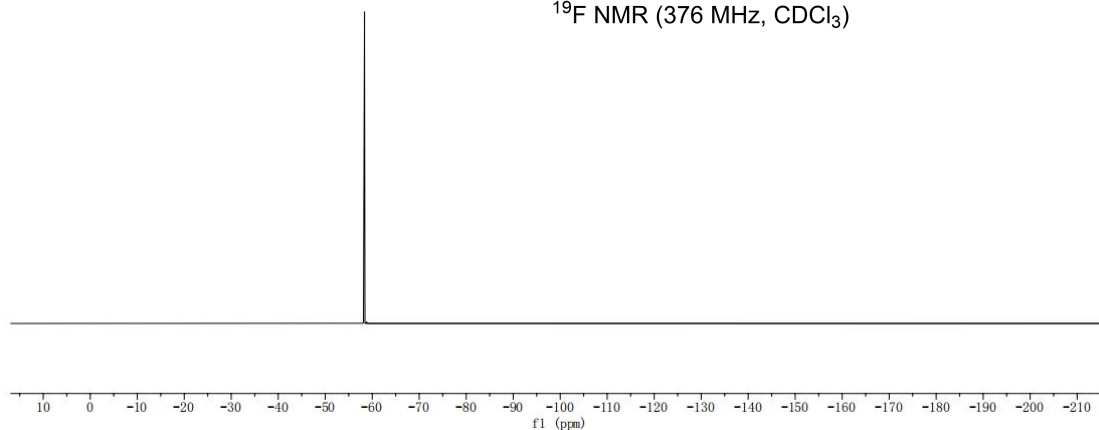

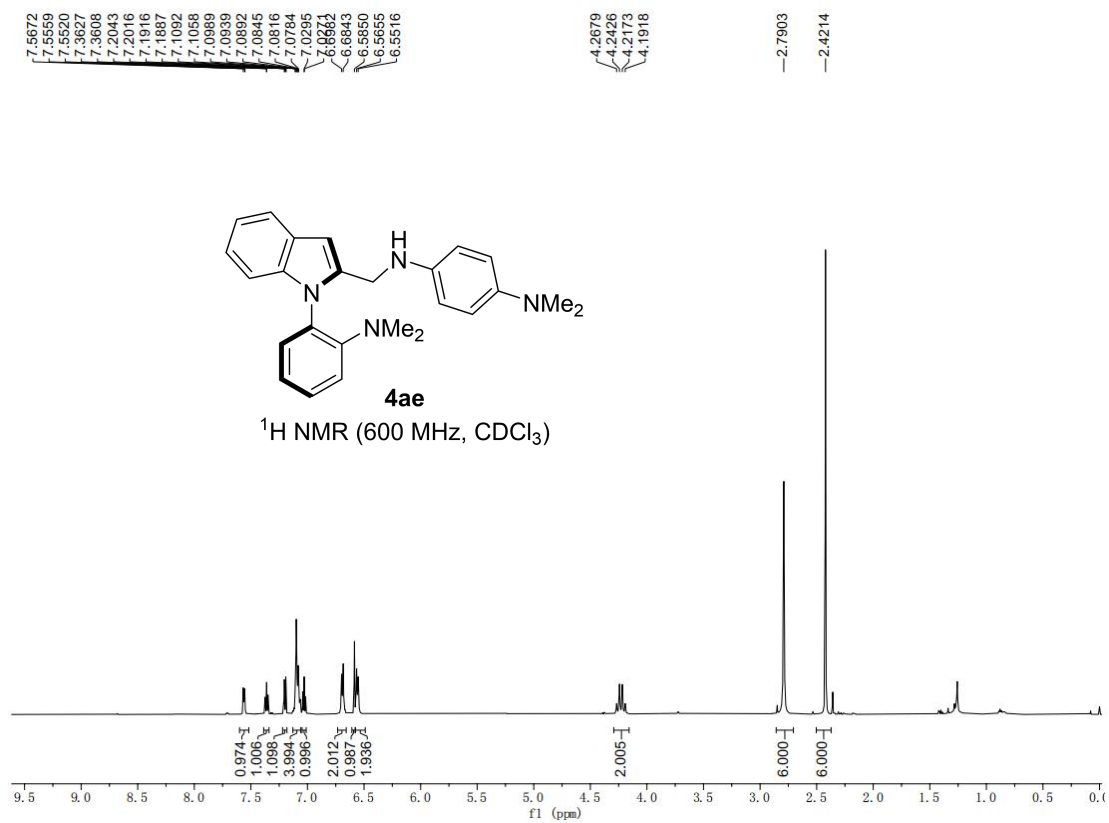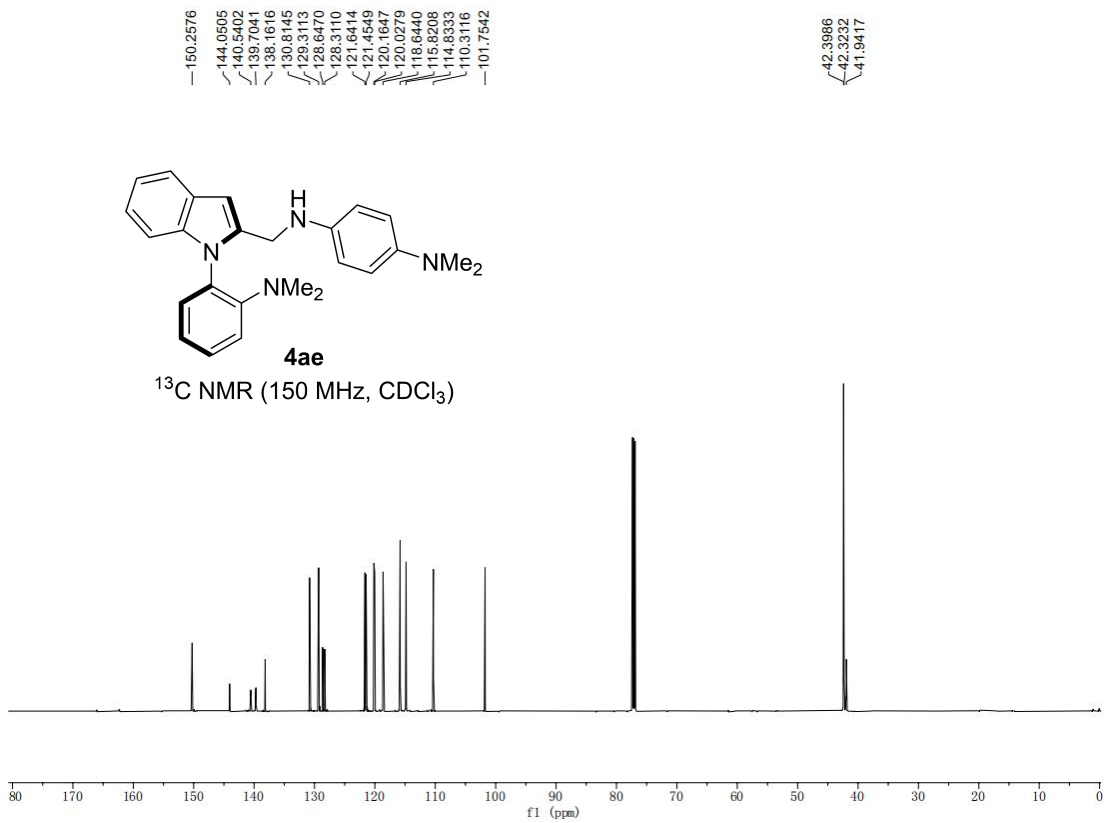

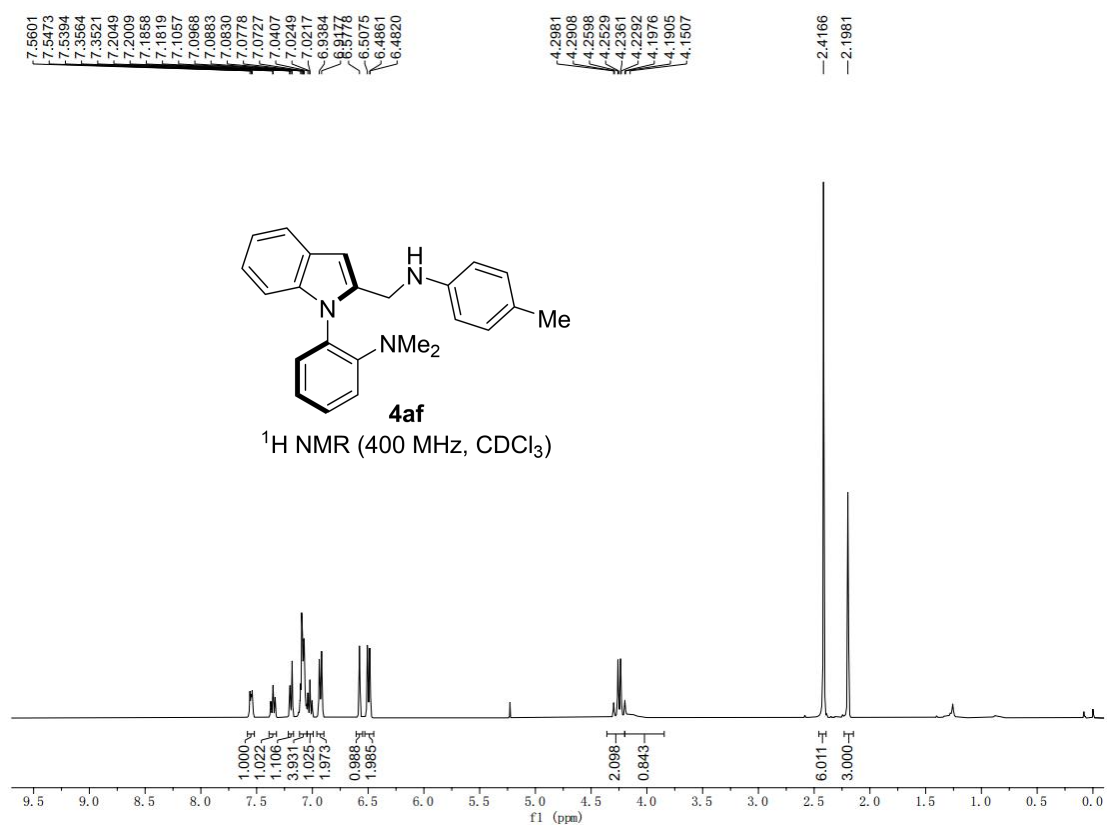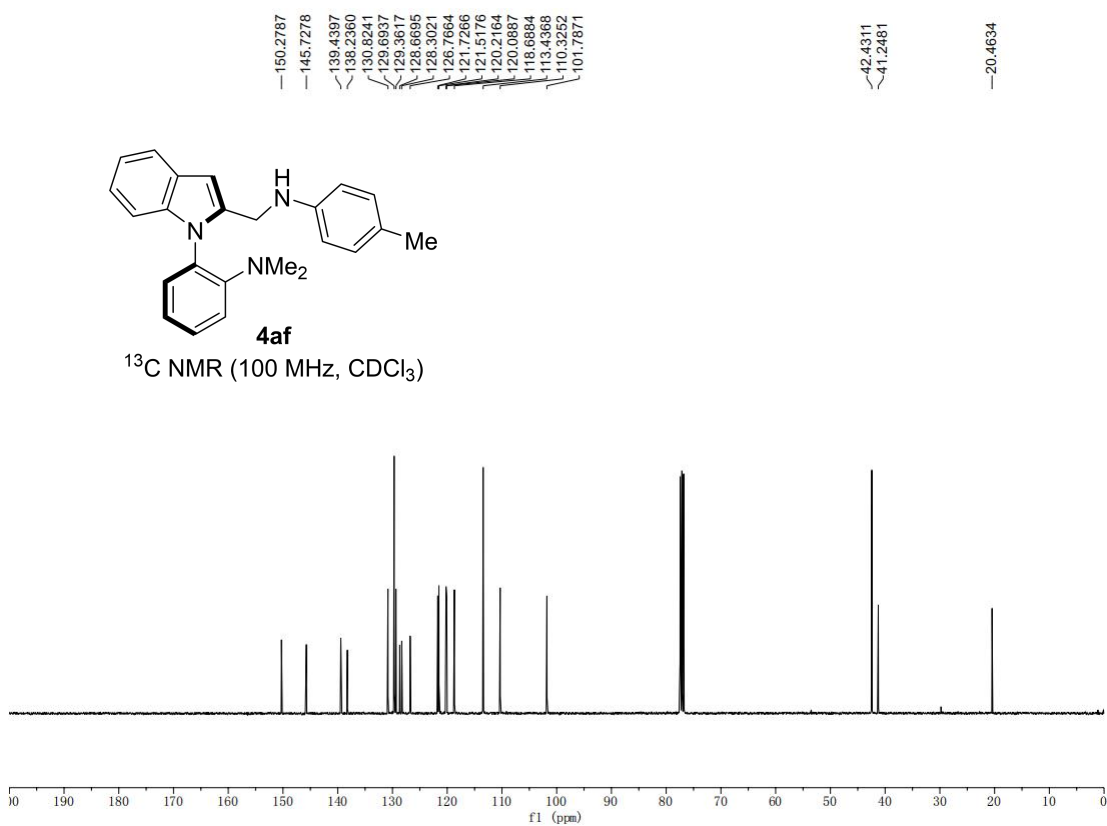

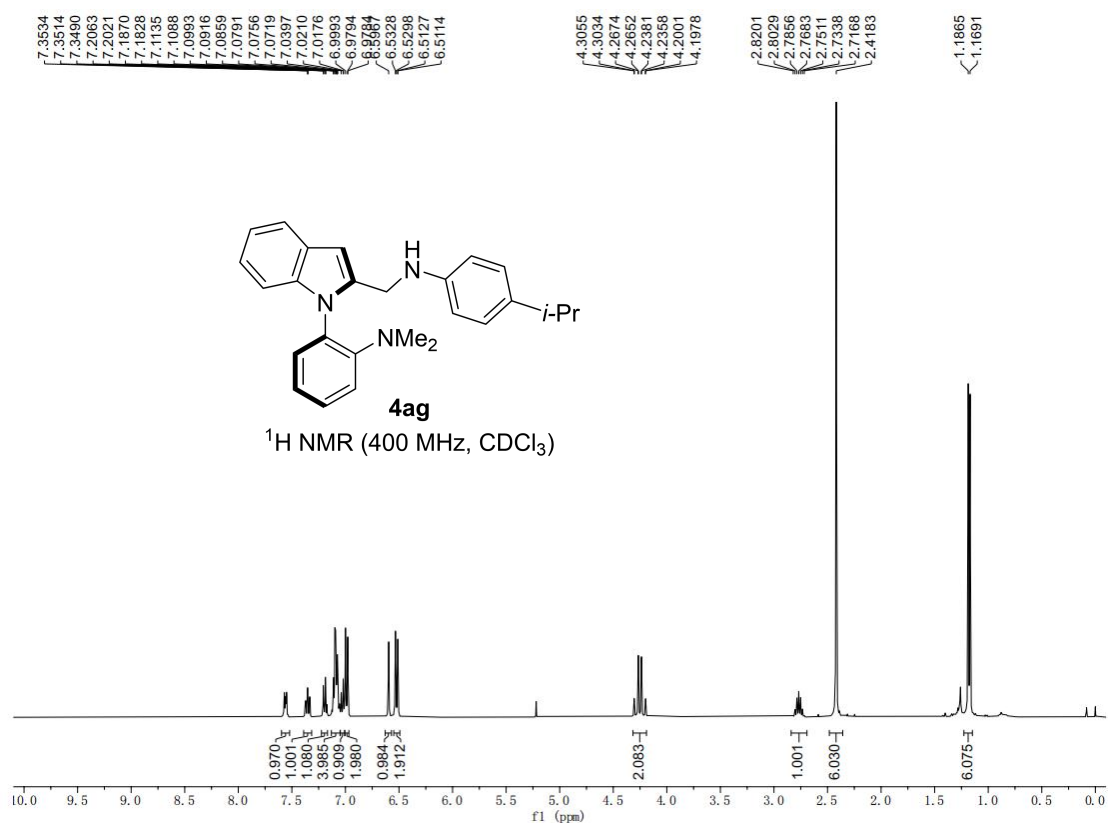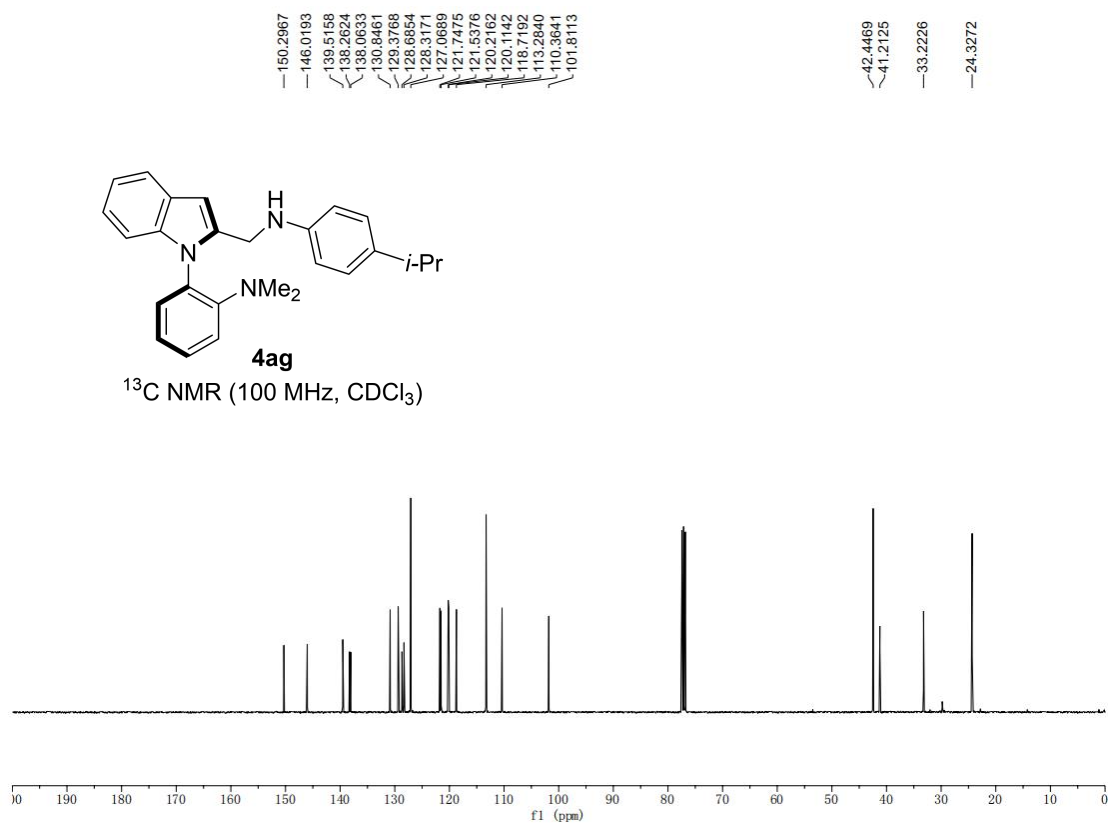

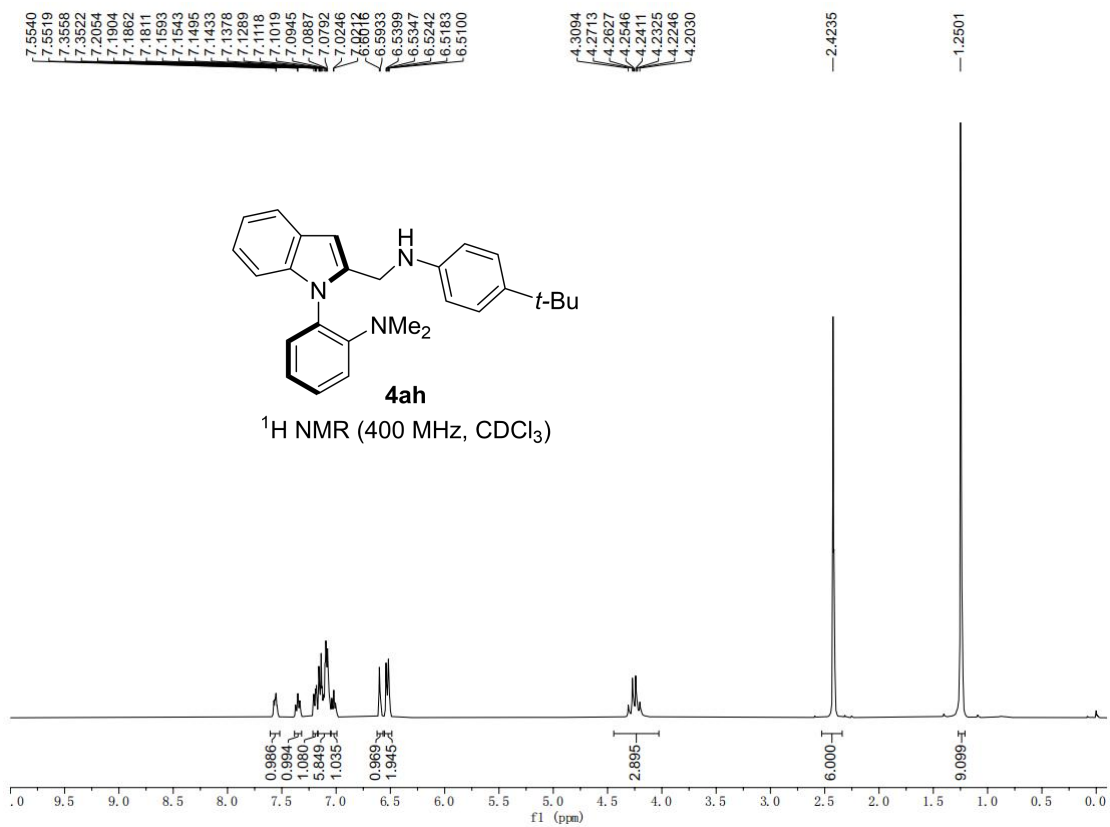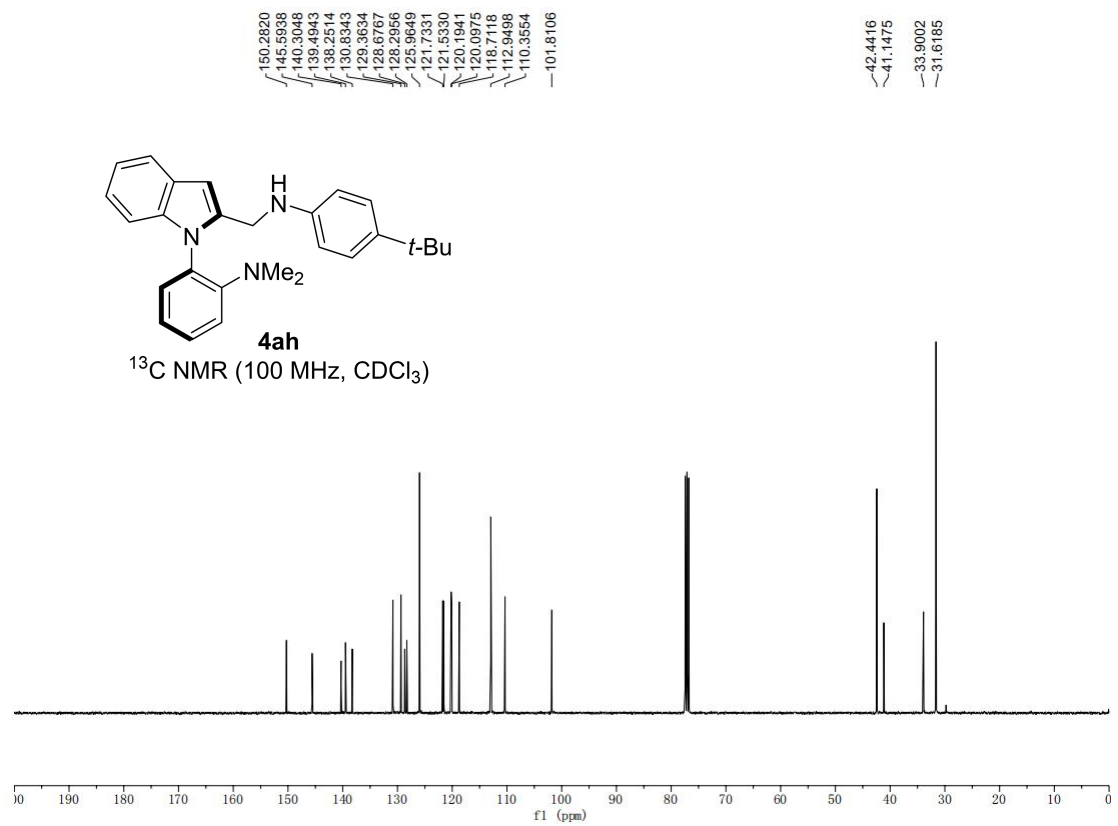

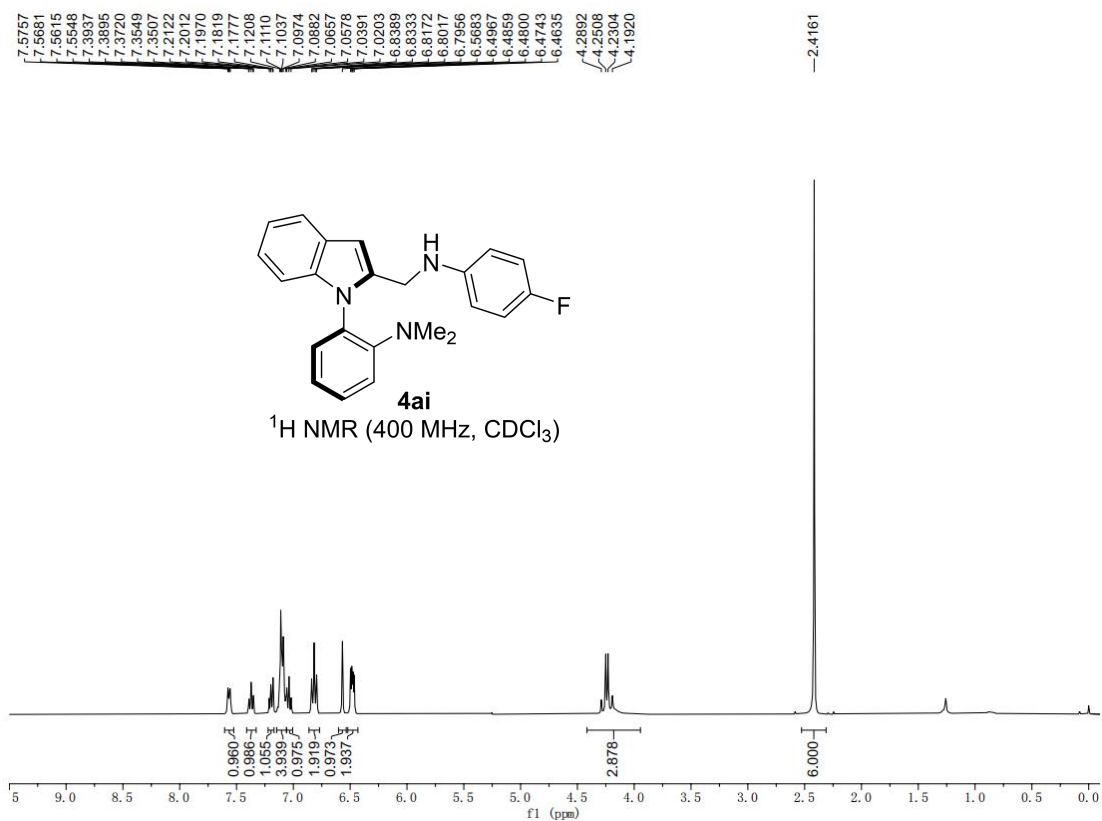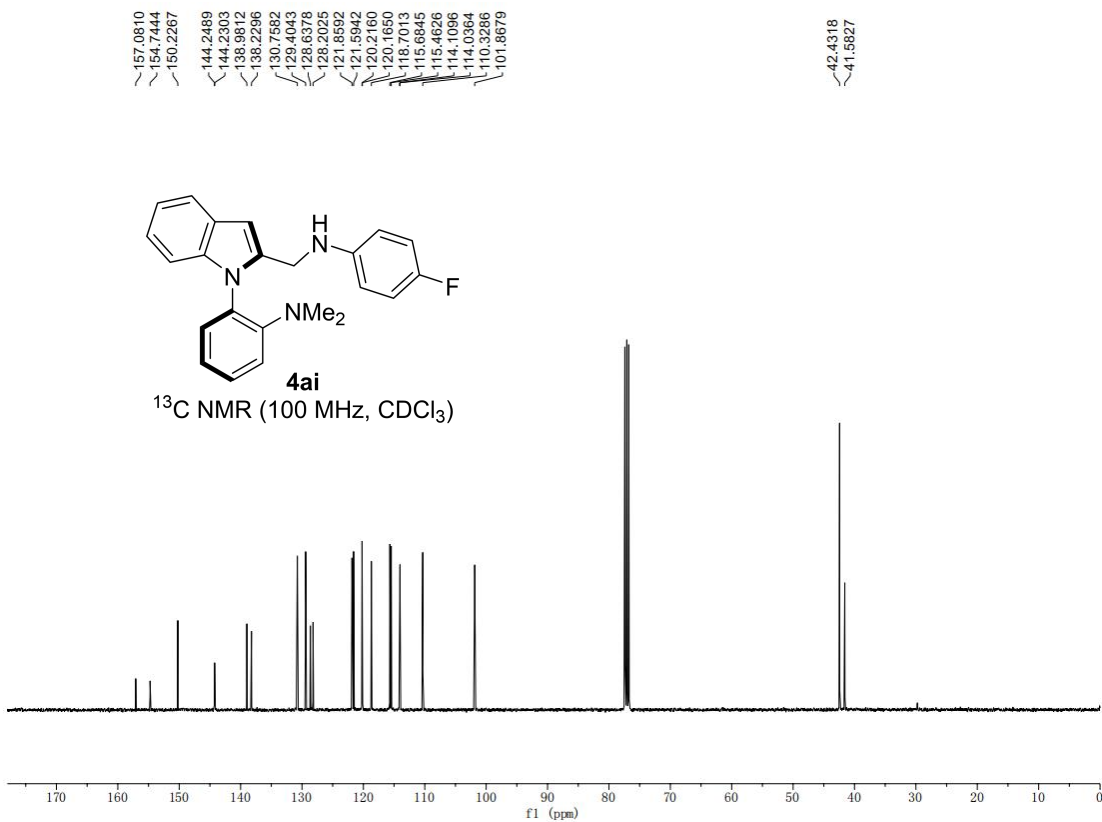

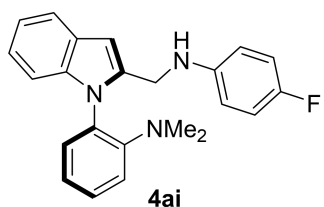

<sup>19</sup>F NMR (376 MHz, CDCl<sub>3</sub>)

-127.8260

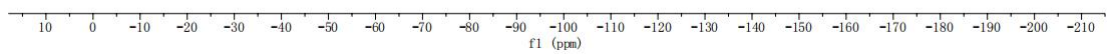

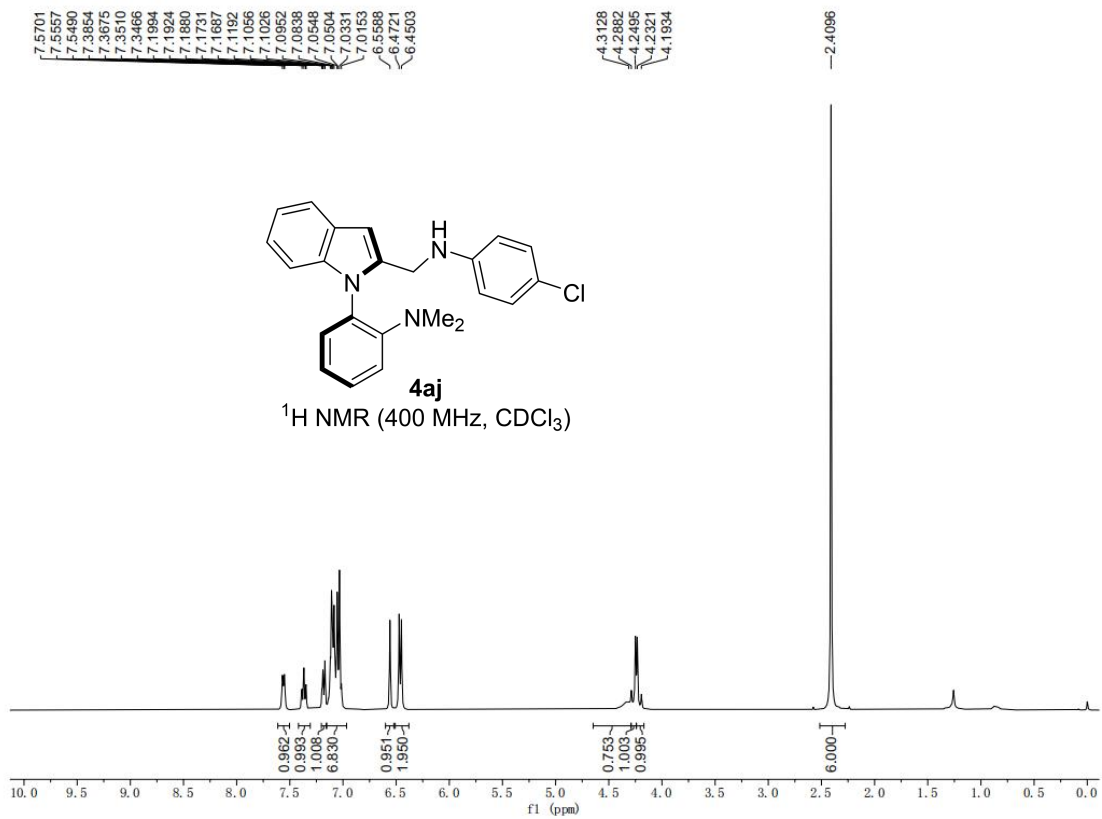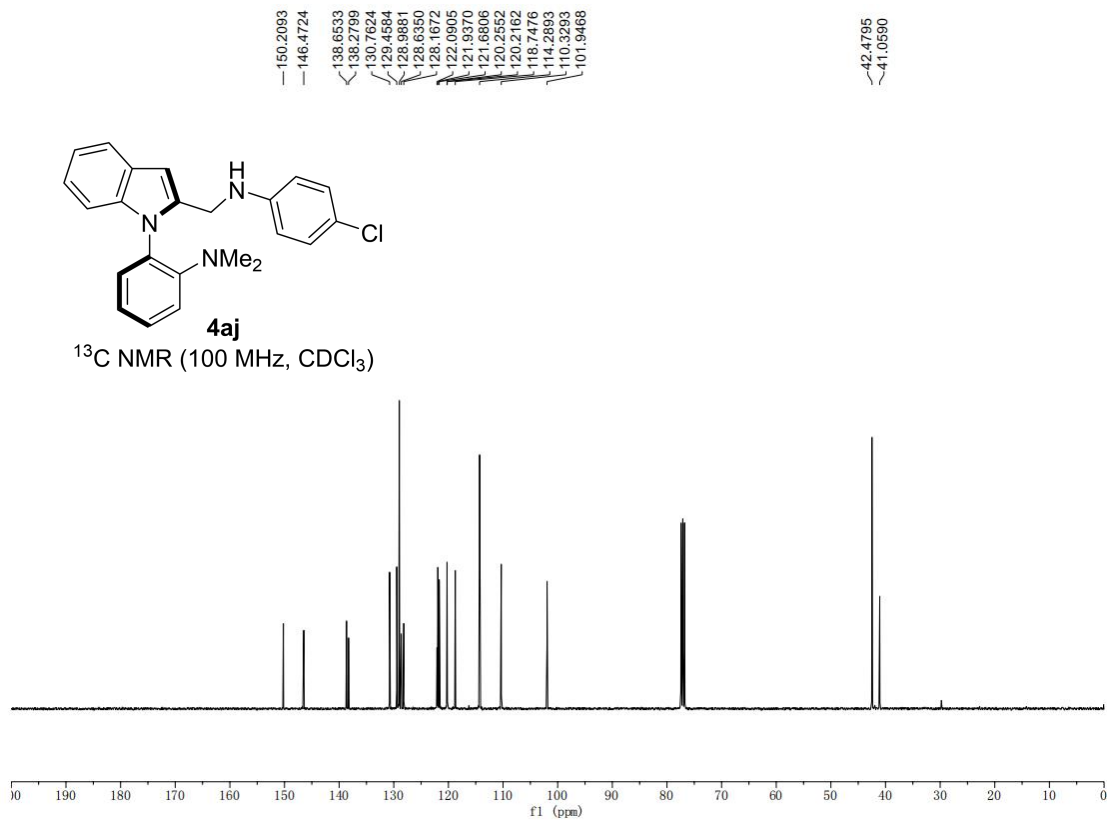



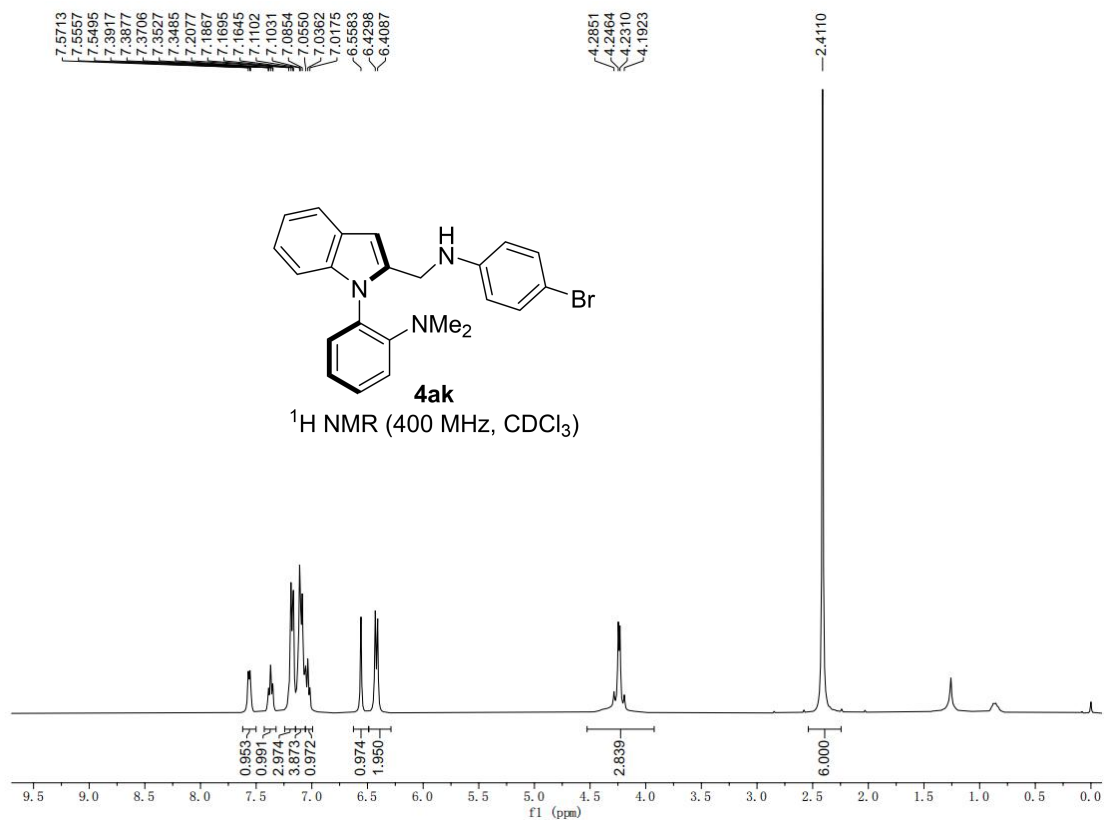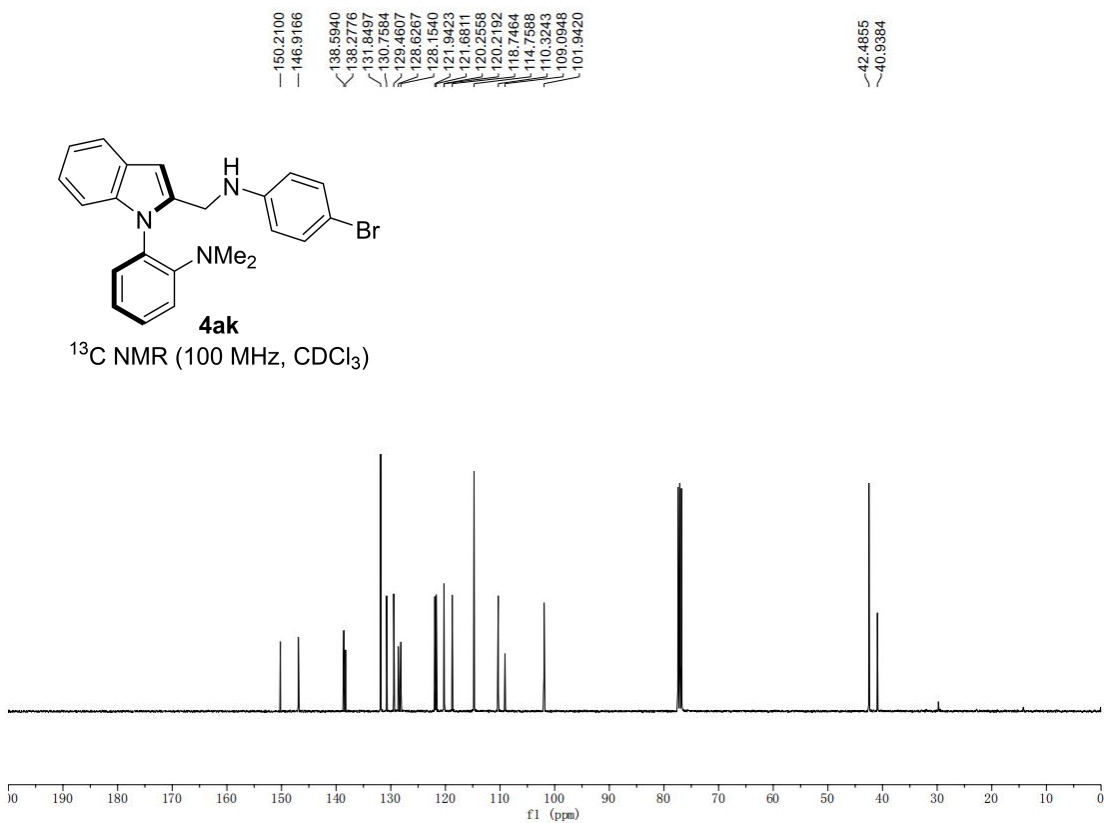

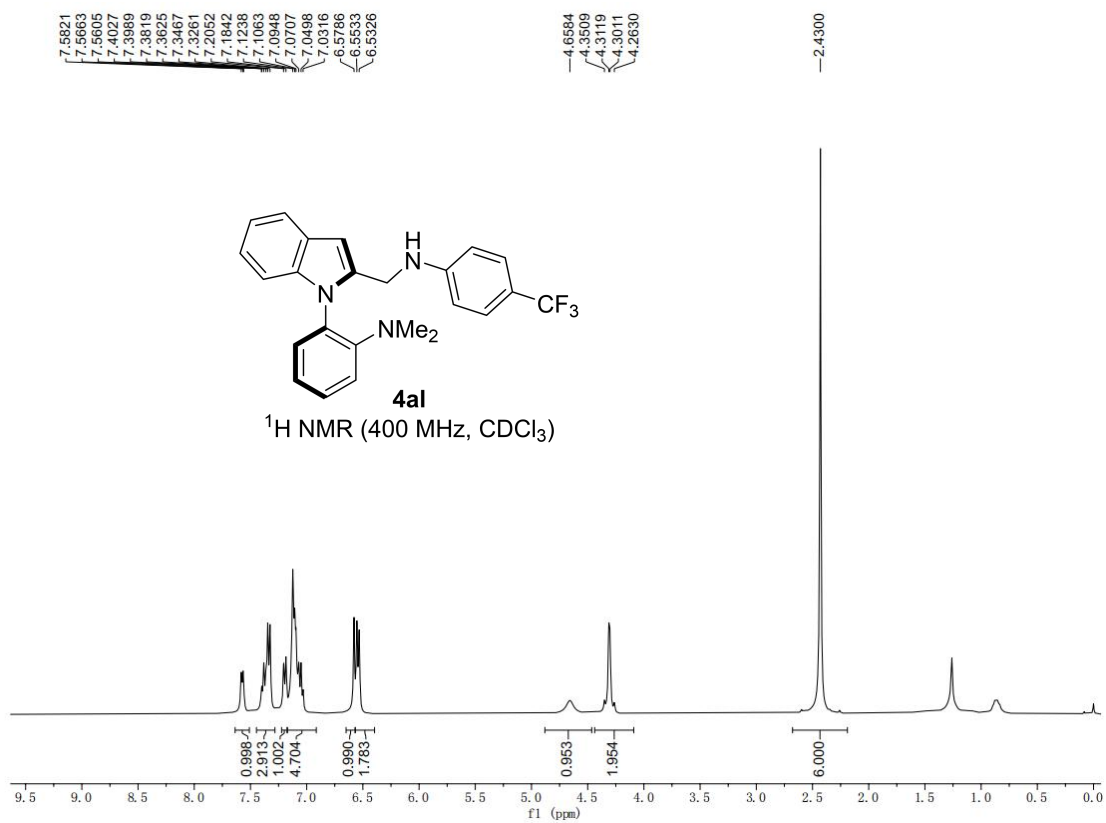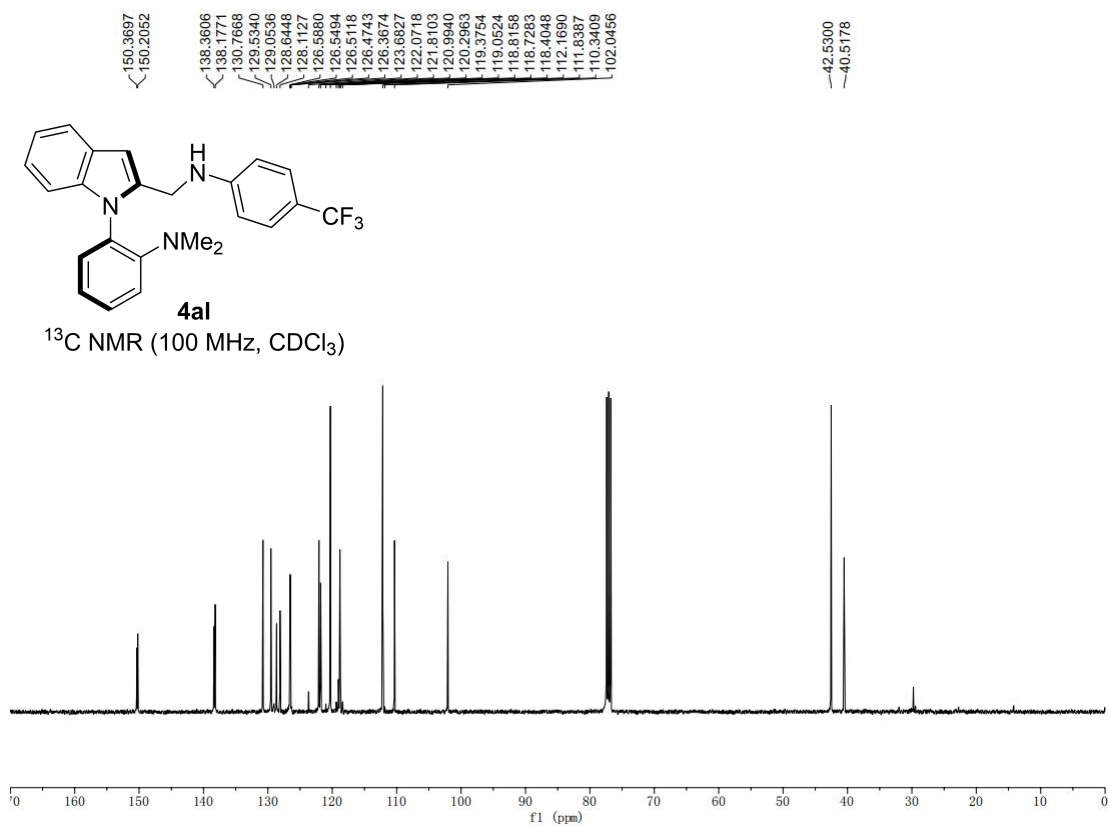

60.9055

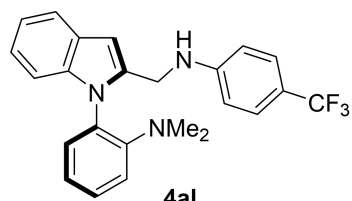

<sup>19</sup>F NMR (376 MHz, CDCl<sub>3</sub>)

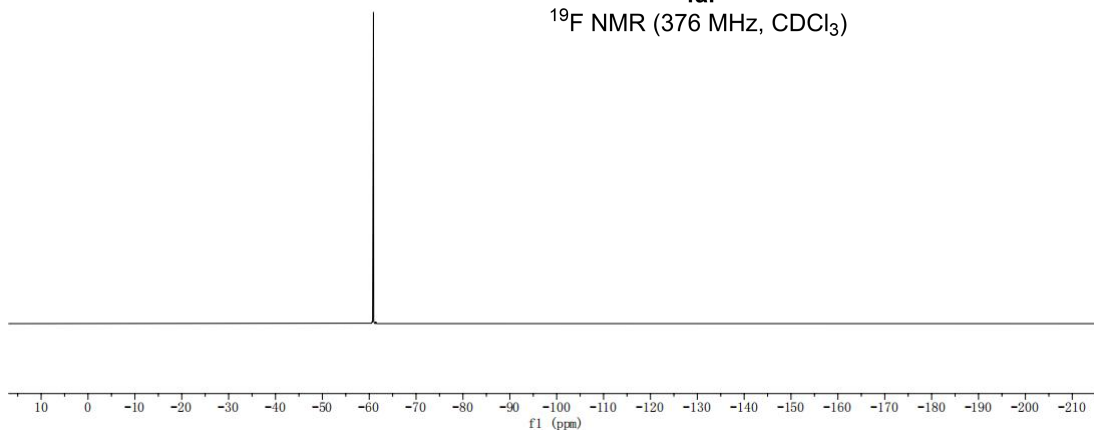

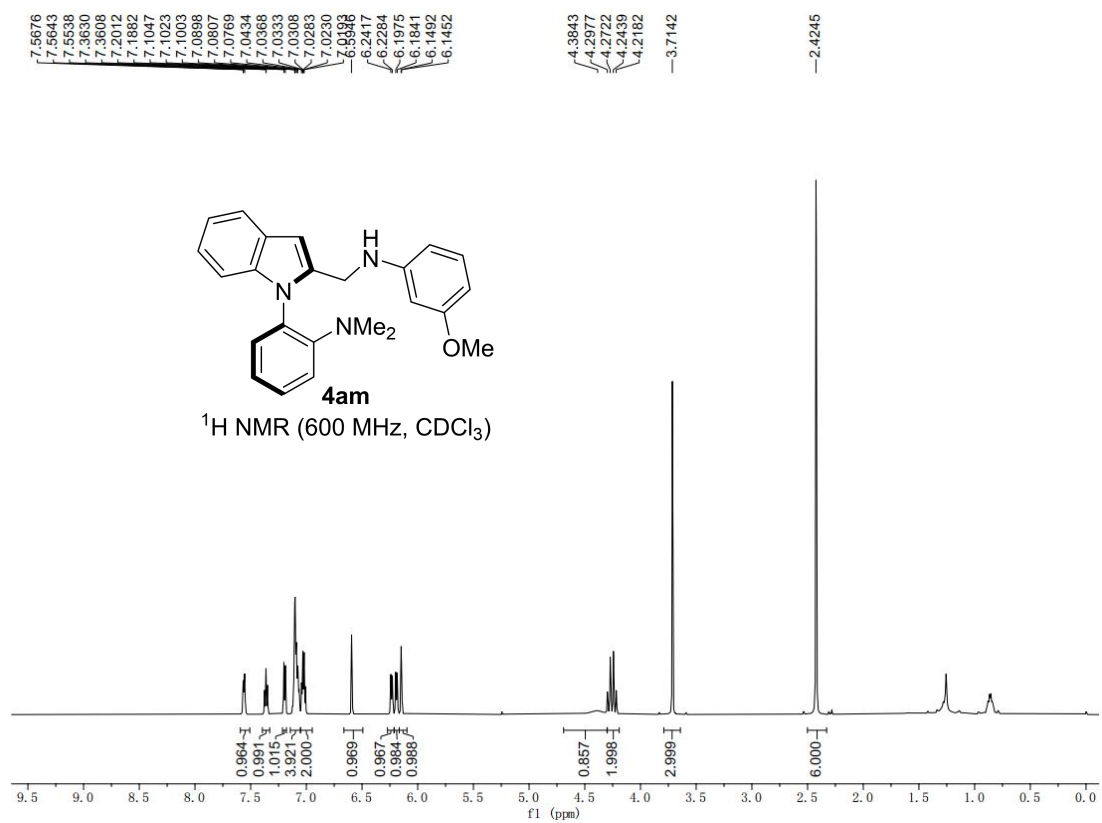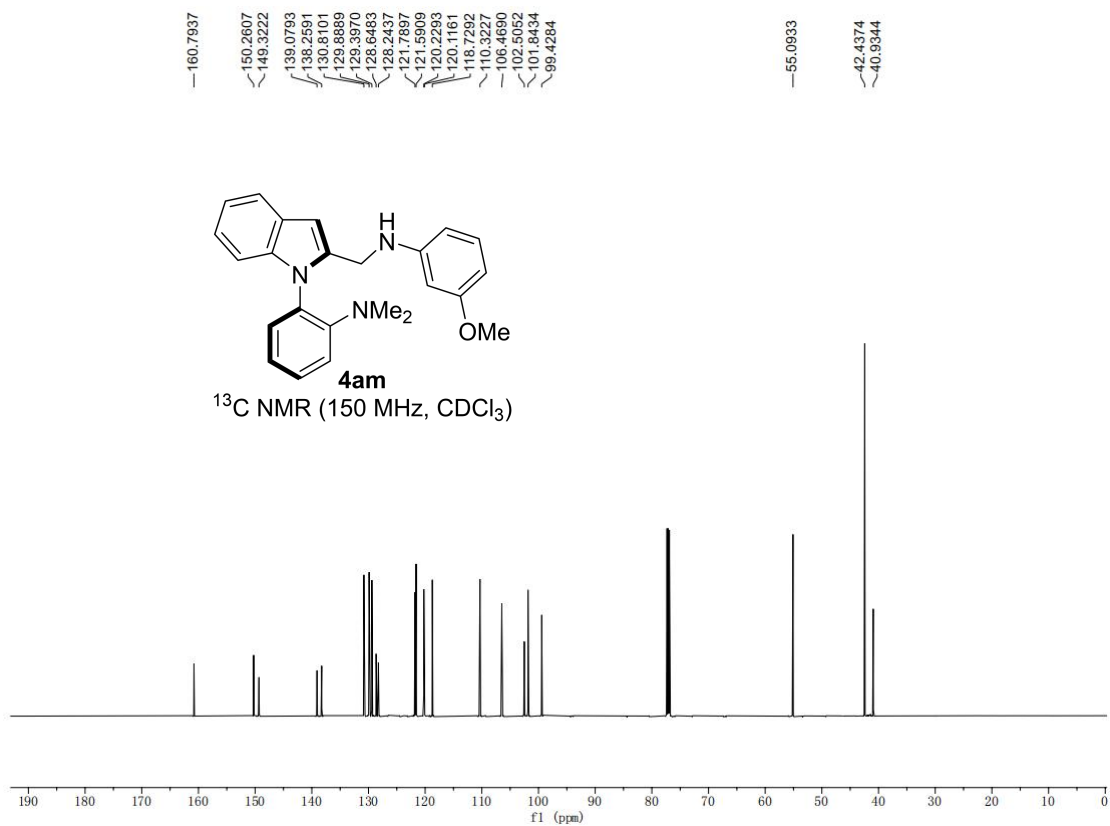

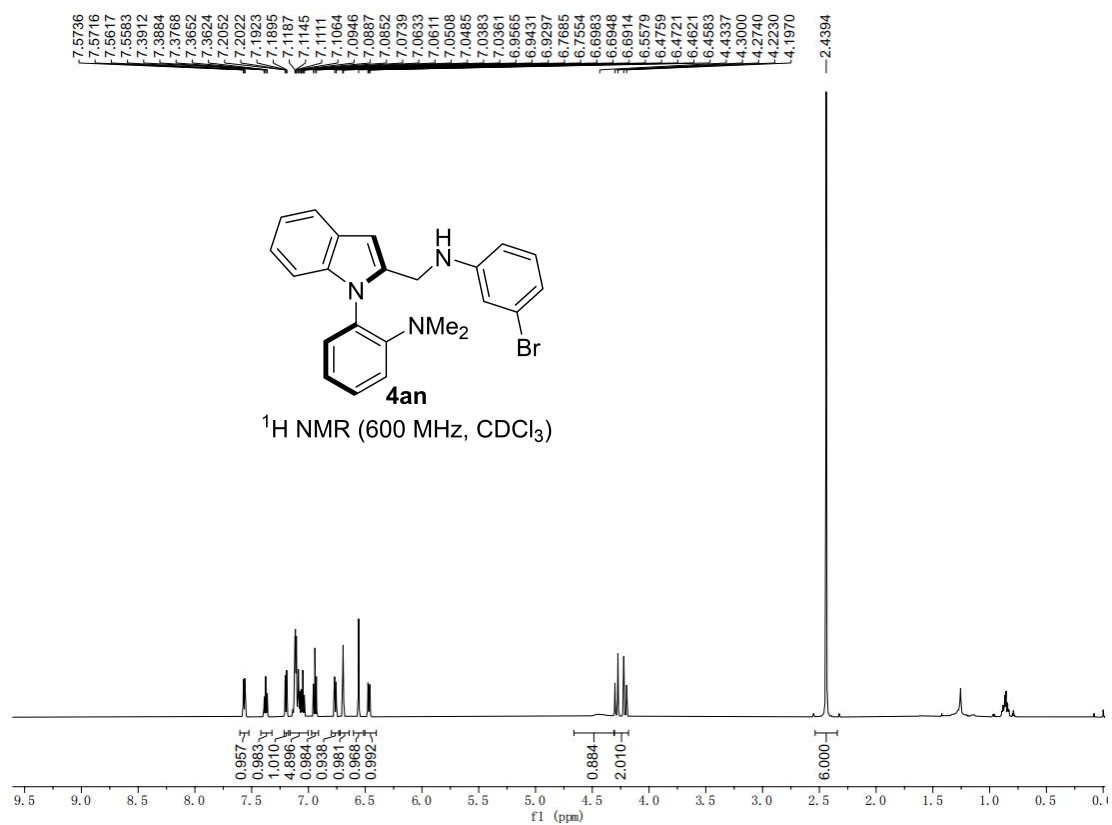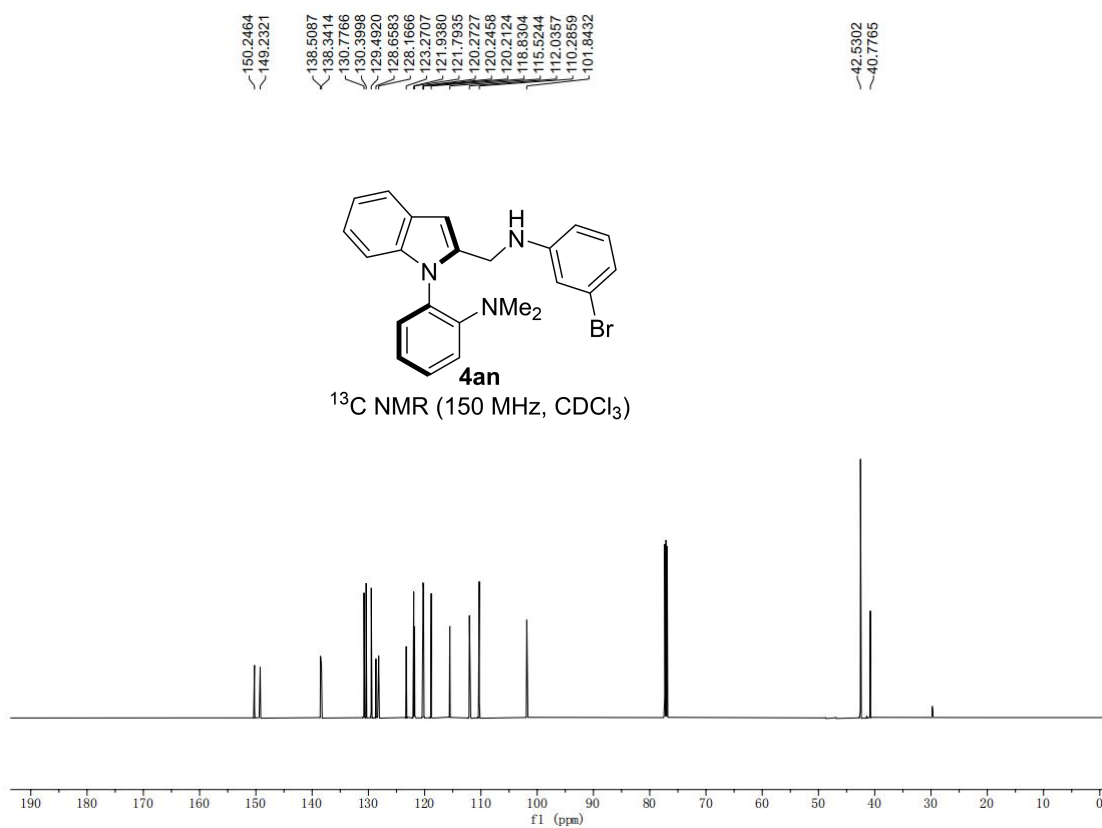

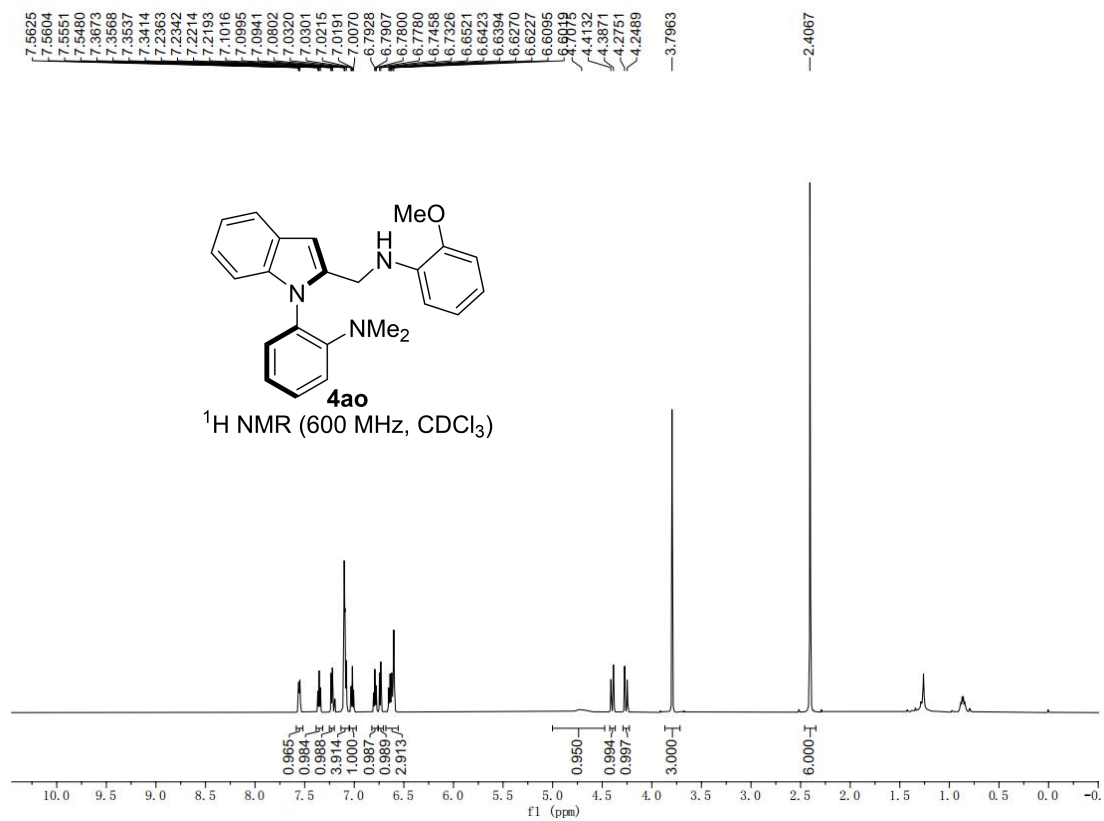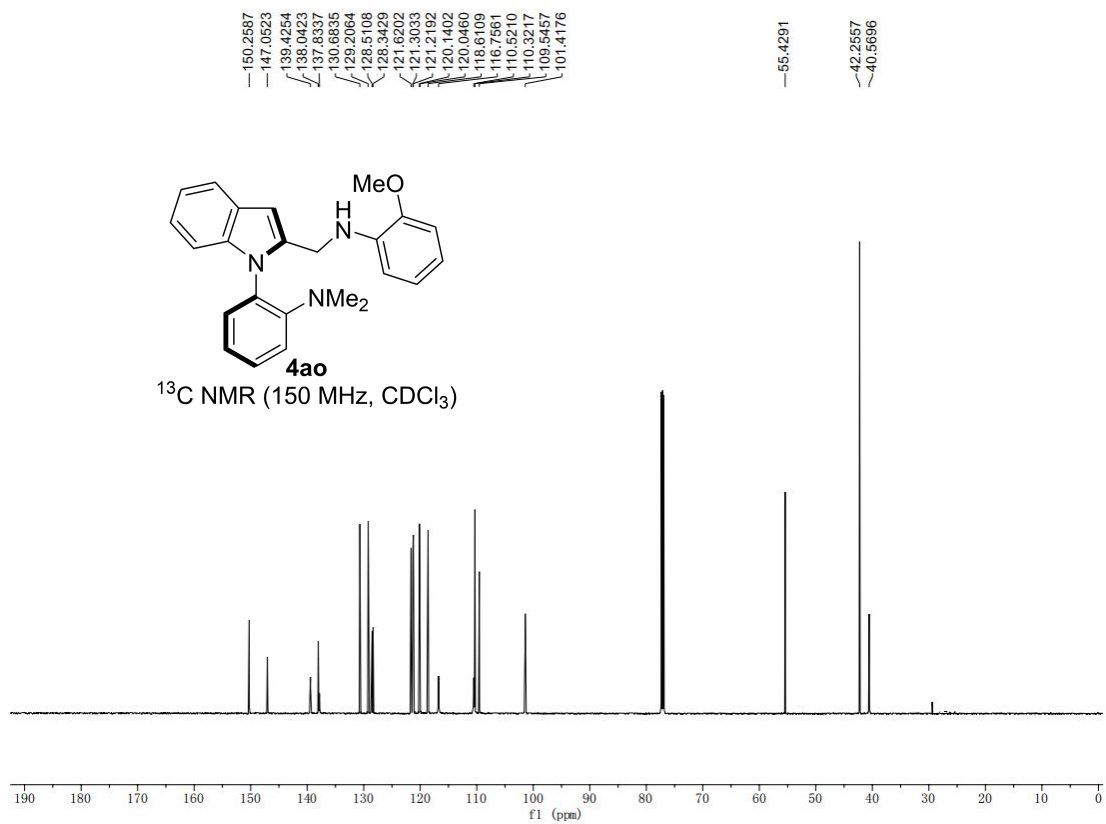

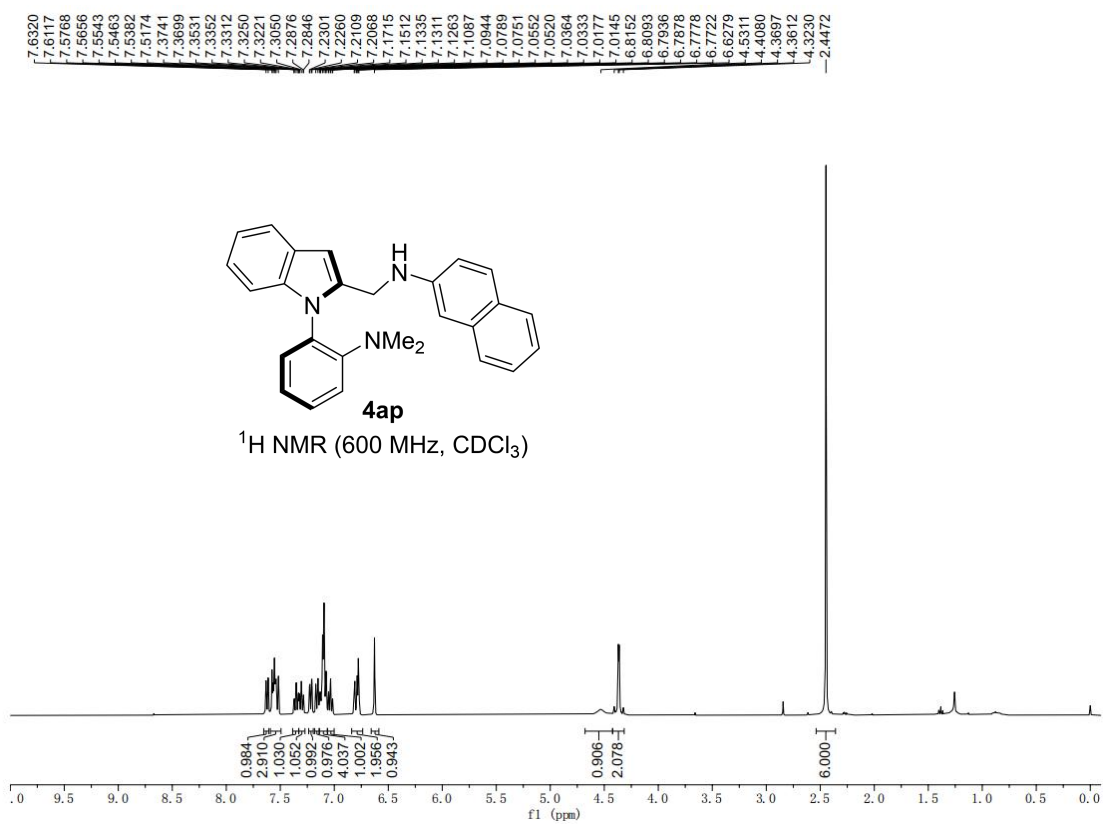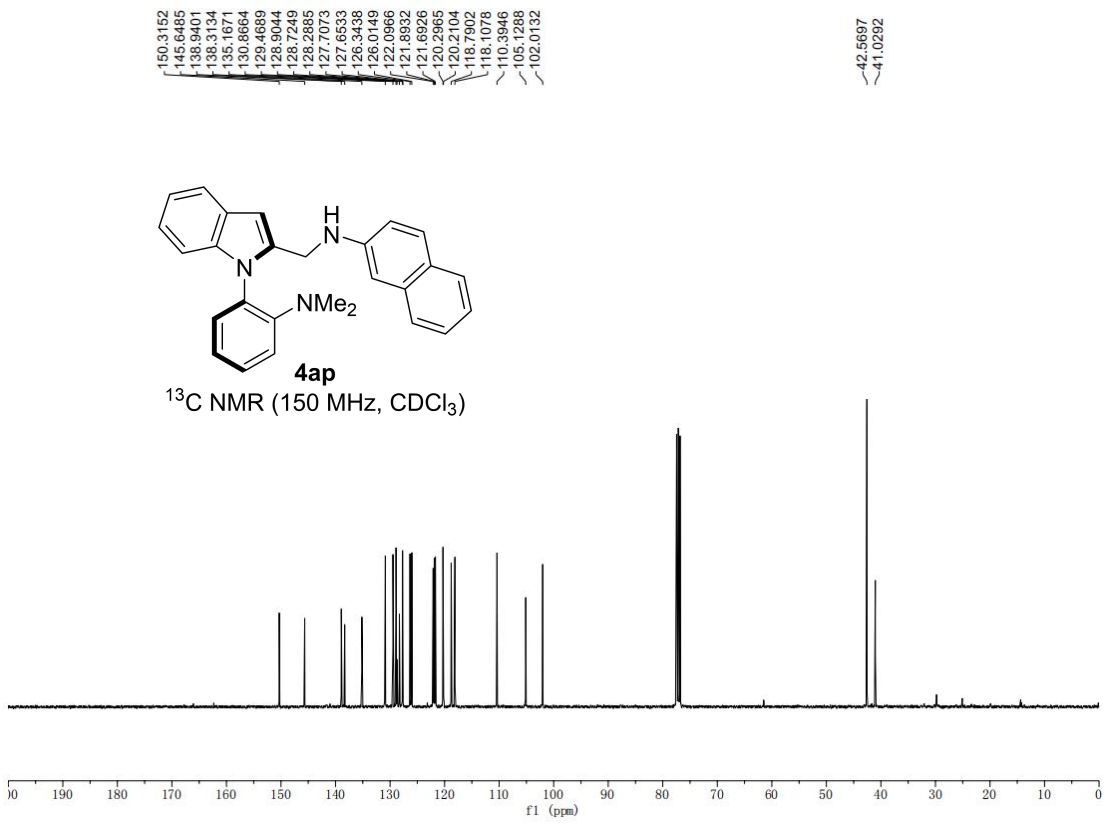

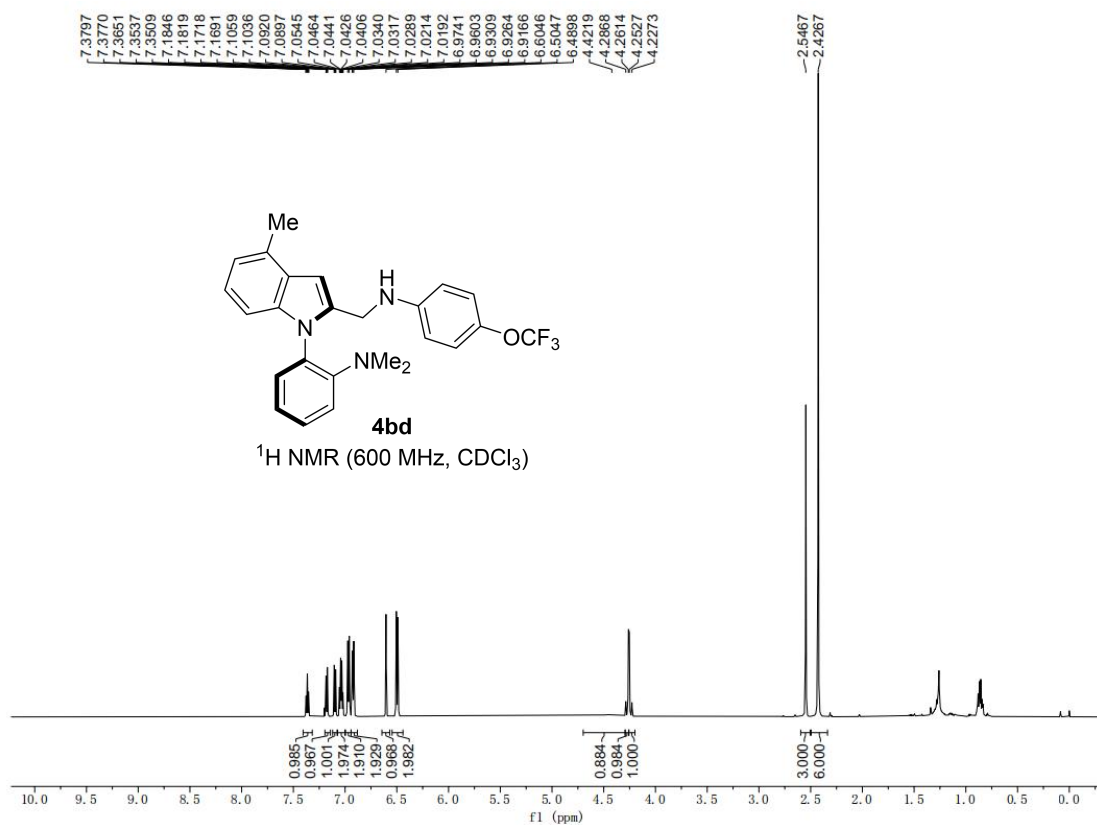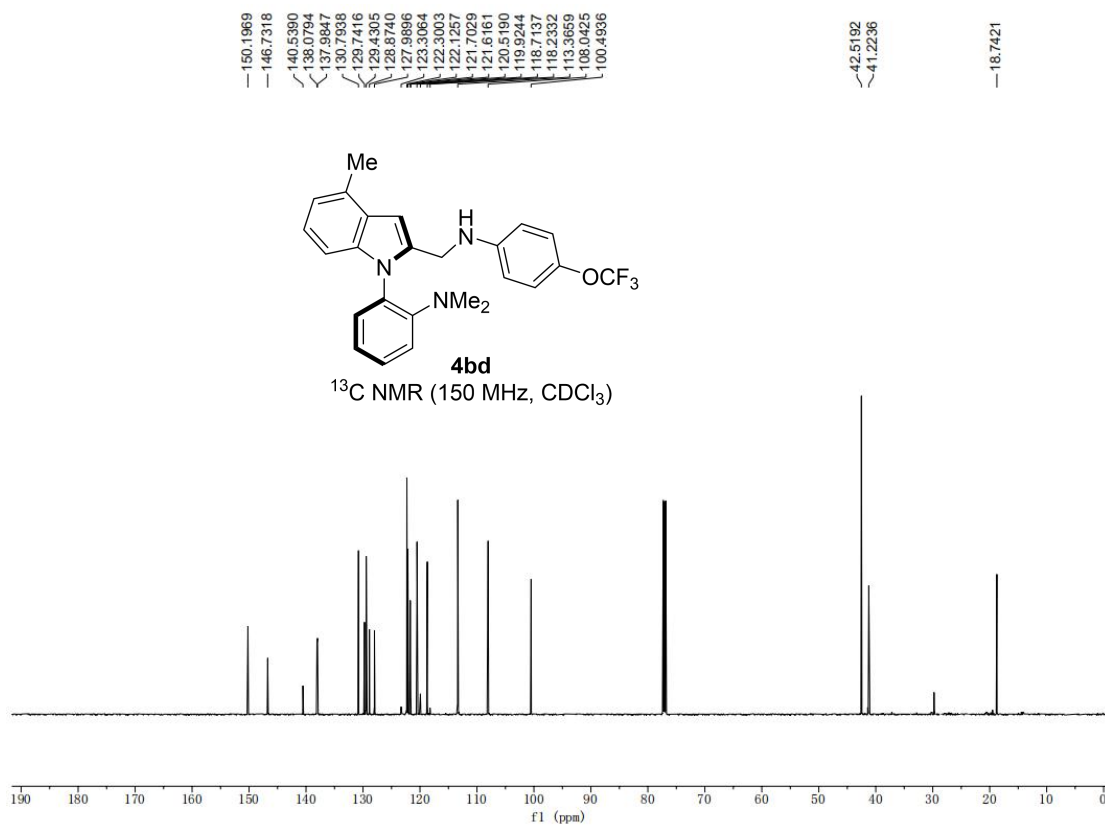



---58.3714

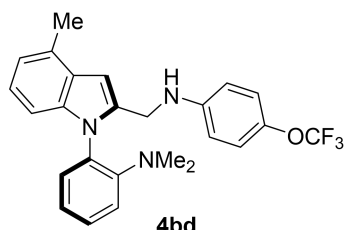

**4bd**  
<sup>19</sup>F NMR (565 MHz, CDCl<sub>3</sub>)

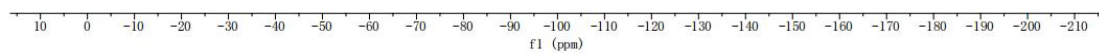

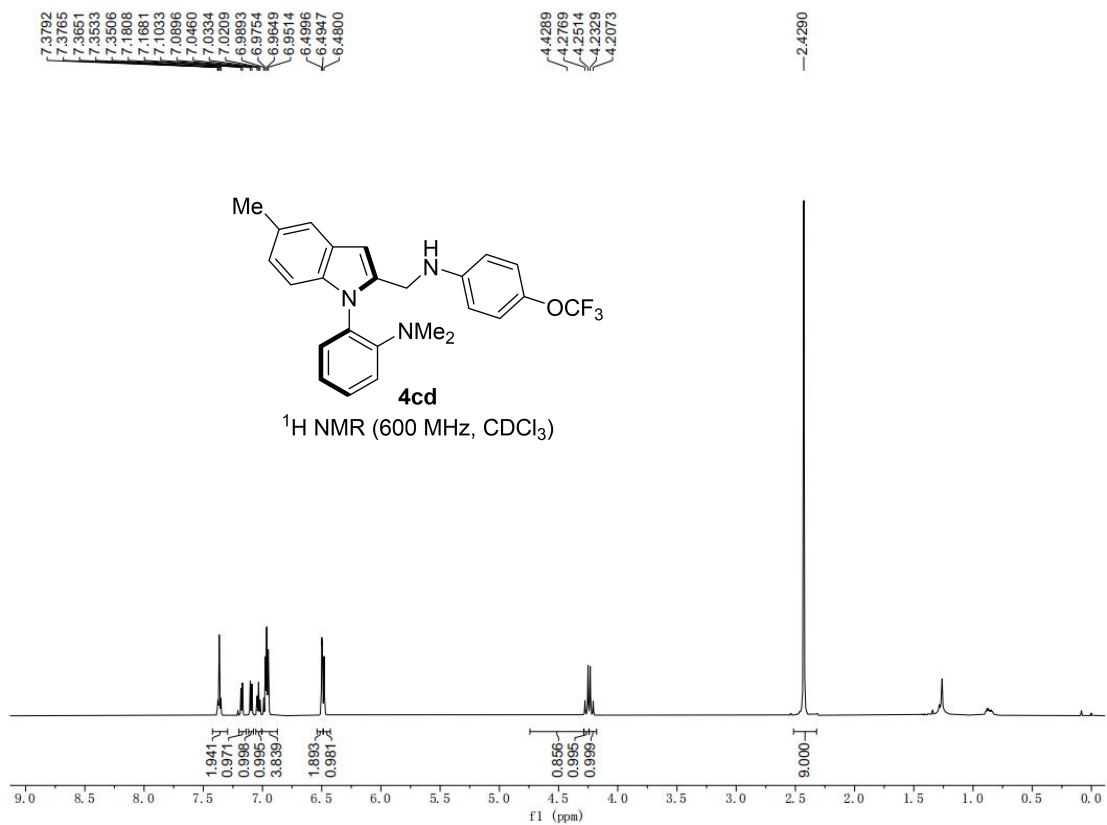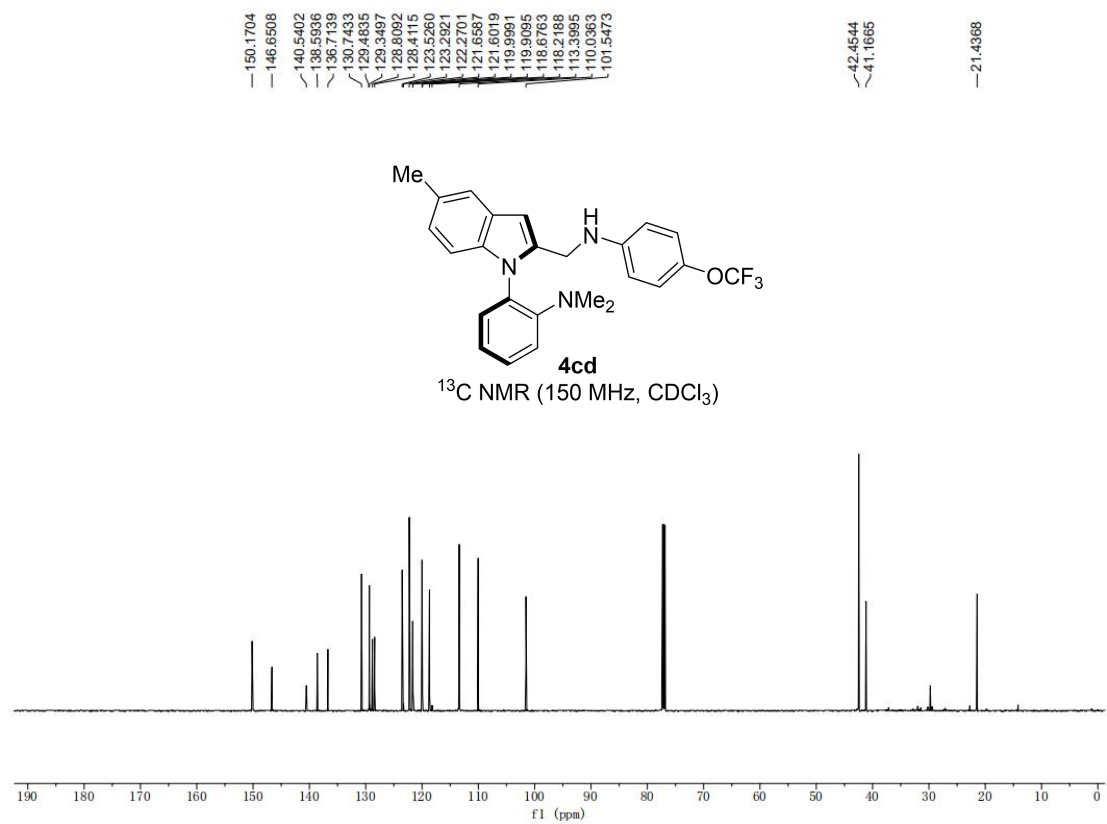

—58.3776

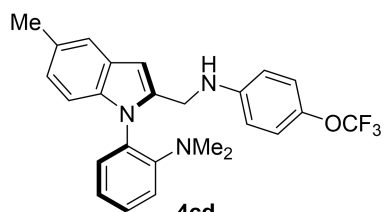

**4cd**  
<sup>19</sup>F NMR (565 MHz, CDCl<sub>3</sub>)

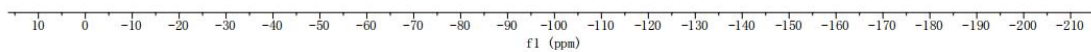

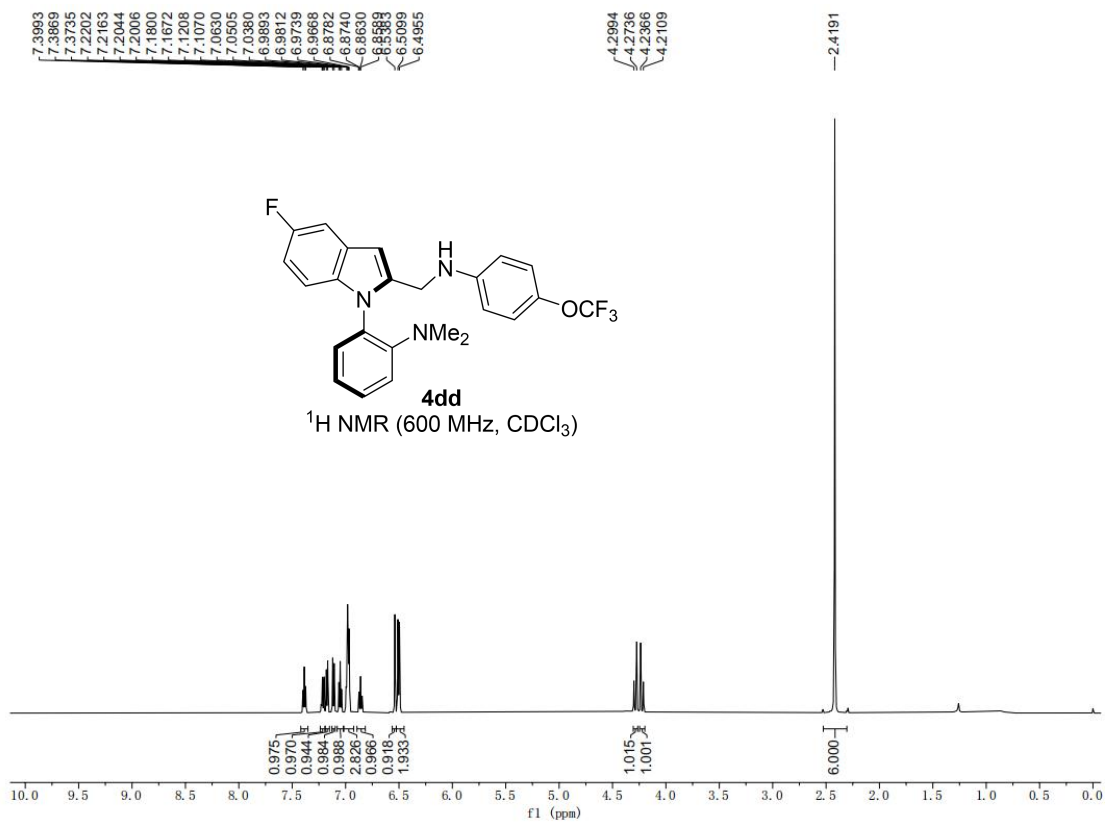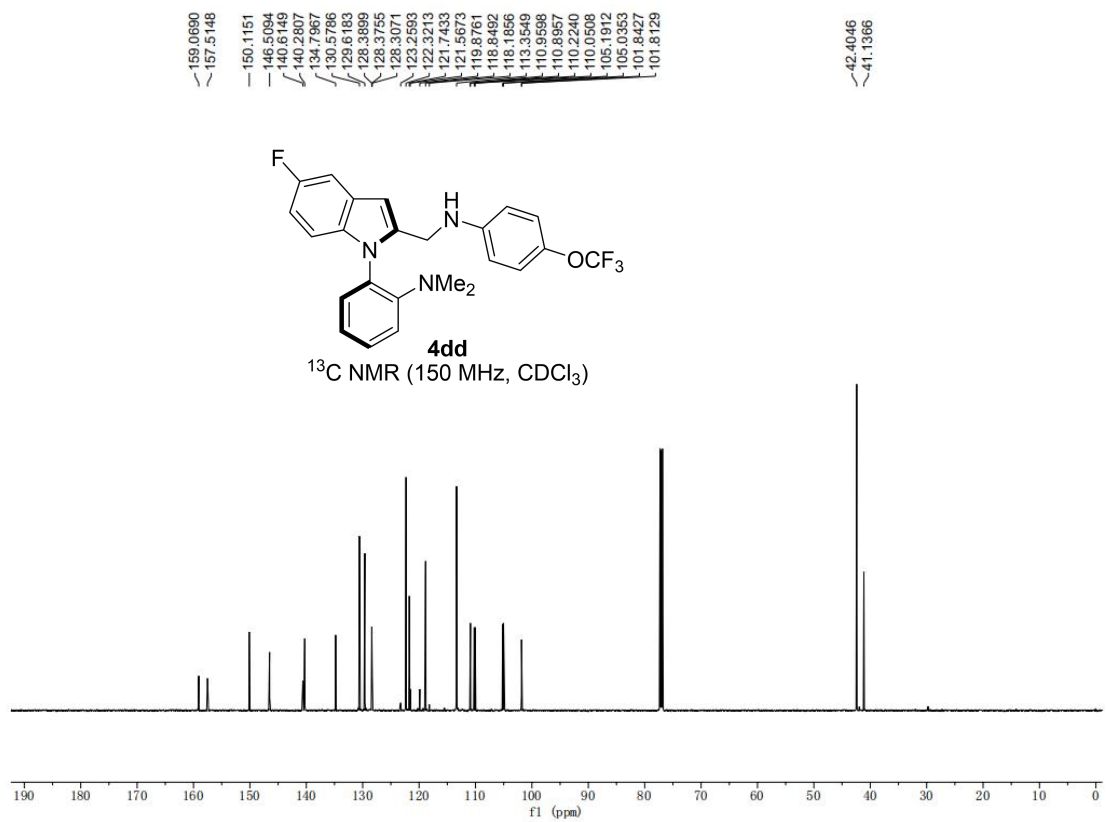

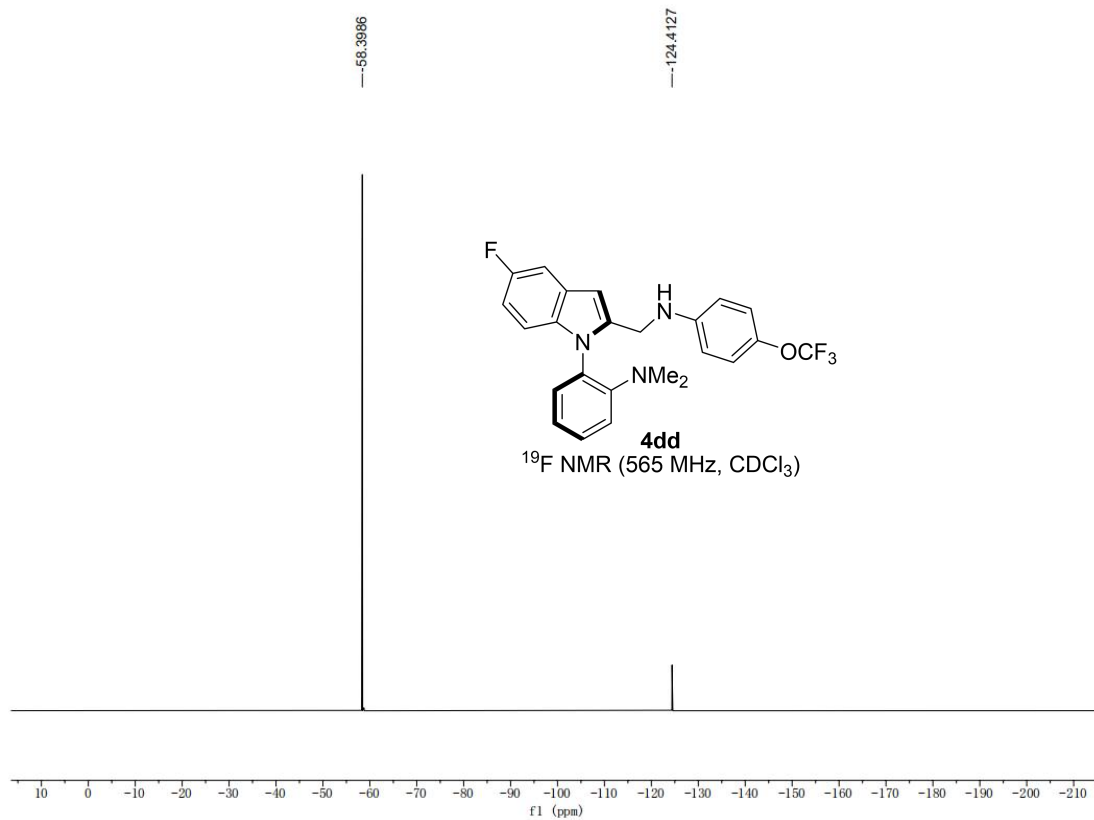

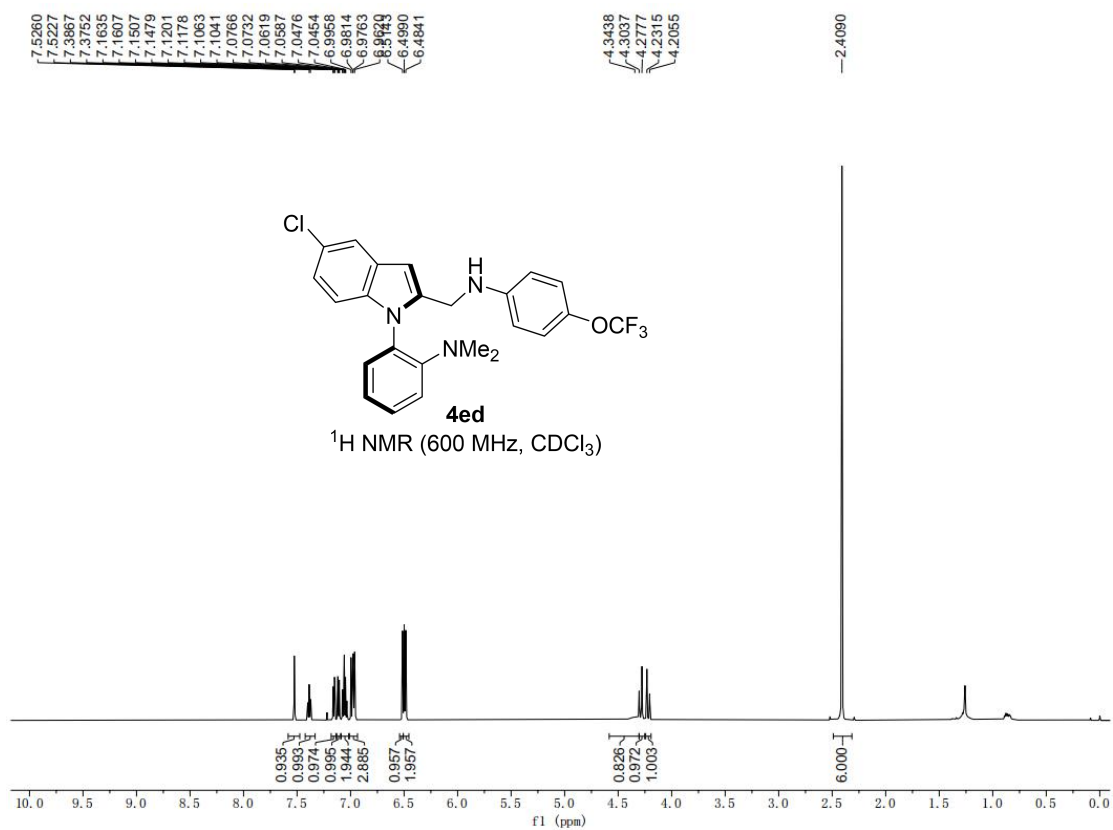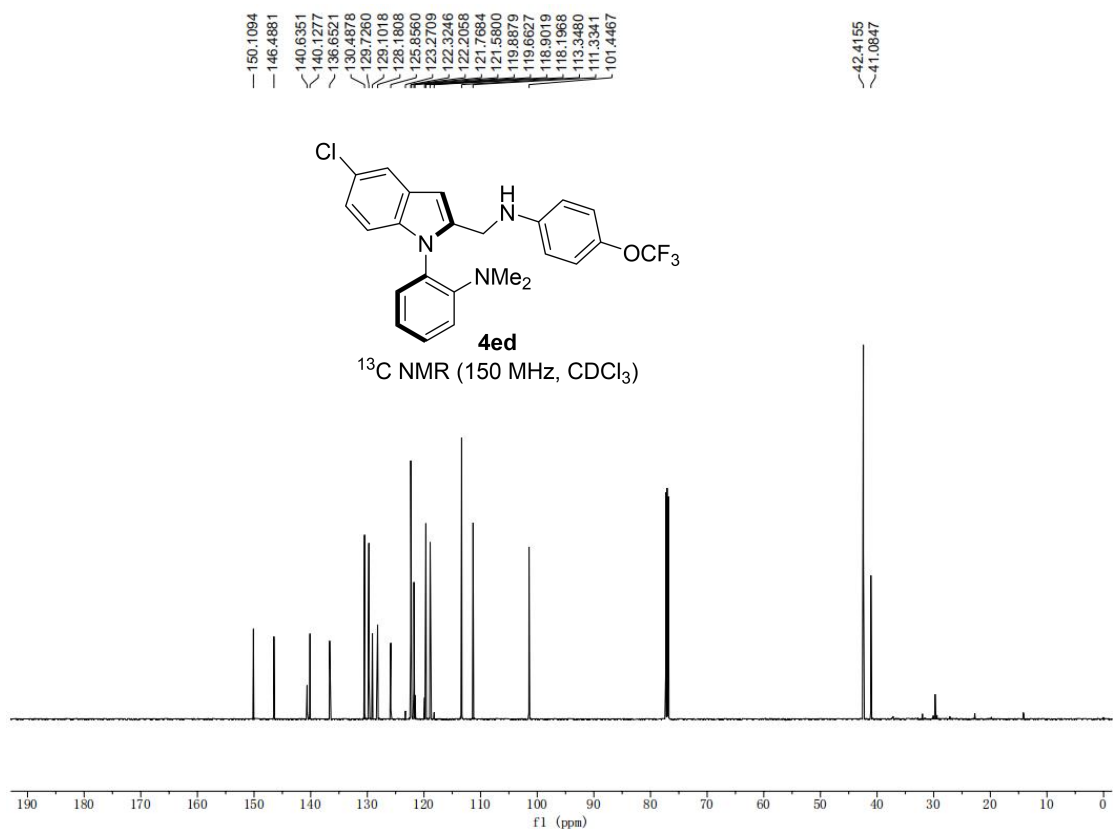

—58.3749

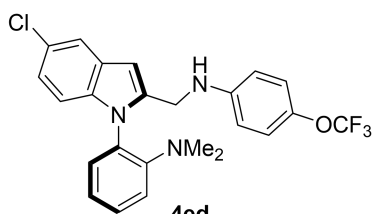

**4ed**  
<sup>19</sup>F NMR (565 MHz, CDCl<sub>3</sub>)

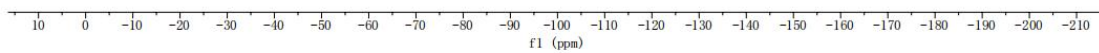

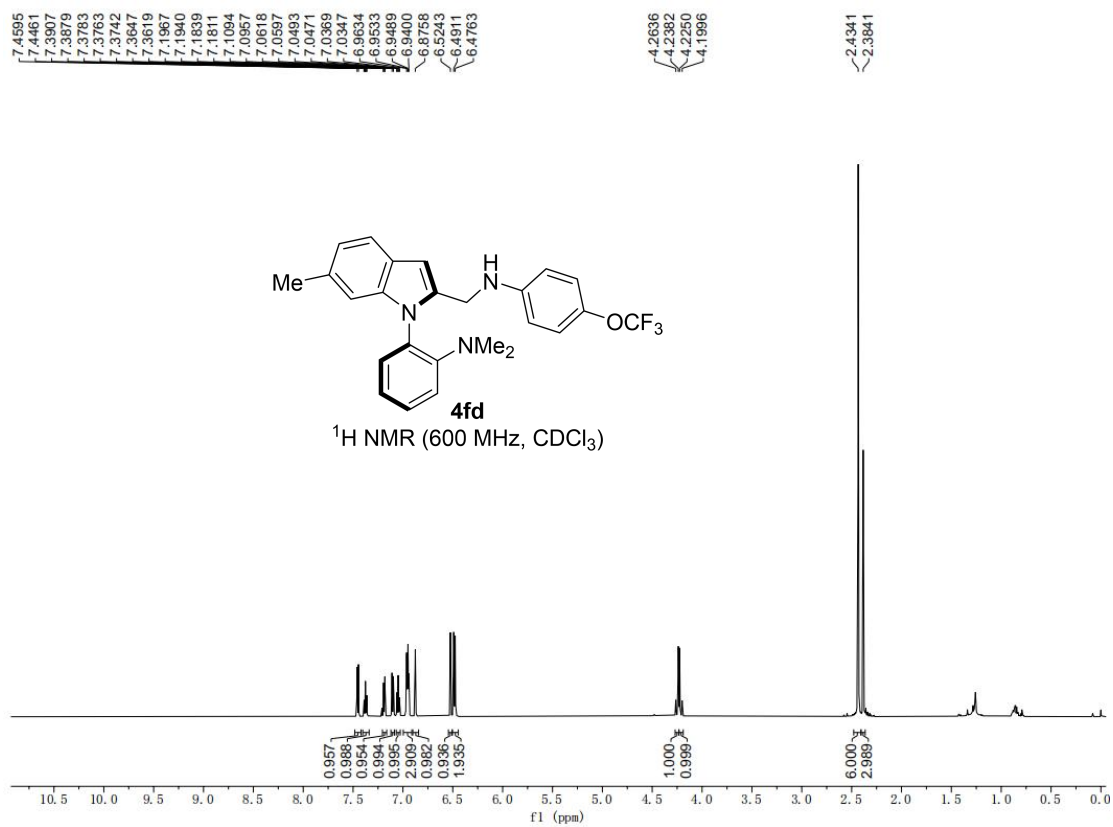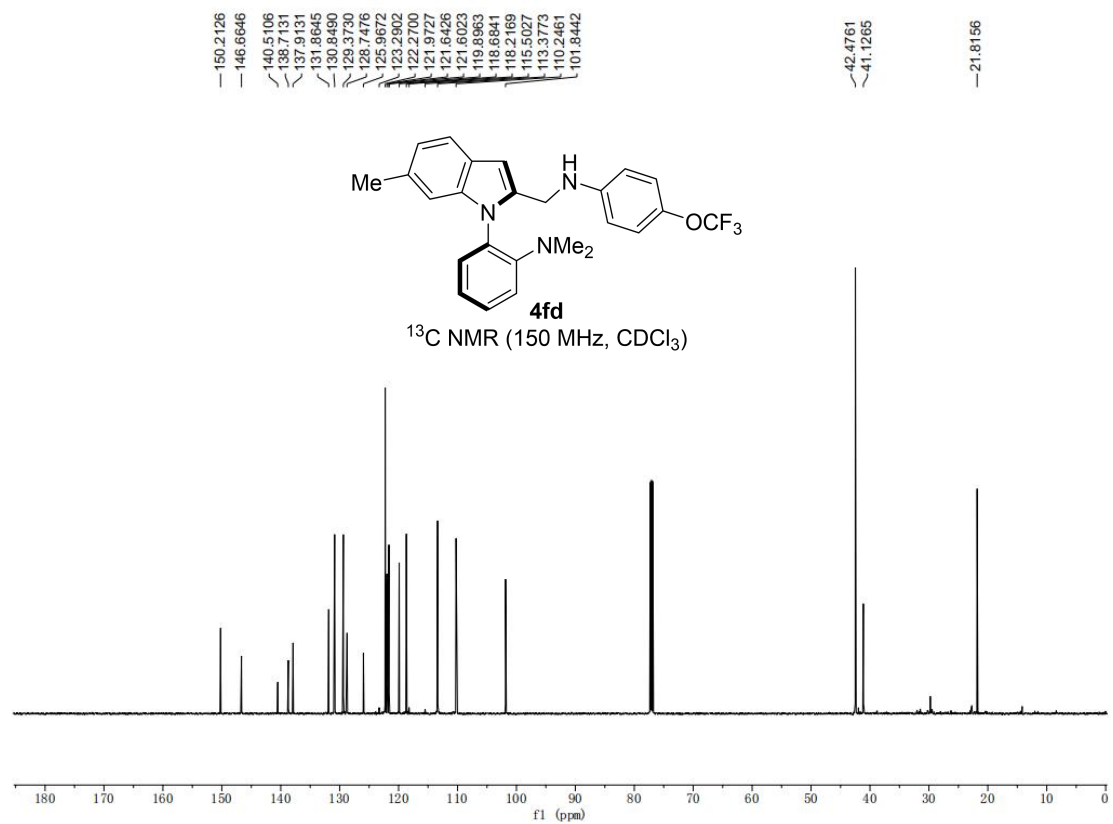



—56.3873

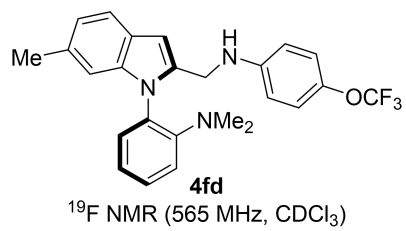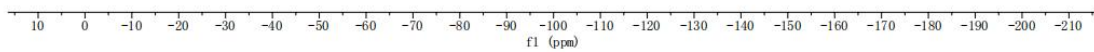

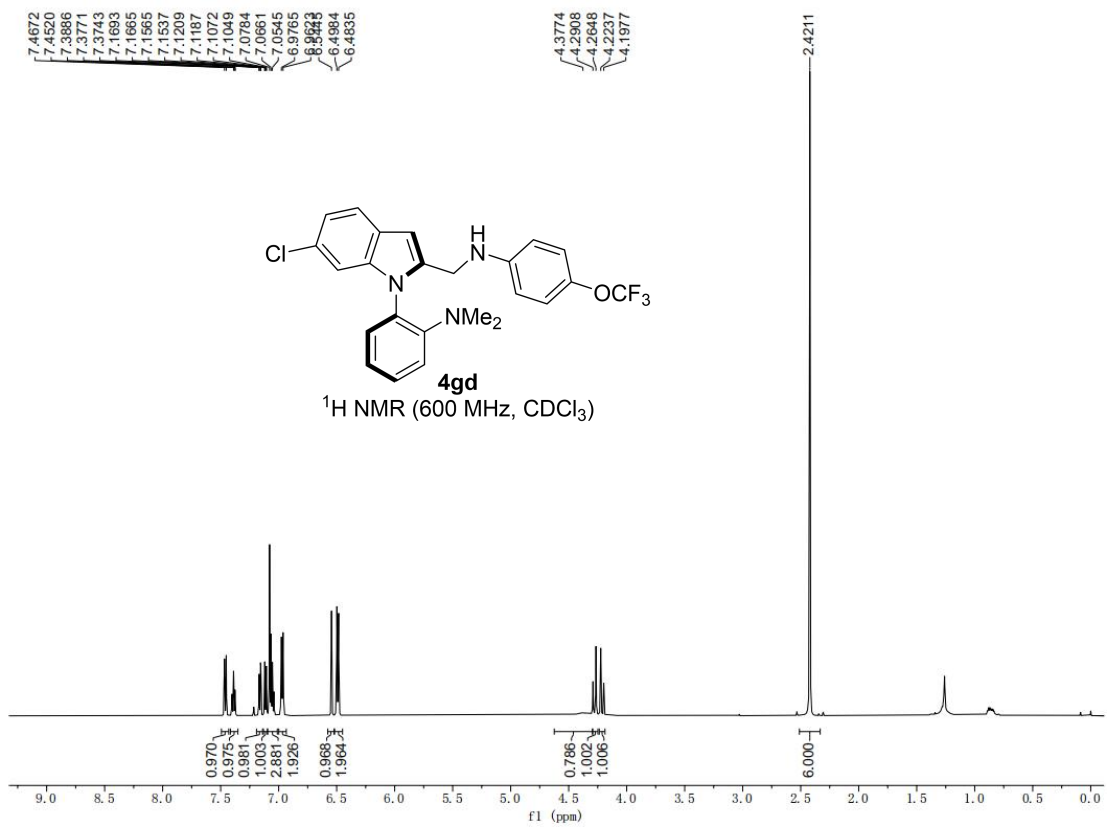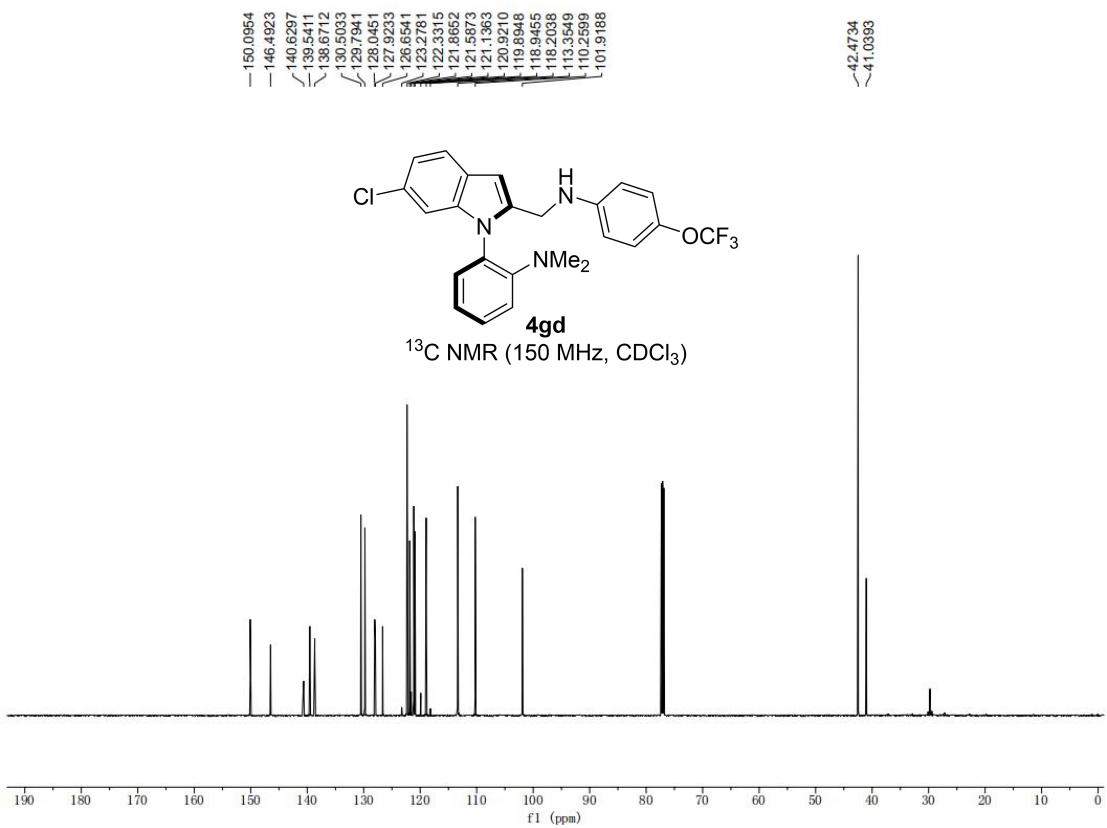

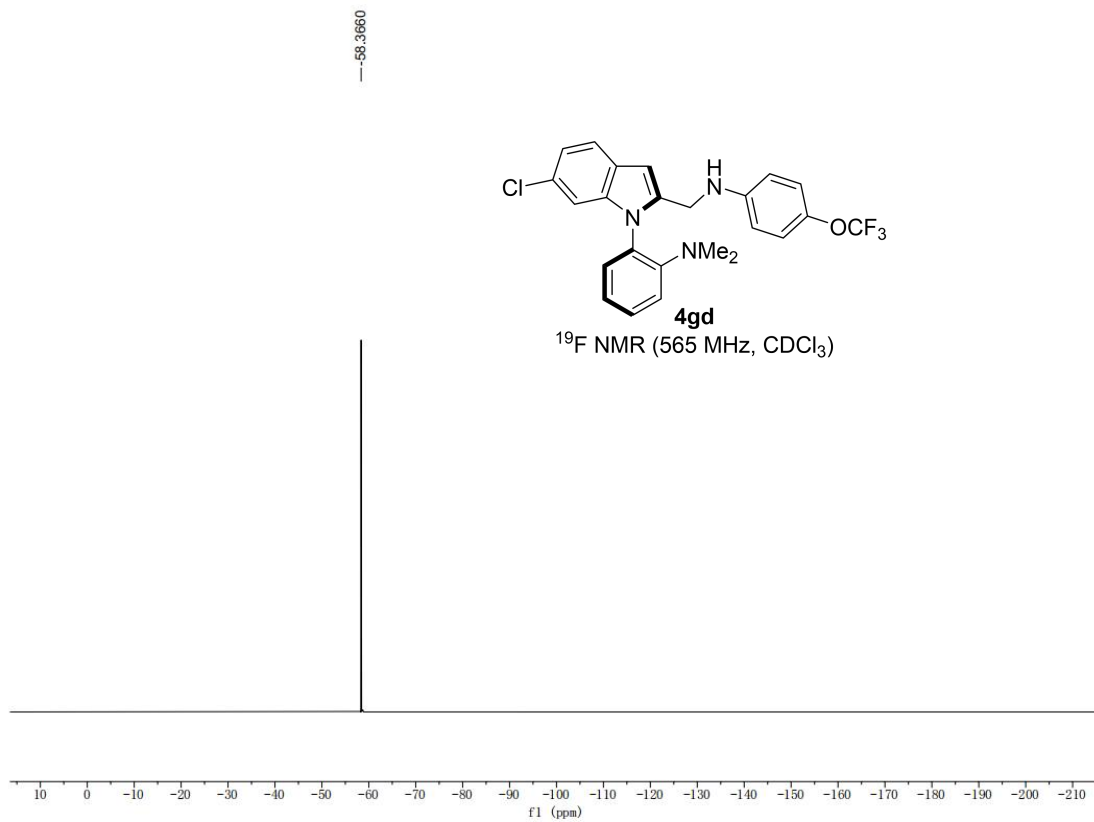

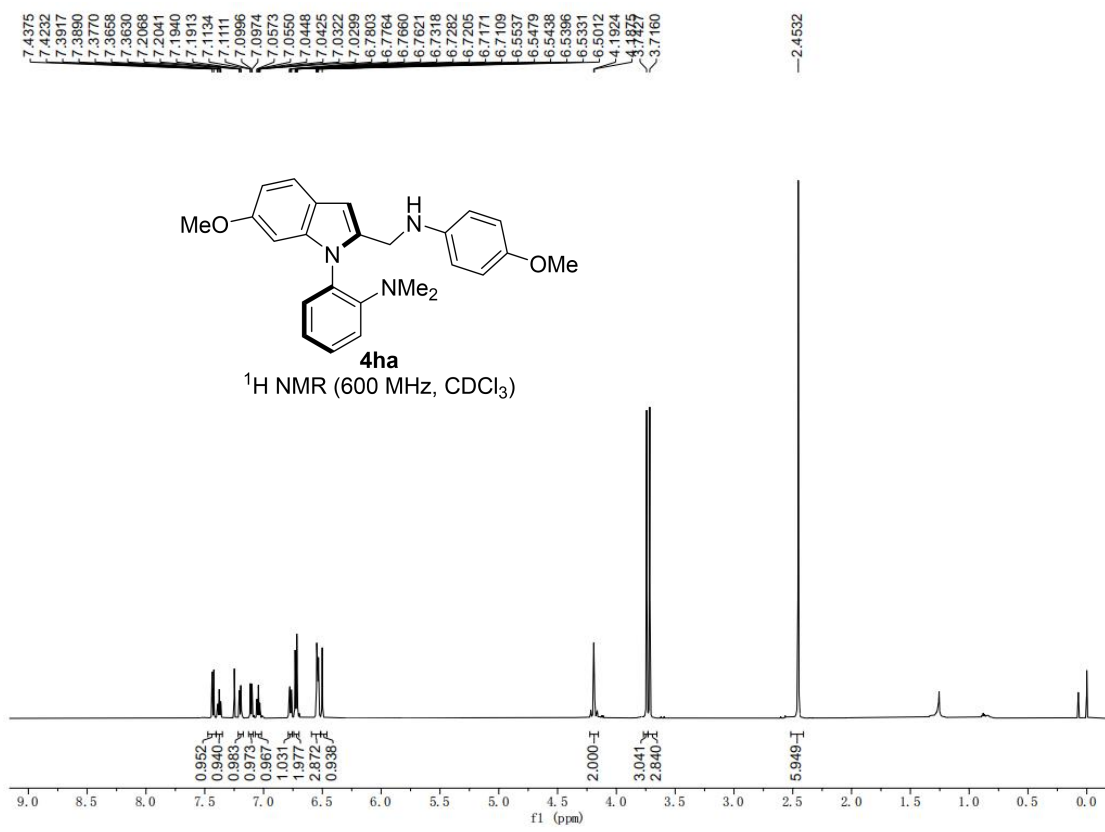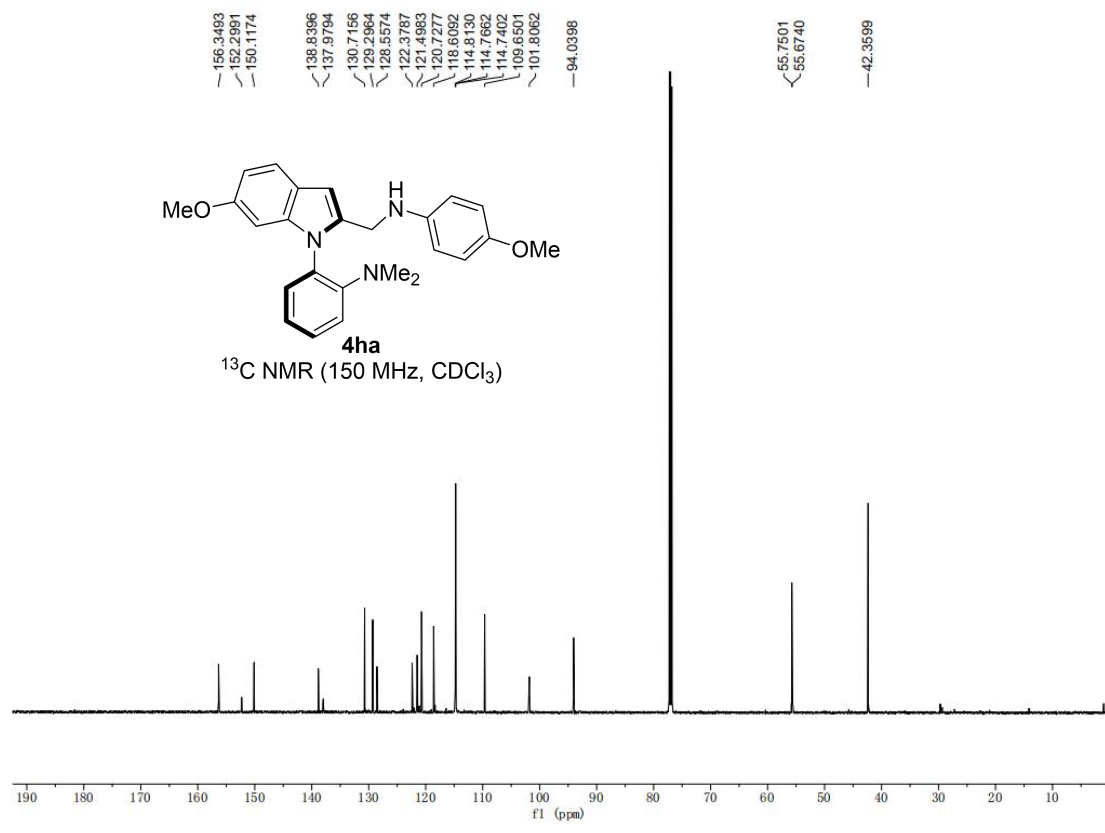

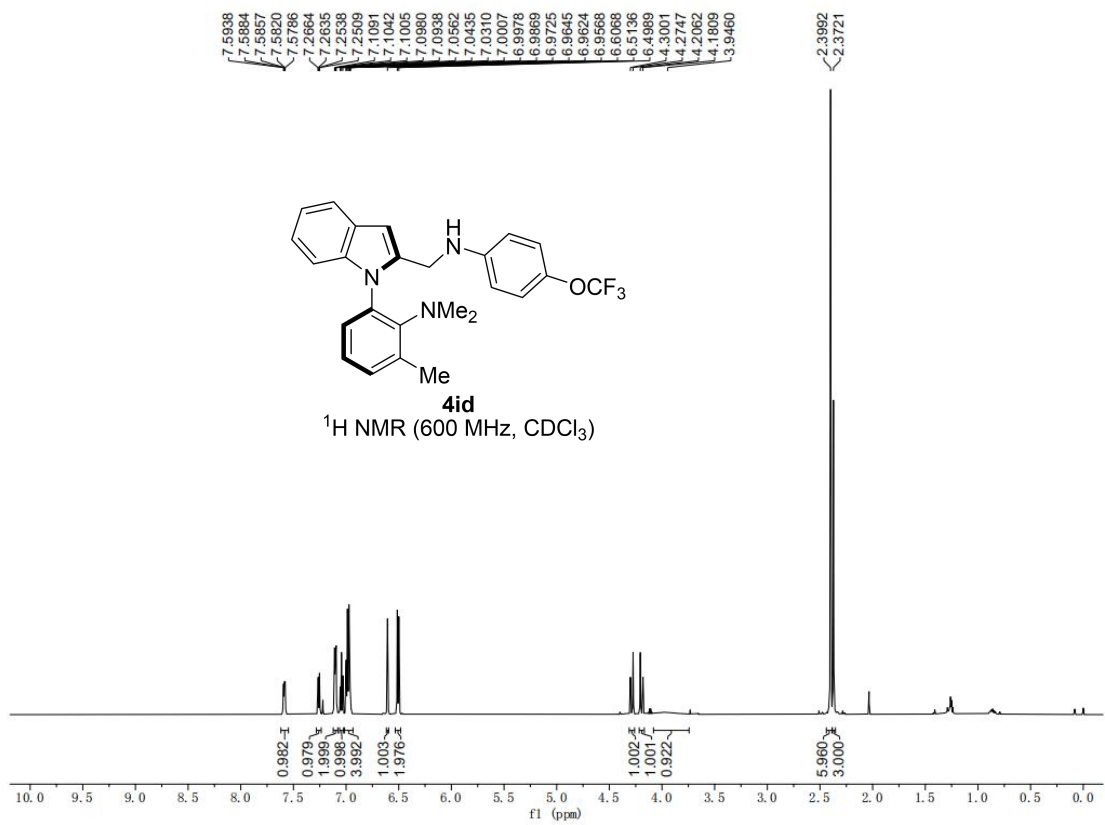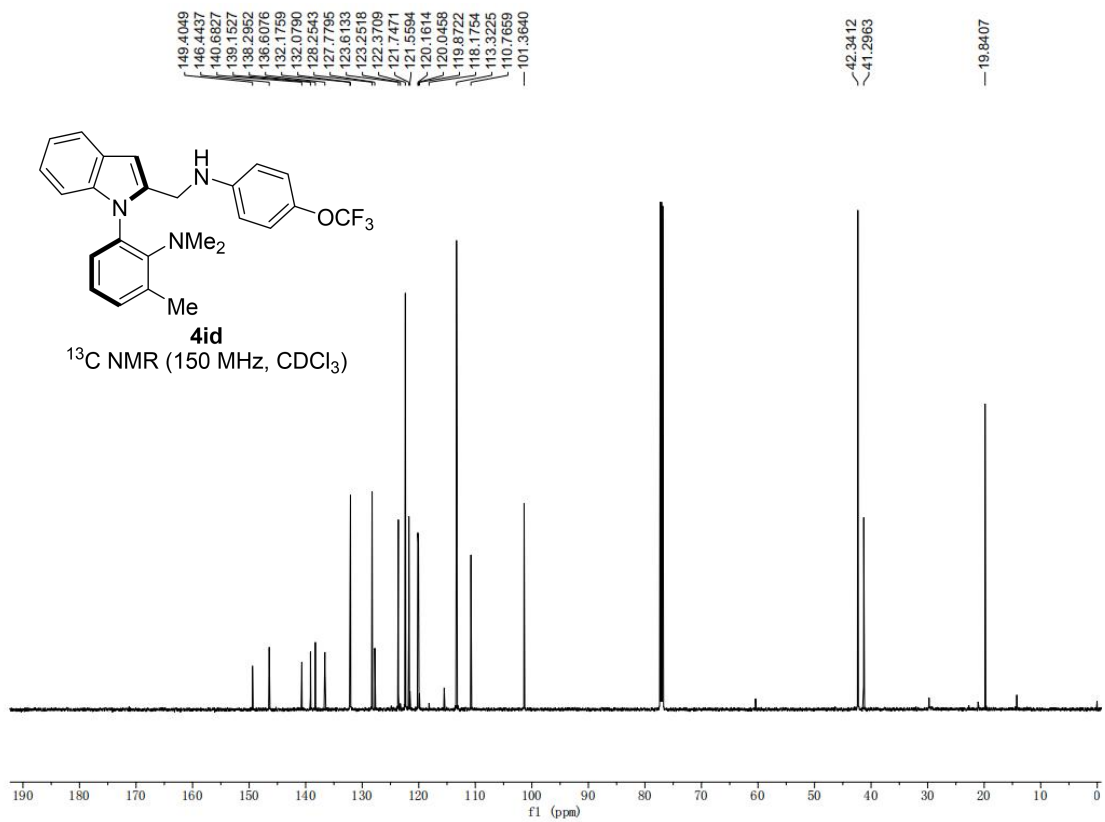

—58.4162

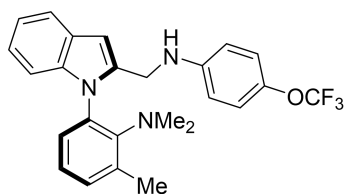

**4id**  
<sup>19</sup>F NMR (565 MHz, CDCl<sub>3</sub>)

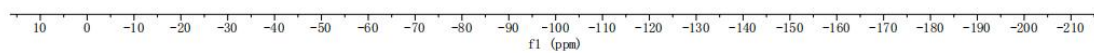

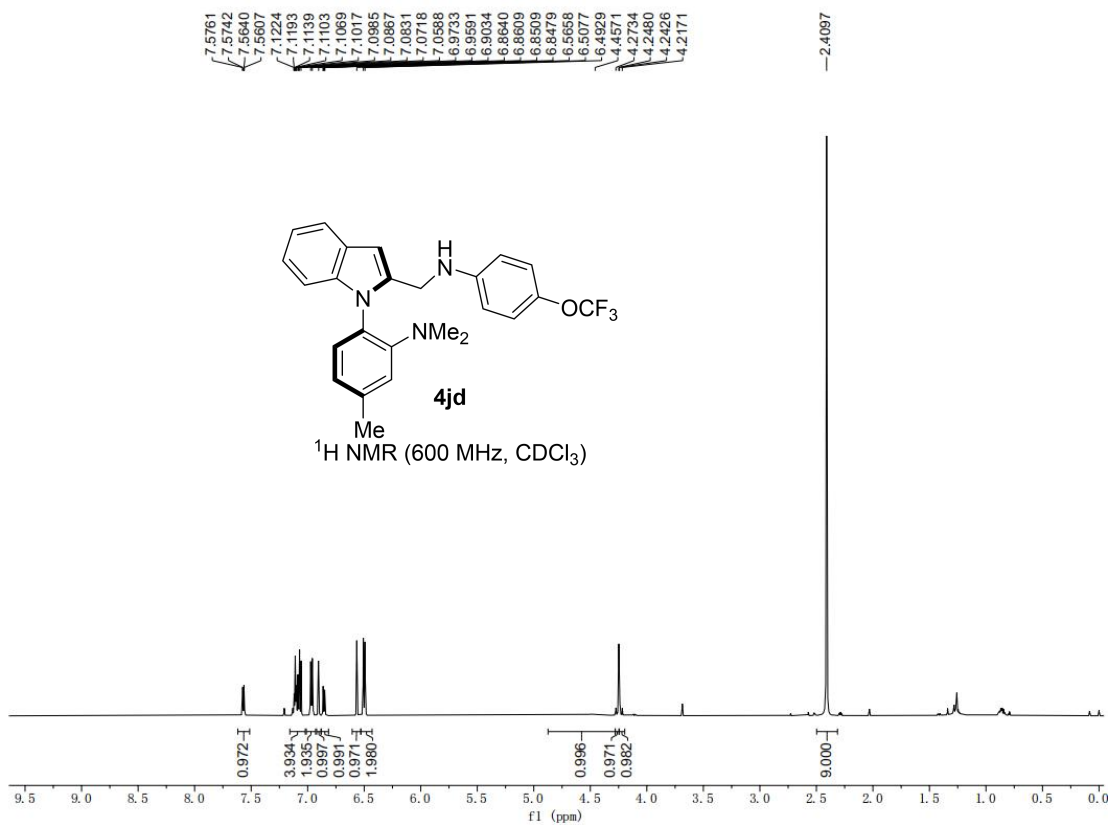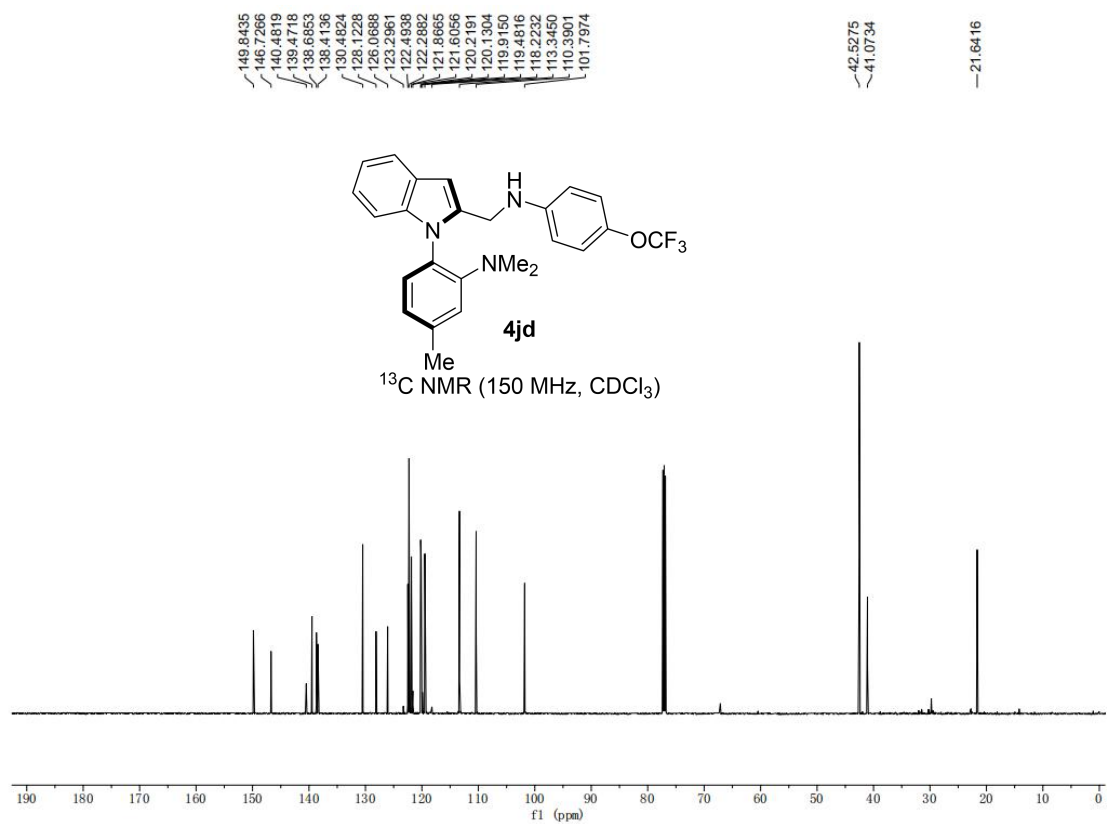

---56.3713

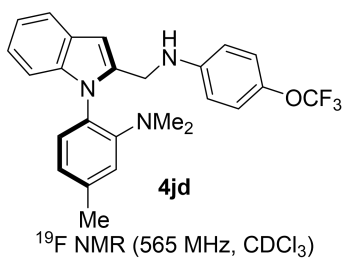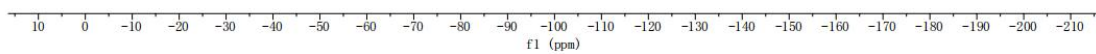



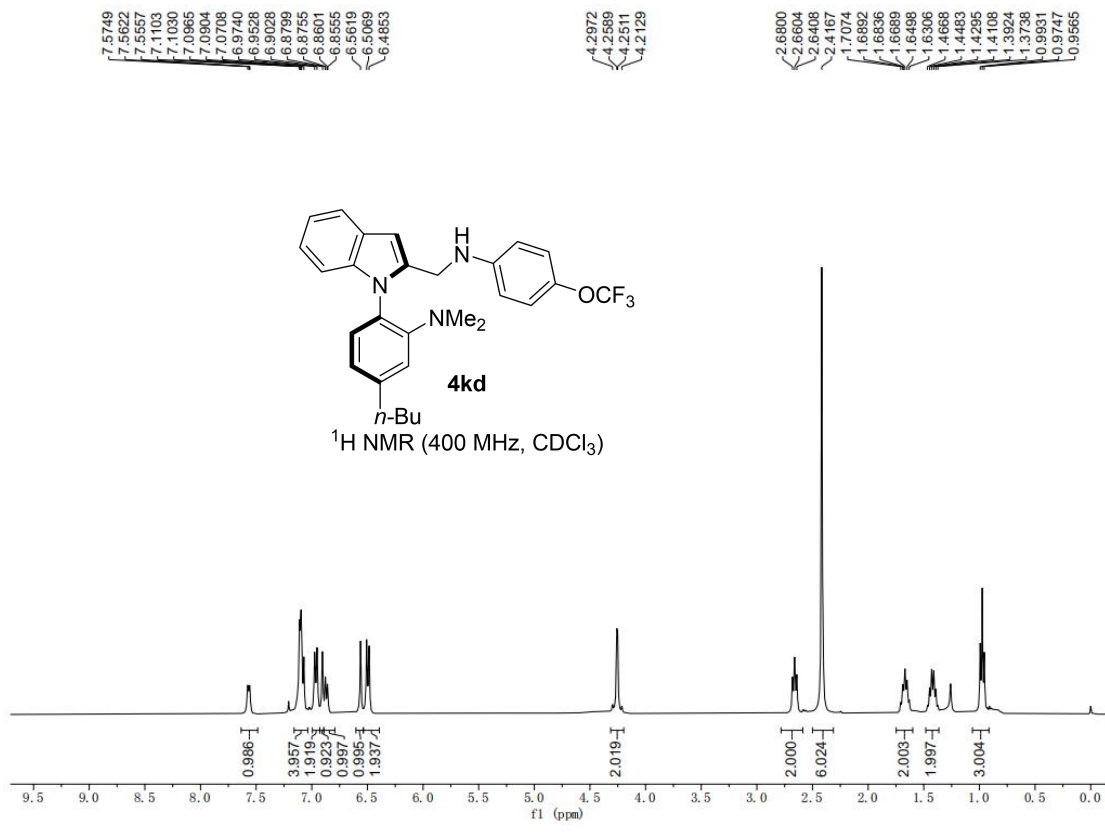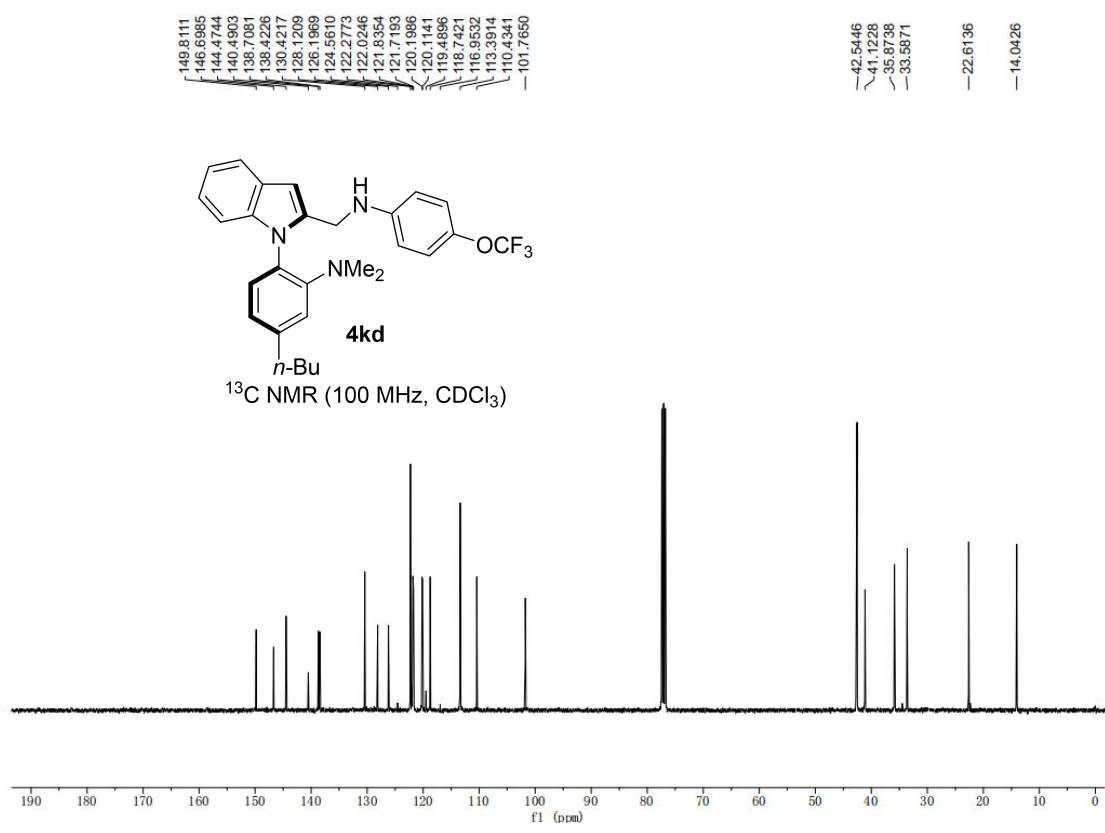

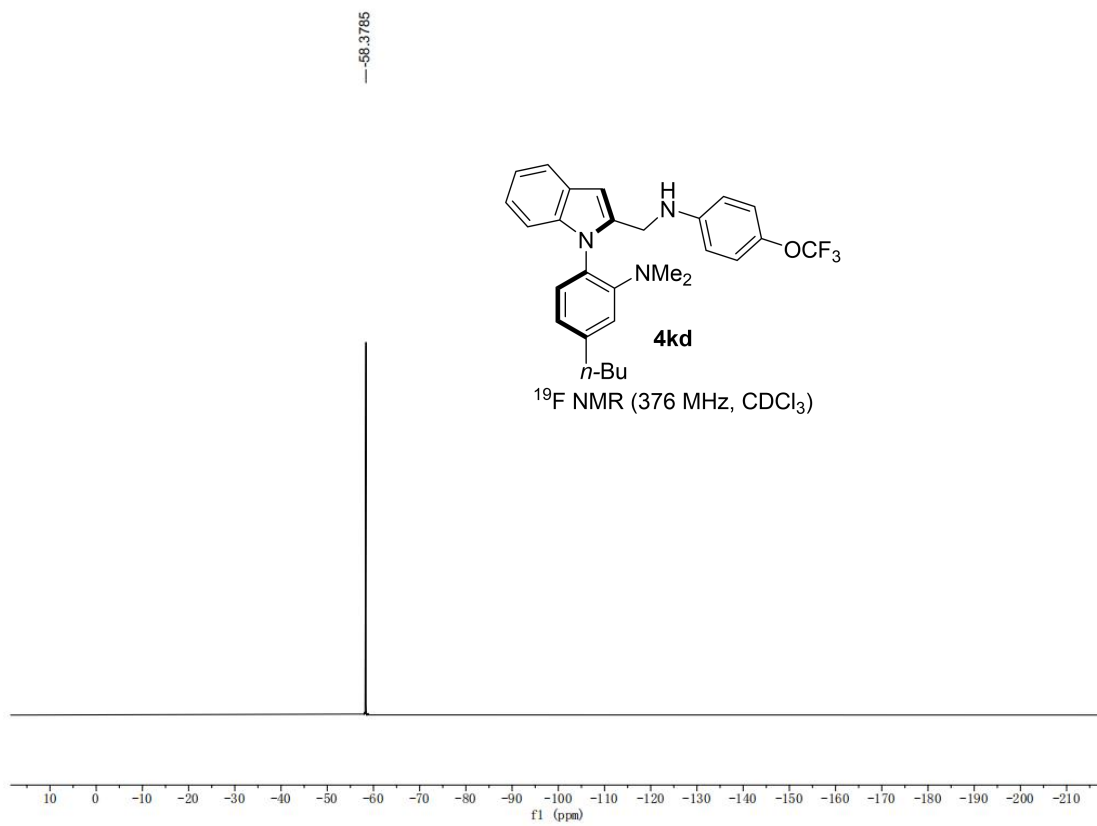

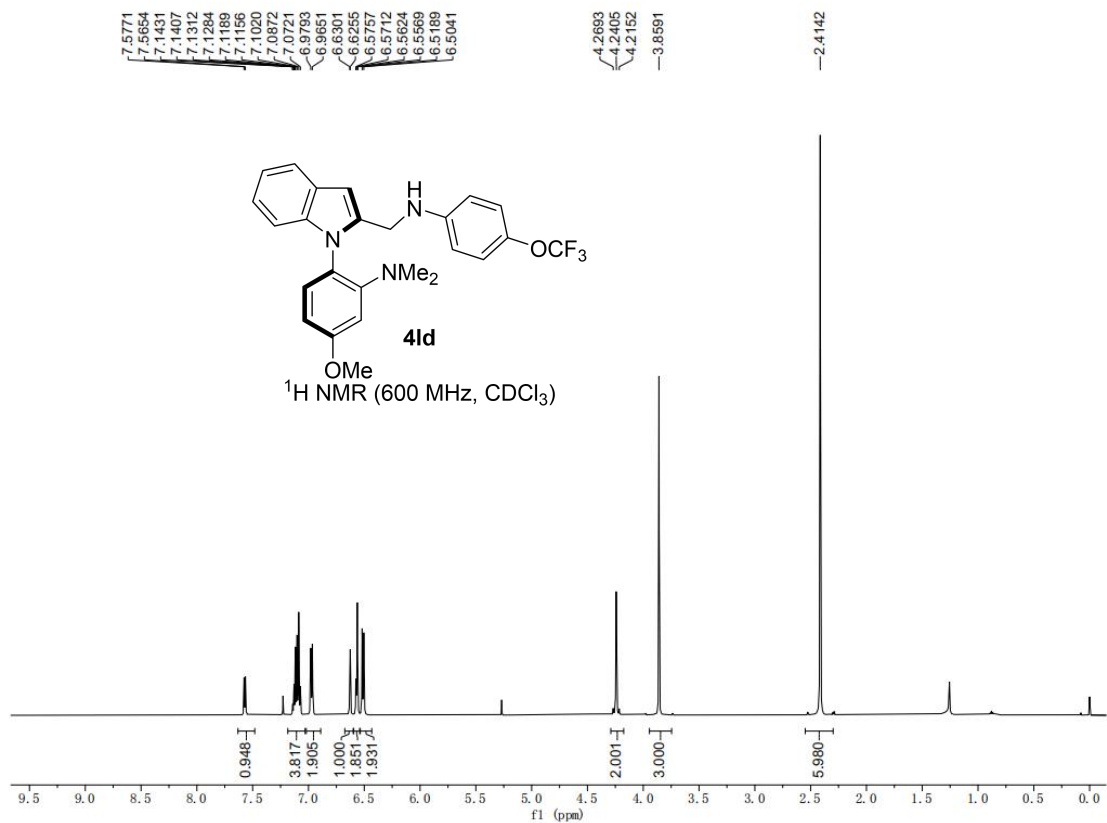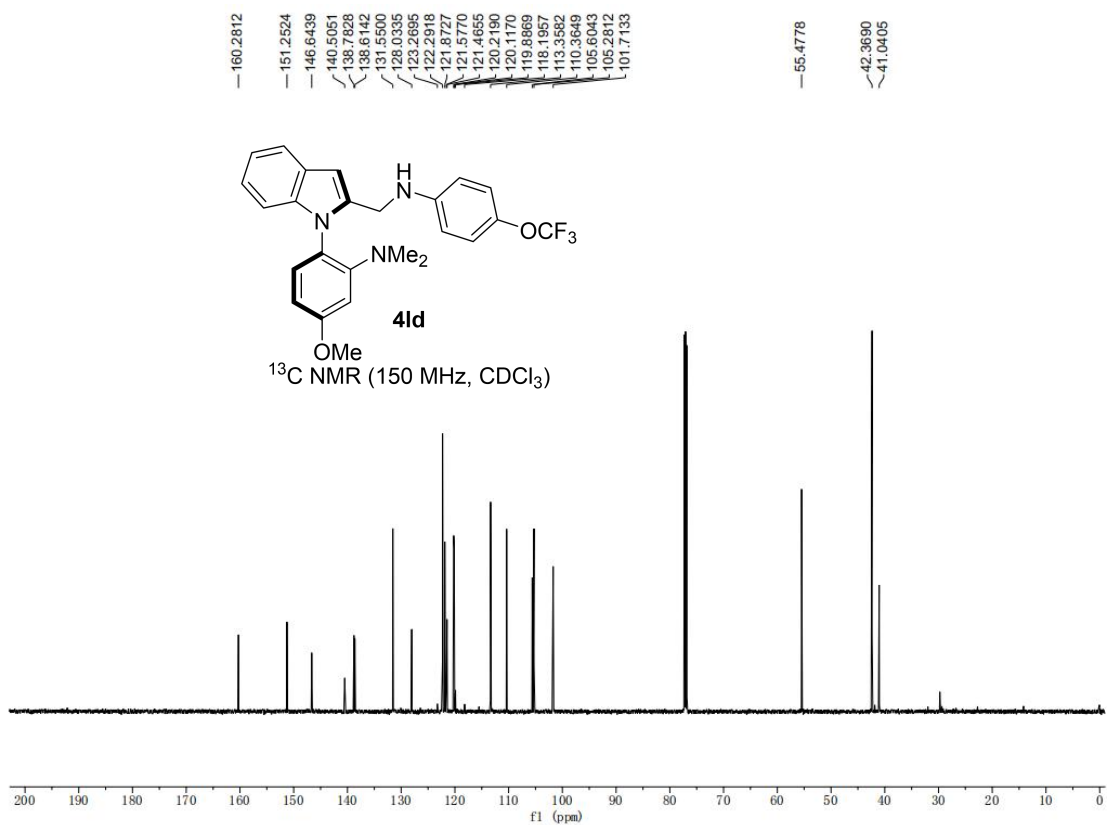

— 58.3945

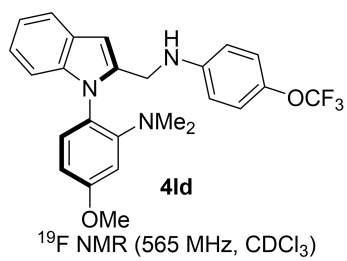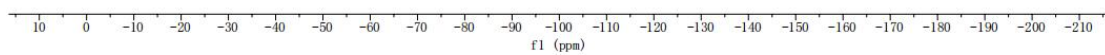

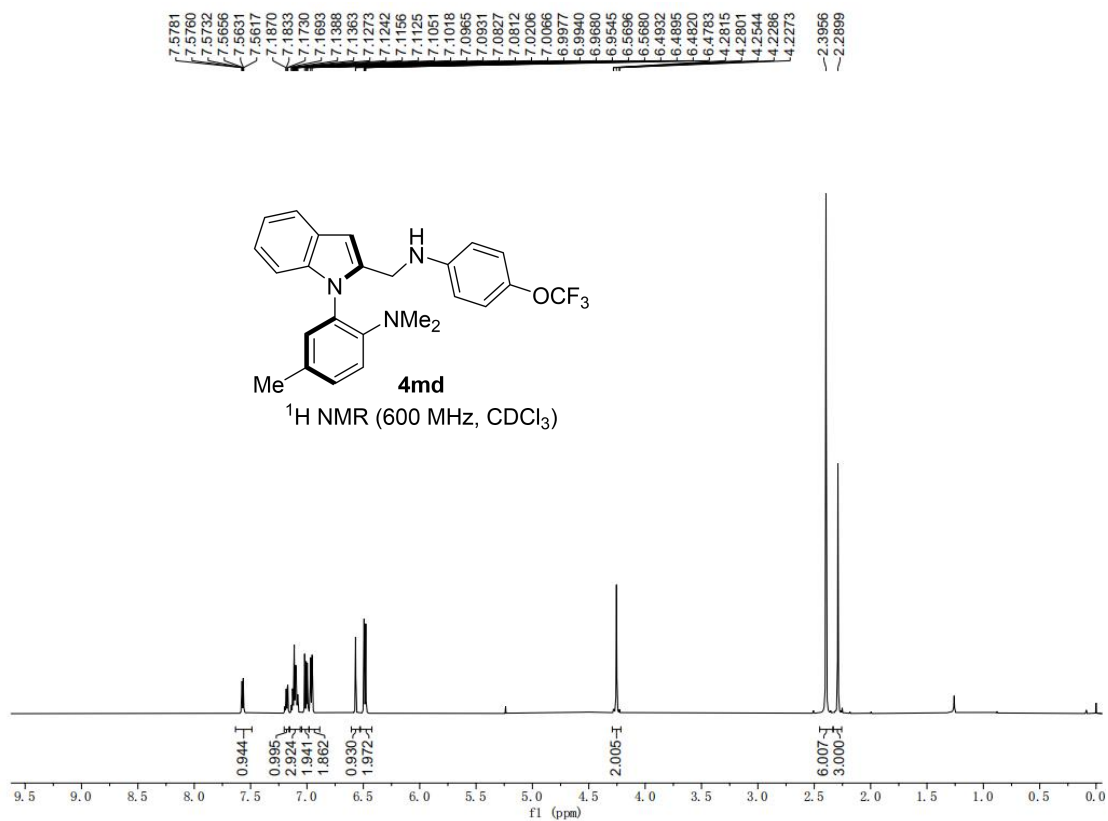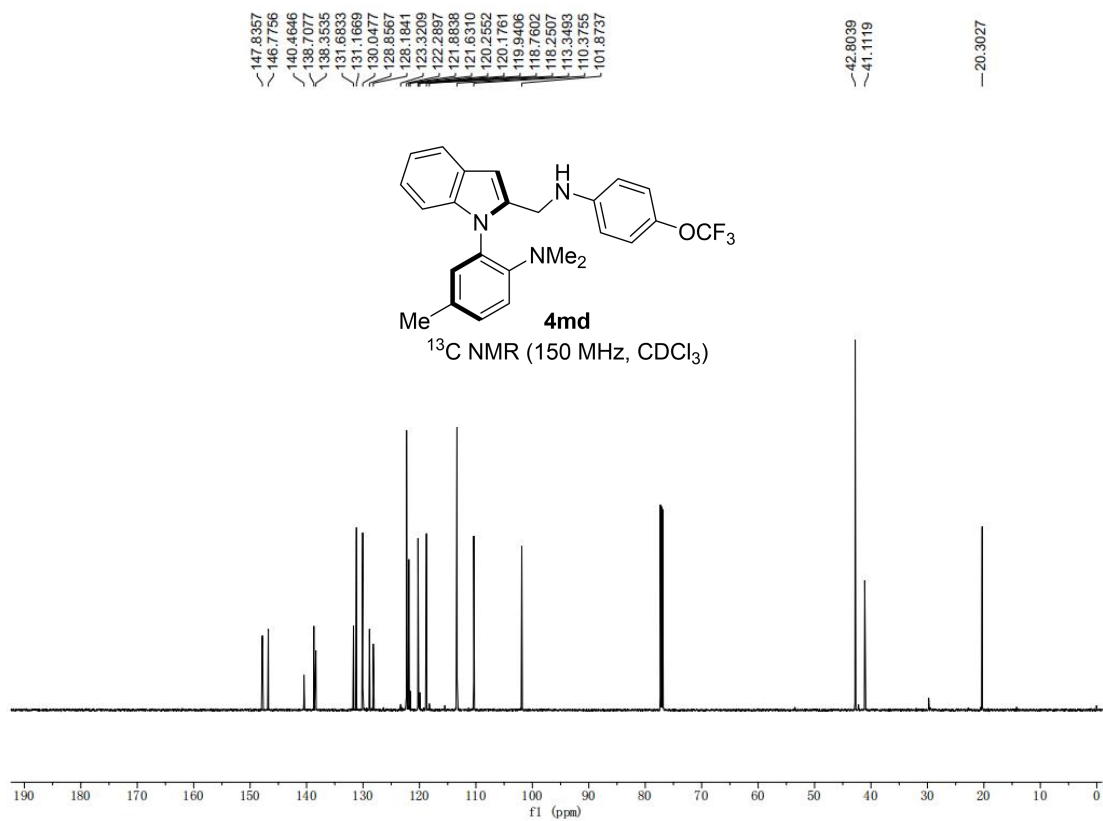

—58.3443

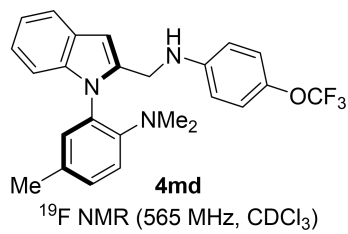

<sup>19</sup>F NMR (565 MHz, CDCl<sub>3</sub>)

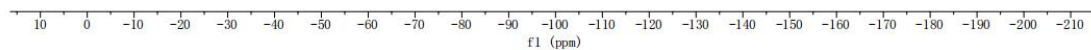

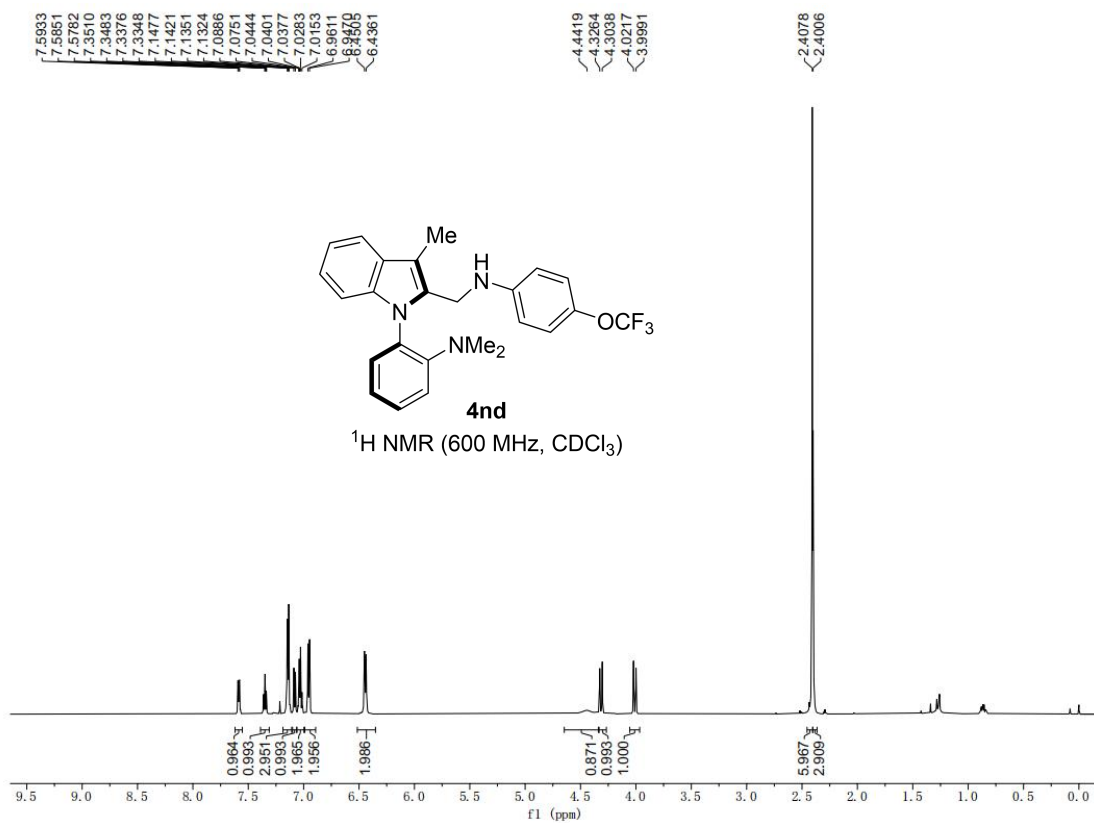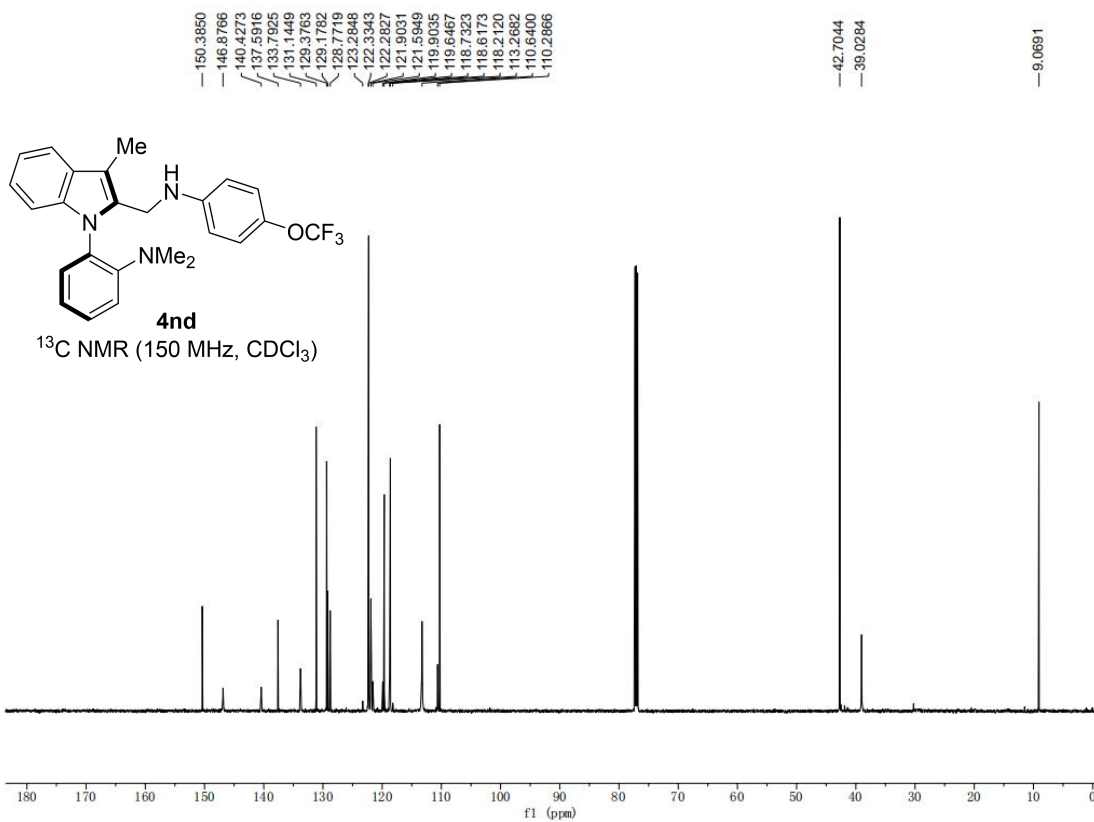

—58.4070

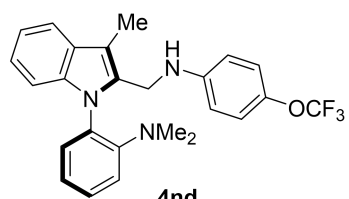

**4nd**  
<sup>19</sup>F NMR (565 MHz, CDCl<sub>3</sub>)

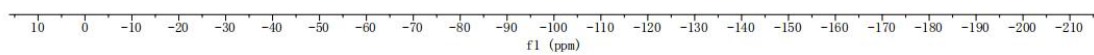



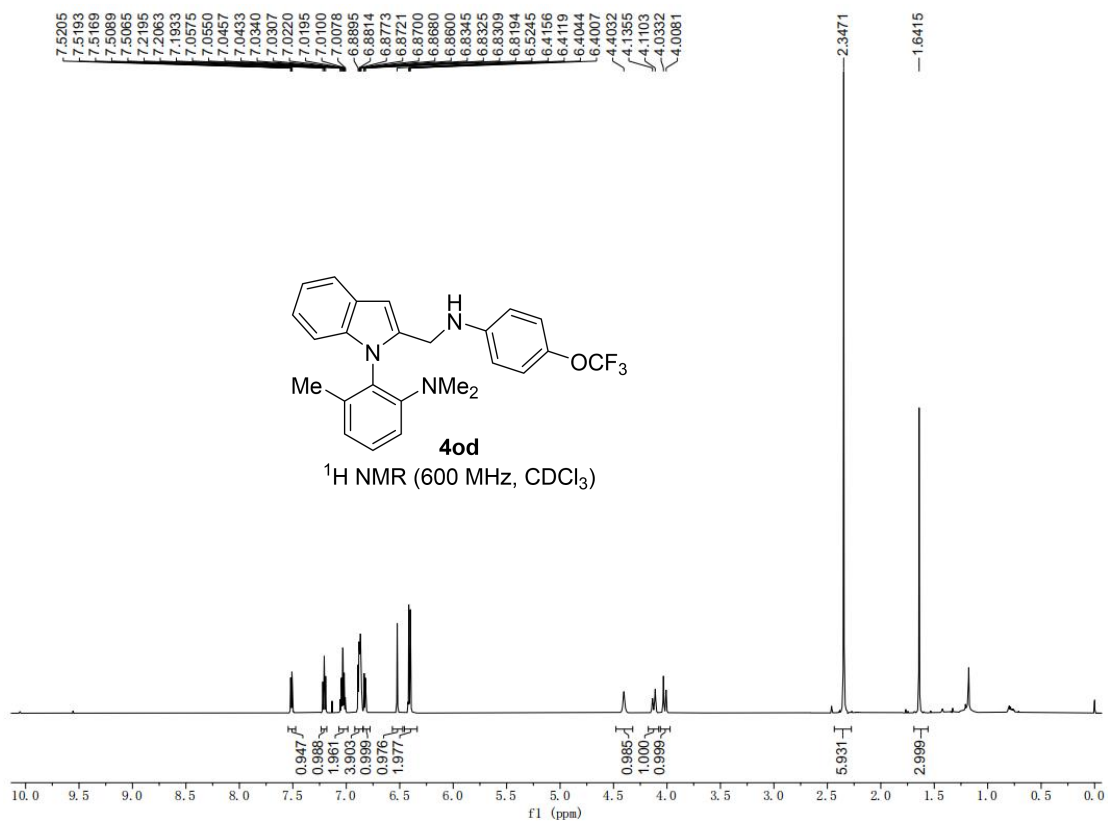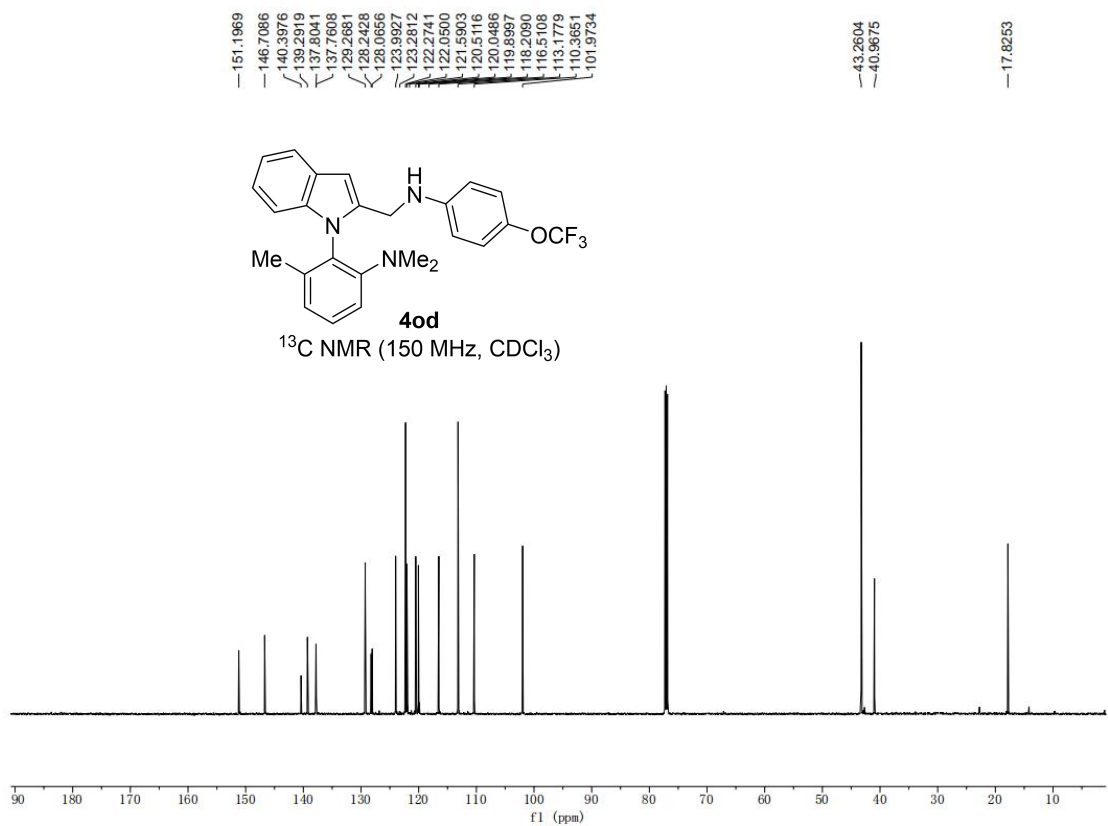

--58.3916

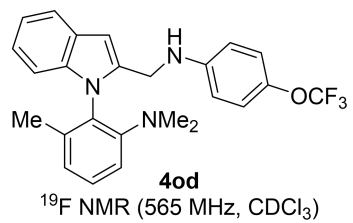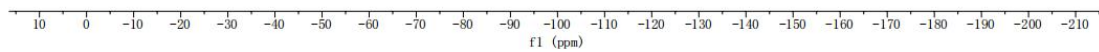

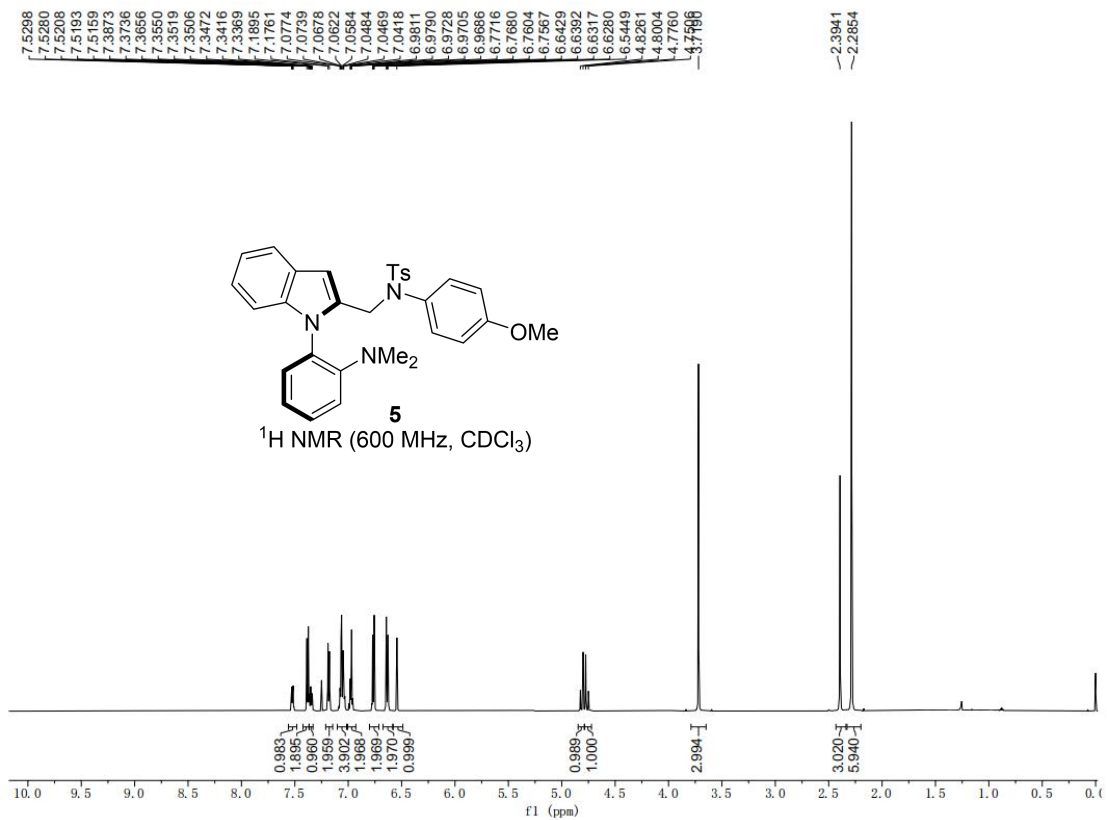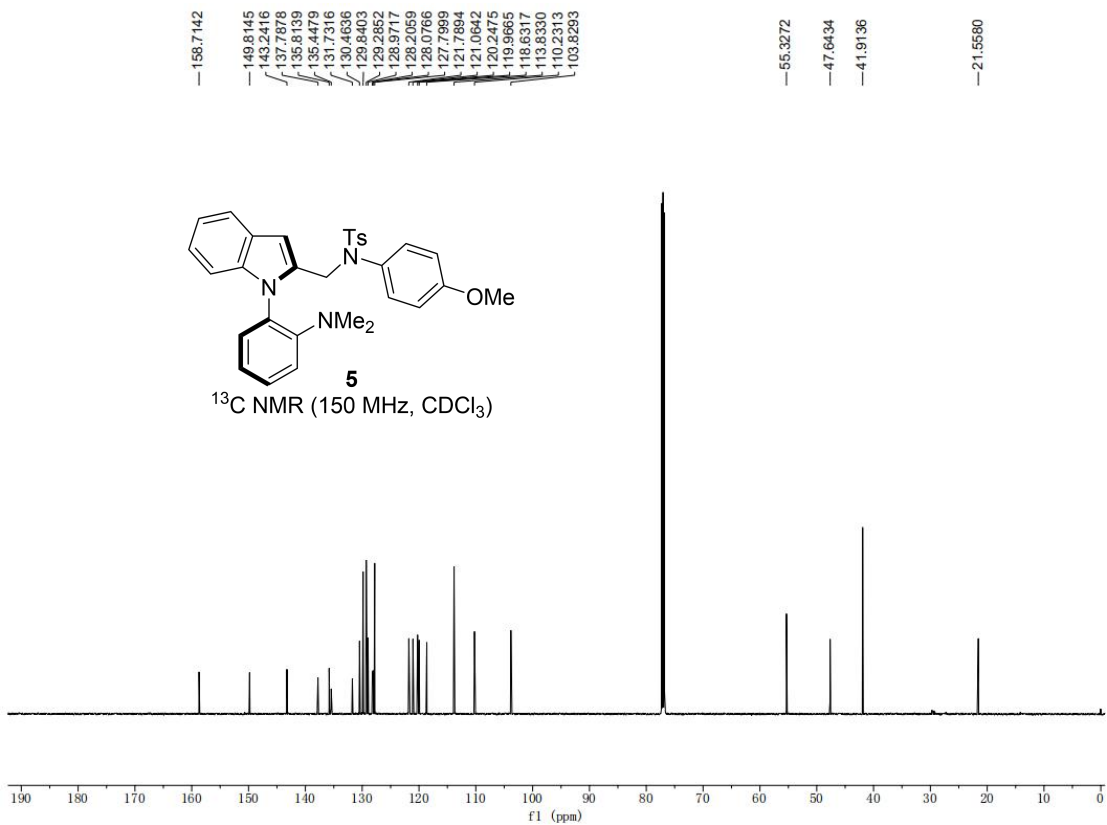

## HPLC Traces

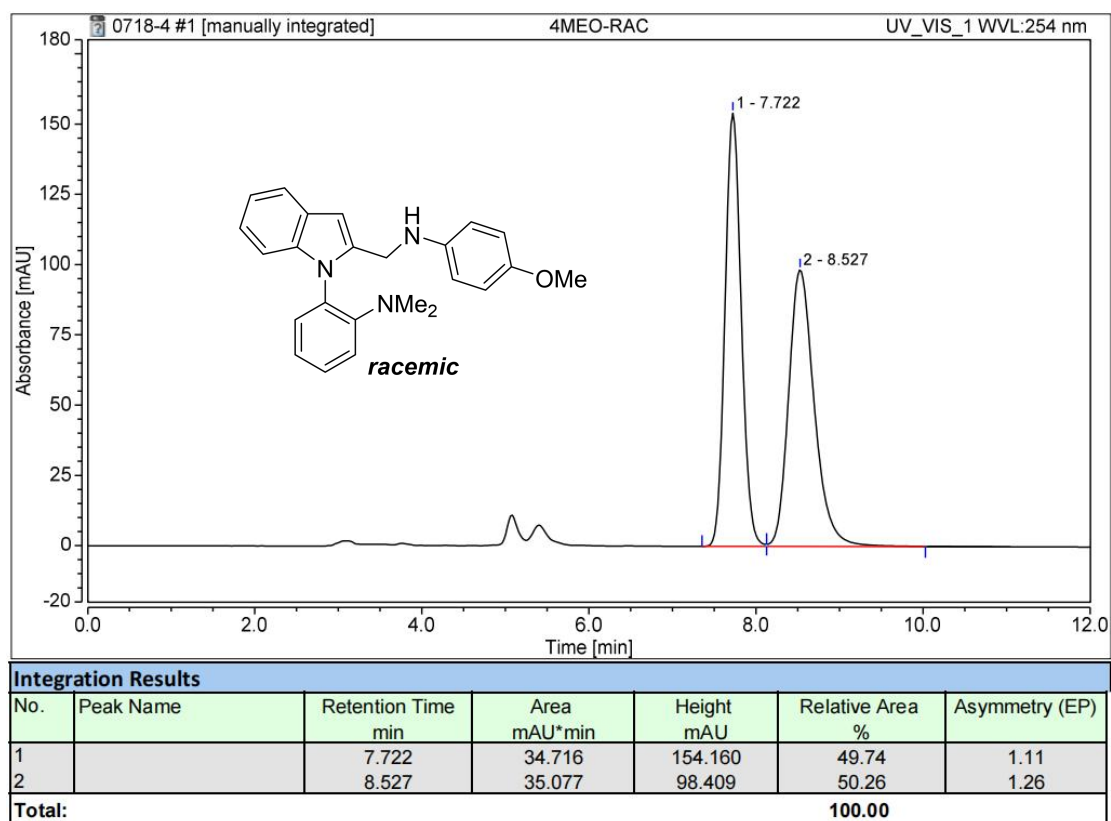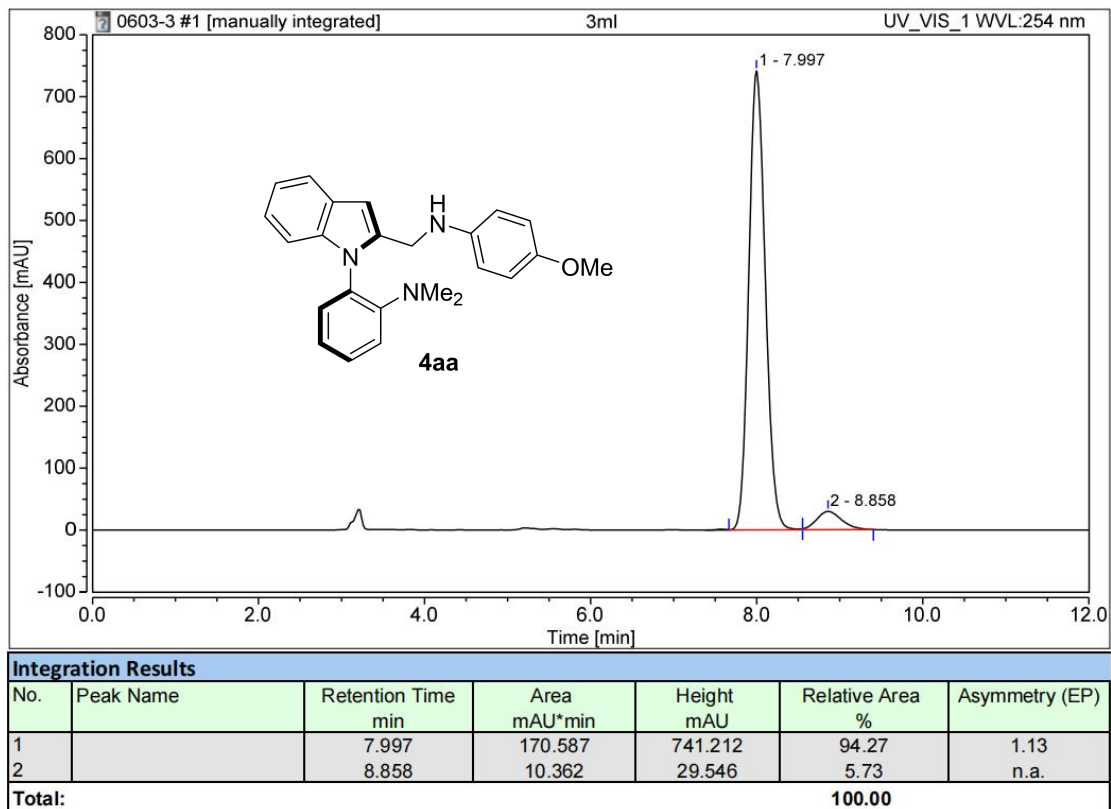

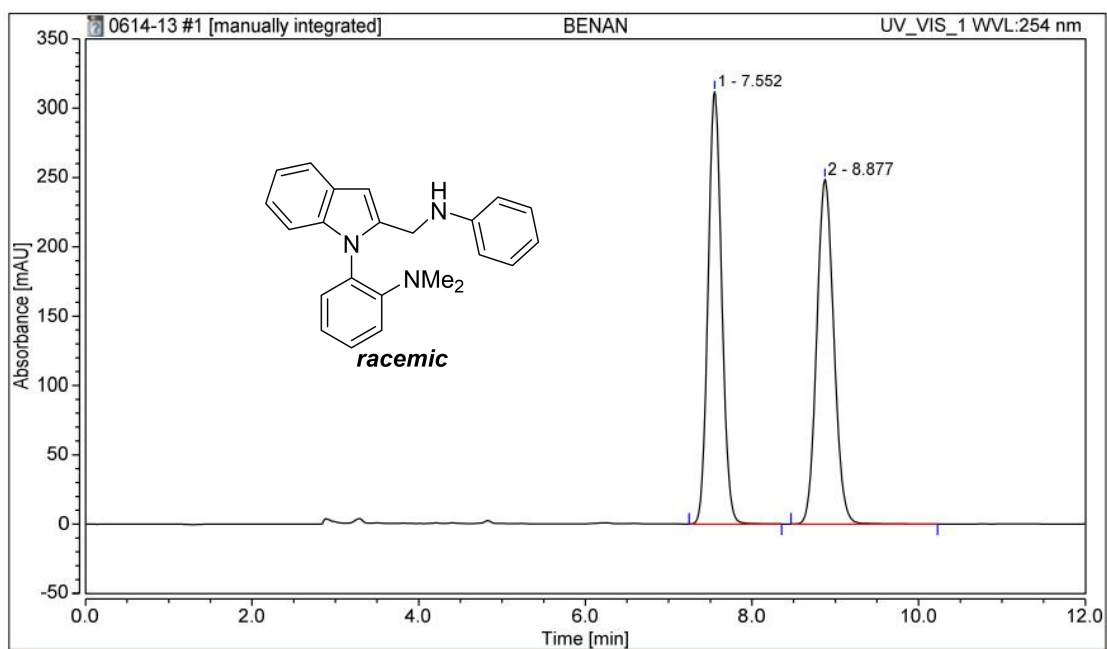

| Integration Results |           |                    |              |            |                 |                |
|---------------------|-----------|--------------------|--------------|------------|-----------------|----------------|
| No.                 | Peak Name | Retention Time min | Area mAU*min | Height mAU | Relative Area % | Asymmetry (EP) |
| 1                   |           | 7.552              | 59.121       | 311.906    | 49.98           | 1.09           |
| 2                   |           | 8.877              | 59.176       | 248.611    | 50.02           | 1.09           |
| <b>Total:</b>       |           |                    |              |            | <b>100.00</b>   |                |

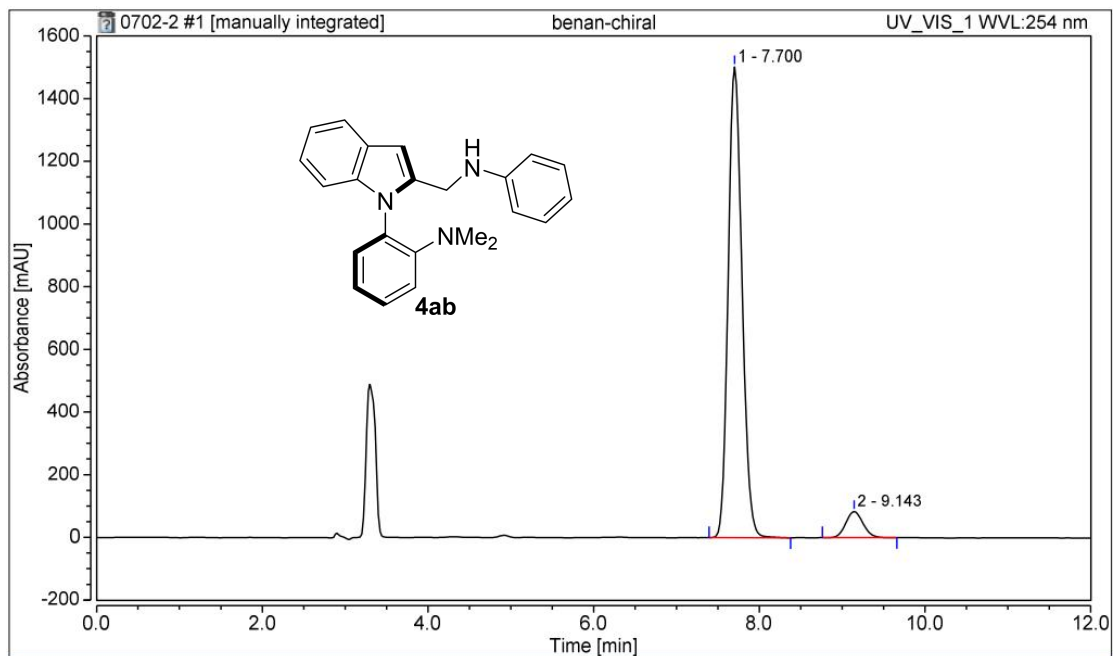

| Integration Results |           |                    |              |            |                 |                |
|---------------------|-----------|--------------------|--------------|------------|-----------------|----------------|
| No.                 | Peak Name | Retention Time min | Area mAU*min | Height mAU | Relative Area % | Asymmetry (EP) |
| 1                   |           | 7.700              | 289.953      | 1502.643   | 93.50           | 1.16           |
| 2                   |           | 9.143              | 20.158       | 83.221     | 6.50            | 1.09           |
| <b>Total:</b>       |           |                    |              |            | <b>100.00</b>   |                |

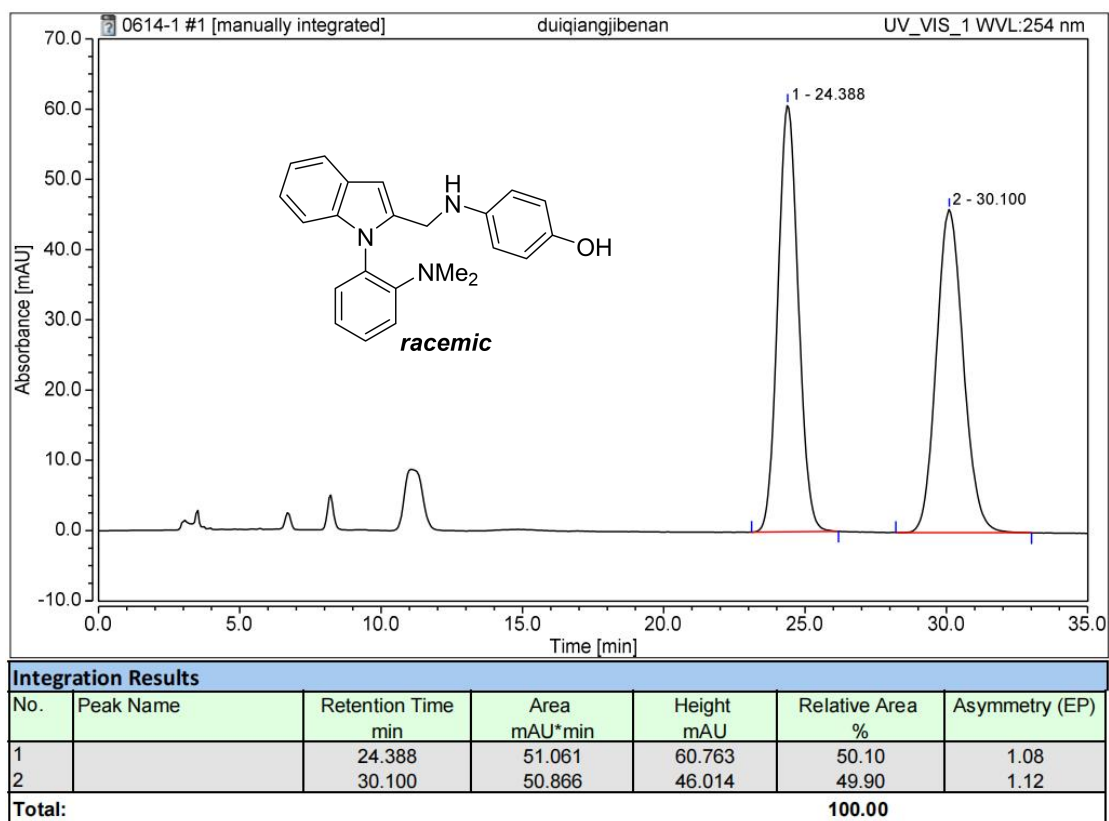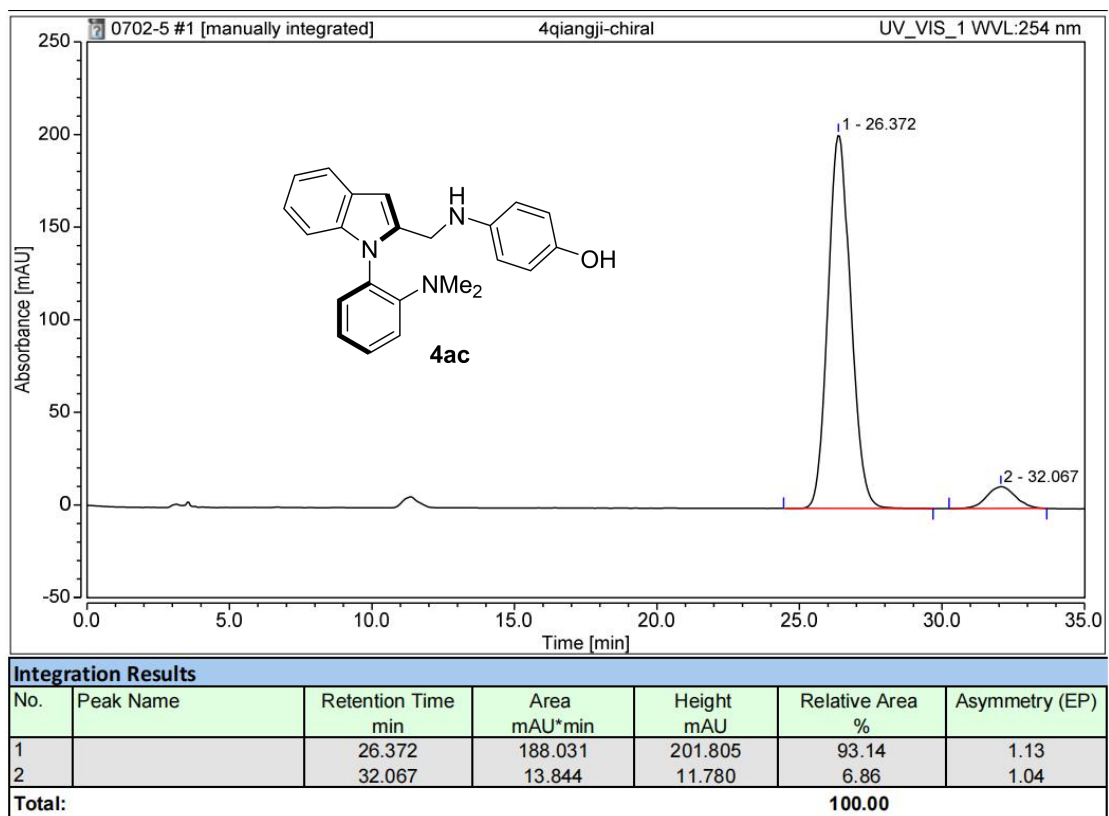

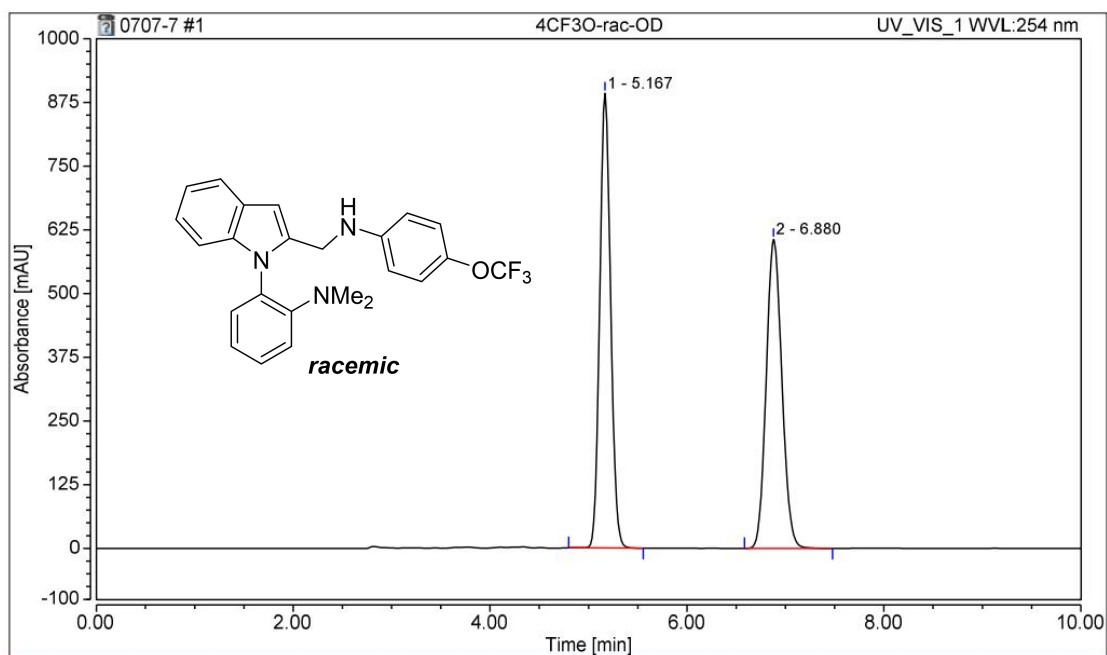

| Integration Results |           |                    |              |            |                 |                |
|---------------------|-----------|--------------------|--------------|------------|-----------------|----------------|
| No.                 | Peak Name | Retention Time min | Area mAU*min | Height mAU | Relative Area % | Asymmetry (EP) |
| 1                   |           | 5.167              | 114.448      | 892.278    | 50.56           | 1.09           |
| 2                   |           | 6.880              | 111.905      | 606.358    | 49.44           | 1.11           |
| <b>Total:</b>       |           |                    |              |            | <b>100.00</b>   |                |

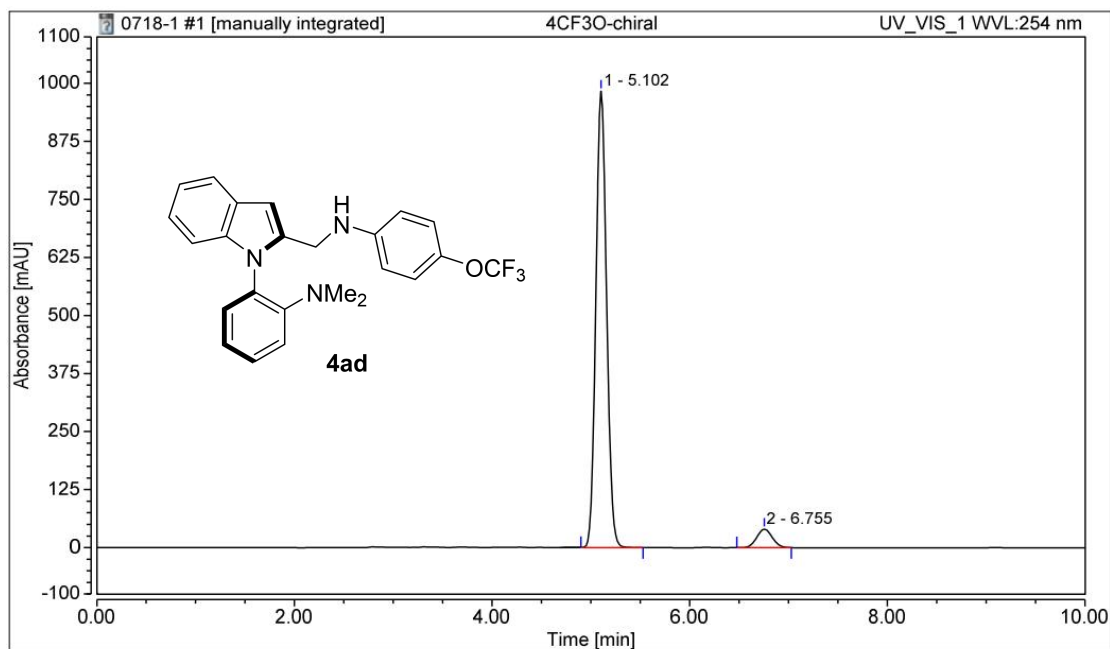

| Integration Results |           |                    |              |            |                 |                |
|---------------------|-----------|--------------------|--------------|------------|-----------------|----------------|
| No.                 | Peak Name | Retention Time min | Area mAU*min | Height mAU | Relative Area % | Asymmetry (EP) |
| 1                   |           | 5.102              | 122.446      | 983.171    | 94.37           | 1.10           |
| 2                   |           | 6.755              | 7.301        | 39.909     | 5.63            | 1.06           |
| <b>Total:</b>       |           |                    |              |            | <b>100.00</b>   |                |

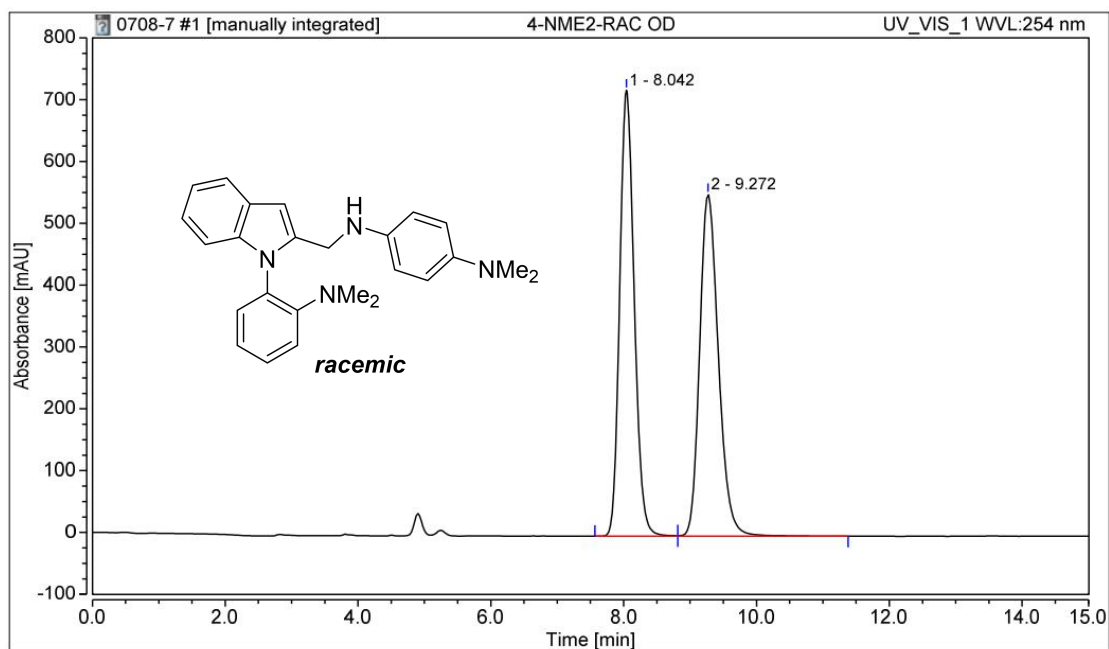

| Integration Results |           |                    |              |            |                 |                |
|---------------------|-----------|--------------------|--------------|------------|-----------------|----------------|
| No.                 | Peak Name | Retention Time min | Area mAU*min | Height mAU | Relative Area % | Asymmetry (EP) |
| 1                   |           | 8.042              | 182.300      | 721.502    | 50.20           | 1.17           |
| 2                   |           | 9.272              | 180.836      | 552.835    | 49.80           | 1.22           |
| <b>Total:</b>       |           |                    |              |            | <b>100.00</b>   |                |

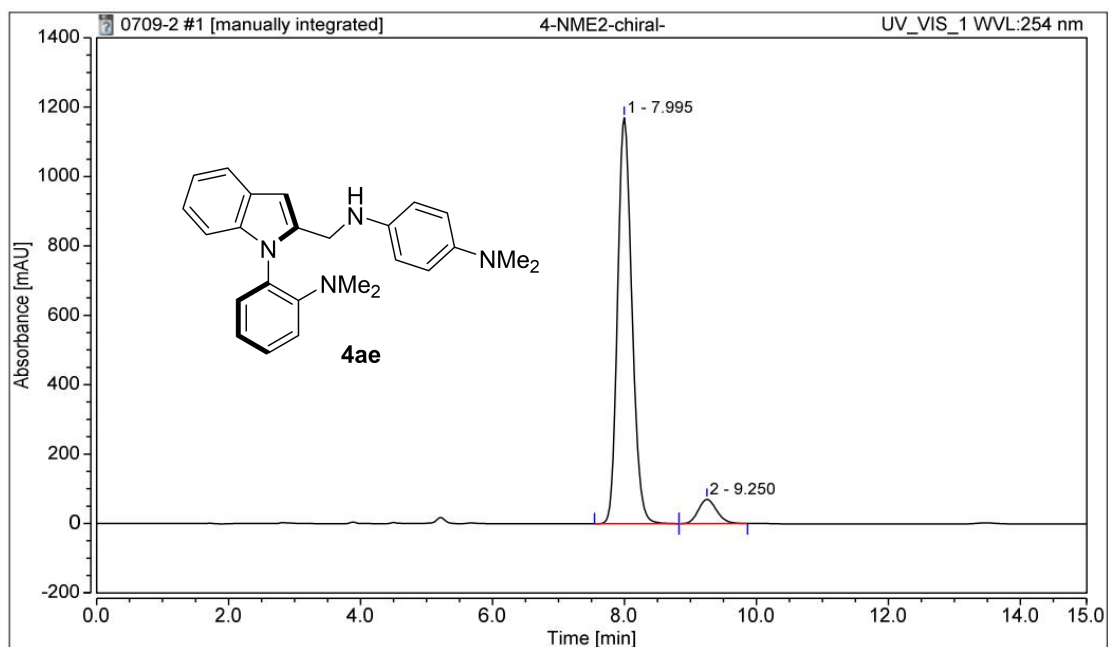

| Integration Results |           |                    |              |            |                 |                |
|---------------------|-----------|--------------------|--------------|------------|-----------------|----------------|
| No.                 | Peak Name | Retention Time min | Area mAU*min | Height mAU | Relative Area % | Asymmetry (EP) |
| 1                   |           | 7.995              | 294.973      | 1170.669   | 92.90           | 1.18           |
| 2                   |           | 9.250              | 22.539       | 69.912     | 7.10            | 1.15           |
| <b>Total:</b>       |           |                    |              |            | <b>100.00</b>   |                |



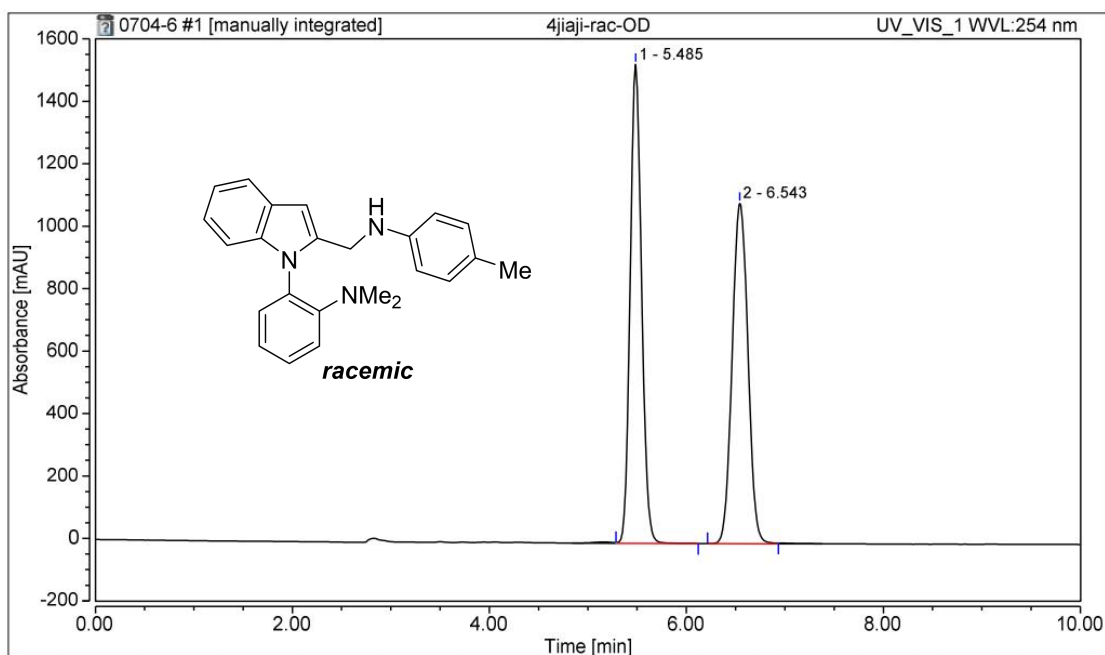

| Integration Results |           |                    |              |            |                 |                |
|---------------------|-----------|--------------------|--------------|------------|-----------------|----------------|
| No.                 | Peak Name | Retention Time min | Area mAU*min | Height mAU | Relative Area % | Asymmetry (EP) |
| 1                   |           | 5.485              | 204.949      | 1533.391   | 50.41           | 1.11           |
| 2                   |           | 6.543              | 201.652      | 1089.832   | 49.59           | 1.04           |
| <b>Total:</b>       |           |                    |              |            | <b>100.00</b>   |                |

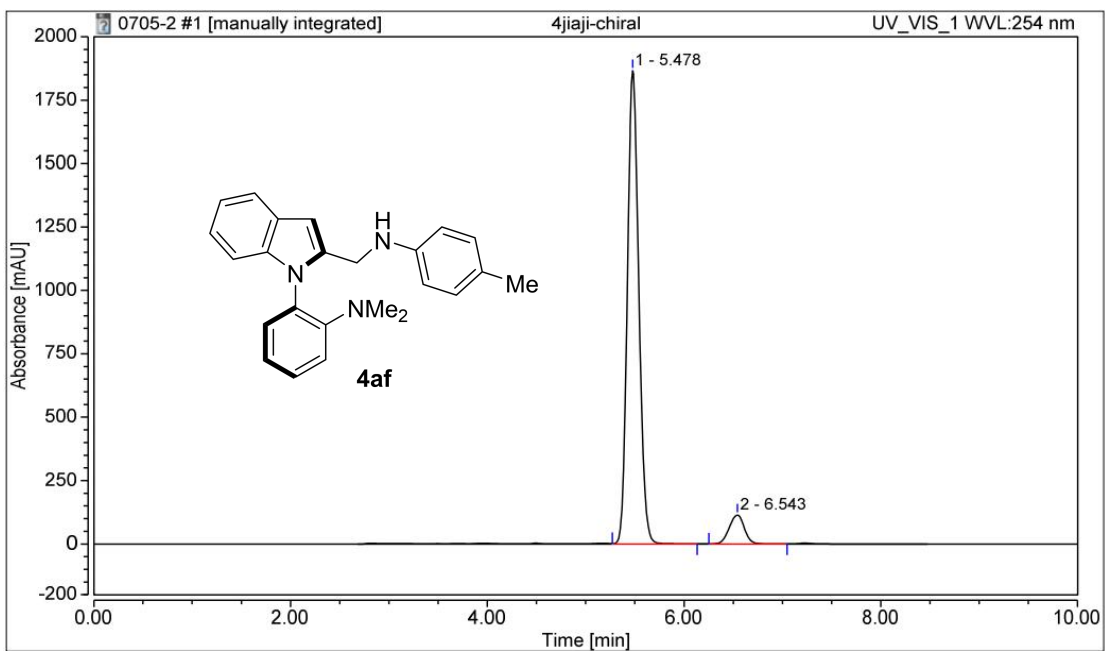

| Integration Results |           |                    |              |            |                 |                |
|---------------------|-----------|--------------------|--------------|------------|-----------------|----------------|
| No.                 | Peak Name | Retention Time min | Area mAU*min | Height mAU | Relative Area % | Asymmetry (EP) |
| 1                   |           | 5.478              | 250.429      | 1866.875   | 92.37           | 1.13           |
| 2                   |           | 6.543              | 20.672       | 114.471    | 7.63            | 0.96           |
| <b>Total:</b>       |           |                    |              |            | <b>100.00</b>   |                |

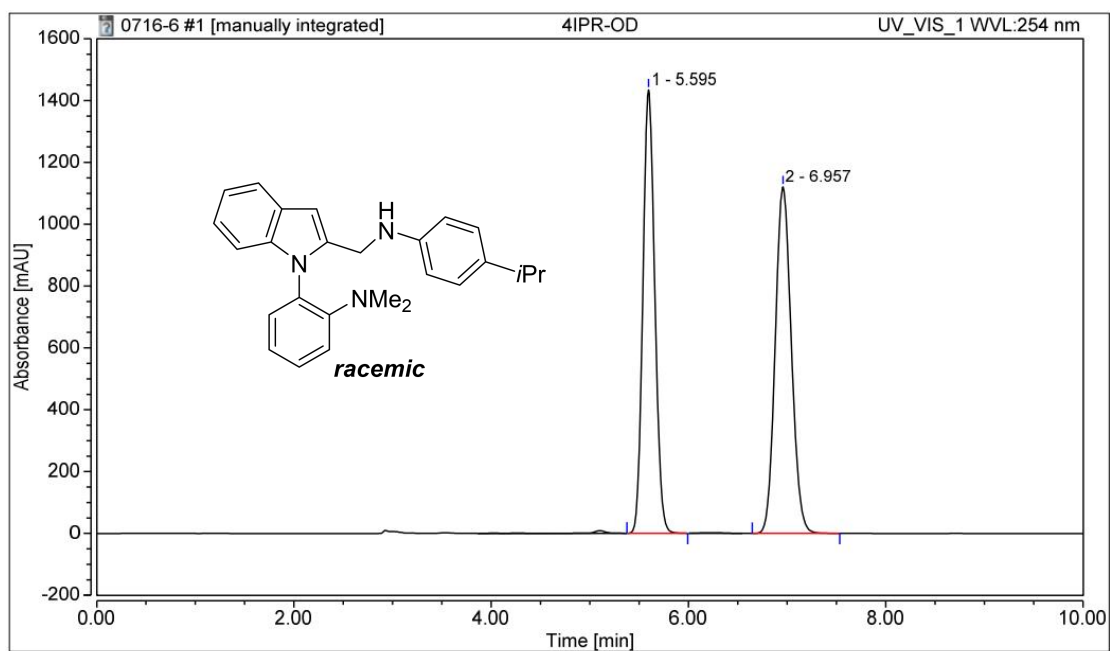

| Integration Results |           |                    |              |            |                 |                |
|---------------------|-----------|--------------------|--------------|------------|-----------------|----------------|
| No.                 | Peak Name | Retention Time min | Area mAU*min | Height mAU | Relative Area % | Asymmetry (EP) |
| 1                   |           | 5.595              | 199.732      | 1434.482   | 48.51           | 1.10           |
| 2                   |           | 6.957              | 212.037      | 1120.975   | 51.49           | 1.10           |
| <b>Total:</b>       |           |                    |              |            | <b>100.00</b>   |                |

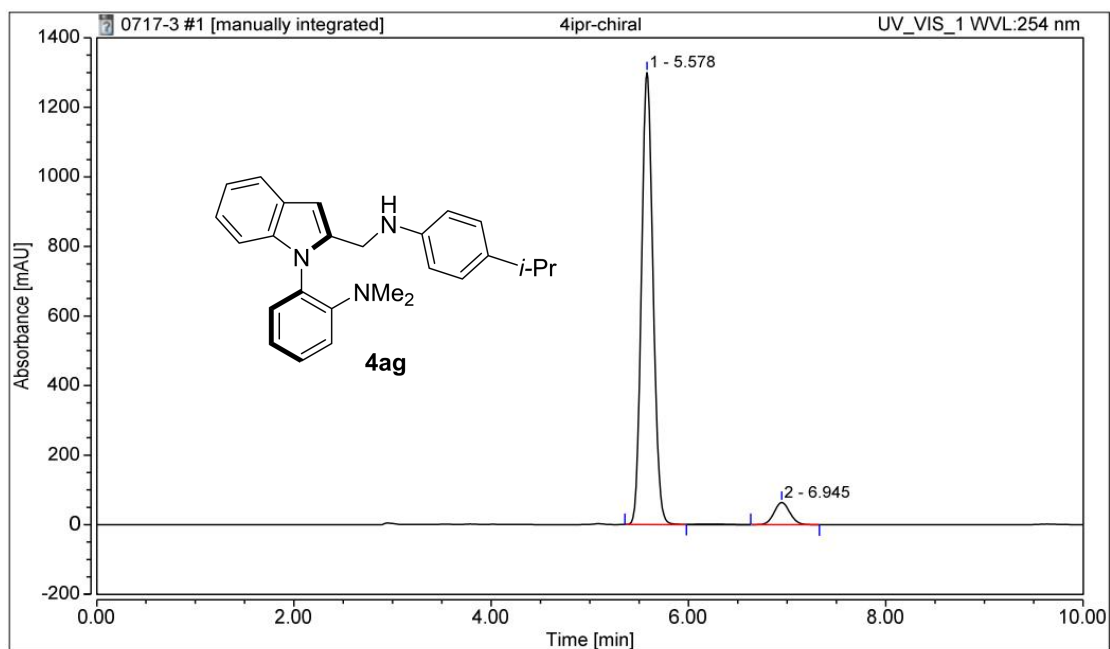

| Integration Results |           |                    |              |            |                 |                |
|---------------------|-----------|--------------------|--------------|------------|-----------------|----------------|
| No.                 | Peak Name | Retention Time min | Area mAU*min | Height mAU | Relative Area % | Asymmetry (EP) |
| 1                   |           | 5.578              | 175.795      | 1299.502   | 93.68           | 1.11           |
| 2                   |           | 6.945              | 11.870       | 64.009     | 6.32            | 1.07           |
| <b>Total:</b>       |           |                    |              |            | <b>100.00</b>   |                |

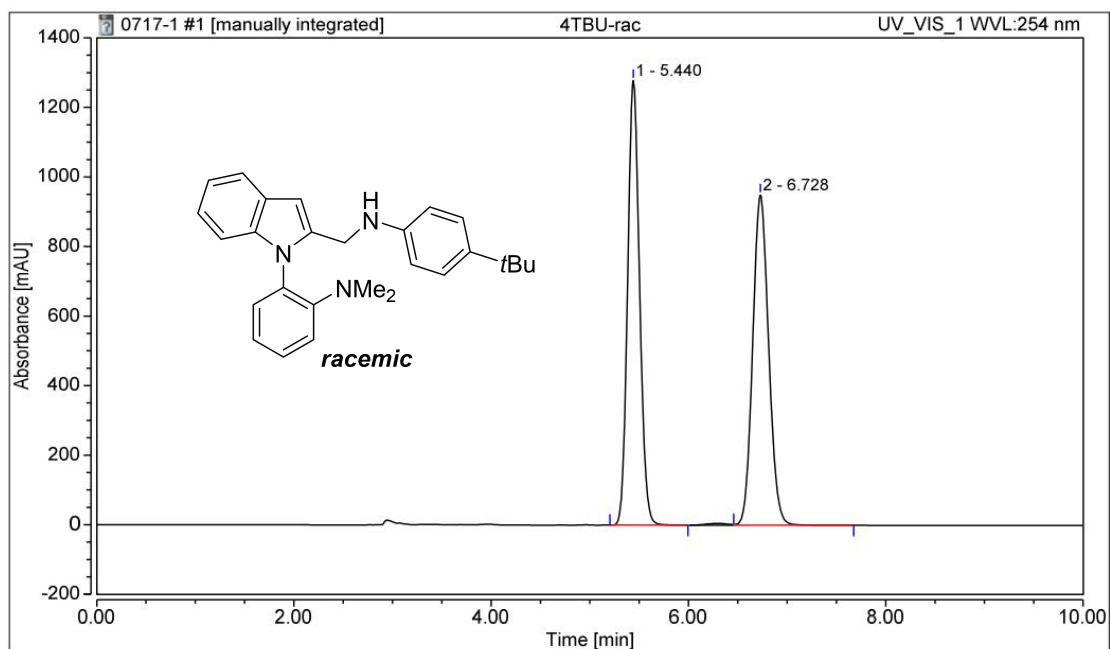

| Integration Results |           |                    |              |            |                 |                |
|---------------------|-----------|--------------------|--------------|------------|-----------------|----------------|
| No.                 | Peak Name | Retention Time min | Area mAU*min | Height mAU | Relative Area % | Asymmetry (EP) |
| 1                   |           | 5.440              | 179.214      | 1278.330   | 50.18           | 1.11           |
| 2                   |           | 6.728              | 177.960      | 949.679    | 49.82           | 1.09           |
| <b>Total:</b>       |           |                    |              |            | <b>100.00</b>   |                |

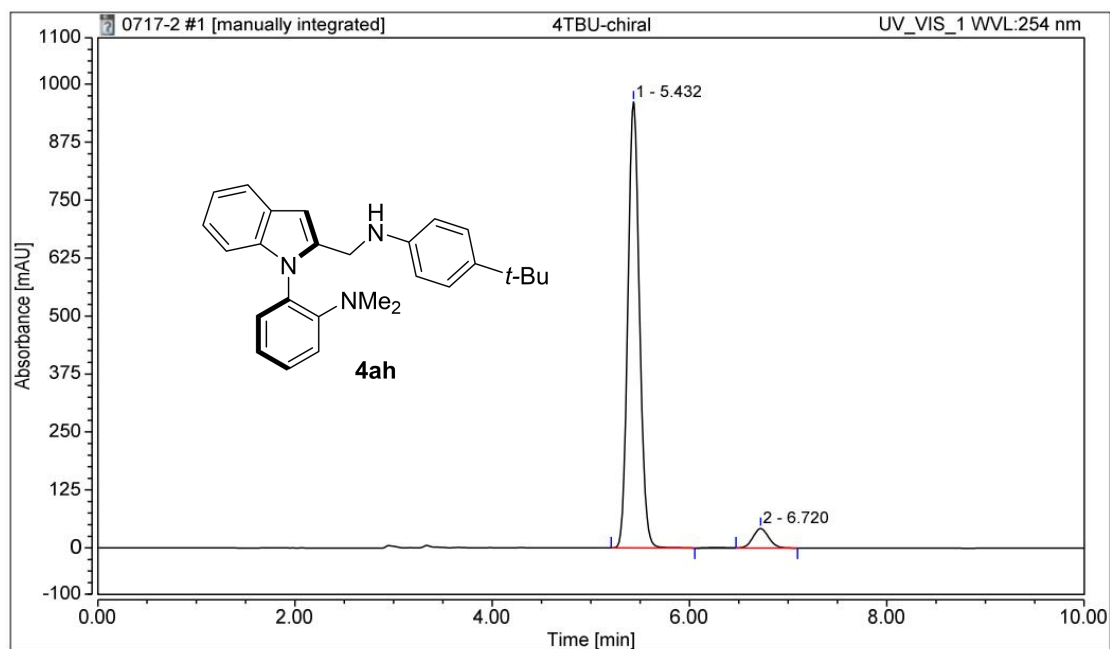

| Integration Results |           |                    |              |            |                 |                |
|---------------------|-----------|--------------------|--------------|------------|-----------------|----------------|
| No.                 | Peak Name | Retention Time min | Area mAU*min | Height mAU | Relative Area % | Asymmetry (EP) |
| 1                   |           | 5.432              | 131.089      | 961.738    | 94.38           | 1.10           |
| 2                   |           | 6.720              | 7.800        | 42.065     | 5.62            | 1.07           |
| <b>Total:</b>       |           |                    |              |            | <b>100.00</b>   |                |

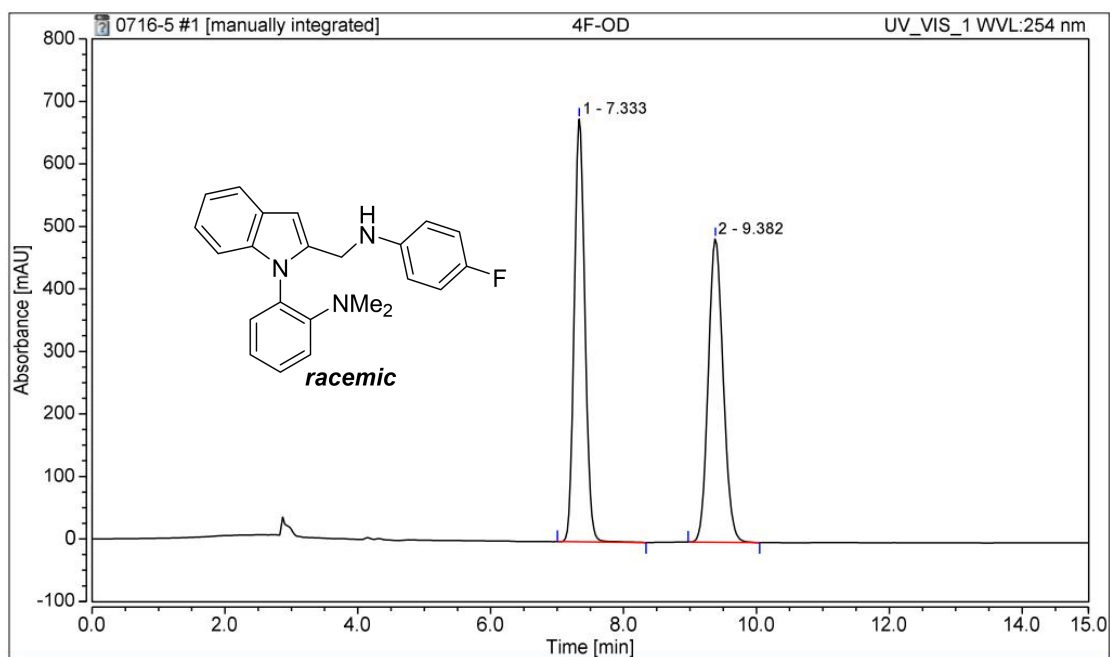

| Integration Results |           |                    |              |            |                 |                |
|---------------------|-----------|--------------------|--------------|------------|-----------------|----------------|
| No.                 | Peak Name | Retention Time min | Area mAU*min | Height mAU | Relative Area % | Asymmetry (EP) |
| 1                   |           | 7.333              | 125.567      | 676.090    | 49.74           | 1.11           |
| 2                   |           | 9.382              | 126.867      | 485.732    | 50.26           | 1.11           |
| <b>Total:</b>       |           |                    |              |            | <b>100.00</b>   |                |

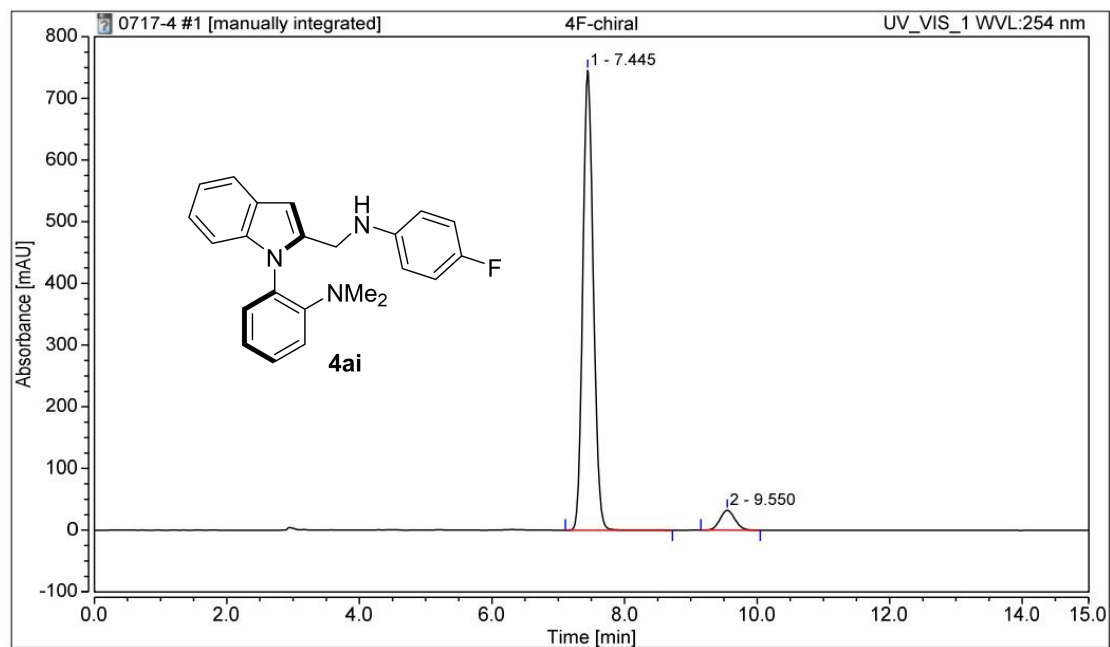

| Integration Results |           |                    |              |            |                 |                |
|---------------------|-----------|--------------------|--------------|------------|-----------------|----------------|
| No.                 | Peak Name | Retention Time min | Area mAU*min | Height mAU | Relative Area % | Asymmetry (EP) |
| 1                   |           | 7.445              | 137.323      | 745.429    | 94.23           | 1.12           |
| 2                   |           | 9.550              | 8.407        | 32.144     | 5.77            | 1.08           |
| <b>Total:</b>       |           |                    |              |            | <b>100.00</b>   |                |

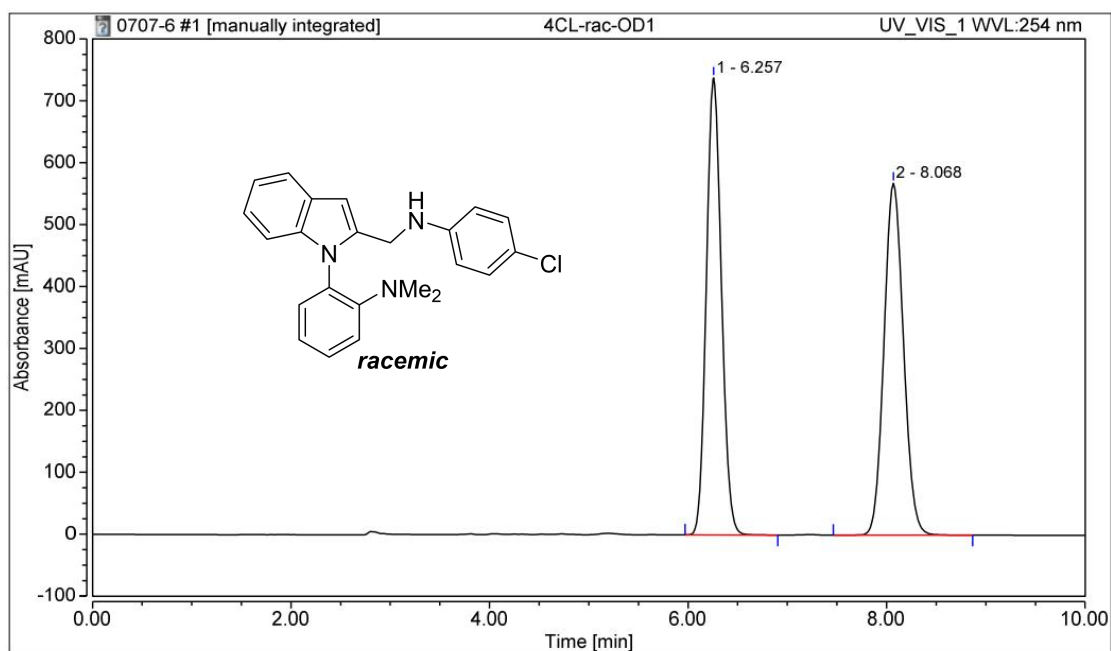

| Integration Results |           |                    |              |            |                 |                |
|---------------------|-----------|--------------------|--------------|------------|-----------------|----------------|
| No.                 | Peak Name | Retention Time min | Area mAU*min | Height mAU | Relative Area % | Asymmetry (EP) |
| 1                   |           | 6.257              | 129.941      | 738.385    | 50.16           | 1.11           |
| 2                   |           | 8.068              | 129.119      | 568.365    | 49.84           | 1.09           |
| <b>Total:</b>       |           |                    |              |            | <b>100.00</b>   |                |

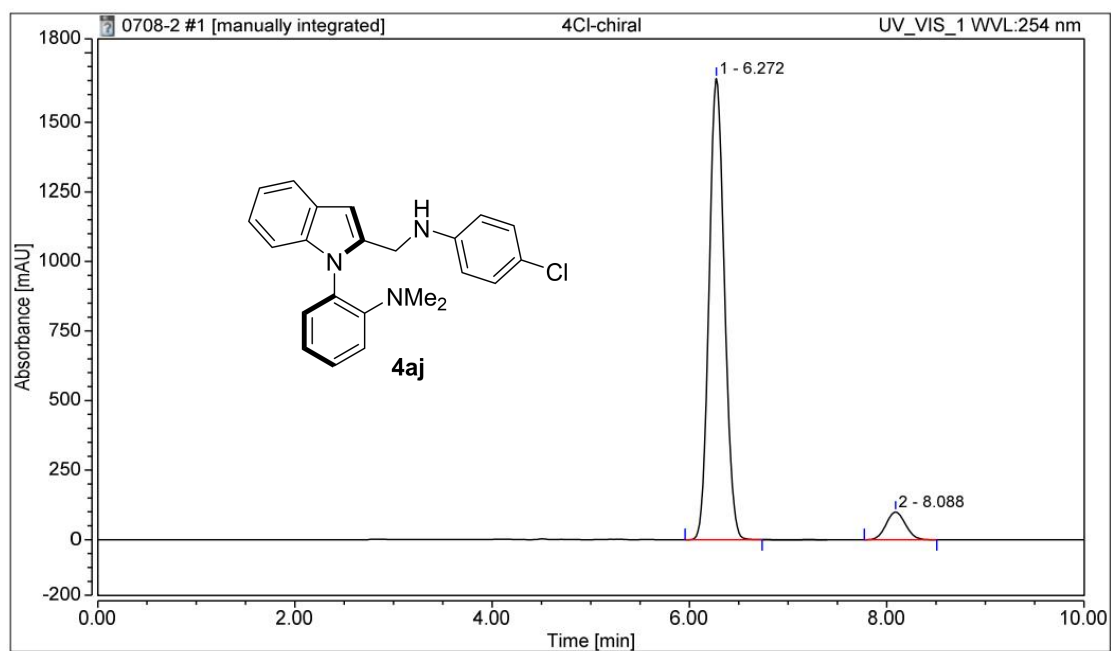

| Integration Results |           |                    |              |            |                 |                |
|---------------------|-----------|--------------------|--------------|------------|-----------------|----------------|
| No.                 | Peak Name | Retention Time min | Area mAU*min | Height mAU | Relative Area % | Asymmetry (EP) |
| 1                   |           | 6.272              | 299.421      | 1658.053   | 92.96           | 1.10           |
| 2                   |           | 8.088              | 22.690       | 99.285     | 7.04            | 1.07           |
| <b>Total:</b>       |           |                    |              |            | <b>100.00</b>   |                |

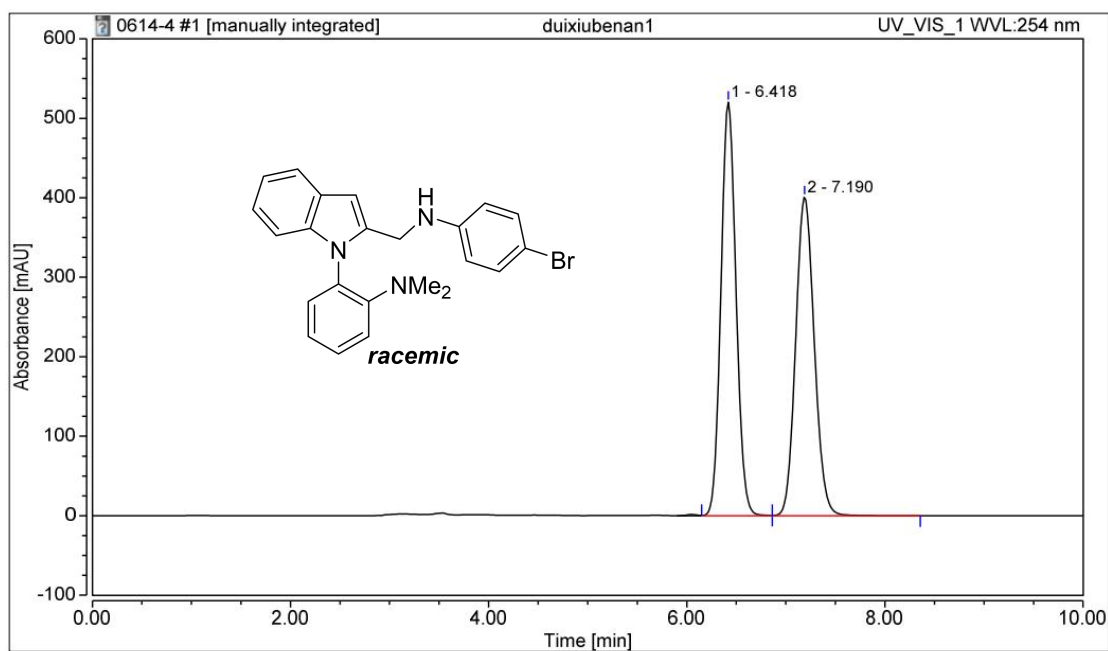

| Integration Results |           |                    |              |            |                 |                |
|---------------------|-----------|--------------------|--------------|------------|-----------------|----------------|
| No.                 | Peak Name | Retention Time min | Area mAU*min | Height mAU | Relative Area % | Asymmetry (EP) |
| 1                   |           | 6.418              | 91.699       | 520.186    | 51.19           | 1.08           |
| 2                   |           | 7.190              | 87.439       | 401.188    | 48.81           | 1.10           |
| <b>Total:</b>       |           |                    |              |            | <b>100.00</b>   |                |

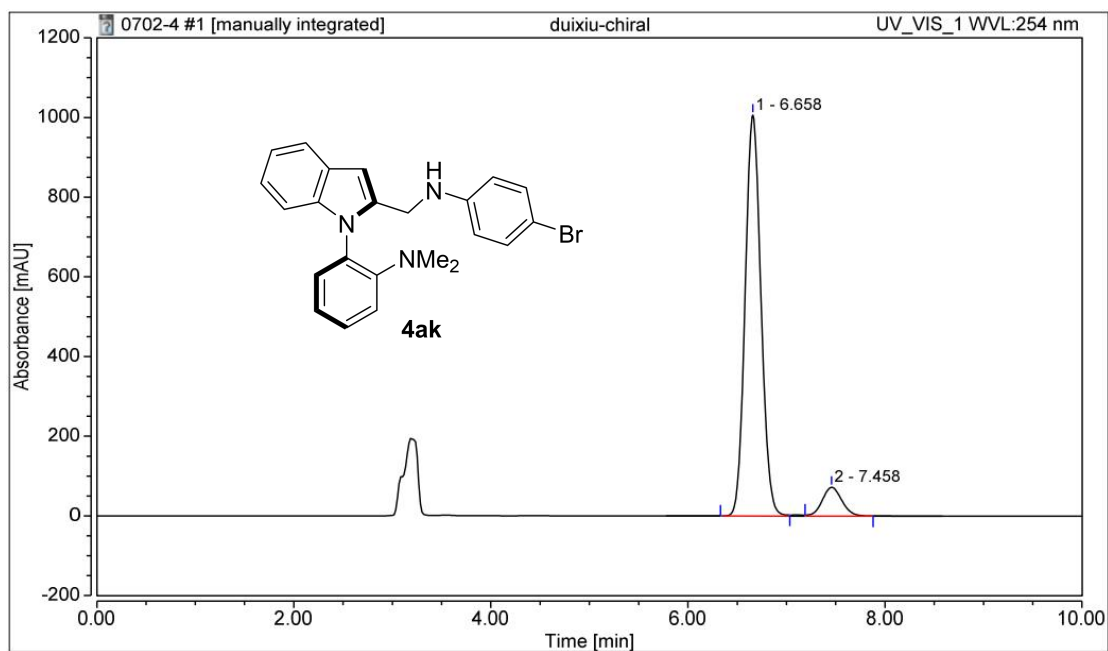

| Integration Results |           |                    |              |            |                 |                |
|---------------------|-----------|--------------------|--------------|------------|-----------------|----------------|
| No.                 | Peak Name | Retention Time min | Area mAU*min | Height mAU | Relative Area % | Asymmetry (EP) |
| 1                   |           | 6.658              | 187.052      | 1006.439   | 91.80           | 1.09           |
| 2                   |           | 7.458              | 16.701       | 72.206     | 8.20            | 1.08           |
| <b>Total:</b>       |           |                    |              |            | <b>100.00</b>   |                |

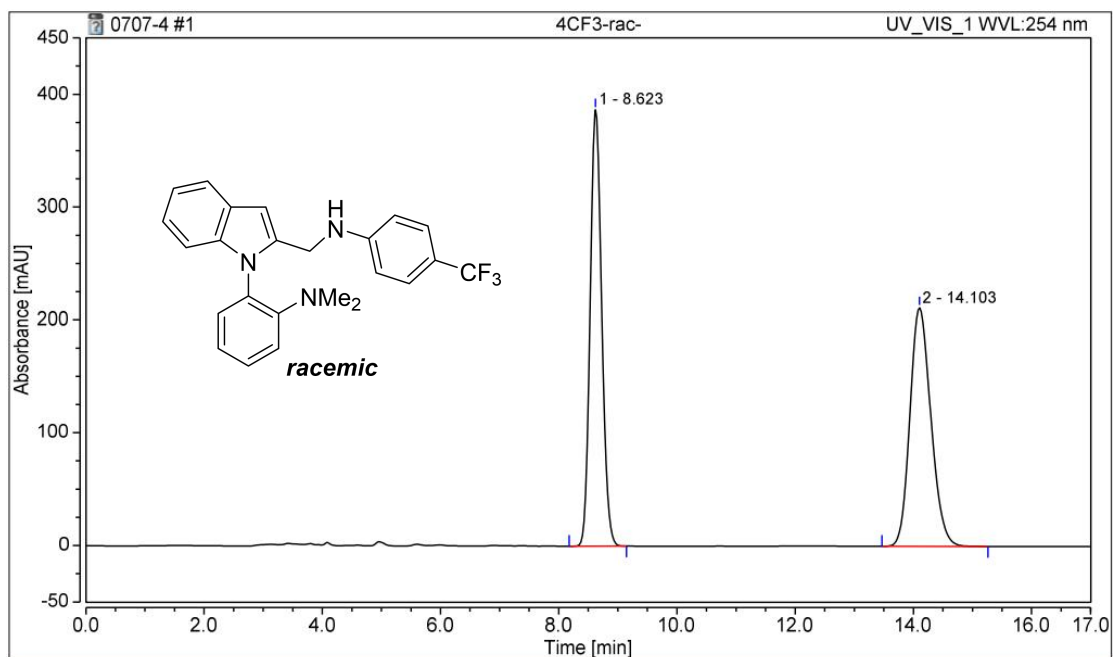

| Integration Results |           |                    |              |            |                 |                |
|---------------------|-----------|--------------------|--------------|------------|-----------------|----------------|
| No.                 | Peak Name | Retention Time min | Area mAU*min | Height mAU | Relative Area % | Asymmetry (EP) |
| 1                   |           | 8.623              | 86.578       | 386.704    | 49.88           | 1.13           |
| 2                   |           | 14.103             | 87.008       | 211.518    | 50.12           | 1.18           |
| <b>Total:</b>       |           |                    |              |            | <b>100.00</b>   |                |

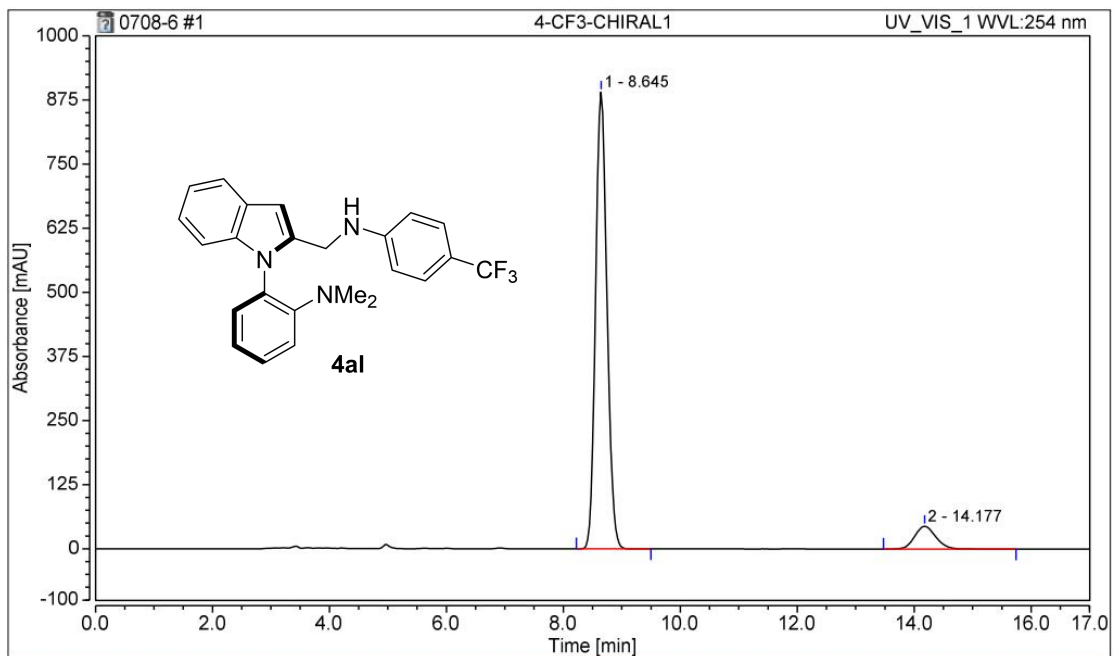

| Integration Results |           |                    |              |            |                 |                |
|---------------------|-----------|--------------------|--------------|------------|-----------------|----------------|
| No.                 | Peak Name | Retention Time min | Area mAU*min | Height mAU | Relative Area % | Asymmetry (EP) |
| 1                   |           | 8.645              | 200.805      | 890.584    | 91.56           | 1.12           |
| 2                   |           | 14.177             | 18.504       | 44.227     | 8.44            | 1.13           |
| <b>Total:</b>       |           |                    |              |            | <b>100.00</b>   |                |



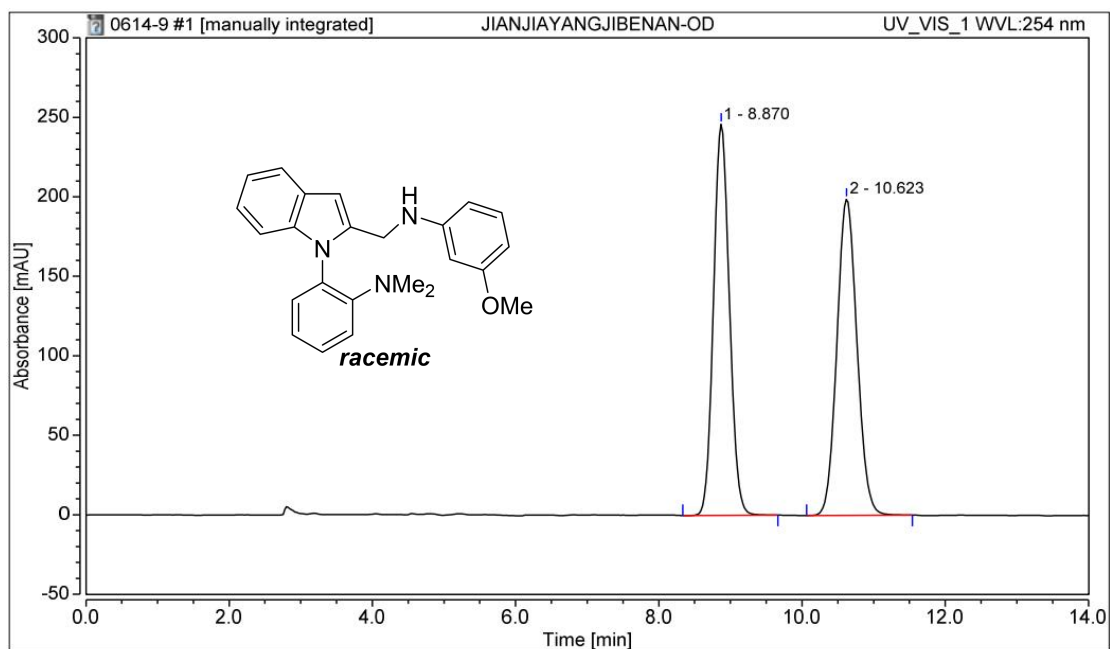

| Integration Results |           |                    |              |            |                 |                |
|---------------------|-----------|--------------------|--------------|------------|-----------------|----------------|
| No.                 | Peak Name | Retention Time min | Area mAU*min | Height mAU | Relative Area % | Asymmetry (EP) |
| 1                   |           | 8.870              | 63.285       | 246.062    | 49.48           | 1.09           |
| 2                   |           | 10.623             | 64.614       | 198.919    | 50.52           | 1.08           |
| <b>Total:</b>       |           |                    |              |            | <b>100.00</b>   |                |

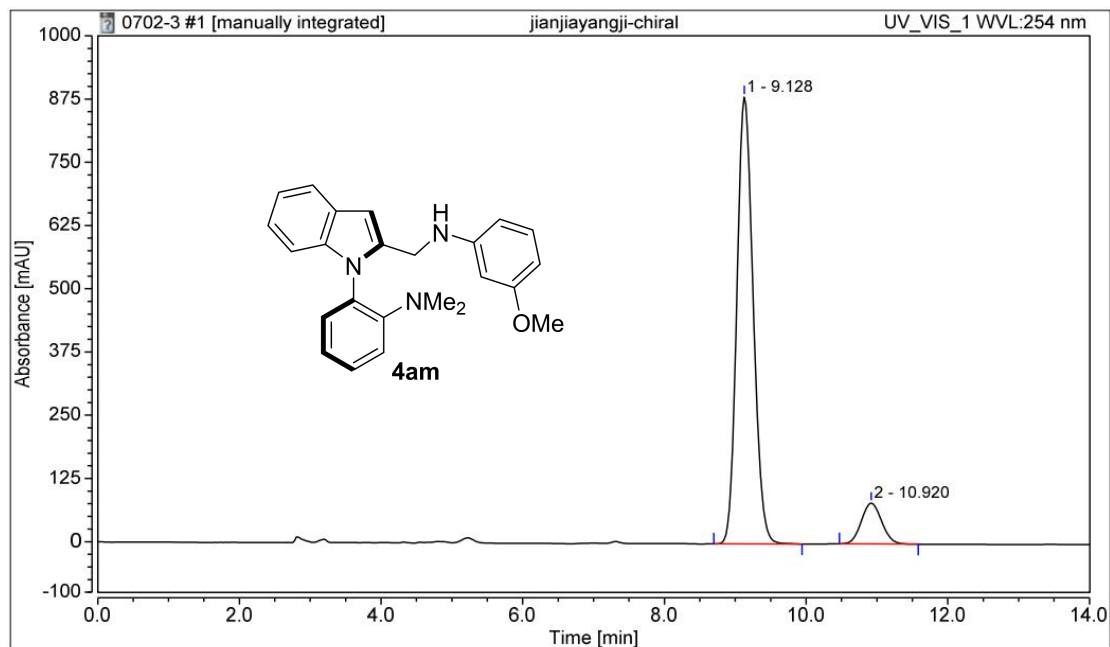

| Integration Results |           |                    |              |            |                 |                |
|---------------------|-----------|--------------------|--------------|------------|-----------------|----------------|
| No.                 | Peak Name | Retention Time min | Area mAU*min | Height mAU | Relative Area % | Asymmetry (EP) |
| 1                   |           | 9.128              | 235.889      | 883.848    | 89.80           | 1.15           |
| 2                   |           | 10.920             | 26.808       | 80.632     | 10.20           | 1.08           |
| <b>Total:</b>       |           |                    |              |            | <b>100.00</b>   |                |



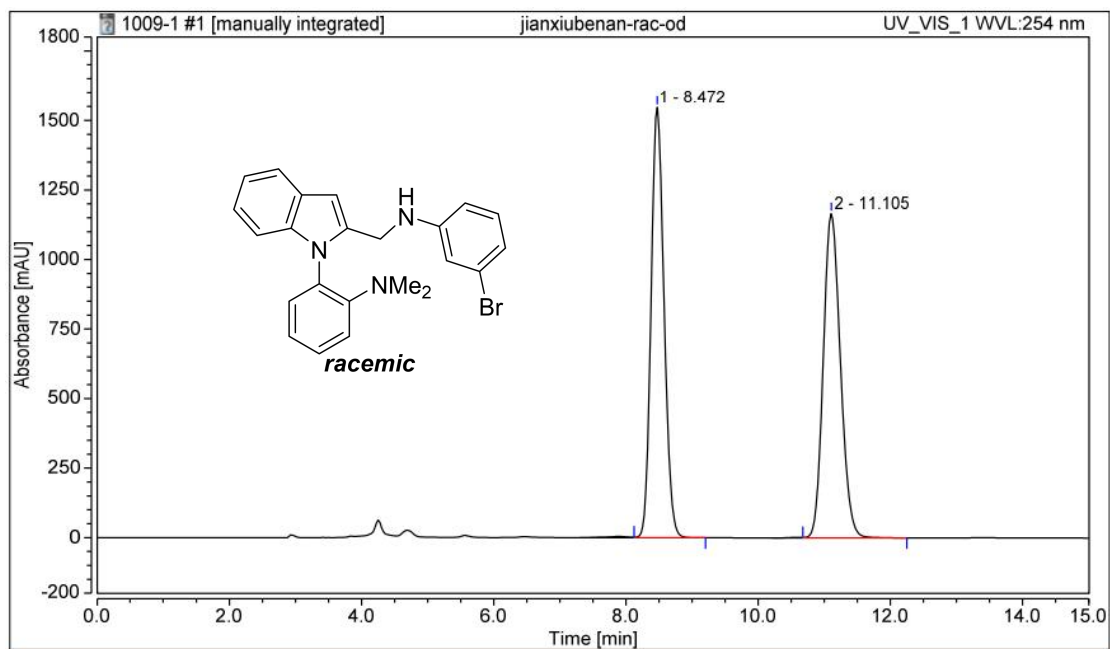

| Integration Results |           |                    |              |            |                 |                |
|---------------------|-----------|--------------------|--------------|------------|-----------------|----------------|
| No.                 | Peak Name | Retention Time min | Area mAU*min | Height mAU | Relative Area % | Asymmetry (EP) |
| 1                   |           | 8.472              | 351.196      | 1548.470   | 50.09           | 1.14           |
| 2                   |           | 11.105             | 349.880      | 1166.652   | 49.91           | 1.15           |
| <b>Total:</b>       |           |                    |              |            | <b>100.00</b>   |                |

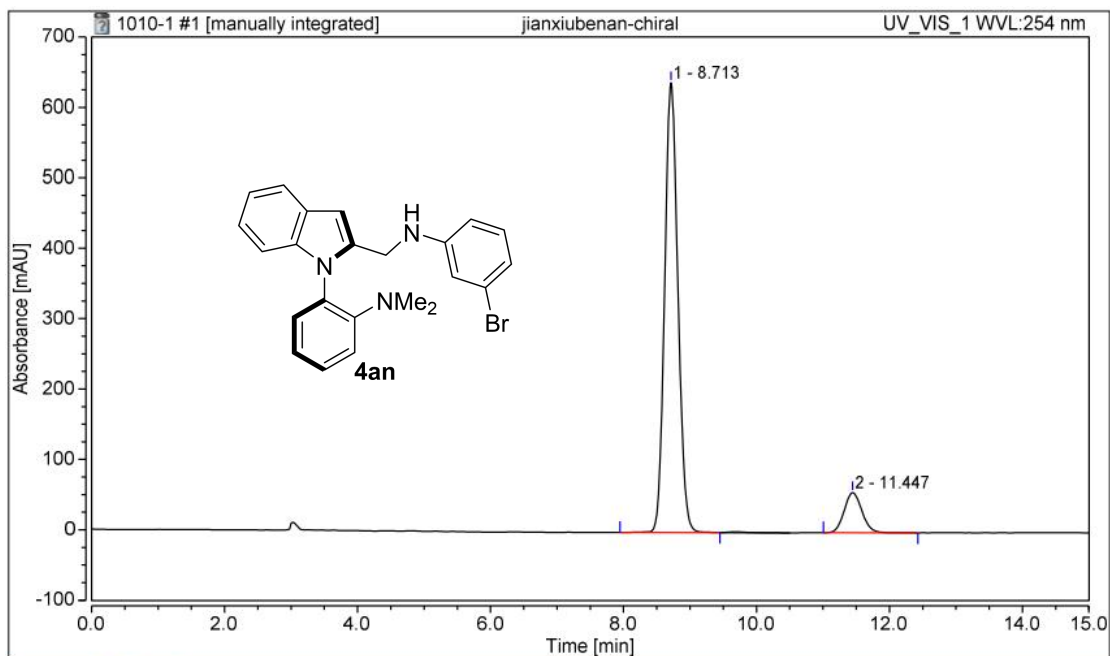

| Integration Results |           |                    |              |            |                 |                |
|---------------------|-----------|--------------------|--------------|------------|-----------------|----------------|
| No.                 | Peak Name | Retention Time min | Area mAU*min | Height mAU | Relative Area % | Asymmetry (EP) |
| 1                   |           | 8.713              | 147.469      | 638.971    | 89.32           | 1.10           |
| 2                   |           | 11.447             | 17.633       | 56.922     | 10.68           | 1.10           |
| <b>Total:</b>       |           |                    |              |            | <b>100.00</b>   |                |

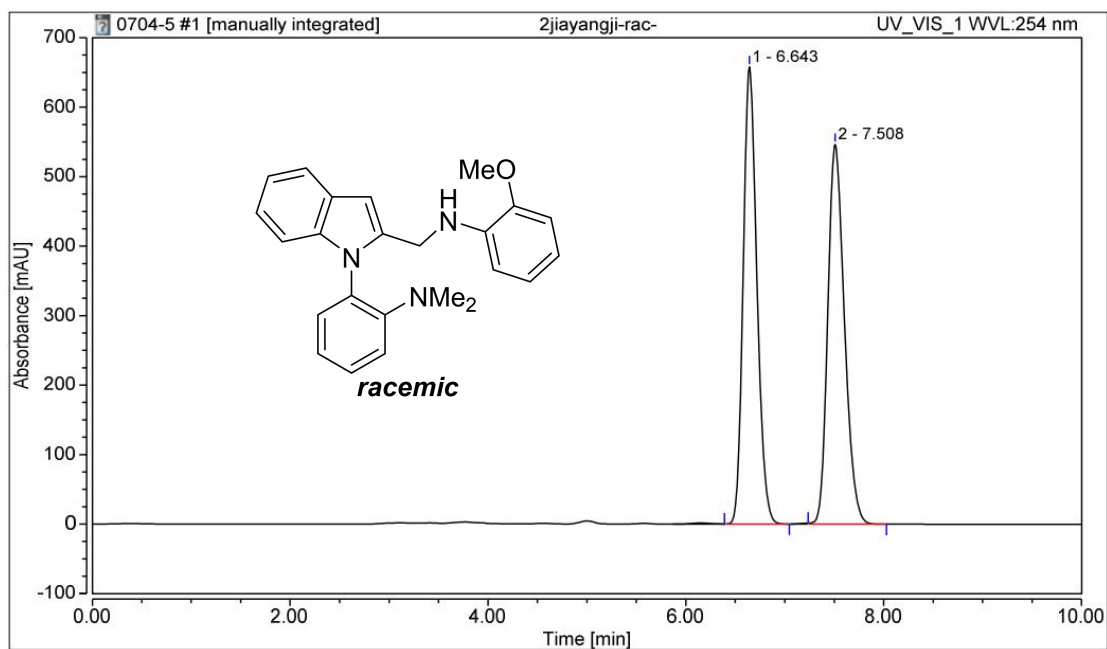

| Integration Results |           |                    |              |            |                 |                |
|---------------------|-----------|--------------------|--------------|------------|-----------------|----------------|
| No.                 | Peak Name | Retention Time min | Area mAU*min | Height mAU | Relative Area % | Asymmetry (EP) |
| 1                   |           | 6.643              | 106.183      | 658.142    | 49.98           | 1.18           |
| 2                   |           | 7.508              | 106.279      | 546.455    | 50.02           | 1.24           |
| <b>Total:</b>       |           |                    |              |            | <b>100.00</b>   |                |

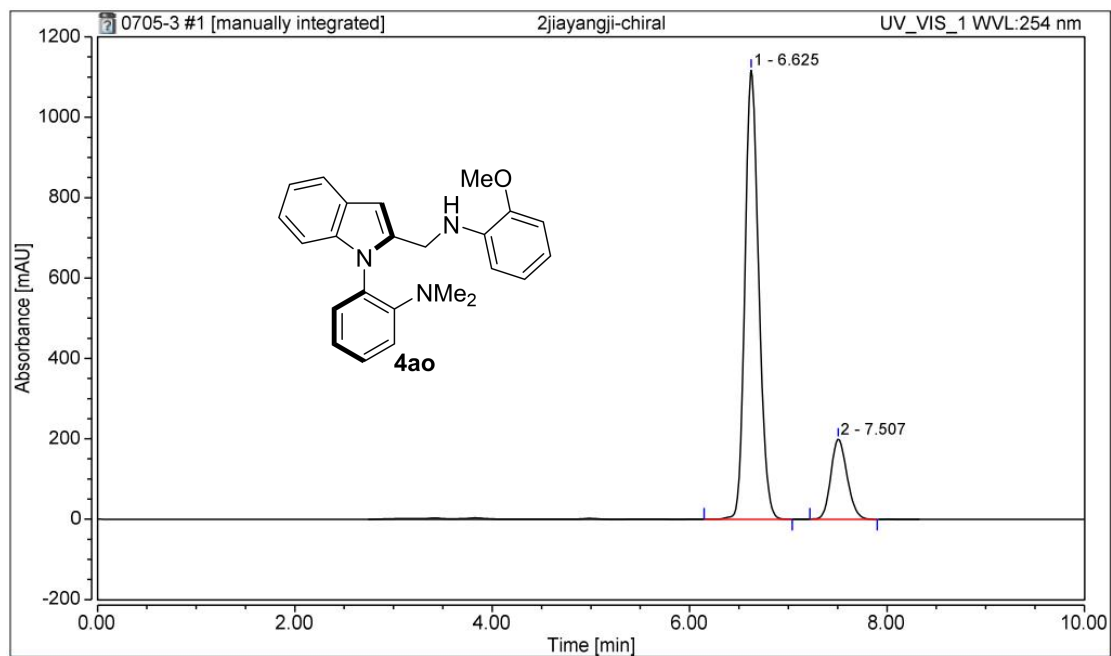

| Integration Results |           |                    |              |            |                 |                |
|---------------------|-----------|--------------------|--------------|------------|-----------------|----------------|
| No.                 | Peak Name | Retention Time min | Area mAU*min | Height mAU | Relative Area % | Asymmetry (EP) |
| 1                   |           | 6.625              | 180.729      | 1117.103   | 82.54           | 1.17           |
| 2                   |           | 7.507              | 38.238       | 199.478    | 17.46           | 1.16           |
| <b>Total:</b>       |           |                    |              |            | <b>100.00</b>   |                |

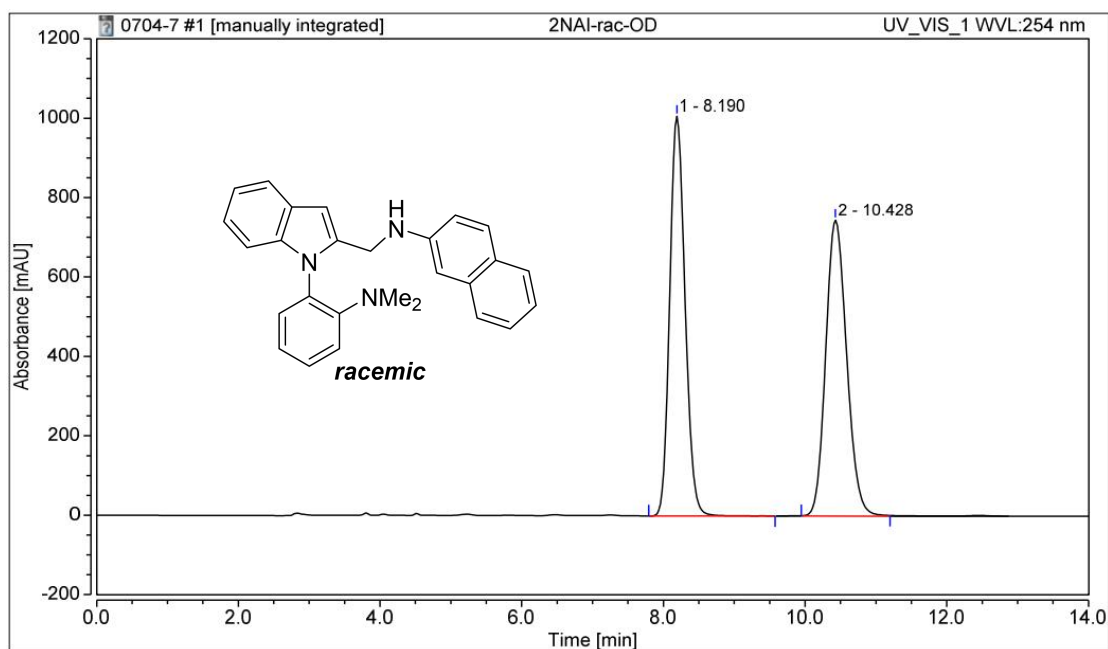

| Integration Results |           |                    |              |            |                 |                |
|---------------------|-----------|--------------------|--------------|------------|-----------------|----------------|
| No.                 | Peak Name | Retention Time min | Area mAU*min | Height mAU | Relative Area % | Asymmetry (EP) |
| 1                   |           | 8.190              | 251.758      | 1007.118   | 49.61           | 1.15           |
| 2                   |           | 10.428             | 255.680      | 745.598    | 50.39           | 1.15           |
| <b>Total:</b>       |           |                    |              |            | <b>100.00</b>   |                |

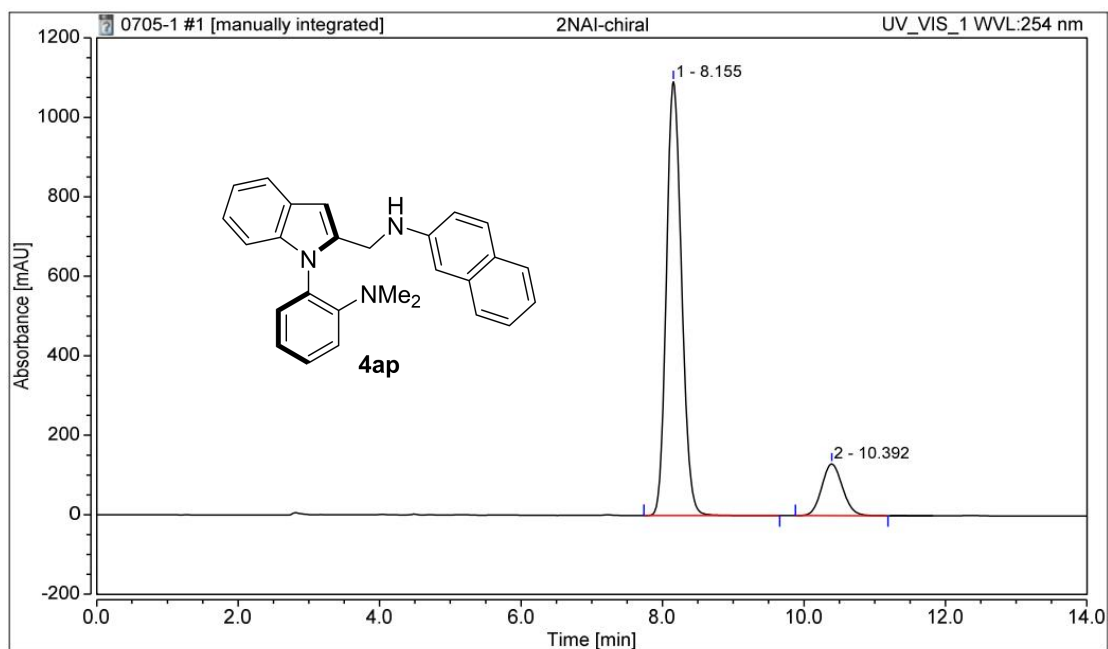

| Integration Results |           |                    |              |            |                 |                |
|---------------------|-----------|--------------------|--------------|------------|-----------------|----------------|
| No.                 | Peak Name | Retention Time min | Area mAU*min | Height mAU | Relative Area % | Asymmetry (EP) |
| 1                   |           | 8.155              | 272.799      | 1091.382   | 85.98           | 1.14           |
| 2                   |           | 10.392             | 44.489       | 130.367    | 14.02           | 1.10           |
| <b>Total:</b>       |           |                    |              |            | <b>100.00</b>   |                |

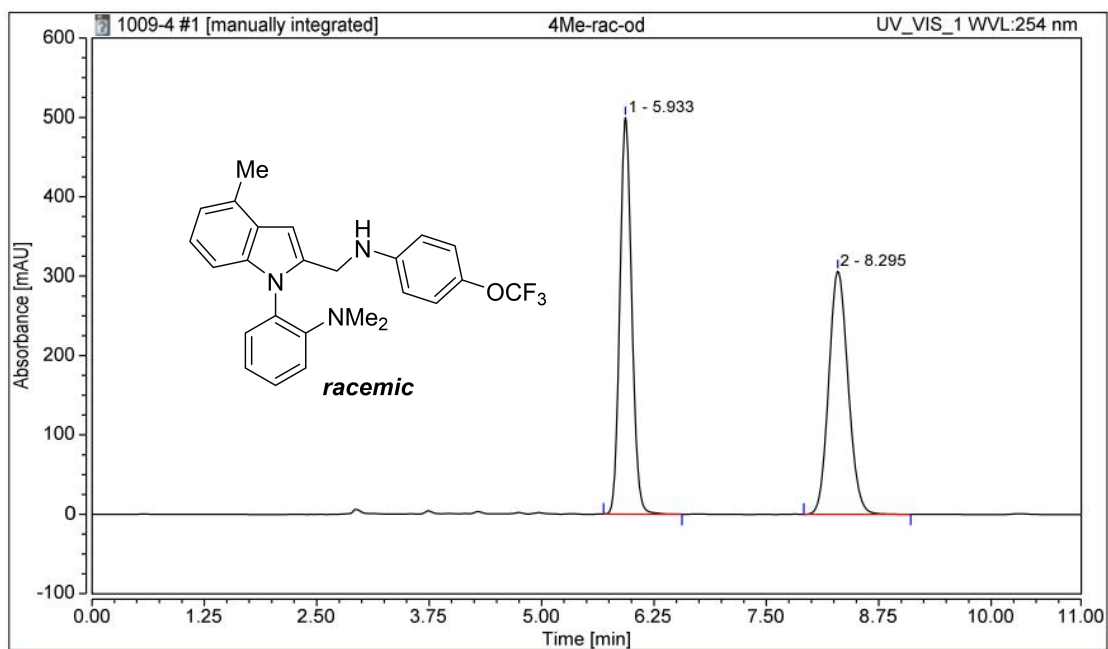

| Integration Results |           |                    |              |            |                 |                |
|---------------------|-----------|--------------------|--------------|------------|-----------------|----------------|
| No.                 | Peak Name | Retention Time min | Area mAU*min | Height mAU | Relative Area % | Asymmetry (EP) |
| 1                   |           | 5.933              | 76.496       | 499.547    | 50.07           | 1.11           |
| 2                   |           | 8.295              | 76.292       | 306.642    | 49.93           | 1.11           |
| <b>Total:</b>       |           |                    |              |            | <b>100.00</b>   |                |

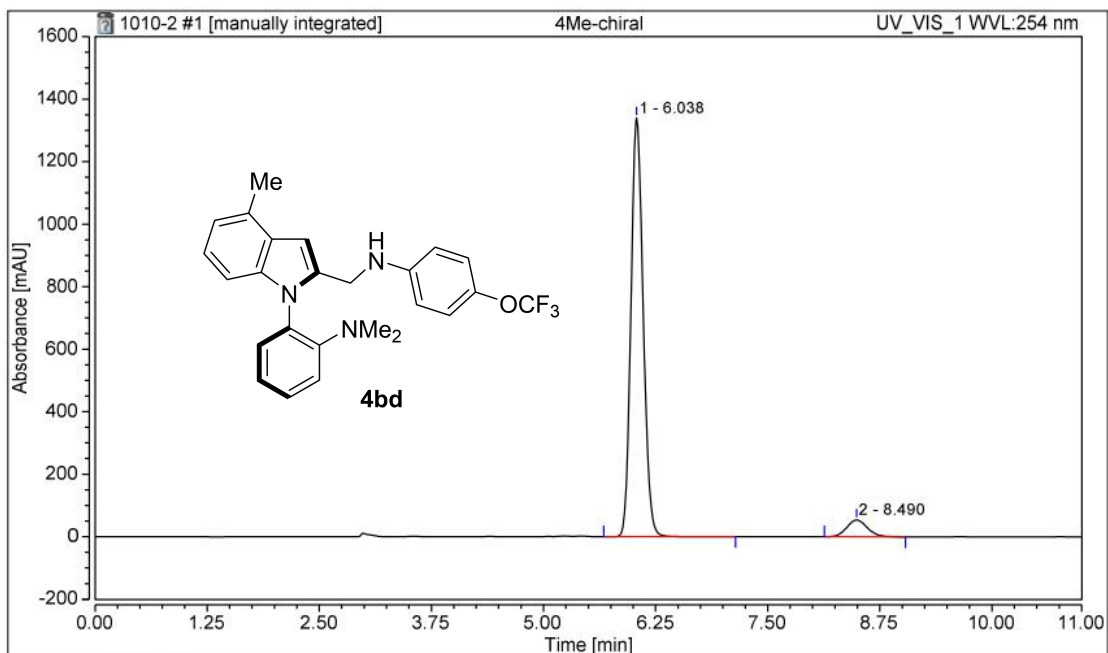

| Integration Results |           |                    |              |            |                 |                |
|---------------------|-----------|--------------------|--------------|------------|-----------------|----------------|
| No.                 | Peak Name | Retention Time min | Area mAU*min | Height mAU | Relative Area % | Asymmetry (EP) |
| 1                   |           | 6.038              | 211.108      | 1340.015   | 93.66           | 1.14           |
| 2                   |           | 8.490              | 14.293       | 53.387     | 6.34            | 1.11           |
| <b>Total:</b>       |           |                    |              |            | <b>100.00</b>   |                |

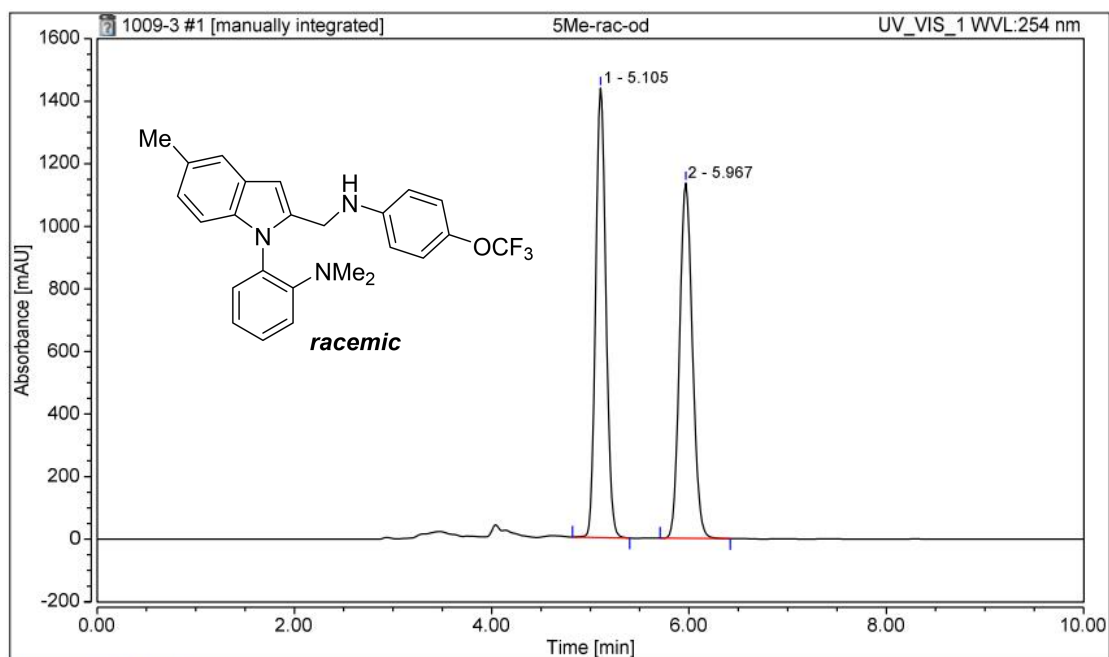

| Integration Results |           |                    |              |            |                 |                |
|---------------------|-----------|--------------------|--------------|------------|-----------------|----------------|
| No.                 | Peak Name | Retention Time min | Area mAU*min | Height mAU | Relative Area % | Asymmetry (EP) |
| 1                   |           | 5.105              | 172.615      | 1437.081   | 50.02           | 1.09           |
| 2                   |           | 5.967              | 172.483      | 1136.783   | 49.98           | 1.11           |
| <b>Total:</b>       |           |                    |              |            | <b>100.00</b>   |                |

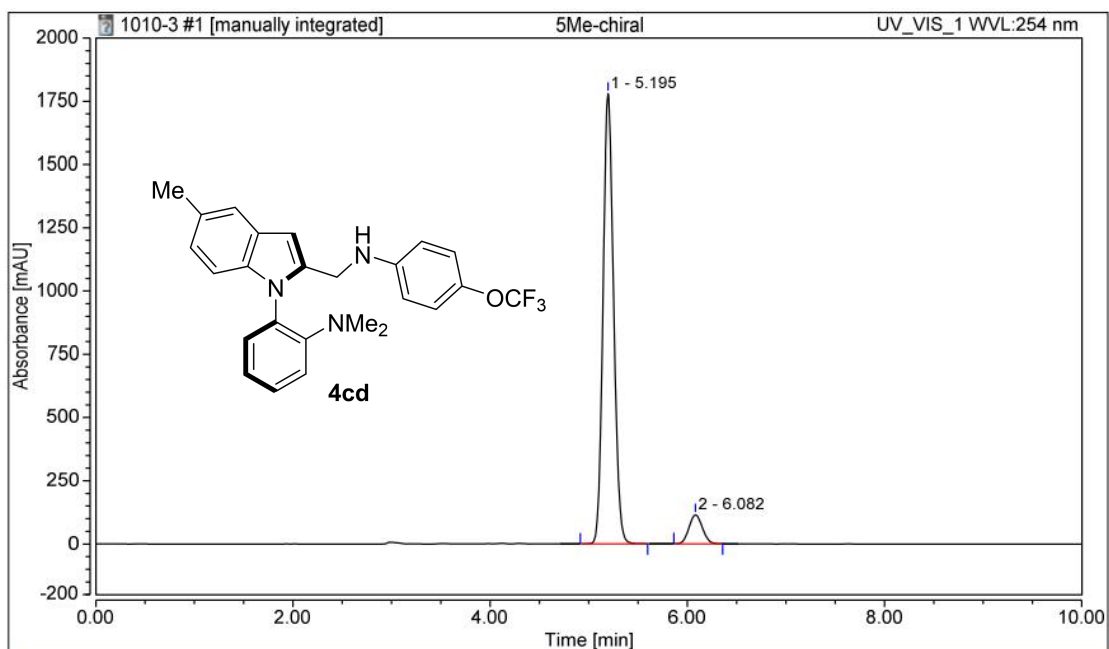

| Integration Results |           |                    |              |            |                 |                |
|---------------------|-----------|--------------------|--------------|------------|-----------------|----------------|
| No.                 | Peak Name | Retention Time min | Area mAU*min | Height mAU | Relative Area % | Asymmetry (EP) |
| 1                   |           | 5.195              | 221.012      | 1780.904   | 92.38           | 1.12           |
| 2                   |           | 6.082              | 18.219       | 115.266    | 7.62            | 1.08           |
| <b>Total:</b>       |           |                    |              |            | <b>100.00</b>   |                |

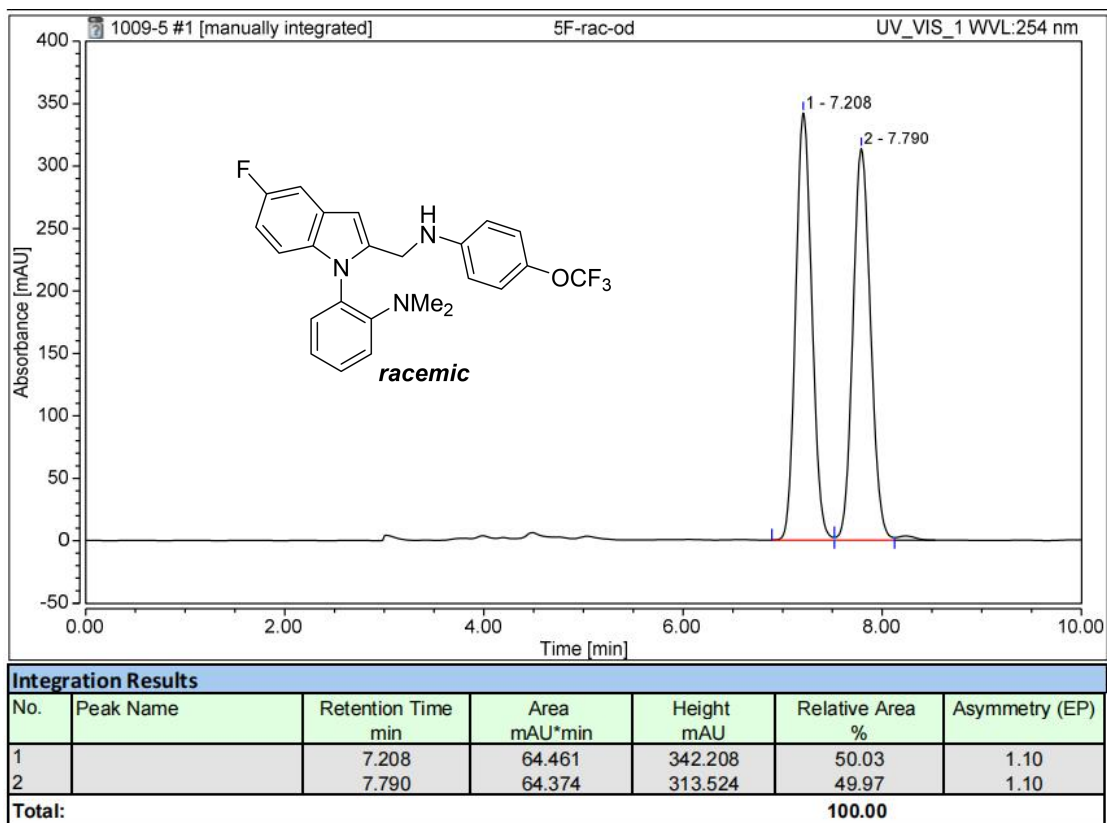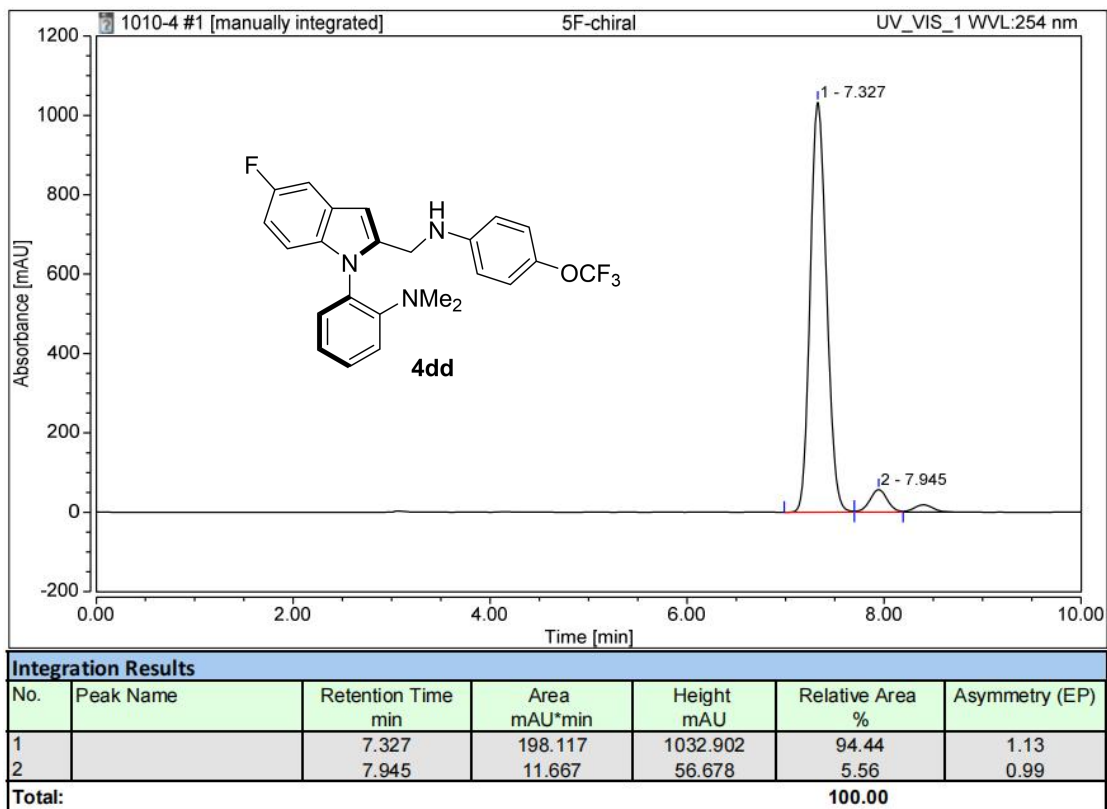

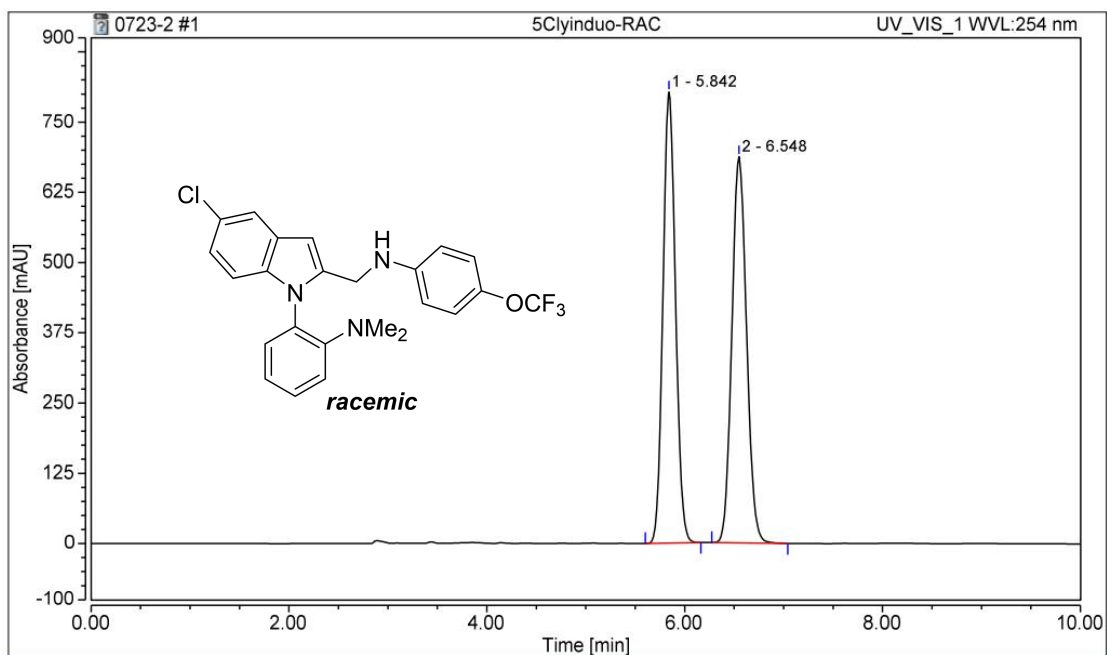

| Integration Results |           |                       |                 |               |                    |                |
|---------------------|-----------|-----------------------|-----------------|---------------|--------------------|----------------|
| No.                 | Peak Name | Retention Time<br>min | Area<br>mAU*min | Height<br>mAU | Relative Area<br>% | Asymmetry (EP) |
| 1                   |           | 5.842                 | 118.006         | 802.758       | 49.93              | 1.09           |
| 2                   |           | 6.548                 | 118.338         | 687.058       | 50.07              | 1.09           |
| <b>Total:</b>       |           |                       |                 |               | <b>100.00</b>      |                |

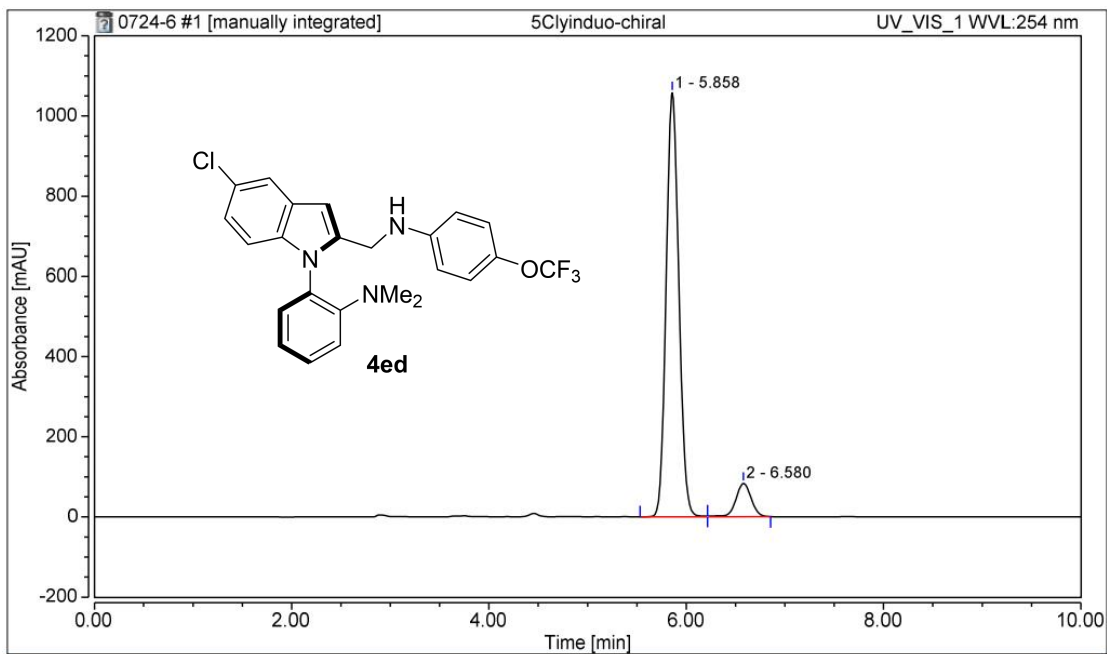

| Integration Results |           |                       |                 |               |                    |                |
|---------------------|-----------|-----------------------|-----------------|---------------|--------------------|----------------|
| No.                 | Peak Name | Retention Time<br>min | Area<br>mAU*min | Height<br>mAU | Relative Area<br>% | Asymmetry (EP) |
| 1                   |           | 5.858                 | 157.483         | 1057.291      | 91.33              | 1.10           |
| 2                   |           | 6.580                 | 14.951          | 83.125        | 8.67               | 1.02           |
| <b>Total:</b>       |           |                       |                 |               | <b>100.00</b>      |                |



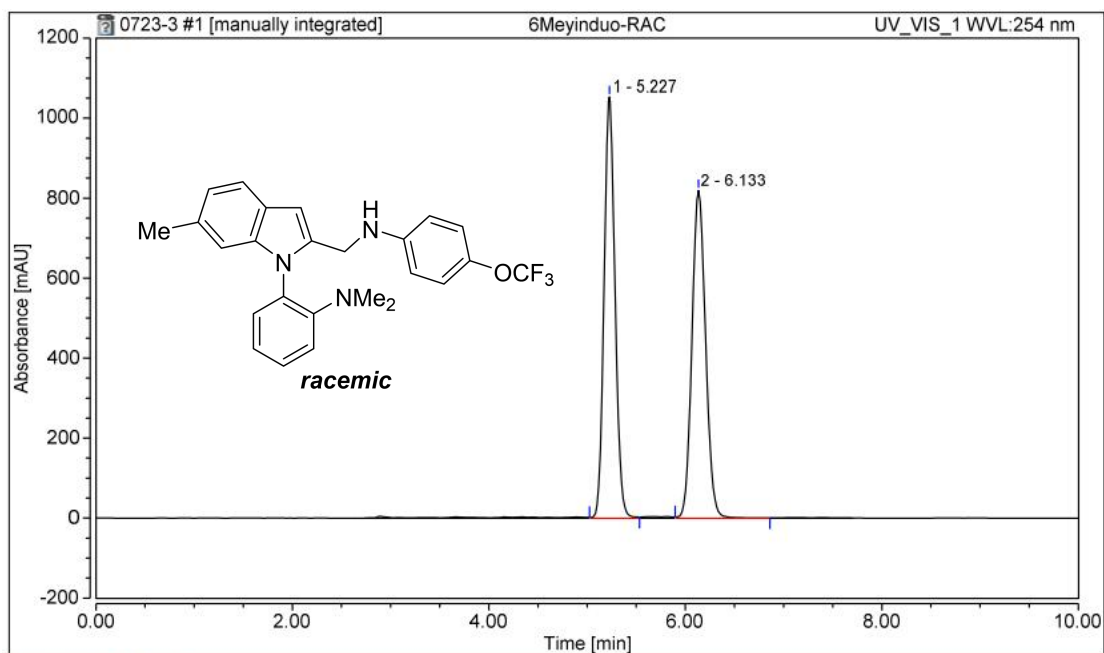

| Integration Results |           |                    |              |            |                 |                |
|---------------------|-----------|--------------------|--------------|------------|-----------------|----------------|
| No.                 | Peak Name | Retention Time min | Area mAU*min | Height mAU | Relative Area % | Asymmetry (EP) |
| 1                   |           | 5.227              | 135.506      | 1053.406   | 50.71           | 1.10           |
| 2                   |           | 6.133              | 131.685      | 819.253    | 49.29           | 1.10           |
| <b>Total:</b>       |           |                    |              |            | <b>100.00</b>   |                |

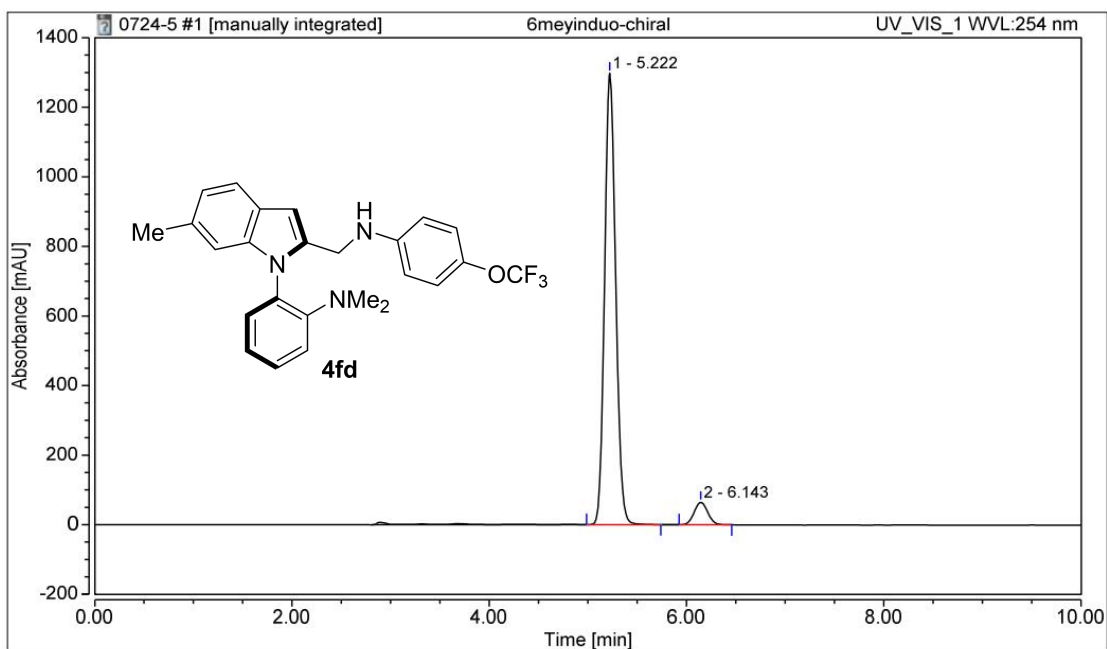

| Integration Results |           |                    |              |            |                 |                |
|---------------------|-----------|--------------------|--------------|------------|-----------------|----------------|
| No.                 | Peak Name | Retention Time min | Area mAU*min | Height mAU | Relative Area % | Asymmetry (EP) |
| 1                   |           | 5.222              | 169.283      | 1297.993   | 94.25           | 1.12           |
| 2                   |           | 6.143              | 10.326       | 64.515     | 5.75            | 1.07           |
| <b>Total:</b>       |           |                    |              |            | <b>100.00</b>   |                |



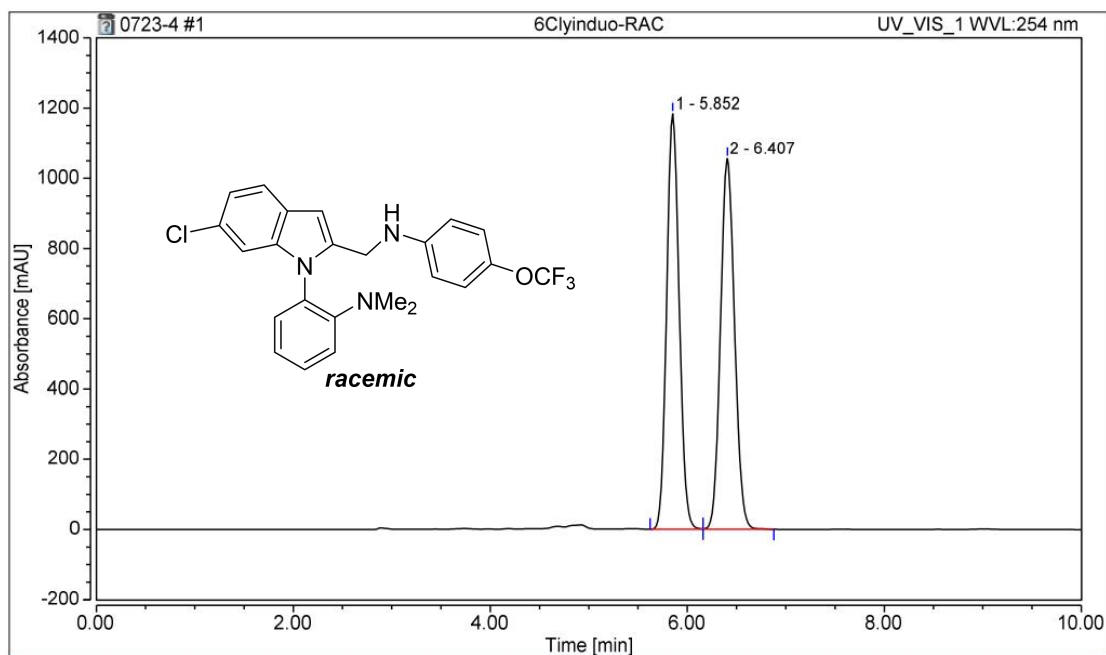

| Integration Results |           |                    |              |            |                 |                |
|---------------------|-----------|--------------------|--------------|------------|-----------------|----------------|
| No.                 | Peak Name | Retention Time min | Area mAU*min | Height mAU | Relative Area % | Asymmetry (EP) |
| 1                   |           | 5.852              | 174.194      | 1182.726   | 49.89           | 1.09           |
| 2                   |           | 6.407              | 174.944      | 1055.605   | 50.11           | 1.08           |
| <b>Total:</b>       |           |                    |              |            | <b>100.00</b>   |                |

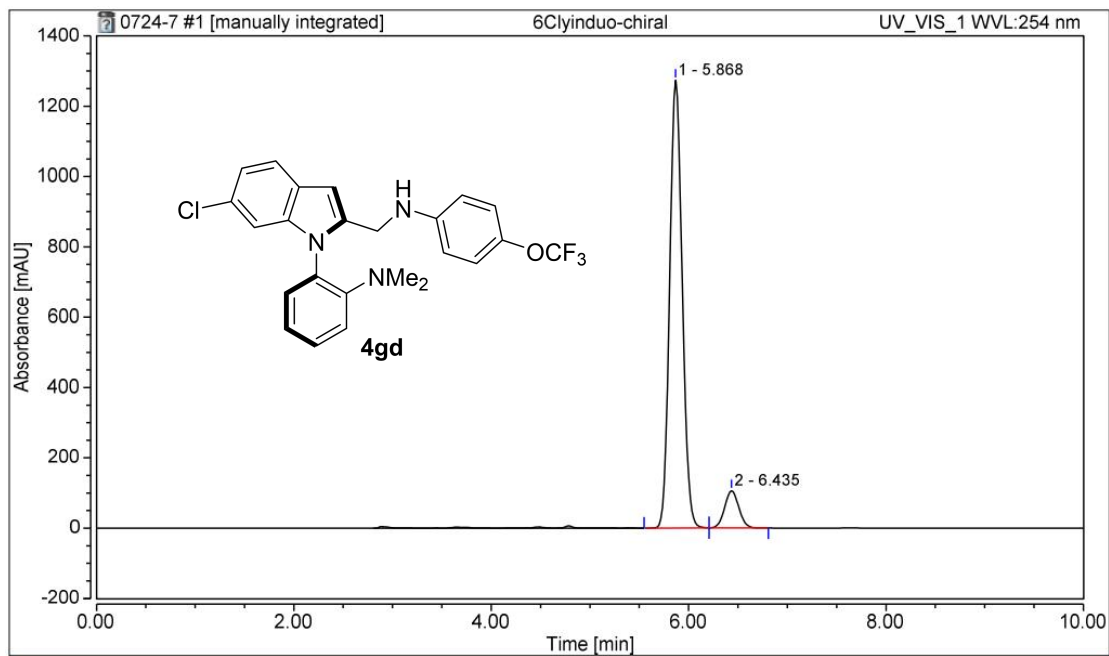

| Integration Results |           |                    |              |            |                 |                |
|---------------------|-----------|--------------------|--------------|------------|-----------------|----------------|
| No.                 | Peak Name | Retention Time min | Area mAU*min | Height mAU | Relative Area % | Asymmetry (EP) |
| 1                   |           | 5.868              | 187.269      | 1273.535   | 91.36           | 1.10           |
| 2                   |           | 6.435              | 17.717       | 106.068    | 8.64            | 1.06           |
| <b>Total:</b>       |           |                    |              |            | <b>100.00</b>   |                |

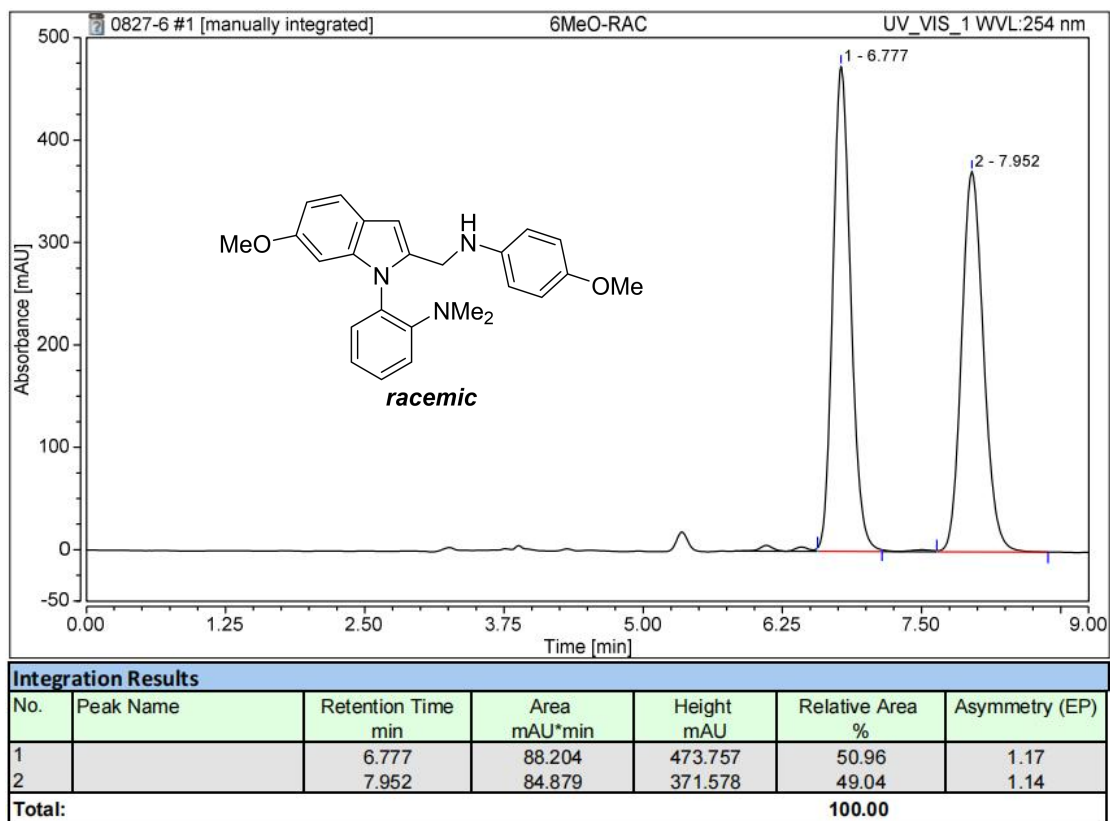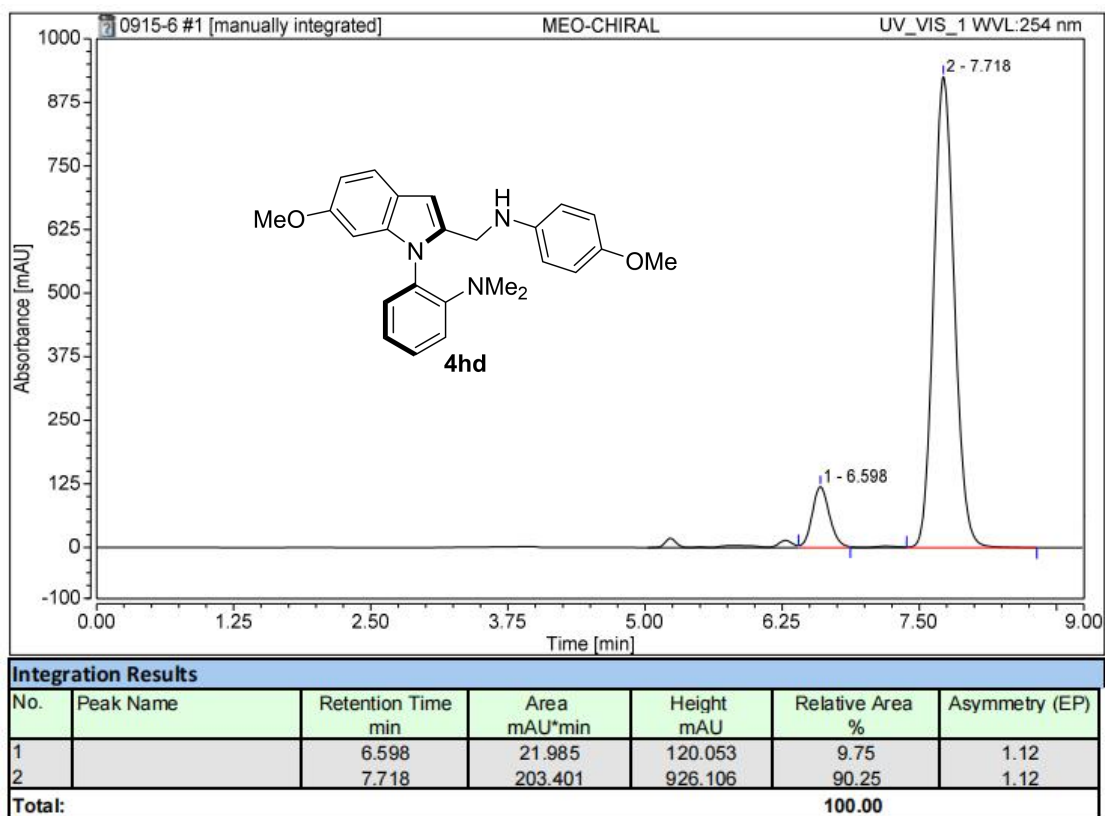

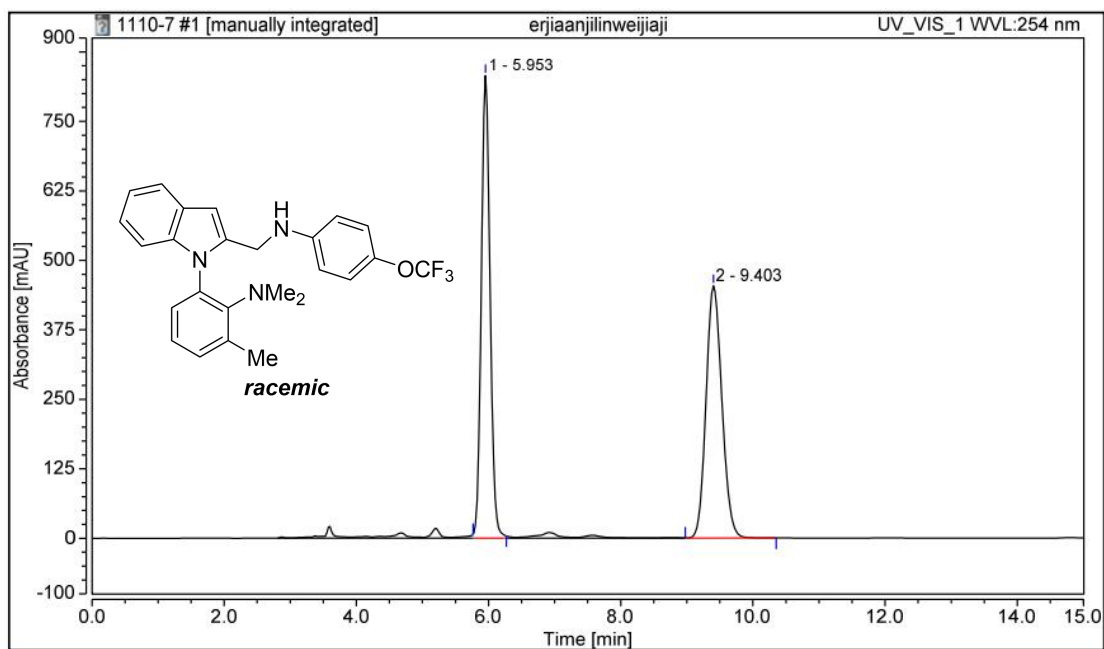

#### Integration Results

| No.           | Peak Name | Retention Time min | Area mAU*min | Height mAU | Relative Area % | Asymmetry (EP) |
|---------------|-----------|--------------------|--------------|------------|-----------------|----------------|
| 1             |           | 5.953              | 127.755      | 832.140    | 50.30           | 1.10           |
| 2             |           | 9.403              | 126.247      | 453.961    | 49.70           | 1.12           |
| <b>Total:</b> |           |                    |              |            | <b>100.00</b>   |                |

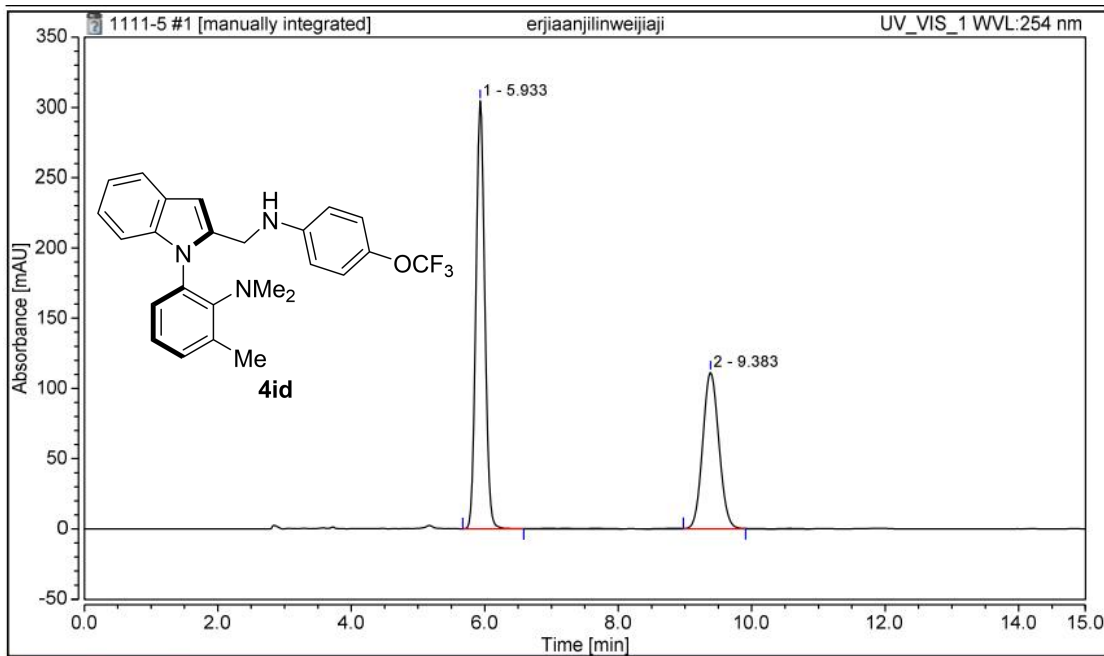

#### Integration Results

| No.           | Peak Name | Retention Time min | Area mAU*min | Height mAU | Relative Area % | Asymmetry (EP) |
|---------------|-----------|--------------------|--------------|------------|-----------------|----------------|
| 1             |           | 5.933              | 46.803       | 304.595    | 59.90           | 1.07           |
| 2             |           | 9.383              | 31.327       | 111.464    | 40.10           | 1.08           |
| <b>Total:</b> |           |                    |              |            | <b>100.00</b>   |                |

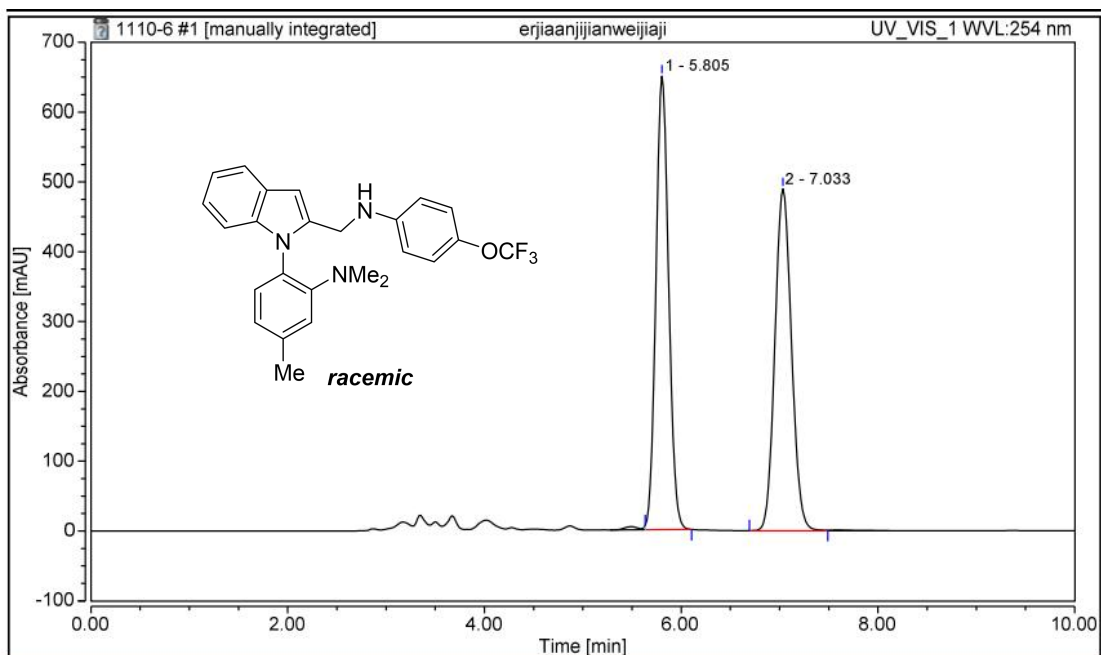

| Integration Results |           |                    |              |            |                 |                |
|---------------------|-----------|--------------------|--------------|------------|-----------------|----------------|
| No.                 | Peak Name | Retention Time min | Area mAU*min | Height mAU | Relative Area % | Asymmetry (EP) |
| 1                   |           | 5.805              | 97.386       | 649.735    | 50.45           | 1.09           |
| 2                   |           | 7.033              | 95.655       | 489.637    | 49.55           | 1.09           |
| <b>Total:</b>       |           |                    |              |            | <b>100.00</b>   |                |

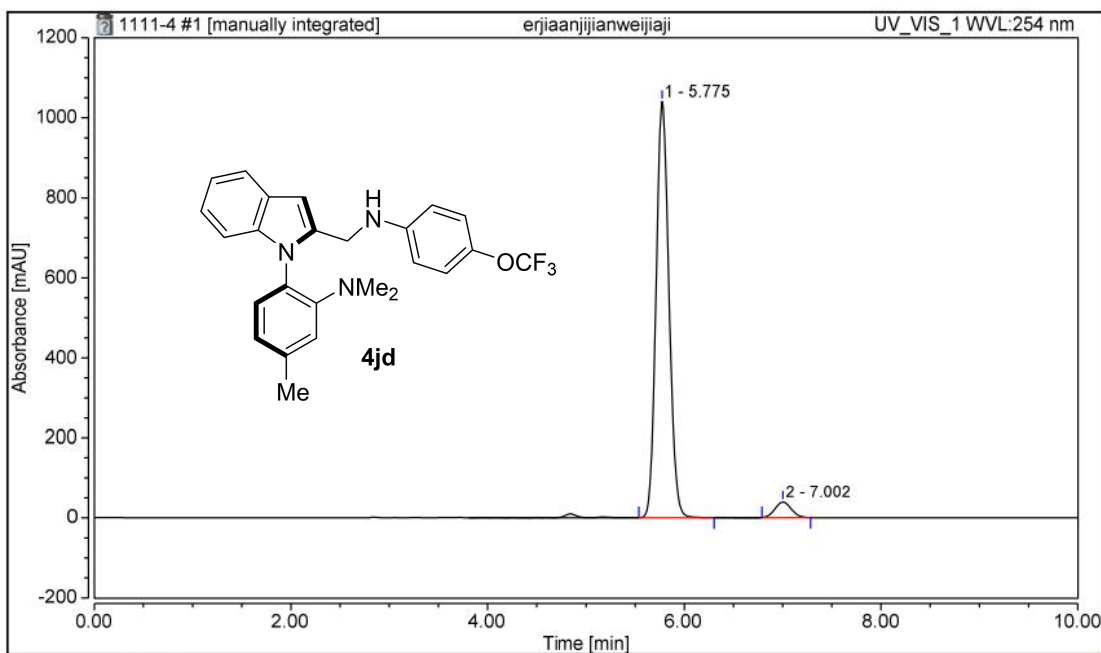

| Integration Results |           |                    |              |            |                 |                |
|---------------------|-----------|--------------------|--------------|------------|-----------------|----------------|
| No.                 | Peak Name | Retention Time min | Area mAU*min | Height mAU | Relative Area % | Asymmetry (EP) |
| 1                   |           | 5.775              | 157.456      | 1040.413   | 95.41           | 1.11           |
| 2                   |           | 7.002              | 7.578        | 39.067     | 4.59            | 1.06           |
| <b>Total:</b>       |           |                    |              |            | <b>100.00</b>   |                |

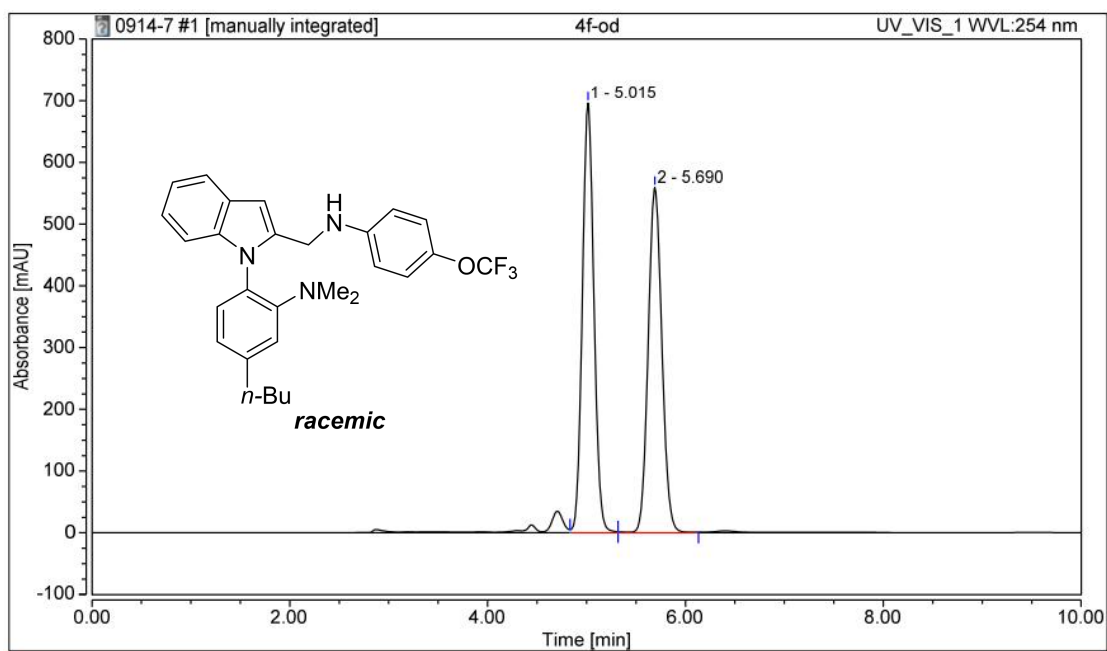

| Integration Results |           |                    |              |            |                 |                |
|---------------------|-----------|--------------------|--------------|------------|-----------------|----------------|
| No.                 | Peak Name | Retention Time min | Area mAU*min | Height mAU | Relative Area % | Asymmetry (EP) |
| 1                   |           | 5.015              | 94.112       | 696.270    | 51.15           | 1.08           |
| 2                   |           | 5.690              | 89.882       | 559.356    | 48.85           | 1.09           |
| <b>Total:</b>       |           |                    |              |            | <b>100.00</b>   |                |

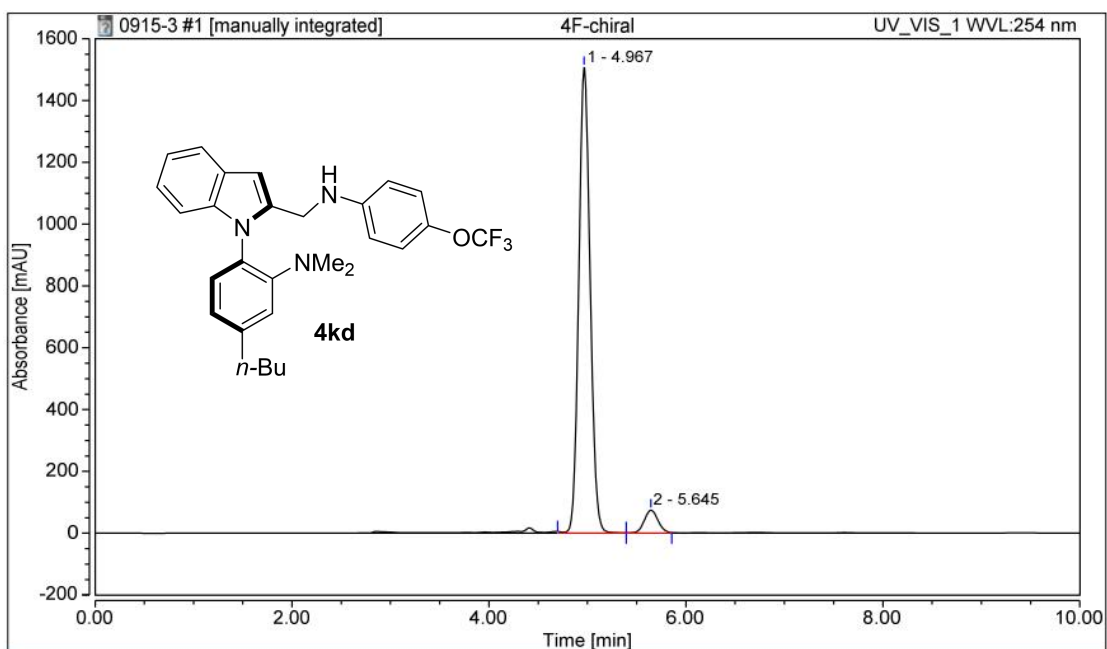

| Integration Results |           |                    |              |            |                 |                |
|---------------------|-----------|--------------------|--------------|------------|-----------------|----------------|
| No.                 | Peak Name | Retention Time min | Area mAU*min | Height mAU | Relative Area % | Asymmetry (EP) |
| 1                   |           | 4.967              | 201.976      | 1506.944   | 94.26           | 1.10           |
| 2                   |           | 5.645              | 12.306       | 74.875     | 5.74            | 1.07           |
| <b>Total:</b>       |           |                    |              |            | <b>100.00</b>   |                |

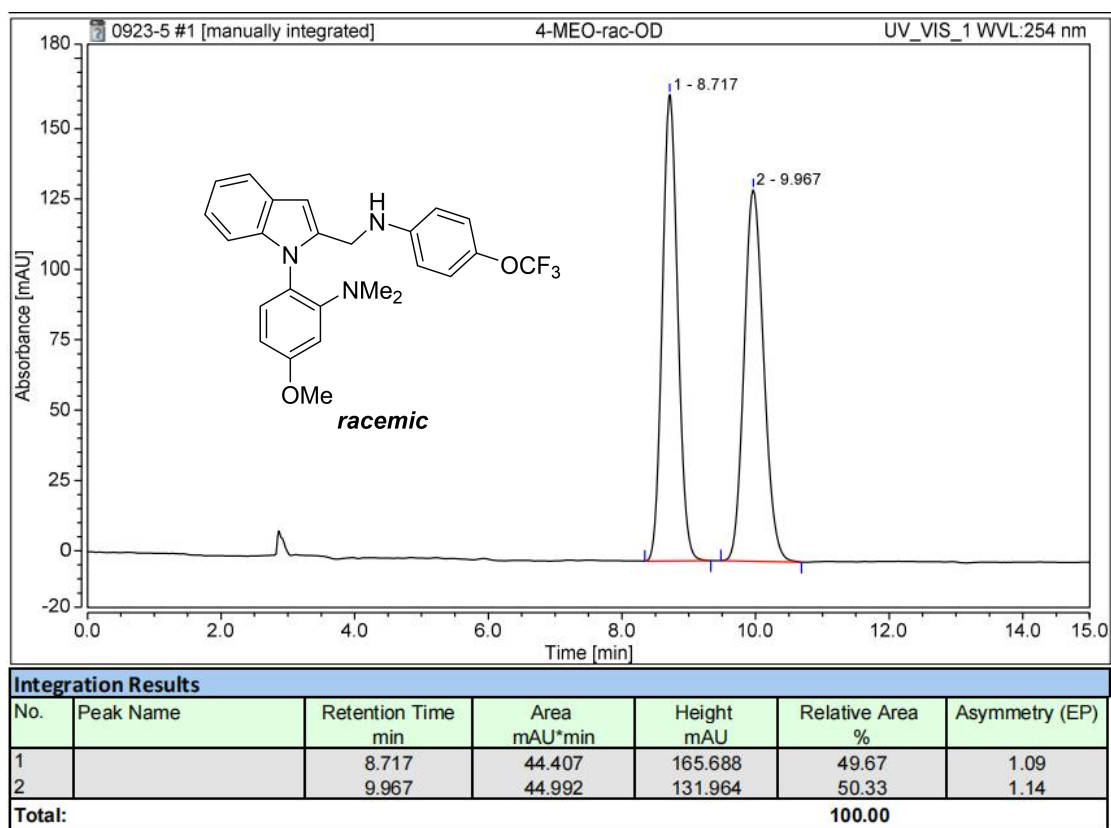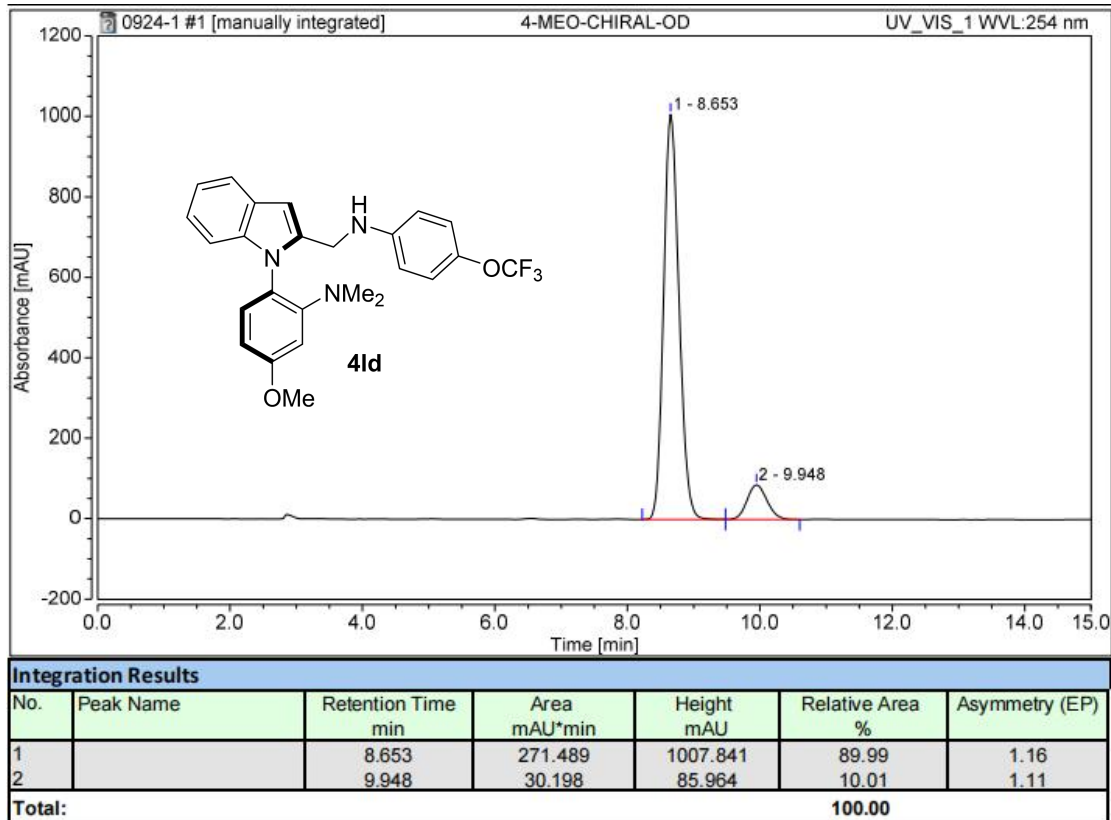

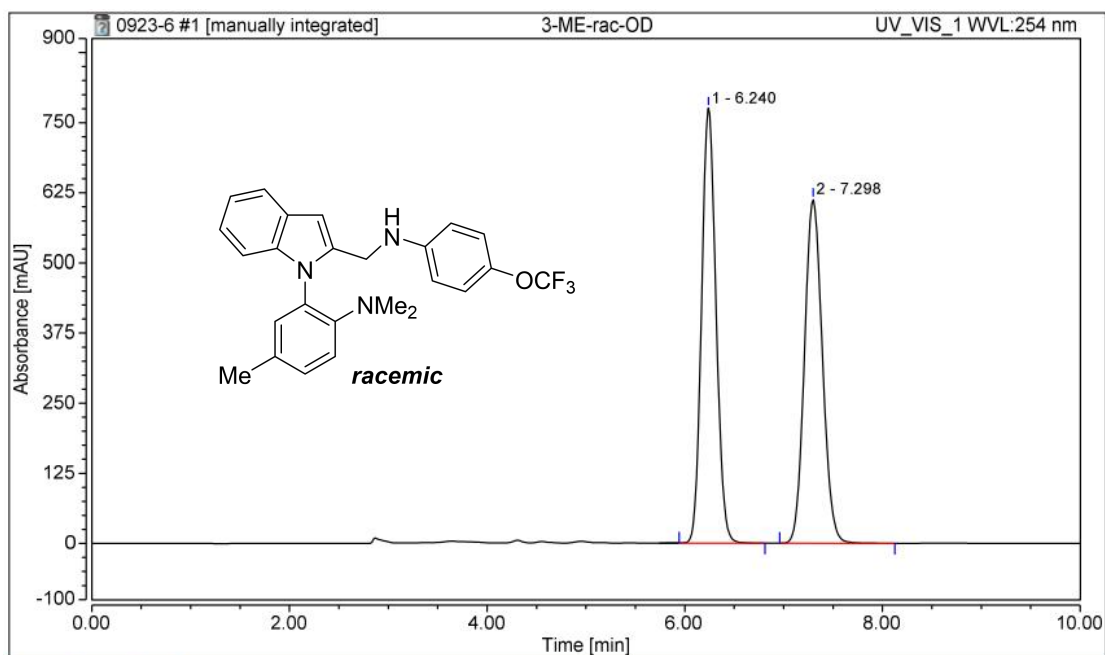

| Integration Results |           |                    |              |            |                 |                |
|---------------------|-----------|--------------------|--------------|------------|-----------------|----------------|
| No.                 | Peak Name | Retention Time min | Area mAU*min | Height mAU | Relative Area % | Asymmetry (EP) |
| 1                   |           | 6.240              | 130.797      | 775.778    | 50.39           | 1.10           |
| 2                   |           | 7.298              | 128.755      | 613.085    | 49.61           | 1.09           |
| <b>Total:</b>       |           |                    |              |            | <b>100.00</b>   |                |

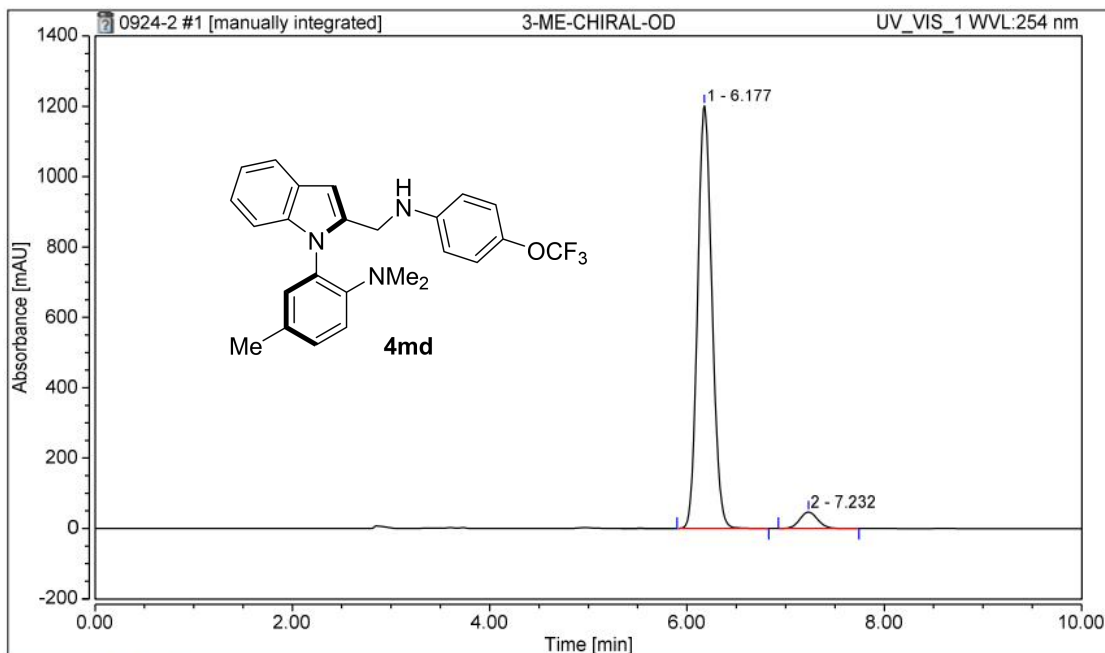

| Integration Results |           |                    |              |            |                 |                |
|---------------------|-----------|--------------------|--------------|------------|-----------------|----------------|
| No.                 | Peak Name | Retention Time min | Area mAU*min | Height mAU | Relative Area % | Asymmetry (EP) |
| 1                   |           | 6.177              | 202.133      | 1201.455   | 95.36           | 1.11           |
| 2                   |           | 7.232              | 9.836        | 46.861     | 4.64            | 1.07           |
| <b>Total:</b>       |           |                    |              |            | <b>100.00</b>   |                |



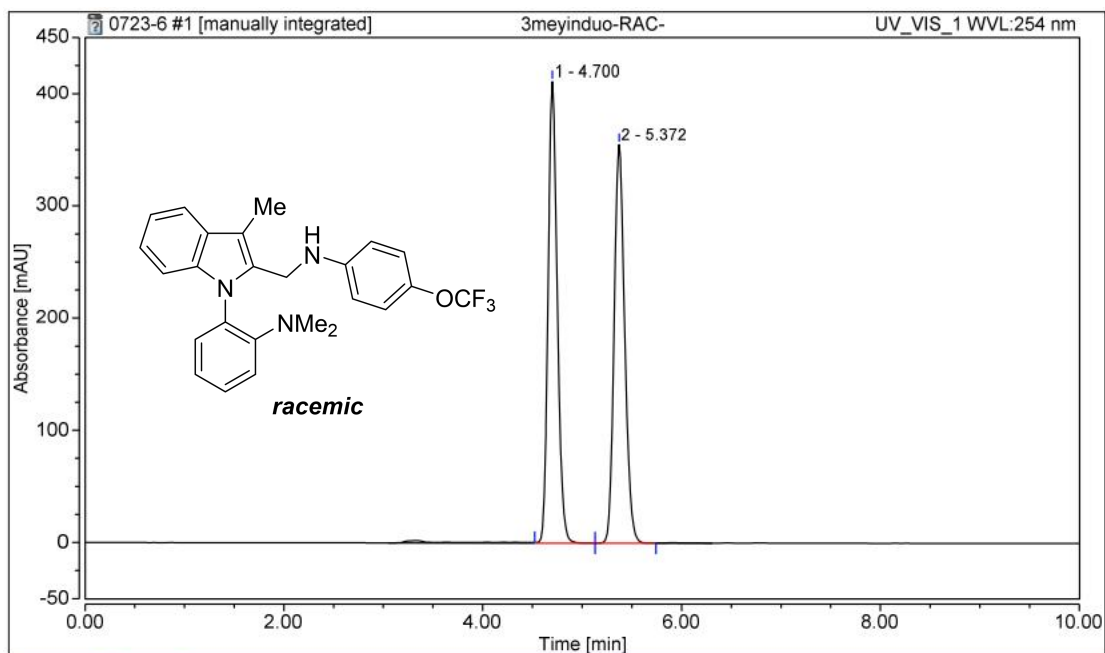

| Integration Results |           |                    |              |            |                 |                |
|---------------------|-----------|--------------------|--------------|------------|-----------------|----------------|
| No.                 | Peak Name | Retention Time min | Area mAU*min | Height mAU | Relative Area % | Asymmetry (EP) |
| 1                   |           | 4.700              | 43.973       | 411.347    | 50.12           | 1.18           |
| 2                   |           | 5.372              | 43.770       | 355.179    | 49.88           | 1.16           |
| <b>Total:</b>       |           |                    |              |            | <b>100.00</b>   |                |

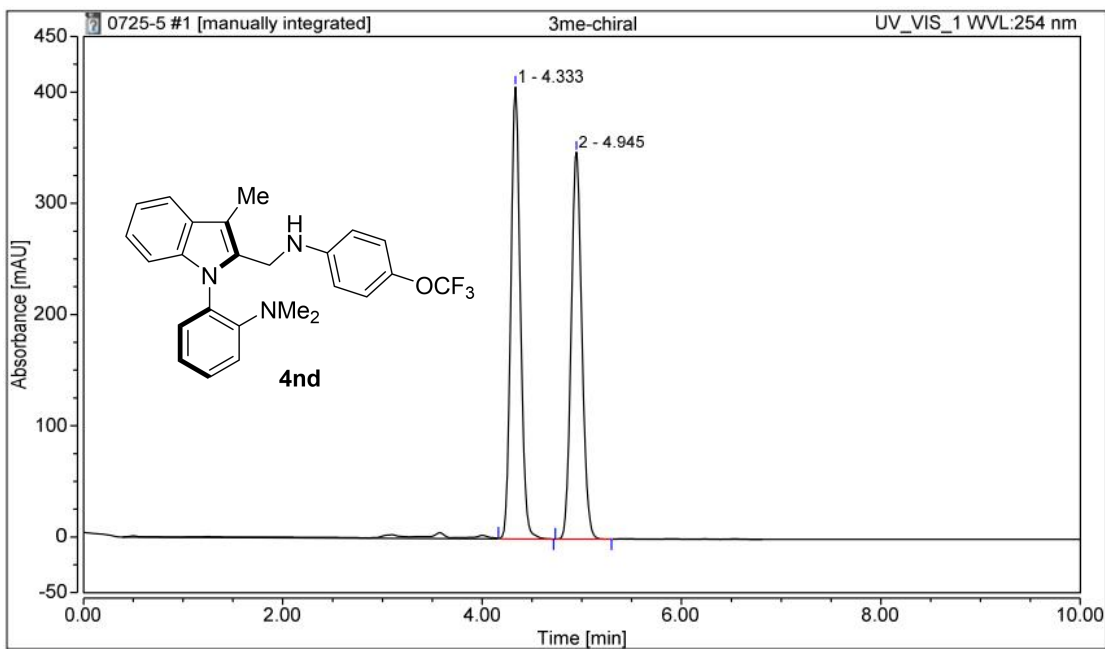

| Integration Results |           |                    |              |            |                 |                |
|---------------------|-----------|--------------------|--------------|------------|-----------------|----------------|
| No.                 | Peak Name | Retention Time min | Area mAU*min | Height mAU | Relative Area % | Asymmetry (EP) |
| 1                   |           | 4.333              | 44.878       | 406.329    | 50.91           | 1.11           |
| 2                   |           | 4.945              | 43.271       | 347.797    | 49.09           | 1.10           |
| <b>Total:</b>       |           |                    |              |            | <b>100.00</b>   |                |



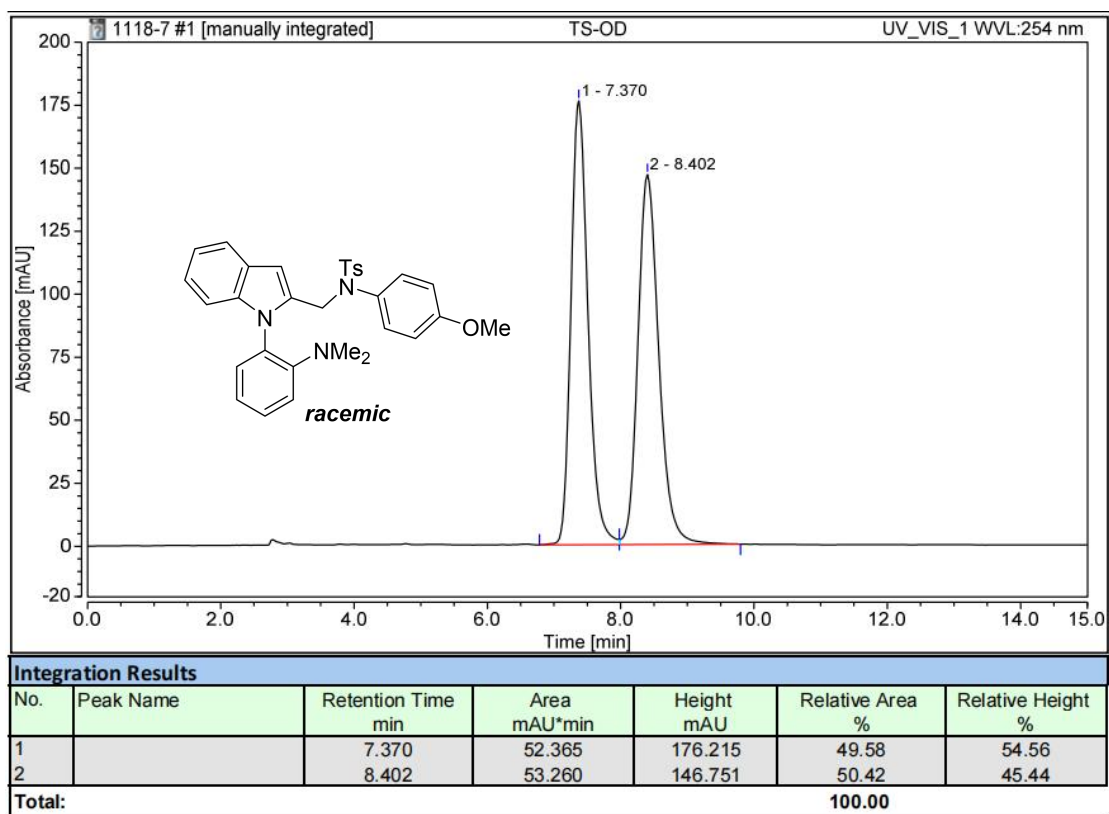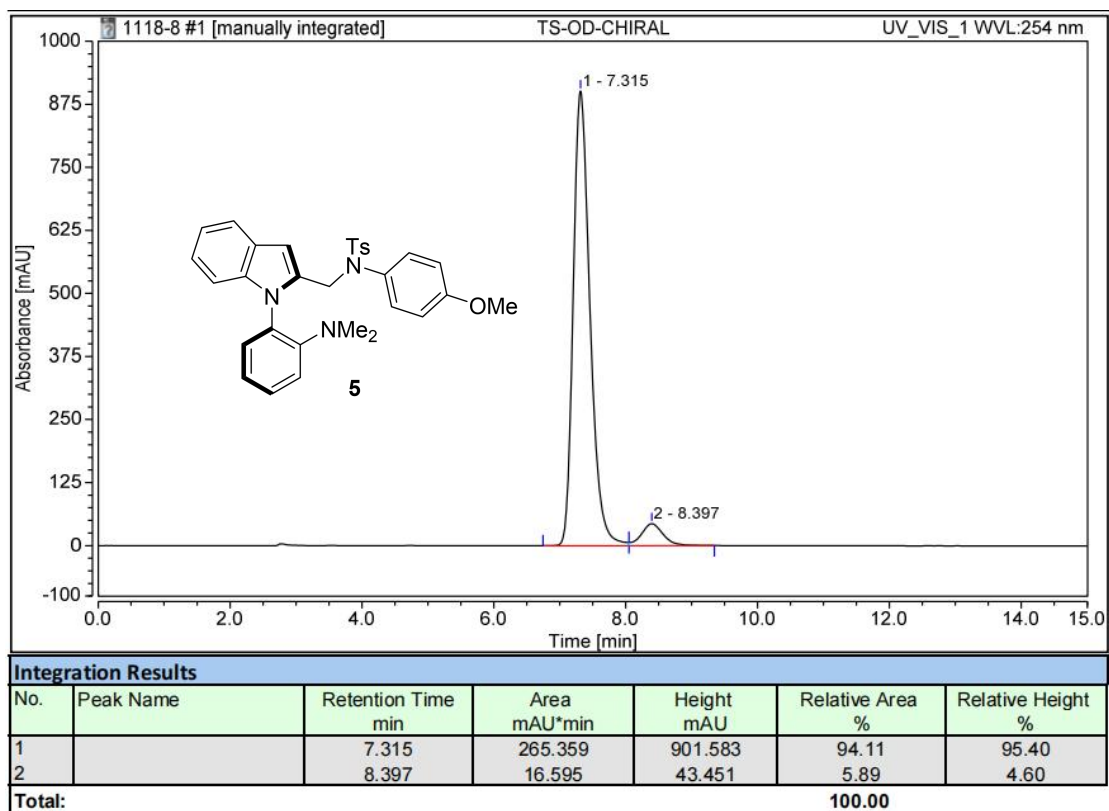

Supplement: d4qo00616j1.pdf [file d4qo00616j1.pdf]
